# Supplementary material for: A timed tally counter for microscopic examination of thick blood smears in malaria studies
Source: Springer Nature journal article supplement (doi:10.1186/s12936-020-03530-z), 2021-01-05
Supplement: MOESM1 [file 18735396]

# Supplementary Material: Complete Raw and per HPFs Data

G. Nuel and A. Garcia

## Contents

|          |                                               |            |
|----------|-----------------------------------------------|------------|
| <b>1</b> | <b>Raw data</b>                               | <b>2</b>   |
| 1.1      | A094 . . . . .                                | 3          |
| 1.2      | A098 . . . . .                                | 13         |
| 1.3      | A100 . . . . .                                | 24         |
| 1.4      | OPT211 . . . . .                              | 37         |
| 1.5      | OPT257 . . . . .                              | 50         |
| 1.6      | OPT271 . . . . .                              | 61         |
| 1.7      | SL:13 . . . . .                               | 72         |
| 1.8      | SL007 . . . . .                               | 80         |
| 1.9      | SL057 . . . . .                               | 91         |
| <b>2</b> | <b>Leukocyte and parasite counts per HPFs</b> | <b>100</b> |
| 2.1      | A094 . . . . .                                | 101        |
| 2.2      | A098 . . . . .                                | 103        |
| 2.3      | A100 . . . . .                                | 105        |
| 2.4      | OPT211 . . . . .                              | 107        |
| 2.5      | OPT257 . . . . .                              | 108        |
| 2.6      | OPT271 . . . . .                              | 110        |
| 2.7      | SL:13 . . . . .                               | 112        |
| 2.8      | SL007 . . . . .                               | 113        |
| 2.9      | SL057 . . . . .                               | 114        |

# 1 Raw data

We here present the original data collected using the Timed Tally Counter. Elapsed time are expressed in seconds and the “leuko” columns indicates if the counting button pressed was or not the leukocyte button.

## 1.1 A094

Table 1: Raw data of TBS A094.

| time B | leuko B | time D | leuko D |
|--------|---------|--------|---------|
| 0.00   | 1       | 0.00   | 1       |
| 0.28   | 1       | 0.20   | 1       |
| 0.25   | 1       | 0.18   | 1       |
| 0.35   | 1       | 0.25   | 1       |
| 0.25   | 1       | 0.22   | 1       |
| 0.21   | 1       | 0.21   | 1       |
| 0.28   | 1       | 0.28   | 1       |
| 0.25   | 1       | 0.22   | 1       |
| 0.21   | 1       | 0.25   | 1       |
| 0.24   | 1       | 4.60   | 1       |
| 7.66   | 1       | 0.20   | 1       |
| 0.26   | 1       | 0.68   | 1       |
| 0.24   | 1       | 0.19   | 1       |
| 0.38   | 1       | 2.14   | 1       |
| 0.27   | 1       | 0.19   | 1       |
| 0.07   | 1       | 0.66   | 1       |
| 0.15   | 1       | 0.20   | 1       |
| 0.21   | 1       | 0.19   | 1       |
| 5.08   | 1       | 0.24   | 1       |
| 0.26   | 1       | 4.16   | 1       |
| 3.94   | 1       | 0.21   | 1       |
| 0.03   | 1       | 0.18   | 1       |
| 0.23   | 1       | 0.19   | 1       |
| 0.23   | 1       | 0.64   | 1       |
| 0.10   | 1       | 0.20   | 1       |
| 5.77   | 1       | 0.20   | 1       |
| 0.34   | 1       | 0.18   | 1       |
| 0.27   | 1       | 0.19   | 1       |
| 0.21   | 1       | 0.21   | 1       |
| 6.78   | 1       | 0.20   | 1       |
| 0.26   | 1       | 0.73   | 1       |
| 0.23   | 1       | 2.08   | 1       |
| 6.31   | 1       | 0.25   | 1       |
| 0.28   | 1       | 0.91   | 1       |
| 0.24   | 1       | 3.61   | 1       |
| 0.24   | 1       | 0.33   | 1       |
| 0.22   | 1       | 0.31   | 1       |
| 10.71  | 1       | 0.30   | 1       |
| 0.27   | 1       | 0.26   | 1       |
| 0.24   | 1       | 0.29   | 1       |
| 0.23   | 1       | 0.29   | 1       |
| 3.48   | 1       | 0.32   | 1       |
| 0.28   | 1       | 17.85  | 1       |
| 0.23   | 1       | 0.25   | 1       |
| 4.26   | 1       | 0.21   | 1       |
| 0.03   | 1       | 0.19   | 1       |
| 0.29   | 1       | 0.16   | 1       |
| 0.28   | 1       | 0.86   | 1       |
| 0.23   | 1       | 0.21   | 1       |

| time B | leuko B | time D | leuko D |
|--------|---------|--------|---------|
| 0.34   | 1       | 0.20   | 1       |
| 0.23   | 1       | 2.59   | 1       |
| 0.22   | 1       | 0.22   | 1       |
| 4.45   | 1       | 0.20   | 1       |
| 0.30   | 1       | 0.20   | 1       |
| 0.25   | 1       | 0.18   | 1       |
| 6.75   | 1       | 0.16   | 1       |
| 0.28   | 1       | 15.82  | 1       |
| 0.24   | 1       | 0.34   | 1       |
| 0.22   | 1       | 0.27   | 1       |
| 5.30   | 1       | 5.35   | 1       |
| 0.01   | 1       | 4.37   | 1       |
| 0.23   | 1       | 0.27   | 1       |
| 0.23   | 1       | 0.23   | 1       |
| 0.21   | 1       | 0.18   | 1       |
| 5.82   | 1       | 0.19   | 1       |
| 0.25   | 1       | 0.18   | 1       |
| 0.24   | 1       | 0.27   | 1       |
| 0.21   | 1       | 0.51   | 1       |
| 0.23   | 1       | 0.27   | 1       |
| 4.91   | 1       | 12.44  | 1       |
| 0.29   | 1       | 0.25   | 1       |
| 7.30   | 1       | 0.24   | 1       |
| 0.25   | 1       | 0.20   | 1       |
| 1.15   | 1       | 8.61   | 1       |
| 0.26   | 1       | 0.20   | 1       |
| 4.11   | 1       | 0.17   | 1       |
| 7.58   | 1       | 0.16   | 1       |
| 0.03   | 1       | 2.03   | 1       |
| 0.21   | 1       | 0.20   | 1       |
| 4.19   | 1       | 0.20   | 1       |
| 0.26   | 1       | 0.18   | 1       |
| 2.50   | 1       | 0.04   | 1       |
| 0.25   | 1       | 0.11   | 1       |
| 5.69   | 1       | 0.18   | 1       |
| 4.50   | 1       | 0.21   | 1       |
| 0.27   | 1       | 0.20   | 1       |
| 3.65   | 1       | 0.19   | 1       |
| 0.28   | 1       | 0.18   | 1       |
| 3.37   | 1       | 0.45   | 1       |
| 0.31   | 1       | 0.38   | 1       |
| 0.51   | 1       | 0.21   | 1       |
| 0.30   | 1       | 0.19   | 1       |
| 0.64   | 1       | 0.21   | 1       |
| 5.47   | 1       | 0.19   | 1       |
| 0.28   | 1       | 0.20   | 1       |
| 0.26   | 1       | 0.19   | 1       |
| 0.23   | 1       | 0.23   | 1       |
| 5.16   | 1       | 0.83   | 1       |
| 5.39   | 1       | 0.25   | 1       |
| 3.49   | 1       | 0.39   | 1       |
| 4.95   | 1       | 0.24   | 1       |

| time B | leuko B | time D | leuko D |
|--------|---------|--------|---------|
| 0.28   | 1       | 0.24   | 1       |
| 0.24   | 1       | 0.19   | 1       |
| 0.19   | 1       | 0.20   | 1       |
| 3.88   | 1       | 0.23   | 1       |
| 0.26   | 1       | 0.76   | 1       |
| 0.27   | 1       | 0.25   | 1       |
| 0.21   | 1       | 0.21   | 1       |
| 0.21   | 1       | 0.25   | 1       |
| 0.23   | 1       | 0.22   | 1       |
| 3.44   | 1       | 0.23   | 1       |
| 0.29   | 1       | 0.25   | 1       |
| 0.22   | 1       | 2.07   | 1       |
| 0.25   | 1       | 0.24   | 1       |
| 2.98   | 1       | 0.19   | 1       |
| 0.34   | 1       | 4.69   | 1       |
| 3.43   | 1       | 0.19   | 1       |
| 0.29   | 1       | 0.17   | 1       |
| 0.23   | 1       | 0.35   | 1       |
| 0.22   | 1       | 0.17   | 1       |
| 4.30   | 1       | 4.25   | 1       |
| 0.28   | 1       | 0.22   | 1       |
| 0.24   | 1       | 0.20   | 1       |
| 0.22   | 1       | 0.20   | 1       |
| 3.20   | 1       | 0.18   | 1       |
| 3.98   | 1       | 4.72   | 1       |
| 0.28   | 1       | 0.21   | 1       |
| 0.72   | 1       | 0.21   | 1       |
| 0.26   | 1       | 0.19   | 1       |
| 0.22   | 1       | 0.98   | 1       |
| 8.87   | 1       | 0.21   | 1       |
| 0.29   | 1       | 0.20   | 1       |
| 0.25   | 1       | 0.17   | 1       |
| 0.22   | 1       | 0.19   | 1       |
| 5.29   | 1       | 0.30   | 1       |
| 0.26   | 1       | 0.19   | 1       |
| 5.39   | 1       | 0.16   | 1       |
| 0.25   | 1       | 0.19   | 1       |
| 0.22   | 1       | 0.21   | 1       |
| 0.22   | 1       | 0.92   | 1       |
| 0.24   | 1       | 0.33   | 1       |
| 0.30   | 1       | 0.27   | 1       |
| 6.82   | 1       | 0.26   | 1       |
| 0.23   | 1       | 0.51   | 1       |
| 0.05   | 1       | 0.32   | 1       |
| 0.13   | 1       | 0.32   | 1       |
| 10.29  | 1       | 1.06   | 1       |
| 0.29   | 1       | 0.67   | 1       |
| 0.26   | 1       | 0.34   | 1       |
| 0.23   | 1       | 0.61   | 1       |
| 6.26   | 1       | 4.36   | 1       |
| 0.27   | 1       | 0.21   | 1       |
| 0.25   | 1       | 0.20   | 1       |

| time B | leuko B | time D | leuko D |
|--------|---------|--------|---------|
| 0.24   | 1       | 0.18   | 1       |
| 0.85   | 1       | 0.19   | 1       |
| 0.32   | 1       | 0.21   | 1       |
| 0.24   | 1       | 0.21   | 1       |
| 0.18   | 1       | 0.22   | 1       |
| 4.21   | 1       | 0.22   | 1       |
| 5.25   | 1       | 0.22   | 1       |
| 0.31   | 1       | 0.24   | 1       |
| 5.81   | 1       | 0.37   | 1       |
| 0.28   | 1       | 0.21   | 1       |
| 0.24   | 1       | 8.71   | 1       |
| 7.46   | 1       | 0.24   | 1       |
| 0.29   | 1       | 0.18   | 1       |
| 0.23   | 1       | 1.05   | 1       |
| 0.24   | 1       | 0.21   | 1       |
| 0.32   | 1       | 0.18   | 1       |
| 0.23   | 1       | 7.32   | 1       |
| 4.71   | 1       | 0.21   | 1       |
| 0.29   | 1       | 0.16   | 1       |
| 0.05   | 1       | 0.17   | 1       |
| 0.20   | 1       | 0.88   | 1       |
| 0.25   | 1       | 0.21   | 1       |
| 0.35   | 1       | 0.18   | 1       |
| 0.23   | 1       | 0.17   | 1       |
| 3.96   | 1       | 0.20   | 1       |
| 0.27   | 1       | 0.22   | 1       |
| 0.04   | 1       | 0.22   | 1       |
| 0.19   | 1       | 0.20   | 1       |
| 0.22   | 1       | 0.86   | 1       |
| 0.04   | 1       | 0.24   | 1       |
| 3.32   | 1       | 0.19   | 1       |
| 0.30   | 1       | 0.18   | 1       |
| 0.91   | 1       | 0.16   | 1       |
| 0.27   | 1       | 0.18   | 1       |
| 2.59   | 1       | 0.17   | 1       |
| 2.31   | 1       | 0.19   | 1       |
| 0.27   | 1       | 0.18   | 1       |
| 0.24   | 1       | 0.14   | 1       |
| 0.24   | 1       | 0.18   | 1       |
| 0.22   | 1       | 0.18   | 1       |
| 2.57   | 1       | 0.19   | 1       |
| 0.29   | 1       | 0.19   | 1       |
| 0.71   | 1       | 0.15   | 1       |
| 0.27   | 1       | 0.38   | 1       |
| 2.28   | 1       | 0.67   | 1       |
| 0.28   | 1       | 0.23   | 1       |
| 0.26   | 1       | 0.22   | 1       |
| 0.22   | 1       | 0.19   | 1       |
| 0.23   | 1       | 0.22   | 1       |
| 3.88   | 1       | 0.22   | 1       |
| 0.29   | 1       | 0.22   | 1       |
| 0.65   | 1       | 0.20   | 1       |

| time B | leuko B | time D | leuko D |
|--------|---------|--------|---------|
| 0.27   | 1       | 0.21   | 1       |
| 0.26   | 1       | 1.60   | 1       |
| 0.17   | 1       | 0.20   | 1       |
| 2.44   | 1       | 0.18   | 1       |
| 0.25   | 1       | 0.16   | 1       |
| 0.23   | 1       | 0.76   | 1       |
| 0.23   | 1       | 0.17   | 1       |
| 0.22   | 1       | 0.20   | 1       |
| 0.22   | 1       | 0.18   | 1       |
| 4.69   | 1       | 2.51   | 1       |
| 0.30   | 1       | 0.21   | 1       |
| 0.26   | 1       | 0.18   | 1       |
| 3.46   | 1       | 0.22   | 1       |
| 0.27   | 1       | 0.21   | 1       |
| 0.24   | 1       | 0.52   | 1       |
| 0.23   | 1       | 0.21   | 1       |
| 3.82   | 1       | 0.22   | 1       |
| 0.29   | 1       | 0.08   | 1       |
| 0.25   | 1       | 0.22   | 1       |
| 0.25   | 1       | 0.12   | 1       |
| 4.50   | 1       | 0.15   | 1       |
| 0.28   | 1       | 0.27   | 1       |
| 0.23   | 1       | 0.75   | 1       |
| 0.37   | 1       | 0.23   | 1       |
| 0.27   | 1       | 0.15   | 1       |
| 0.23   | 1       | 0.17   | 1       |
| 0.22   | 1       | 0.18   | 1       |
| 6.54   | 1       | 11.78  | 1       |
| 0.27   | 1       | 0.18   | 1       |
| 0.62   | 1       | 0.17   | 1       |
| 0.26   | 1       | 0.20   | 1       |
| 0.24   | 1       | 0.30   | 1       |
| 0.23   | 1       | 0.24   | 1       |
| 0.28   | 1       | 0.29   | 1       |
| 0.23   | 1       | 0.30   | 1       |
| 0.21   | 1       | 0.24   | 1       |
| 4.16   | 1       | 0.58   | 1       |
| 0.27   | 1       | 4.44   | 1       |
| 0.24   | 1       | 0.24   | 1       |
| 0.21   | 1       | 0.17   | 1       |
| 0.20   | 1       | 0.12   | 1       |
| 0.42   | 1       | 0.17   | 1       |
| 0.22   | 1       | 0.17   | 1       |
| 0.34   | 1       | 0.19   | 1       |
| 0.24   | 1       | 0.14   | 1       |
| 6.01   | 1       | 0.24   | 1       |
| 0.31   | 1       | 1.26   | 1       |
| 0.24   | 1       | 0.20   | 1       |
| 0.24   | 1       | 0.19   | 1       |
| 0.30   | 1       | 0.16   | 1       |
| 0.24   | 1       | 0.19   | 1       |
| 0.23   | 1       | 0.30   | 1       |

| time B | leuko B | time D | leuko D |
|--------|---------|--------|---------|
| 0.24   | 1       | 0.20   | 1       |
| 0.31   | 1       | 0.16   | 1       |
| 0.25   | 1       | 0.56   | 1       |
| 0.23   | 1       | 1.05   | 1       |
| 0.21   | 1       | 0.28   | 1       |
| 0.27   | 1       | 0.20   | 1       |
| 0.25   | 1       | 0.18   | 1       |
| 0.22   | 1       | 0.19   | 1       |
| 6.99   | 1       | 0.19   | 1       |
| 0.25   | 1       | 0.21   | 1       |
| 0.23   | 1       | 0.17   | 1       |
| 0.23   | 1       | 0.15   | 1       |
| 0.36   | 1       | 0.18   | 1       |
| 0.24   | 1       | 0.60   | 1       |
| 0.23   | 1       | 0.21   | 1       |
| 0.23   | 1       | 0.20   | 1       |
| 0.27   | 1       | 0.19   | 1       |
| 0.24   | 1       | 0.19   | 1       |
| 0.21   | 1       | 0.32   | 1       |
| 5.51   | 1       | 0.19   | 1       |
| 0.26   | 1       | 0.21   | 1       |
| 0.26   | 1       | 0.36   | 1       |
| 0.21   | 1       | 0.19   | 1       |
| 0.67   | 1       | 0.93   | 1       |
| 0.26   | 1       | 0.19   | 1       |
| 4.83   | 1       | 0.18   | 1       |
| 0.28   | 1       | 0.19   | 1       |
| 0.26   | 1       | 0.18   | 1       |
| 0.26   | 1       | 0.19   | 1       |
| 0.25   | 1       | 0.20   | 1       |
| 0.21   | 1       | 0.41   | 1       |
| 0.24   | 1       | 0.21   | 1       |
| 0.35   | 1       | 0.37   | 1       |
| 0.25   | 1       | 0.81   | 1       |
| 0.24   | 1       | 2.05   | 1       |
| 0.22   | 1       | 0.19   | 1       |
| 0.33   | 1       | 0.24   | 1       |
| 0.25   | 1       | 0.19   | 1       |
| 0.22   | 1       | 0.19   | 1       |
| 0.23   | 1       | 0.19   | 1       |
| 5.65   | 1       | 0.19   | 1       |
| 0.28   | 1       | 0.20   | 1       |
| 0.26   | 1       | 0.18   | 1       |
| 0.89   | 1       | 1.59   | 1       |
| 0.27   | 1       | 0.15   | 1       |
| 0.23   | 1       | 0.18   | 1       |
| 0.23   | 1       | 0.19   | 1       |
| 0.22   | 1       | 0.22   | 1       |
| 0.27   | 1       | 0.20   | 1       |
| 0.25   | 1       | 0.22   | 1       |
| 0.23   | 1       | 0.21   | 1       |
| 0.23   | 1       | 0.27   | 1       |



| time B | leuko B | time D | leuko D |
|--------|---------|--------|---------|
| 5.15   | 1       | 0.21   | 1       |
| 0.25   | 1       | 0.21   | 1       |
| 0.39   | 1       | 0.19   | 1       |
| 0.25   | 1       | 1.00   | 1       |
| 0.22   | 1       | 1.23   | 1       |
| 3.85   | 1       | 0.17   | 1       |
| 0.27   | 1       | 1.55   | 1       |
| 0.23   | 1       | 0.25   | 1       |
| 0.24   | 1       | 0.17   | 1       |
| 0.21   | 1       | 0.16   | 1       |
| 3.64   | 1       | 0.17   | 1       |
| 0.26   | 1       | 0.22   | 1       |
| 0.21   | 1       | 0.24   | 1       |
| 0.24   | 1       | 0.32   | 1       |
| 0.42   | 1       | 0.35   | 1       |
| 0.26   | 1       | 10.18  | 1       |
| 0.26   | 1       | 0.32   | 1       |
| 0.22   | 1       | 0.24   | 1       |
| 0.38   | 1       | 0.21   | 1       |
| 0.27   | 1       | 0.18   | 1       |
| 0.25   | 1       | 0.19   | 1       |
| 0.23   | 1       | 0.18   | 1       |
| 0.31   | 1       | 0.99   | 1       |
| 0.23   | 1       | 0.20   | 1       |
| 0.23   | 1       | 0.20   | 1       |
| 0.22   | 1       | 0.22   | 1       |
| 7.34   | 1       | 0.20   | 1       |
| 0.28   | 1       | 0.20   | 1       |
| 0.25   | 1       | 0.21   | 1       |
| 0.24   | 1       | 1.45   | 1       |
| 0.29   | 1       | 0.25   | 1       |
| 0.23   | 1       | 0.30   | 1       |
| 0.22   | 1       | 3.41   | 1       |
| 0.24   | 1       | 1.02   | 1       |
| 0.35   | 1       | 0.48   | 1       |
| 0.24   | 1       | 4.35   | 1       |
| 0.23   | 1       | 0.25   | 1       |
| 0.28   | 1       | 0.21   | 1       |
| 0.23   | 1       | 0.19   | 1       |
| 0.22   | 1       | 0.18   | 1       |
| 0.20   | 1       | 0.21   | 1       |
| 0.22   | 1       | 0.15   | 1       |
| 0.21   | 1       | 0.18   | 1       |
| 5.09   | 1       | 0.17   | 1       |
| 0.26   | 1       | 0.74   | 1       |
| 0.25   | 1       | 0.20   | 1       |
| 0.25   | 1       | 0.18   | 1       |
| 0.34   | 1       | 0.20   | 1       |
| 0.27   | 1       | 0.32   | 1       |
| 0.23   | 1       | 0.19   | 1       |
| 0.36   | 1       | 0.17   | 1       |
| 0.24   | 1       | 0.18   | 1       |

| time B | leuko B | time D | leuko D |
|--------|---------|--------|---------|
| 0.30   | 1       | 0.41   | 1       |
| 0.23   | 1       | 0.18   | 1       |
| 6.23   | 1       | 0.19   | 1       |
| 0.23   | 1       | 0.16   | 1       |
| 0.47   | 1       | 0.20   | 1       |
| 0.38   | 1       | 1.26   | 1       |
| 0.24   | 1       | 0.18   | 1       |
| 0.22   | 1       | 0.18   | 1       |
| 0.27   | 1       | 0.18   | 1       |
| 0.22   | 1       | 0.18   | 1       |
| 0.21   | 1       | 0.20   | 1       |
| 5.92   | 1       | 0.20   | 1       |
| 0.26   | 1       | 0.19   | 1       |
| 0.22   | 1       | 0.17   | 1       |
| 0.32   | 1       | 0.18   | 1       |
| 0.24   | 1       | 0.20   | 1       |
| 0.20   | 1       | 0.26   | 1       |
| 4.57   | 1       | 0.21   | 1       |
| 0.25   | 1       | 0.23   | 1       |
| 0.23   | 1       | 0.18   | 1       |
| 0.19   | 1       | 0.20   | 1       |
| 2.18   | 1       | 1.28   | 1       |
| 0.25   | 1       | 0.26   | 1       |
| 0.21   | 1       | 0.20   | 1       |
| 6.48   | 1       | 0.17   | 1       |
| 0.24   | 1       | 0.19   | 1       |
| 0.23   | 1       | 0.18   | 1       |
| 0.20   | 1       | 0.19   | 1       |
| 0.24   | 1       | 0.75   | 1       |
| 0.22   | 1       | 0.19   | 1       |
| 0.22   | 1       | 0.21   | 1       |
| 4.22   | 1       | 0.21   | 1       |
| 0.20   | 1       | 0.62   | 1       |
| 0.30   | 1       | 0.21   | 1       |
| 0.22   | 1       | 0.22   | 1       |
| 0.19   | 1       | 0.20   | 1       |
| 4.36   | 1       | 0.19   | 1       |
| 0.30   | 1       | 1.04   | 1       |
| 5.25   | 1       | 0.19   | 1       |
| 0.25   | 1       | 0.20   | 1       |
| 0.22   | 1       | 0.20   | 1       |
| 0.33   | 1       | 0.18   | 1       |
| 0.19   | 1       | 0.21   | 1       |
| 3.91   | 1       | 0.91   | 1       |
| 0.23   | 1       | 0.23   | 1       |
| 0.34   | 1       | 0.20   | 1       |
| 4.10   | 1       | 0.19   | 1       |
| 0.25   | 1       | 0.38   | 1       |
| 0.27   | 1       | 0.22   | 1       |
| 0.71   | 1       | 0.23   | 1       |
| 0.24   | 1       | 0.59   | 1       |
| 0.22   | 1       | 0.19   | 1       |

| time B | leuko B | time D | leuko D |
|--------|---------|--------|---------|
| 3.89   | 1       | 0.23   | 1       |
| 0.29   | 1       | 0.19   | 1       |
| 0.25   | 1       | 0.21   | 1       |
| 0.21   | 1       | 0.19   | 1       |
| 6.73   | 1       | 0.20   | 1       |
| 0.27   | 1       | 0.19   | 1       |
| 0.23   | 1       | 0.21   | 1       |
| 0.23   | 1       | 0.22   | 1       |
| 0.22   | 1       | 0.22   | 1       |
| 0.20   | 1       | 0.21   | 1       |
| 0.24   | 1       | 0.23   | 1       |
| 4.17   | 1       | 0.25   | 1       |
| 3.07   | 1       | 0.21   | 1       |
| 0.26   | 1       | 0.53   | 1       |
| 2.82   | 1       | 0.37   | 1       |
| 8.44   | 1       | 0.25   | 1       |
| 0.24   | 1       | 0.36   | 1       |
| 0.24   | 1       | 0.25   | 1       |
| 1.62   | 1       | 0.26   | 1       |
| 0.27   | 1       | 0.25   | 1       |
| 0.23   | 1       | 0.24   | 1       |
| 2.01   | 1       | 0.23   | 1       |
| 0.25   | 1       | 0.22   | 1       |
| 0.25   | 1       | 0.31   | 1       |
| 0.20   | 1       | 0.22   | 1       |
| 5.39   | 1       | 0.22   | 1       |
| 0.25   | 1       | 0.20   | 1       |
| 0.26   | 1       | 0.48   | 1       |
| 10.57  | 1       | 0.23   | 1       |
| 0.28   | 1       | 0.45   | 1       |
| 0.23   | 1       | 0.31   | 1       |
| 0.22   | 1       | 0.32   | 1       |
| 4.38   | 1       | 0.31   | 1       |
| 0.24   | 1       | 0.47   | 1       |
| 0.25   | 1       | 6.76   | 1       |
| 0.23   | 1       | 0.28   | 1       |
| 0.74   | 1       | 0.22   | 1       |
| 5.22   | 1       | 0.23   | 1       |
| 0.26   | 1       | 4.45   | 1       |
| 2.73   | 1       | 0.21   | 1       |
| 0.27   | 1       | 0.23   | 1       |
| 2.35   | 1       | 0.21   | 1       |
| 0.31   | 1       | 0.29   | 1       |
| 0.23   | 1       | 0.29   | 1       |
| 0.23   | 1       | 0.24   | 1       |
| 0.23   | 1       | 0.22   | 1       |
| 0.21   | 1       | 3.58   | 1       |
| 5.08   | 1       | 0.29   | 1       |
| 0.27   | 1       | 0.25   | 1       |
| 0.24   | 1       | 0.19   | 1       |
| 0.26   | 1       | 0.95   | 1       |
| 0.58   | 1       | 0.37   | 1       |

| time B | leuko B | time D | leuko D |
|--------|---------|--------|---------|
| 3.51   | 1       | 0.24   | 1       |
| 0.25   | 1       | 0.13   | 1       |
| 0.25   | 1       | 0.20   | 1       |
| 1.28   | 1       | 0.22   | 1       |
| 2.76   | 1       | 0.18   | 1       |
| 0.23   | 1       | 0.18   | 1       |
| 0.25   | 1       | 0.21   | 1       |
| 0.23   | 1       | 1.92   | 1       |
| 0.23   | 1       | 0.40   | 1       |
| 0.24   | 1       | 0.22   | 1       |
| 0.22   | 1       | 0.46   | 1       |
| 3.15   | 1       | 0.38   | 1       |
| 0.29   | 1       | 0.39   | 1       |
| 4.17   | 1       | 0.19   | 1       |
| 2.79   | 1       | 0.20   | 1       |
| 0.26   | 1       | 0.16   | 1       |
| 3.47   | 1       | 0.20   | 1       |
| 0.26   | 1       | 0.19   | 1       |
| 3.24   | 1       | 0.19   | 1       |
| 4.24   | 1       | 0.19   | 1       |
| 0.25   | 1       | 2.02   | 1       |
| 0.22   | 1       | 0.39   | 1       |
| 3.97   | 1       | 0.22   | 1       |
| 0.27   | 1       | 0.20   | 1       |
| 0.24   | 1       | 0.22   | 1       |
| 0.22   | 1       | 0.16   | 1       |
| 1.21   | 1       | 0.14   | 1       |
| 0.25   | 1       | 0.23   | 1       |
| 0.23   | 1       | 0.20   | 1       |
| 0.20   | 1       | 0.14   | 1       |
| 4.25   | 1       | 0.20   | 1       |
| 0.25   | 1       | 0.18   | 1       |
| 0.23   | 1       | 0.93   | 1       |
| 7.02   | 1       | 0.35   | 1       |
| 5.48   | 1       | 0.18   | 1       |
| 0.26   | 1       | 0.18   | 1       |
| 0.26   | 1       | 0.17   | 1       |
| 0.24   | 1       | NA     | NA      |
| 0.56   | 1       | NA     | NA      |
| 0.26   | 1       | NA     | NA      |
| 0.18   | 1       | NA     | NA      |

## 1.2 A098

Table 2: Raw data of TBS A098.

| time<br>A | leuko<br>A | time<br>A | leuko<br>A | time<br>B | leuko<br>B | time<br>C | leuko<br>C | time<br>D | leuko<br>D | time<br>E | leuko<br>E |
|-----------|------------|-----------|------------|-----------|------------|-----------|------------|-----------|------------|-----------|------------|
| 0.00      | 1          | 0.00      | 0          | 0.00      | 0          | 0.00      | 1          | 0.00      | 1          | 0.00      | 1          |
| 0.29      | 1          | 0.22      | 0          | 2.27      | 1          | 0.21      | 1          | 0.21      | 1          | 0.26      | 1          |
| 0.22      | 1          | 17.10     | 1          | 0.30      | 1          | 0.29      | 1          | 0.22      | 1          | 0.38      | 1          |
| 0.20      | 1          | 0.25      | 1          | 0.84      | 1          | 0.22      | 1          | 1.67      | 1          | 0.27      | 1          |
| 0.21      | 1          | 3.53      | 1          | 0.28      | 1          | 0.48      | 1          | 0.21      | 1          | 0.62      | 1          |
| 0.19      | 1          | 0.21      | 1          | 0.24      | 1          | 0.26      | 1          | 0.55      | 1          | 18.21     | 1          |
| 0.20      | 1          | 2.66      | 1          | 0.20      | 1          | 0.42      | 1          | 0.19      | 1          | 0.56      | 1          |
| 5.96      | 1          | 0.25      | 1          | 1.82      | 1          | 0.62      | 1          | 0.47      | 1          | 0.27      | 1          |
| 6.03      | 1          | 7.51      | 1          | 0.27      | 1          | 16.46     | 1          | 0.18      | 1          | 0.27      | 1          |
| 0.22      | 1          | 0.25      | 1          | 0.23      | 1          | 0.18      | 1          | 0.18      | 1          | 0.31      | 1          |
| 0.17      | 1          | 0.23      | 1          | 0.33      | 1          | 0.22      | 1          | 0.40      | 1          | 14.07     | 1          |
| 0.16      | 1          | 0.25      | 1          | 0.25      | 1          | 0.26      | 1          | 0.23      | 1          | 0.28      | 1          |
| 0.17      | 1          | 15.23     | 1          | 0.22      | 1          | 0.22      | 1          | 0.33      | 1          | 22.03     | 1          |
| 0.17      | 1          | 0.21      | 1          | 0.21      | 1          | 3.19      | 1          | 0.61      | 1          | 0.30      | 1          |
| 1.22      | 1          | 0.19      | 1          | 0.22      | 1          | 0.18      | 1          | 1.28      | 1          | 11.09     | 1          |
| 0.21      | 1          | 0.18      | 1          | 6.72      | 1          | 0.21      | 1          | 0.24      | 1          | 0.24      | 1          |
| 0.32      | 1          | 0.23      | 1          | 0.27      | 1          | 0.27      | 1          | 0.22      | 1          | 0.40      | 1          |
| 1.63      | 1          | 2.83      | 1          | 0.24      | 1          | 3.27      | 1          | 0.25      | 1          | 0.25      | 1          |
| 0.22      | 1          | 0.21      | 1          | 0.20      | 1          | 0.24      | 1          | 0.30      | 1          | 0.31      | 1          |
| 0.84      | 1          | 0.19      | 1          | 0.55      | 1          | 0.22      | 1          | 1.48      | 0          | 0.32      | 1          |
| 1.44      | 1          | 0.18      | 1          | 0.24      | 1          | 0.21      | 1          | 1.78      | 0          | 14.18     | 1          |
| 0.20      | 1          | 0.19      | 1          | 0.21      | 1          | 0.20      | 1          | 0.77      | 0          | 0.27      | 1          |
| 0.21      | 1          | 0.19      | 1          | 0.21      | 1          | 0.23      | 1          | 1.91      | 0          | 0.25      | 1          |
| 0.18      | 1          | 0.18      | 1          | 0.47      | 1          | 0.21      | 1          | 5.38      | 1          | 0.39      | 1          |
| 0.21      | 1          | 0.21      | 1          | 0.22      | 1          | 0.27      | 1          | 0.20      | 1          | 0.28      | 1          |
| 0.23      | 1          | 0.14      | 1          | 0.95      | 1          | 2.39      | 1          | 0.22      | 1          | 0.26      | 1          |
| 1.56      | 1          | 0.27      | 1          | 0.26      | 1          | 0.22      | 1          | 0.17      | 1          | 3.35      | 0          |
| 0.23      | 1          | 4.09      | 1          | 0.69      | 1          | 0.23      | 1          | 0.65      | 1          | 7.08      | 1          |
| 0.30      | 1          | 0.26      | 1          | 0.22      | 1          | 0.21      | 1          | 0.21      | 1          | 0.32      | 1          |
| 0.18      | 1          | 0.18      | 1          | 7.08      | 1          | 0.21      | 1          | 0.22      | 1          | 2.61      | 0          |
| 0.18      | 1          | 0.11      | 1          | 0.25      | 1          | 0.20      | 1          | 0.64      | 1          | 8.94      | 1          |
| 0.13      | 1          | 0.22      | 1          | 0.25      | 1          | 0.32      | 1          | 0.41      | 1          | 0.28      | 1          |
| 0.26      | 1          | 0.18      | 1          | 1.25      | 1          | 0.21      | 1          | 0.24      | 1          | 0.38      | 1          |
| 1.59      | 1          | 0.17      | 1          | 0.30      | 1          | 0.20      | 1          | 0.26      | 1          | 0.30      | 1          |
| 0.22      | 1          | 0.32      | 1          | 0.33      | 1          | 0.48      | 1          | 0.39      | 1          | 15.35     | 1          |
| 0.17      | 1          | 0.19      | 1          | 0.55      | 1          | 2.42      | 1          | 0.27      | 1          | 0.30      | 1          |
| 0.16      | 1          | 0.13      | 1          | 0.26      | 1          | 0.18      | 1          | 0.30      | 1          | 21.64     | 1          |
| 0.21      | 1          | 0.18      | 1          | 0.26      | 1          | 0.20      | 1          | 0.61      | 1          | 0.35      | 1          |
| 1.72      | 1          | 2.02      | 1          | 7.72      | 0          | 0.53      | 1          | 0.87      | 1          | 0.32      | 1          |
| 2.16      | 1          | 0.22      | 1          | 4.61      | 1          | 0.20      | 1          | 11.21     | 1          | 0.28      | 1          |
| 0.20      | 1          | 0.31      | 1          | 0.26      | 1          | 0.23      | 1          | 0.22      | 1          | 12.42     | 1          |
| 0.17      | 1          | 0.17      | 1          | 0.34      | 1          | 0.32      | 1          | 0.21      | 1          | 0.26      | 1          |
| 0.19      | 1          | 0.20      | 1          | 0.79      | 1          | 0.59      | 1          | 0.19      | 1          | 0.26      | 1          |
| 0.15      | 1          | 0.18      | 1          | 0.67      | 1          | 1.98      | 1          | 0.22      | 1          | 0.28      | 1          |
| 2.75      | 1          | 0.23      | 1          | 0.25      | 1          | 0.20      | 1          | 0.20      | 1          | 0.37      | 1          |
| 5.99      | 1          | 0.12      | 1          | 0.23      | 1          | 0.05      | 1          | 0.21      | 1          | 0.25      | 1          |
| 1.83      | 1          | 0.29      | 1          | 0.22      | 1          | 0.21      | 1          | 0.18      | 1          | 0.25      | 1          |
| 0.21      | 1          | 1.88      | 1          | 0.20      | 1          | 0.22      | 1          | 0.23      | 1          | 12.93     | 1          |

| time<br>A | leuko<br>A | time<br>A | leuko<br>A | time<br>B | leuko<br>B | time<br>C | leuko<br>C | time<br>D | leuko<br>D | time<br>E | leuko<br>E |
|-----------|------------|-----------|------------|-----------|------------|-----------|------------|-----------|------------|-----------|------------|
| 0.44      | 1          | 3.62      | 1          | 8.30      | 0          | 0.19      | 1          | 0.17      | 1          | 0.24      | 1          |
| 6.81      | 1          | 0.26      | 1          | 1.15      | 1          | 0.22      | 1          | 0.22      | 1          | 0.29      | 1          |
| 0.27      | 1          | 0.18      | 1          | 0.26      | 1          | 3.54      | 1          | 0.20      | 1          | 0.25      | 1          |
| 1.04      | 1          | 0.21      | 1          | 0.25      | 1          | 0.20      | 1          | 0.47      | 1          | 0.28      | 1          |
| 2.93      | 1          | 0.20      | 1          | 5.15      | 1          | 0.20      | 1          | 8.75      | 0          | 0.26      | 1          |
| 0.23      | 1          | 0.18      | 1          | 0.26      | 1          | 0.23      | 1          | 0.51      | 1          | 0.24      | 1          |
| 0.20      | 1          | 0.19      | 1          | 0.23      | 1          | 0.32      | 1          | 0.21      | 1          | 10.31     | 0          |
| 0.30      | 1          | 1.82      | 1          | 0.23      | 1          | 0.41      | 1          | 0.22      | 1          | 0.45      | 0          |
| 0.18      | 1          | 3.57      | 1          | 7.51      | 1          | 2.21      | 1          | 0.23      | 1          | 16.99     | 1          |
| 2.68      | 1          | 6.65      | 1          | 0.32      | 1          | 0.26      | 1          | 0.21      | 1          | 0.29      | 1          |
| 0.23      | 1          | 8.11      | 1          | 1.18      | 1          | 0.24      | 1          | 0.19      | 1          | 0.27      | 1          |
| 0.18      | 1          | 2.87      | 1          | 0.30      | 1          | 0.21      | 1          | 2.24      | 1          | 0.32      | 1          |
| 0.23      | 1          | 0.26      | 1          | 0.25      | 1          | 0.24      | 1          | 0.21      | 1          | 0.01      | 1          |
| 0.21      | 1          | 0.88      | 1          | 0.24      | 1          | 0.21      | 1          | 0.20      | 1          | 0.29      | 1          |
| 0.20      | 1          | 2.43      | 1          | 0.48      | 1          | 0.21      | 1          | 0.21      | 1          | 0.29      | 1          |
| 2.87      | 1          | 0.27      | 1          | 0.29      | 1          | 0.21      | 1          | 0.20      | 1          | 0.36      | 1          |
| 0.25      | 1          | 0.21      | 1          | 0.23      | 1          | 0.20      | 1          | 0.26      | 1          | 0.37      | 1          |
| 0.25      | 1          | 0.21      | 1          | 0.24      | 1          | 2.81      | 1          | 0.21      | 1          | 12.10     | 1          |
| 1.70      | 1          | 2.22      | 1          | 1.76      | 0          | 0.22      | 1          | 0.39      | 1          | 0.25      | 1          |
| 0.22      | 1          | 0.24      | 1          | 6.39      | 1          | 0.21      | 1          | 0.29      | 1          | 0.28      | 1          |
| 0.22      | 1          | 0.20      | 1          | 0.27      | 1          | 0.22      | 1          | 0.35      | 1          | 0.28      | 1          |
| 0.22      | 1          | 0.18      | 1          | 0.57      | 1          | 0.24      | 1          | 0.31      | 1          | 0.57      | 1          |
| 0.21      | 1          | 0.12      | 1          | 0.26      | 1          | 0.24      | 1          | 0.39      | 1          | 0.32      | 1          |
| 0.21      | 1          | 0.25      | 1          | 1.59      | 1          | 0.20      | 1          | 8.28      | 1          | 0.31      | 1          |
| 0.20      | 1          | 0.29      | 1          | 0.27      | 1          | 2.13      | 1          | 0.18      | 1          | 0.34      | 1          |
| 1.70      | 1          | 5.21      | 1          | 0.25      | 1          | 0.23      | 1          | 0.21      | 1          | 5.40      | 0          |
| 0.26      | 1          | 0.24      | 1          | 0.25      | 1          | 0.21      | 1          | 0.55      | 1          | 4.71      | 1          |
| 0.20      | 1          | 1.11      | 1          | 3.26      | 1          | 0.32      | 1          | 0.30      | 1          | 0.28      | 1          |
| 0.17      | 1          | 2.70      | 1          | 0.26      | 1          | 0.26      | 1          | 0.20      | 1          | 0.30      | 1          |
| 0.22      | 1          | 0.24      | 1          | 0.24      | 1          | 0.23      | 1          | 0.23      | 1          | 0.25      | 1          |
| 1.74      | 1          | 3.40      | 1          | 0.22      | 1          | 0.21      | 1          | 0.56      | 1          | 9.64      | 0          |
| 0.20      | 1          | 0.24      | 1          | 0.33      | 1          | 0.21      | 1          | 0.27      | 1          | 13.23     | 1          |
| 2.77      | 1          | 0.18      | 1          | 0.21      | 1          | 0.29      | 1          | 0.31      | 1          | 0.31      | 1          |
| 0.21      | 1          | 2.04      | 1          | 0.21      | 1          | 0.21      | 1          | 0.26      | 1          | 4.02      | 0          |
| 0.18      | 1          | 0.24      | 1          | 0.21      | 1          | 2.69      | 1          | 0.26      | 1          | 5.76      | 1          |
| 0.19      | 1          | 0.18      | 1          | 5.85      | 1          | 0.20      | 1          | 0.27      | 1          | 3.20      | 1          |
| 0.17      | 1          | 0.19      | 1          | 0.25      | 1          | 0.23      | 1          | 0.25      | 1          | 0.28      | 1          |
| 0.17      | 1          | 0.12      | 1          | 0.25      | 1          | 0.19      | 1          | 0.29      | 1          | 0.27      | 1          |
| 0.18      | 1          | 0.22      | 1          | 0.21      | 1          | 0.19      | 1          | 12.42     | 1          | 10.92     | 1          |
| 2.15      | 1          | 0.23      | 1          | 0.23      | 1          | 0.20      | 1          | 0.22      | 1          | 0.26      | 1          |
| 0.22      | 1          | 0.22      | 1          | 0.81      | 1          | 0.20      | 1          | 0.24      | 1          | 0.24      | 1          |
| 0.16      | 1          | 0.33      | 1          | 0.28      | 1          | 0.20      | 1          | 0.19      | 1          | 0.24      | 1          |
| 0.19      | 1          | 2.37      | 1          | 0.18      | 1          | 0.30      | 1          | 0.23      | 1          | 0.34      | 1          |
| 2.60      | 1          | 0.21      | 1          | 0.23      | 1          | 0.23      | 1          | 0.23      | 1          | 0.27      | 1          |
| 0.24      | 1          | 0.19      | 1          | 0.29      | 1          | 0.21      | 1          | 0.21      | 1          | 0.25      | 1          |
| 0.19      | 1          | 0.19      | 1          | 0.21      | 1          | 0.29      | 1          | 0.22      | 1          | 21.90     | 1          |
| 0.28      | 1          | 0.24      | 1          | 0.20      | 1          | 2.41      | 1          | 0.21      | 1          | 0.26      | 1          |
| 2.58      | 1          | 4.76      | 1          | 5.88      | 1          | 0.18      | 1          | 0.19      | 1          | 0.25      | 1          |
| 0.23      | 1          | 0.31      | 1          | 0.27      | 1          | 0.07      | 1          | 0.22      | 1          | 0.29      | 1          |
| 0.17      | 1          | 0.21      | 1          | 0.23      | 1          | 0.15      | 1          | 1.93      | 0          | 0.25      | 1          |
| 0.27      | 1          | 0.17      | 1          | 1.24      | 1          | 0.22      | 1          | 3.60      | 0          | 0.31      | 1          |

| time<br>A | leuko<br>A | time<br>A | leuko<br>A | time<br>B | leuko<br>B | time<br>C | leuko<br>C | time<br>D | leuko<br>D | time<br>E | leuko<br>E |
|-----------|------------|-----------|------------|-----------|------------|-----------|------------|-----------|------------|-----------|------------|
| 18.43     | 1          | 0.22      | 1          | 0.28      | 1          | 0.20      | 1          | 0.49      | 1          | 0.29      | 1          |
| 0.19      | 1          | 5.01      | 1          | 0.22      | 1          | 0.26      | 1          | 0.25      | 1          | 3.46      | 0          |
| 0.21      | 1          | 0.22      | 1          | 0.30      | 1          | 0.24      | 1          | 0.22      | 1          | 8.49      | 1          |
| 0.21      | 1          | 0.20      | 1          | 0.24      | 1          | 0.20      | 1          | 0.23      | 1          | 0.28      | 1          |
| 7.07      | 1          | 0.20      | 1          | 0.19      | 1          | 0.22      | 1          | 0.22      | 1          | 0.29      | 1          |
| 5.95      | 1          | 1.92      | 1          | 0.21      | 1          | 5.55      | 1          | 0.20      | 1          | 13.72     | 1          |
| 0.88      | 1          | 0.24      | 1          | 0.36      | 1          | 0.23      | 1          | 0.20      | 1          | 0.24      | 1          |
| 1.74      | 1          | 0.21      | 1          | 7.90      | 1          | 0.86      | 1          | 11.72     | 1          | 0.25      | 1          |
| 0.22      | 1          | 0.18      | 1          | 0.27      | 1          | 0.31      | 1          | 0.20      | 1          | 0.29      | 1          |
| 0.20      | 1          | 0.19      | 1          | 0.24      | 1          | 0.23      | 1          | 0.48      | 1          | 0.27      | 1          |
| 0.21      | 1          | 0.18      | 1          | 0.23      | 1          | 2.60      | 1          | 0.22      | 1          | 9.65      | 1          |
| 0.16      | 1          | 0.18      | 1          | 0.23      | 1          | 0.20      | 1          | 0.40      | 1          | 0.24      | 1          |
| 0.18      | 1          | 0.19      | 1          | 0.43      | 1          | 0.23      | 1          | 0.22      | 1          | 0.25      | 1          |
| 4.28      | 0          | 2.54      | 1          | 0.96      | 1          | 0.42      | 1          | 0.56      | 0          | 0.24      | 1          |
| 7.03      | 1          | 0.25      | 1          | 0.25      | 1          | 0.22      | 1          | 0.71      | 1          | 0.19      | 1          |
| 0.26      | 1          | 0.19      | 1          | 0.22      | 1          | 0.27      | 1          | 0.42      | 1          | 0.50      | 0          |
| 0.19      | 1          | 0.24      | 1          | 0.32      | 1          | 0.23      | 1          | 0.08      | 0          | 4.45      | 1          |
| 0.20      | 1          | 0.30      | 1          | 0.22      | 1          | 0.25      | 1          | 0.27      | 1          | 0.27      | 1          |
| 0.17      | 1          | 0.20      | 1          | 0.88      | 1          | 1.53      | 1          | 0.25      | 1          | 0.24      | 1          |
| 0.20      | 1          | 0.17      | 1          | 0.25      | 1          | 5.30      | 1          | 0.25      | 1          | 0.26      | 1          |
| 0.16      | 1          | 0.22      | 1          | 15.84     | 1          | 0.19      | 1          | 1.17      | 1          | 0.25      | 1          |
| 5.03      | 1          | 0.17      | 1          | 0.26      | 1          | 0.01      | 1          | 0.26      | 1          | 0.24      | 1          |
| 0.24      | 1          | 0.20      | 1          | 0.24      | 1          | 0.03      | 1          | 0.30      | 1          | 0.25      | 1          |
| 0.22      | 1          | 0.20      | 1          | 0.21      | 1          | 0.14      | 1          | 8.13      | 1          | 0.25      | 1          |
| 0.20      | 1          | 0.20      | 1          | 0.51      | 1          | 0.18      | 1          | 0.21      | 1          | 0.27      | 1          |
| 0.22      | 1          | 0.19      | 1          | 0.24      | 1          | 0.18      | 1          | 0.91      | 1          | 0.25      | 1          |
| 0.90      | 0          | 1.77      | 1          | 0.83      | 1          | 0.29      | 1          | 0.24      | 1          | 0.30      | 1          |
| 0.29      | 0          | 0.24      | 1          | 0.24      | 1          | 0.21      | 1          | 0.13      | 1          | 5.24      | 0          |
| 1.76      | 0          | 0.32      | 1          | 0.50      | 1          | 3.83      | 1          | 0.18      | 1          | 13.11     | 1          |
| 2.83      | 1          | 0.18      | 1          | 0.24      | 1          | 0.24      | 1          | 11.08     | 1          | 0.27      | 1          |
| 0.24      | 1          | 0.20      | 1          | 0.34      | 1          | 0.07      | 1          | 0.19      | 1          | 0.27      | 1          |
| 0.21      | 1          | 0.16      | 1          | 0.22      | 1          | 0.12      | 1          | 0.35      | 1          | 7.82      | 0          |
| 0.17      | 1          | 0.16      | 1          | 0.21      | 1          | 0.07      | 1          | 0.55      | 1          | 4.48      | 1          |
| 0.24      | 1          | 4.41      | 0          | 0.22      | 1          | 1.23      | 1          | 0.21      | 1          | 0.26      | 1          |
| 0.24      | 1          | 16.61     | 1          | 0.31      | 1          | 0.19      | 1          | 0.26      | 1          | 0.25      | 1          |
| 5.13      | 1          | 0.21      | 1          | 0.21      | 1          | 0.07      | 1          | 0.41      | 1          | 0.26      | 1          |
| 3.56      | 1          | 0.19      | 1          | 0.22      | 1          | 0.12      | 1          | 0.21      | 1          | 0.27      | 1          |
| 0.96      | 1          | 0.16      | 1          | 0.20      | 1          | 0.06      | 1          | 0.34      | 1          | 0.26      | 1          |
| 2.51      | 1          | 0.17      | 1          | 0.27      | 1          | 0.13      | 1          | 0.26      | 1          | 0.24      | 1          |
| 0.25      | 1          | 0.17      | 1          | 0.21      | 1          | 0.93      | 1          | 0.30      | 1          | 19.38     | 1          |
| 0.19      | 1          | 0.23      | 1          | 0.29      | 1          | 0.21      | 1          | 14.81     | 0          | 0.32      | 1          |
| 0.17      | 1          | 2.39      | 1          | 0.20      | 1          | 0.20      | 1          | 3.58      | 1          | 0.32      | 1          |
| 0.19      | 1          | 0.24      | 1          | 0.22      | 1          | 0.22      | 1          | 3.70      | 1          | 35.28     | 1          |
| 0.19      | 1          | 0.18      | 1          | 0.20      | 1          | 0.07      | 1          | 0.18      | 1          | 0.98      | 1          |
| 0.17      | 1          | 0.17      | 1          | 9.45      | 0          | 0.12      | 1          | 0.17      | 1          | 4.42      | 1          |
| 2.55      | 1          | 0.21      | 1          | 6.51      | 1          | 0.20      | 1          | 0.25      | 1          | 0.36      | 1          |
| 0.32      | 1          | 0.22      | 1          | 0.24      | 1          | 3.22      | 1          | 0.26      | 1          | 7.17      | 1          |
| 0.27      | 1          | 0.18      | 1          | 0.23      | 1          | 0.23      | 1          | 0.25      | 1          | 0.62      | 1          |
| 3.67      | 1          | 0.16      | 1          | 0.22      | 1          | 0.21      | 1          | 0.23      | 1          | 3.93      | 1          |
| 0.34      | 1          | 2.74      | 1          | 0.22      | 1          | 0.20      | 1          | 8.45      | 1          | 0.25      | 1          |
| 0.22      | 1          | 0.25      | 1          | 0.39      | 1          | 0.24      | 1          | 0.21      | 1          | 10.63     | 1          |

| time<br>A | leuko<br>A | time<br>A | leuko<br>A | time<br>B | leuko<br>B | time<br>C | leuko<br>C | time<br>D | leuko<br>D | time<br>E | leuko<br>E |
|-----------|------------|-----------|------------|-----------|------------|-----------|------------|-----------|------------|-----------|------------|
| 0.20      | 1          | 0.22      | 1          | 0.22      | 1          | 0.19      | 1          | 0.57      | 1          | 0.26      | 1          |
| 0.18      | 1          | 0.13      | 1          | 0.95      | 1          | 0.21      | 1          | 0.21      | 1          | 0.29      | 1          |
| 1.94      | 0          | 0.27      | 1          | 0.22      | 1          | 2.26      | 1          | 0.65      | 1          | 0.41      | 1          |
| 6.69      | 1          | 0.20      | 1          | 0.22      | 1          | 0.19      | 1          | 0.19      | 1          | 0.35      | 1          |
| 0.32      | 1          | 0.17      | 1          | 0.20      | 1          | 0.21      | 1          | 0.29      | 1          | 0.25      | 1          |
| 4.72      | 1          | 0.18      | 1          | 0.27      | 1          | 0.19      | 1          | 0.29      | 1          | 0.24      | 1          |
| 0.42      | 1          | 0.30      | 0          | 0.24      | 1          | 0.22      | 1          | 0.17      | 1          | 4.93      | 1          |
| 0.23      | 1          | 3.30      | 1          | 6.02      | 0          | 0.22      | 1          | 0.20      | 1          | 0.29      | 1          |
| 0.22      | 1          | 0.24      | 1          | 0.63      | 0          | 0.21      | 1          | 0.27      | 1          | 0.28      | 1          |
| 0.21      | 1          | 0.18      | 1          | 8.16      | 1          | 0.23      | 1          | 0.22      | 1          | 10.71     | 1          |
| 2.68      | 1          | 0.22      | 1          | 0.28      | 1          | 0.25      | 1          | 0.17      | 1          | 0.27      | 1          |
| 0.23      | 1          | 0.32      | 1          | 0.25      | 1          | 1.39      | 1          | 1.80      | 1          | 0.27      | 1          |
| 0.22      | 1          | 1.02      | 0          | 0.22      | 1          | 0.20      | 1          | 17.27     | 1          | 0.24      | 1          |
| 0.19      | 1          | 3.23      | 1          | 0.44      | 1          | 0.24      | 1          | 0.19      | 1          | 6.90      | 1          |
| 0.19      | 1          | 0.24      | 1          | 0.25      | 1          | 0.22      | 1          | 0.17      | 1          | 0.22      | 1          |
| 0.20      | 1          | 0.28      | 1          | 0.22      | 1          | 1.54      | 1          | 0.20      | 1          | 0.59      | 1          |
| 3.88      | 1          | 0.33      | 1          | 0.20      | 1          | 0.22      | 1          | 0.26      | 1          | 0.23      | 1          |
| 0.22      | 1          | 0.66      | 1          | 0.33      | 1          | 0.22      | 1          | 0.16      | 1          | 0.70      | 1          |
| 0.21      | 1          | 0.22      | 1          | 0.20      | 1          | 0.19      | 1          | 0.21      | 1          | 0.57      | 0          |
| 0.18      | 1          | 0.19      | 1          | 3.31      | 1          | 0.21      | 1          | 0.19      | 1          | 5.43      | 1          |
| 0.20      | 1          | 0.18      | 1          | 0.27      | 1          | 0.20      | 1          | 0.25      | 1          | 0.27      | 1          |
| 0.17      | 1          | 0.19      | 1          | 0.23      | 1          | 0.26      | 1          | 0.38      | 1          | 0.23      | 1          |
| 0.21      | 1          | 0.18      | 1          | 0.52      | 1          | 0.17      | 1          | 0.20      | 1          | 0.26      | 1          |
| 3.35      | 1          | 4.94      | 1          | 0.27      | 1          | 0.20      | 1          | 0.24      | 1          | 3.68      | 0          |
| 0.30      | 1          | 0.27      | 1          | 0.23      | 1          | 1.62      | 1          | 0.19      | 1          | 6.66      | 1          |
| 0.80      | 1          | 0.21      | 1          | 0.52      | 1          | 0.21      | 1          | 0.23      | 1          | 0.28      | 1          |
| 0.49      | 0          | 0.17      | 1          | 0.24      | 1          | 0.18      | 1          | 0.24      | 1          | 0.27      | 1          |
| 0.32      | 0          | 0.19      | 1          | 0.39      | 1          | 0.20      | 1          | 0.19      | 1          | 0.86      | 0          |
| 0.40      | 0          | 0.18      | 1          | 0.25      | 1          | 2.71      | 1          | 15.33     | 0          | 5.16      | 1          |
| 4.54      | 1          | 0.21      | 1          | 0.24      | 1          | 0.23      | 1          | 0.76      | 0          | 0.30      | 1          |
| 0.75      | 1          | 0.19      | 1          | 0.24      | 1          | 0.21      | 1          | 0.80      | 1          | 0.22      | 1          |
| 0.41      | 1          | 3.12      | 1          | 0.23      | 1          | 0.42      | 1          | 0.21      | 1          | 0.26      | 1          |
| 0.32      | 1          | 0.28      | 1          | 9.67      | 0          | 1.44      | 1          | 0.49      | 1          | 0.44      | 1          |
| 4.58      | 1          | 0.19      | 1          | 2.56      | 1          | 2.44      | 1          | 0.21      | 1          | 0.31      | 1          |
| 0.22      | 1          | 0.22      | 1          | 0.28      | 1          | 0.21      | 1          | 0.22      | 1          | 0.25      | 1          |
| 0.22      | 1          | 4.78      | 1          | 0.25      | 1          | 0.38      | 1          | 0.27      | 1          | 7.52      | 1          |
| 0.19      | 1          | 1.97      | 1          | 0.12      | 1          | 2.36      | 1          | 1.24      | 1          | 0.27      | 1          |
| 0.17      | 1          | 0.22      | 1          | 2.25      | 1          | 0.21      | 1          | 0.87      | 1          | 0.88      | 1          |
| 0.19      | 1          | 0.20      | 1          | 0.23      | 1          | 0.18      | 1          | 2.94      | 1          | 0.31      | 1          |
| 2.22      | 0          | 0.17      | 1          | 0.13      | 1          | 0.22      | 1          | 0.22      | 1          | 0.25      | 1          |
| 2.76      | 1          | 0.19      | 1          | 10.06     | 1          | 1.70      | 1          | 0.22      | 1          | 11.57     | 1          |
| 0.69      | 1          | 2.71      | 1          | 0.23      | 1          | 0.21      | 1          | 0.22      | 1          | 0.25      | 1          |
| 3.47      | 1          | 0.20      | 1          | 0.83      | 1          | 0.20      | 1          | 0.20      | 1          | 0.28      | 1          |
| 0.25      | 1          | 5.43      | 1          | 0.24      | 1          | 1.14      | 1          | 0.21      | 1          | 0.52      | 1          |
| 0.28      | 1          | 0.25      | 1          | 0.21      | 1          | 0.21      | 1          | 0.30      | 1          | 0.25      | 1          |
| 0.57      | 1          | 0.23      | 1          | 0.22      | 1          | 0.21      | 1          | 0.21      | 1          | 0.24      | 1          |
| 0.25      | 1          | 3.54      | 0          | 0.34      | 1          | 0.19      | 1          | 0.17      | 1          | 0.24      | 1          |
| 0.22      | 1          | 7.62      | 1          | 0.22      | 1          | 0.20      | 1          | 0.20      | 1          | 6.18      | 0          |
| 1.94      | 1          | 0.21      | 1          | 0.22      | 1          | 0.87      | 1          | 0.19      | 1          | 3.79      | 1          |
| 11.30     | 1          | 0.39      | 1          | 0.22      | 1          | 0.22      | 1          | 4.01      | 0          | 0.27      | 1          |
| 0.25      | 1          | 1.81      | 0          | 0.20      | 1          | 0.24      | 1          | 0.70      | 1          | 0.43      | 1          |



| time<br>A | leuko<br>A | time<br>A | leuko<br>A | time<br>B | leuko<br>B | time<br>C | leuko<br>C | time<br>D | leuko<br>D | time<br>E | leuko<br>E |
|-----------|------------|-----------|------------|-----------|------------|-----------|------------|-----------|------------|-----------|------------|
| 0.20      | 1          | 5.27      | 1          | 0.26      | 1          | 0.26      | 1          | 0.20      | 1          | 0.26      | 1          |
| 0.21      | 1          | 0.23      | 1          | 0.19      | 1          | 0.22      | 1          | 0.18      | 1          | 0.27      | 1          |
| 5.13      | 0          | 0.38      | 0          | 0.19      | 1          | 2.82      | 1          | 0.24      | 1          | 0.26      | 1          |
| 0.37      | 1          | 0.19      | 0          | 0.19      | 1          | 0.21      | 1          | 0.64      | 1          | 0.27      | 1          |
| 0.27      | 1          | 6.09      | 1          | 6.76      | 1          | 0.25      | 1          | 0.20      | 1          | 16.09     | 1          |
| 0.22      | 1          | 0.22      | 1          | 0.24      | 1          | 1.77      | 1          | 0.19      | 1          | 0.24      | 1          |
| 0.20      | 1          | 0.22      | 1          | 0.23      | 1          | 0.20      | 1          | 0.25      | 1          | 0.24      | 1          |
| 0.22      | 1          | 0.20      | 1          | 0.20      | 1          | 0.18      | 1          | 0.19      | 1          | 0.23      | 1          |
| 3.24      | 1          | 0.18      | 1          | 0.75      | 1          | 0.25      | 1          | 0.82      | 1          | 0.38      | 1          |
| 0.27      | 1          | 0.31      | 0          | 0.23      | 1          | 0.19      | 1          | 0.24      | 1          | 0.24      | 1          |
| 0.19      | 1          | 1.12      | 0          | 0.37      | 1          | 0.21      | 1          | 0.25      | 1          | 11.13     | 1          |
| 0.47      | 0          | 3.22      | 1          | 0.19      | 1          | 0.17      | 1          | 13.92     | 1          | 0.26      | 1          |
| NA        | NA         | 0.20      | 1          | 19.38     | 1          | 1.07      | 1          | 0.21      | 1          | 0.26      | 1          |
| NA        | NA         | 0.19      | 1          | 0.25      | 1          | 1.27      | 1          | 0.21      | 1          | 0.24      | 1          |
| NA        | NA         | 0.17      | 1          | 0.21      | 1          | 0.22      | 1          | 0.21      | 1          | 0.22      | 1          |
| NA        | NA         | 0.17      | 1          | 0.20      | 1          | 0.22      | 1          | 1.04      | 0          | 0.23      | 1          |
| NA        | NA         | 0.18      | 1          | 0.19      | 1          | 0.23      | 1          | 0.85      | 1          | 0.25      | 1          |
| NA        | NA         | NA        | NA         | 0.16      | 1          | 0.21      | 1          | 0.19      | 1          | 0.67      | 0          |
| NA        | NA         | NA        | NA         | 4.84      | 1          | 0.57      | 1          | 2.47      | 1          | NA        | NA         |
| NA        | NA         | NA        | NA         | 0.25      | 1          | 0.21      | 1          | 0.21      | 1          | NA        | NA         |
| NA        | NA         | NA        | NA         | 0.23      | 1          | 0.08      | 1          | 0.48      | 0          | NA        | NA         |
| NA        | NA         | NA        | NA         | 0.20      | 1          | 0.12      | 1          | 0.32      | 1          | NA        | NA         |
| NA        | NA         | NA        | NA         | 0.24      | 1          | 0.20      | 1          | 0.44      | 1          | NA        | NA         |
| NA        | NA         | NA        | NA         | 0.19      | 1          | 0.19      | 1          | 0.36      | 1          | NA        | NA         |
| NA        | NA         | NA        | NA         | 1.66      | 0          | 2.03      | 1          | 0.21      | 1          | NA        | NA         |
| NA        | NA         | NA        | NA         | 4.38      | 1          | 0.20      | 1          | 0.22      | 1          | NA        | NA         |
| NA        | NA         | NA        | NA         | 0.27      | 1          | 1.94      | 1          | 0.19      | 1          | NA        | NA         |
| NA        | NA         | NA        | NA         | 0.24      | 1          | 0.20      | 1          | 0.21      | 1          | NA        | NA         |
| NA        | NA         | NA        | NA         | 0.23      | 1          | 0.18      | 1          | 0.19      | 1          | NA        | NA         |
| NA        | NA         | NA        | NA         | 5.70      | 1          | 0.19      | 1          | 0.18      | 1          | NA        | NA         |
| NA        | NA         | NA        | NA         | 0.24      | 1          | 2.04      | 1          | 0.20      | 1          | NA        | NA         |
| NA        | NA         | NA        | NA         | 0.22      | 1          | 0.19      | 1          | NA        | NA         | NA        | NA         |
| NA        | NA         | NA        | NA         | 0.21      | 1          | 0.20      | 1          | NA        | NA         | NA        | NA         |
| NA        | NA         | NA        | NA         | 4.76      | 1          | 0.21      | 1          | NA        | NA         | NA        | NA         |
| NA        | NA         | NA        | NA         | 0.25      | 1          | 1.29      | 1          | NA        | NA         | NA        | NA         |
| NA        | NA         | NA        | NA         | 0.23      | 1          | 0.21      | 1          | NA        | NA         | NA        | NA         |
| NA        | NA         | NA        | NA         | 0.19      | 1          | 0.21      | 1          | NA        | NA         | NA        | NA         |
| NA        | NA         | NA        | NA         | 0.21      | 1          | 0.22      | 1          | NA        | NA         | NA        | NA         |
| NA        | NA         | NA        | NA         | 0.20      | 1          | 0.20      | 1          | NA        | NA         | NA        | NA         |
| NA        | NA         | NA        | NA         | 3.50      | 1          | 0.18      | 1          | NA        | NA         | NA        | NA         |
| NA        | NA         | NA        | NA         | 0.22      | 1          | 0.22      | 1          | NA        | NA         | NA        | NA         |
| NA        | NA         | NA        | NA         | 0.57      | 1          | 0.23      | 1          | NA        | NA         | NA        | NA         |
| NA        | NA         | NA        | NA         | 0.19      | 1          | 0.39      | 1          | NA        | NA         | NA        | NA         |
| NA        | NA         | NA        | NA         | 0.29      | 1          | 0.61      | 1          | NA        | NA         | NA        | NA         |
| NA        | NA         | NA        | NA         | 0.22      | 1          | 6.04      | 1          | NA        | NA         | NA        | NA         |
| NA        | NA         | NA        | NA         | 0.19      | 1          | 0.25      | 1          | NA        | NA         | NA        | NA         |
| NA        | NA         | NA        | NA         | 0.20      | 1          | 0.23      | 1          | NA        | NA         | NA        | NA         |
| NA        | NA         | NA        | NA         | 5.61      | 1          | 0.09      | 1          | NA        | NA         | NA        | NA         |
| NA        | NA         | NA        | NA         | 0.24      | 1          | 0.19      | 1          | NA        | NA         | NA        | NA         |
| NA        | NA         | NA        | NA         | 0.23      | 1          | 0.56      | 1          | NA        | NA         | NA        | NA         |
| NA        | NA         | NA        | NA         | 0.21      | 1          | 0.21      | 1          | NA        | NA         | NA        | NA         |

| time<br>A | leuko<br>A | time<br>A | leuko<br>A | time<br>B | leuko<br>B | time<br>C | leuko<br>C | time<br>D | leuko<br>D | time<br>E | leuko<br>E |
|-----------|------------|-----------|------------|-----------|------------|-----------|------------|-----------|------------|-----------|------------|
| NA        | NA         | NA        | NA         | 0.57      | 1          | 0.95      | 1          | NA        | NA         | NA        | NA         |
| NA        | NA         | NA        | NA         | 0.25      | 1          | 0.22      | 1          | NA        | NA         | NA        | NA         |
| NA        | NA         | NA        | NA         | 0.32      | 1          | 0.24      | 1          | NA        | NA         | NA        | NA         |
| NA        | NA         | NA        | NA         | 0.22      | 1          | 0.24      | 1          | NA        | NA         | NA        | NA         |
| NA        | NA         | NA        | NA         | 6.49      | 1          | 0.23      | 1          | NA        | NA         | NA        | NA         |
| NA        | NA         | NA        | NA         | 0.26      | 1          | 0.26      | 1          | NA        | NA         | NA        | NA         |
| NA        | NA         | NA        | NA         | 0.23      | 1          | 0.47      | 1          | NA        | NA         | NA        | NA         |
| NA        | NA         | NA        | NA         | 0.21      | 1          | 1.61      | 1          | NA        | NA         | NA        | NA         |
| NA        | NA         | NA        | NA         | 0.42      | 1          | 0.22      | 1          | NA        | NA         | NA        | NA         |
| NA        | NA         | NA        | NA         | 0.22      | 1          | 0.23      | 1          | NA        | NA         | NA        | NA         |
| NA        | NA         | NA        | NA         | 3.39      | 1          | 0.32      | 1          | NA        | NA         | NA        | NA         |
| NA        | NA         | NA        | NA         | 0.24      | 1          | 0.37      | 1          | NA        | NA         | NA        | NA         |
| NA        | NA         | NA        | NA         | 0.55      | 1          | 0.19      | 1          | NA        | NA         | NA        | NA         |
| NA        | NA         | NA        | NA         | 0.22      | 1          | 0.21      | 1          | NA        | NA         | NA        | NA         |
| NA        | NA         | NA        | NA         | 0.55      | 1          | 0.29      | 1          | NA        | NA         | NA        | NA         |
| NA        | NA         | NA        | NA         | 0.19      | 1          | 0.32      | 1          | NA        | NA         | NA        | NA         |
| NA        | NA         | NA        | NA         | 3.20      | 0          | 2.71      | 1          | NA        | NA         | NA        | NA         |
| NA        | NA         | NA        | NA         | 3.01      | 1          | 0.19      | 1          | NA        | NA         | NA        | NA         |
| NA        | NA         | NA        | NA         | 3.58      | 0          | 0.22      | 1          | NA        | NA         | NA        | NA         |
| NA        | NA         | NA        | NA         | 0.92      | 1          | 0.20      | 1          | NA        | NA         | NA        | NA         |
| NA        | NA         | NA        | NA         | 0.28      | 1          | 0.21      | 1          | NA        | NA         | NA        | NA         |
| NA        | NA         | NA        | NA         | 0.22      | 1          | 0.22      | 1          | NA        | NA         | NA        | NA         |
| NA        | NA         | NA        | NA         | 0.62      | 1          | 0.31      | 1          | NA        | NA         | NA        | NA         |
| NA        | NA         | NA        | NA         | 0.25      | 1          | 0.23      | 1          | NA        | NA         | NA        | NA         |
| NA        | NA         | NA        | NA         | 0.22      | 1          | 0.22      | 1          | NA        | NA         | NA        | NA         |
| NA        | NA         | NA        | NA         | 0.49      | 1          | 0.08      | 1          | NA        | NA         | NA        | NA         |
| NA        | NA         | NA        | NA         | 0.25      | 1          | 0.20      | 1          | NA        | NA         | NA        | NA         |
| NA        | NA         | NA        | NA         | 3.74      | 1          | 0.29      | 1          | NA        | NA         | NA        | NA         |
| NA        | NA         | NA        | NA         | 0.24      | 1          | 0.11      | 1          | NA        | NA         | NA        | NA         |
| NA        | NA         | NA        | NA         | 0.25      | 1          | 0.15      | 1          | NA        | NA         | NA        | NA         |
| NA        | NA         | NA        | NA         | 0.22      | 1          | 0.21      | 1          | NA        | NA         | NA        | NA         |
| NA        | NA         | NA        | NA         | 6.48      | 1          | 0.19      | 1          | NA        | NA         | NA        | NA         |
| NA        | NA         | NA        | NA         | 0.27      | 1          | 1.70      | 1          | NA        | NA         | NA        | NA         |
| NA        | NA         | NA        | NA         | 0.23      | 1          | 0.07      | 1          | NA        | NA         | NA        | NA         |
| NA        | NA         | NA        | NA         | 0.22      | 1          | 0.10      | 1          | NA        | NA         | NA        | NA         |
| NA        | NA         | NA        | NA         | 0.27      | 1          | 0.22      | 1          | NA        | NA         | NA        | NA         |
| NA        | NA         | NA        | NA         | 0.22      | 1          | 0.26      | 1          | NA        | NA         | NA        | NA         |
| NA        | NA         | NA        | NA         | 0.21      | 1          | 0.24      | 1          | NA        | NA         | NA        | NA         |
| NA        | NA         | NA        | NA         | 0.20      | 1          | 0.21      | 1          | NA        | NA         | NA        | NA         |
| NA        | NA         | NA        | NA         | 0.26      | 1          | 0.22      | 1          | NA        | NA         | NA        | NA         |
| NA        | NA         | NA        | NA         | 5.00      | 1          | 0.42      | 1          | NA        | NA         | NA        | NA         |
| NA        | NA         | NA        | NA         | 0.25      | 1          | 0.20      | 1          | NA        | NA         | NA        | NA         |
| NA        | NA         | NA        | NA         | 0.73      | 1          | 0.98      | 1          | NA        | NA         | NA        | NA         |
| NA        | NA         | NA        | NA         | 0.22      | 1          | 0.23      | 1          | NA        | NA         | NA        | NA         |
| NA        | NA         | NA        | NA         | 3.27      | 1          | 0.21      | 1          | NA        | NA         | NA        | NA         |
| NA        | NA         | NA        | NA         | 0.25      | 1          | 0.21      | 1          | NA        | NA         | NA        | NA         |
| NA        | NA         | NA        | NA         | 0.24      | 1          | 0.20      | 1          | NA        | NA         | NA        | NA         |
| NA        | NA         | NA        | NA         | 0.20      | 1          | 0.22      | 1          | NA        | NA         | NA        | NA         |
| NA        | NA         | NA        | NA         | 0.20      | 1          | 0.36      | 1          | NA        | NA         | NA        | NA         |
| NA        | NA         | NA        | NA         | 10.02     | 1          | 0.07      | 1          | NA        | NA         | NA        | NA         |
| NA        | NA         | NA        | NA         | 0.27      | 1          | 0.14      | 1          | NA        | NA         | NA        | NA         |

| time<br>A | leuko<br>A | time<br>A | leuko<br>A | time<br>B | leuko<br>B | time<br>C | leuko<br>C | time<br>D | leuko<br>D | time<br>E | leuko<br>E |
|-----------|------------|-----------|------------|-----------|------------|-----------|------------|-----------|------------|-----------|------------|
| NA        | NA         | NA        | NA         | 0.23      | 1          | 0.17      | 1          | NA        | NA         | NA        | NA         |
| NA        | NA         | NA        | NA         | 0.28      | 1          | 1.87      | 1          | NA        | NA         | NA        | NA         |
| NA        | NA         | NA        | NA         | 0.19      | 1          | 0.23      | 1          | NA        | NA         | NA        | NA         |
| NA        | NA         | NA        | NA         | 0.20      | 1          | 0.22      | 1          | NA        | NA         | NA        | NA         |
| NA        | NA         | NA        | NA         | 0.20      | 1          | 0.23      | 1          | NA        | NA         | NA        | NA         |
| NA        | NA         | NA        | NA         | 5.65      | 1          | 0.29      | 1          | NA        | NA         | NA        | NA         |
| NA        | NA         | NA        | NA         | 0.25      | 1          | 0.18      | 1          | NA        | NA         | NA        | NA         |
| NA        | NA         | NA        | NA         | 0.25      | 1          | 0.21      | 1          | NA        | NA         | NA        | NA         |
| NA        | NA         | NA        | NA         | 0.22      | 1          | 0.23      | 1          | NA        | NA         | NA        | NA         |
| NA        | NA         | NA        | NA         | 5.56      | 1          | 0.25      | 1          | NA        | NA         | NA        | NA         |
| NA        | NA         | NA        | NA         | 0.29      | 1          | 0.21      | 1          | NA        | NA         | NA        | NA         |
| NA        | NA         | NA        | NA         | 0.24      | 1          | 0.35      | 1          | NA        | NA         | NA        | NA         |
| NA        | NA         | NA        | NA         | 0.23      | 1          | 0.23      | 1          | NA        | NA         | NA        | NA         |
| NA        | NA         | NA        | NA         | 0.22      | 1          | 0.06      | 1          | NA        | NA         | NA        | NA         |
| NA        | NA         | NA        | NA         | 3.92      | 1          | 0.12      | 1          | NA        | NA         | NA        | NA         |
| NA        | NA         | NA        | NA         | 0.24      | 1          | 0.09      | 1          | NA        | NA         | NA        | NA         |
| NA        | NA         | NA        | NA         | 0.24      | 1          | 0.10      | 1          | NA        | NA         | NA        | NA         |
| NA        | NA         | NA        | NA         | 0.22      | 1          | 0.08      | 1          | NA        | NA         | NA        | NA         |
| NA        | NA         | NA        | NA         | 0.22      | 1          | 1.34      | 1          | NA        | NA         | NA        | NA         |
| NA        | NA         | NA        | NA         | 0.18      | 1          | 0.21      | 1          | NA        | NA         | NA        | NA         |
| NA        | NA         | NA        | NA         | 3.43      | 0          | 0.08      | 1          | NA        | NA         | NA        | NA         |
| NA        | NA         | NA        | NA         | 2.37      | 1          | 0.10      | 1          | NA        | NA         | NA        | NA         |
| NA        | NA         | NA        | NA         | 0.31      | 1          | 0.25      | 1          | NA        | NA         | NA        | NA         |
| NA        | NA         | NA        | NA         | 0.22      | 1          | 0.08      | 1          | NA        | NA         | NA        | NA         |
| NA        | NA         | NA        | NA         | 0.20      | 1          | 0.25      | 1          | NA        | NA         | NA        | NA         |
| NA        | NA         | NA        | NA         | 4.47      | 1          | 0.09      | 1          | NA        | NA         | NA        | NA         |
| NA        | NA         | NA        | NA         | 0.25      | 1          | 0.12      | 1          | NA        | NA         | NA        | NA         |
| NA        | NA         | NA        | NA         | 0.22      | 1          | 0.09      | 1          | NA        | NA         | NA        | NA         |
| NA        | NA         | NA        | NA         | 0.21      | 1          | 0.97      | 1          | NA        | NA         | NA        | NA         |
| NA        | NA         | NA        | NA         | 3.23      | 1          | 0.09      | 1          | NA        | NA         | NA        | NA         |
| NA        | NA         | NA        | NA         | 0.26      | 1          | 0.12      | 1          | NA        | NA         | NA        | NA         |
| NA        | NA         | NA        | NA         | 0.23      | 1          | 0.22      | 1          | NA        | NA         | NA        | NA         |
| NA        | NA         | NA        | NA         | 0.22      | 1          | 0.30      | 1          | NA        | NA         | NA        | NA         |
| NA        | NA         | NA        | NA         | 0.20      | 1          | 0.23      | 1          | NA        | NA         | NA        | NA         |
| NA        | NA         | NA        | NA         | 0.19      | 1          | 0.09      | 1          | NA        | NA         | NA        | NA         |
| NA        | NA         | NA        | NA         | 0.22      | 1          | 0.27      | 1          | NA        | NA         | NA        | NA         |
| NA        | NA         | NA        | NA         | 0.20      | 1          | 0.21      | 1          | NA        | NA         | NA        | NA         |
| NA        | NA         | NA        | NA         | 4.41      | 1          | 1.18      | 1          | NA        | NA         | NA        | NA         |
| NA        | NA         | NA        | NA         | 0.24      | 1          | 0.22      | 1          | NA        | NA         | NA        | NA         |
| NA        | NA         | NA        | NA         | 0.21      | 1          | 0.08      | 1          | NA        | NA         | NA        | NA         |
| NA        | NA         | NA        | NA         | 0.22      | 1          | 0.10      | 1          | NA        | NA         | NA        | NA         |
| NA        | NA         | NA        | NA         | 0.20      | 1          | 0.23      | 1          | NA        | NA         | NA        | NA         |
| NA        | NA         | NA        | NA         | 0.19      | 1          | 0.21      | 1          | NA        | NA         | NA        | NA         |
| NA        | NA         | NA        | NA         | 5.74      | 1          | 0.21      | 1          | NA        | NA         | NA        | NA         |
| NA        | NA         | NA        | NA         | 0.28      | 1          | 0.21      | 1          | NA        | NA         | NA        | NA         |
| NA        | NA         | NA        | NA         | 0.23      | 1          | 0.30      | 1          | NA        | NA         | NA        | NA         |
| NA        | NA         | NA        | NA         | 0.21      | 1          | 0.22      | 1          | NA        | NA         | NA        | NA         |
| NA        | NA         | NA        | NA         | 8.07      | 1          | 0.95      | 1          | NA        | NA         | NA        | NA         |
| NA        | NA         | NA        | NA         | 0.22      | 1          | 0.23      | 1          | NA        | NA         | NA        | NA         |
| NA        | NA         | NA        | NA         | 0.19      | 1          | 0.23      | 1          | NA        | NA         | NA        | NA         |
| NA        | NA         | NA        | NA         | 0.23      | 1          | 0.37      | 1          | NA        | NA         | NA        | NA         |

| time<br>A | leuko<br>A | time<br>A | leuko<br>A | time<br>B | leuko<br>B | time<br>C | leuko<br>C | time<br>D | leuko<br>D | time<br>E | leuko<br>E |
|-----------|------------|-----------|------------|-----------|------------|-----------|------------|-----------|------------|-----------|------------|
| NA        | NA         | NA        | NA         | 0.18      | 1          | 0.45      | 1          | NA        | NA         | NA        | NA         |
| NA        | NA         | NA        | NA         | 0.20      | 1          | 0.43      | 1          | NA        | NA         | NA        | NA         |
| NA        | NA         | NA        | NA         | 4.10      | 1          | 0.22      | 1          | NA        | NA         | NA        | NA         |
| NA        | NA         | NA        | NA         | 0.25      | 1          | 2.04      | 1          | NA        | NA         | NA        | NA         |
| NA        | NA         | NA        | NA         | 0.21      | 1          | 0.20      | 1          | NA        | NA         | NA        | NA         |
| NA        | NA         | NA        | NA         | 0.31      | 1          | 0.29      | 1          | NA        | NA         | NA        | NA         |
| NA        | NA         | NA        | NA         | 0.20      | 1          | 0.31      | 1          | NA        | NA         | NA        | NA         |
| NA        | NA         | NA        | NA         | 4.71      | 1          | 0.25      | 1          | NA        | NA         | NA        | NA         |
| NA        | NA         | NA        | NA         | 0.24      | 1          | 0.33      | 1          | NA        | NA         | NA        | NA         |
| NA        | NA         | NA        | NA         | 0.19      | 1          | 0.62      | 1          | NA        | NA         | NA        | NA         |
| NA        | NA         | NA        | NA         | 0.18      | 1          | 0.26      | 1          | NA        | NA         | NA        | NA         |
| NA        | NA         | NA        | NA         | 8.80      | 1          | 0.22      | 1          | NA        | NA         | NA        | NA         |
| NA        | NA         | NA        | NA         | 0.24      | 1          | 0.24      | 1          | NA        | NA         | NA        | NA         |
| NA        | NA         | NA        | NA         | 0.20      | 1          | 3.74      | 1          | NA        | NA         | NA        | NA         |
| NA        | NA         | NA        | NA         | 0.20      | 1          | 0.20      | 1          | NA        | NA         | NA        | NA         |
| NA        | NA         | NA        | NA         | 0.24      | 1          | 0.07      | 1          | NA        | NA         | NA        | NA         |
| NA        | NA         | NA        | NA         | 0.19      | 1          | 0.08      | 1          | NA        | NA         | NA        | NA         |
| NA        | NA         | NA        | NA         | 4.36      | 1          | 0.06      | 1          | NA        | NA         | NA        | NA         |
| NA        | NA         | NA        | NA         | 0.25      | 1          | 0.14      | 1          | NA        | NA         | NA        | NA         |
| NA        | NA         | NA        | NA         | 0.22      | 1          | 0.22      | 1          | NA        | NA         | NA        | NA         |
| NA        | NA         | NA        | NA         | 0.32      | 1          | 0.07      | 1          | NA        | NA         | NA        | NA         |
| NA        | NA         | NA        | NA         | 0.21      | 1          | 0.11      | 1          | NA        | NA         | NA        | NA         |
| NA        | NA         | NA        | NA         | 0.47      | 1          | 0.08      | 1          | NA        | NA         | NA        | NA         |
| NA        | NA         | NA        | NA         | 0.24      | 1          | 0.11      | 1          | NA        | NA         | NA        | NA         |
| NA        | NA         | NA        | NA         | 0.20      | 1          | 0.21      | 1          | NA        | NA         | NA        | NA         |
| NA        | NA         | NA        | NA         | 0.22      | 1          | 0.43      | 1          | NA        | NA         | NA        | NA         |
| NA        | NA         | NA        | NA         | 3.82      | 1          | 0.22      | 1          | NA        | NA         | NA        | NA         |
| NA        | NA         | NA        | NA         | 0.24      | 1          | 0.20      | 1          | NA        | NA         | NA        | NA         |
| NA        | NA         | NA        | NA         | 0.22      | 1          | 0.25      | 1          | NA        | NA         | NA        | NA         |
| NA        | NA         | NA        | NA         | 0.28      | 1          | 0.21      | 1          | NA        | NA         | NA        | NA         |
| NA        | NA         | NA        | NA         | 0.20      | 1          | 1.12      | 1          | NA        | NA         | NA        | NA         |
| NA        | NA         | NA        | NA         | 6.36      | 0          | 0.06      | 1          | NA        | NA         | NA        | NA         |
| NA        | NA         | NA        | NA         | 1.27      | 1          | 0.10      | 1          | NA        | NA         | NA        | NA         |
| NA        | NA         | NA        | NA         | 0.25      | 1          | 0.21      | 1          | NA        | NA         | NA        | NA         |
| NA        | NA         | NA        | NA         | 0.23      | 1          | 0.42      | 1          | NA        | NA         | NA        | NA         |
| NA        | NA         | NA        | NA         | 3.70      | 0          | 0.08      | 1          | NA        | NA         | NA        | NA         |
| NA        | NA         | NA        | NA         | 0.69      | 1          | 0.11      | 1          | NA        | NA         | NA        | NA         |
| NA        | NA         | NA        | NA         | 5.31      | 1          | 0.07      | 1          | NA        | NA         | NA        | NA         |
| NA        | NA         | NA        | NA         | 0.25      | 1          | 0.07      | 1          | NA        | NA         | NA        | NA         |
| NA        | NA         | NA        | NA         | 0.21      | 1          | 0.07      | 1          | NA        | NA         | NA        | NA         |
| NA        | NA         | NA        | NA         | 5.45      | 1          | 0.15      | 1          | NA        | NA         | NA        | NA         |
| NA        | NA         | NA        | NA         | 0.22      | 1          | 0.08      | 1          | NA        | NA         | NA        | NA         |
| NA        | NA         | NA        | NA         | 3.55      | 1          | 0.10      | 1          | NA        | NA         | NA        | NA         |
| NA        | NA         | NA        | NA         | 4.90      | 1          | 0.09      | 1          | NA        | NA         | NA        | NA         |
| NA        | NA         | NA        | NA         | 0.23      | 1          | 2.59      | 1          | NA        | NA         | NA        | NA         |
| NA        | NA         | NA        | NA         | 0.23      | 1          | 0.20      | 1          | NA        | NA         | NA        | NA         |
| NA        | NA         | NA        | NA         | 0.18      | 1          | 0.24      | 1          | NA        | NA         | NA        | NA         |
| NA        | NA         | NA        | NA         | 3.53      | 1          | 0.06      | 1          | NA        | NA         | NA        | NA         |
| NA        | NA         | NA        | NA         | 0.22      | 1          | 0.11      | 1          | NA        | NA         | NA        | NA         |
| NA        | NA         | NA        | NA         | 2.06      | 1          | 0.23      | 1          | NA        | NA         | NA        | NA         |
| NA        | NA         | NA        | NA         | 0.24      | 1          | 0.08      | 1          | NA        | NA         | NA        | NA         |

| time<br>A | leuko<br>A | time<br>A | leuko<br>A | time<br>B | leuko<br>B | time<br>C | leuko<br>C | time<br>D | leuko<br>D | time<br>E | leuko<br>E |
|-----------|------------|-----------|------------|-----------|------------|-----------|------------|-----------|------------|-----------|------------|
| NA        | NA         | NA        | NA         | 3.49      | 1          | 0.26      | 1          | NA        | NA         | NA        | NA         |
| NA        | NA         | NA        | NA         | 0.23      | 1          | 0.09      | 1          | NA        | NA         | NA        | NA         |
| NA        | NA         | NA        | NA         | 0.23      | 1          | 0.20      | 1          | NA        | NA         | NA        | NA         |
| NA        | NA         | NA        | NA         | 0.33      | 1          | 1.19      | 1          | NA        | NA         | NA        | NA         |
| NA        | NA         | NA        | NA         | 0.22      | 1          | 0.24      | 1          | NA        | NA         | NA        | NA         |
| NA        | NA         | NA        | NA         | 0.19      | 1          | 0.44      | 1          | NA        | NA         | NA        | NA         |
| NA        | NA         | NA        | NA         | 0.19      | 1          | 0.94      | 1          | NA        | NA         | NA        | NA         |
| NA        | NA         | NA        | NA         | 0.24      | 1          | 0.02      | 1          | NA        | NA         | NA        | NA         |
| NA        | NA         | NA        | NA         | 0.19      | 1          | 0.01      | 1          | NA        | NA         | NA        | NA         |
| NA        | NA         | NA        | NA         | 3.11      | 1          | 0.16      | 1          | NA        | NA         | NA        | NA         |
| NA        | NA         | NA        | NA         | 0.25      | 1          | 0.07      | 1          | NA        | NA         | NA        | NA         |
| NA        | NA         | NA        | NA         | 0.22      | 1          | 0.13      | 1          | NA        | NA         | NA        | NA         |
| NA        | NA         | NA        | NA         | 0.19      | 1          | 0.09      | 1          | NA        | NA         | NA        | NA         |
| NA        | NA         | NA        | NA         | 0.18      | 1          | 0.12      | 1          | NA        | NA         | NA        | NA         |
| NA        | NA         | NA        | NA         | 3.74      | 0          | 0.07      | 1          | NA        | NA         | NA        | NA         |
| NA        | NA         | NA        | NA         | 0.57      | 0          | 0.11      | 1          | NA        | NA         | NA        | NA         |
| NA        | NA         | NA        | NA         | 2.59      | 0          | 0.25      | 1          | NA        | NA         | NA        | NA         |
| NA        | NA         | NA        | NA         | 0.93      | 1          | 0.11      | 1          | NA        | NA         | NA        | NA         |
| NA        | NA         | NA        | NA         | 0.29      | 1          | 1.02      | 1          | NA        | NA         | NA        | NA         |
| NA        | NA         | NA        | NA         | 0.34      | 1          | 0.22      | 1          | NA        | NA         | NA        | NA         |
| NA        | NA         | NA        | NA         | 7.06      | 1          | 0.05      | 1          | NA        | NA         | NA        | NA         |
| NA        | NA         | NA        | NA         | 0.88      | 1          | 0.16      | 1          | NA        | NA         | NA        | NA         |
| NA        | NA         | NA        | NA         | 0.28      | 1          | 0.44      | 1          | NA        | NA         | NA        | NA         |
| NA        | NA         | NA        | NA         | 0.21      | 1          | 0.18      | 1          | NA        | NA         | NA        | NA         |
| NA        | NA         | NA        | NA         | 0.22      | 1          | 1.45      | 1          | NA        | NA         | NA        | NA         |
| NA        | NA         | NA        | NA         | 0.25      | 1          | 0.26      | 1          | NA        | NA         | NA        | NA         |
| NA        | NA         | NA        | NA         | 4.52      | 1          | 0.22      | 1          | NA        | NA         | NA        | NA         |
| NA        | NA         | NA        | NA         | 1.23      | 1          | 0.20      | 1          | NA        | NA         | NA        | NA         |
| NA        | NA         | NA        | NA         | 0.26      | 1          | 0.20      | 1          | NA        | NA         | NA        | NA         |
| NA        | NA         | NA        | NA         | 0.22      | 1          | 0.30      | 1          | NA        | NA         | NA        | NA         |
| NA        | NA         | NA        | NA         | 0.20      | 1          | 2.77      | 1          | NA        | NA         | NA        | NA         |
| NA        | NA         | NA        | NA         | 9.69      | 1          | 0.22      | 1          | NA        | NA         | NA        | NA         |
| NA        | NA         | NA        | NA         | 0.24      | 1          | 0.27      | 1          | NA        | NA         | NA        | NA         |
| NA        | NA         | NA        | NA         | 0.22      | 1          | 0.20      | 1          | NA        | NA         | NA        | NA         |
| NA        | NA         | NA        | NA         | 0.20      | 1          | 0.60      | 1          | NA        | NA         | NA        | NA         |
| NA        | NA         | NA        | NA         | 0.40      | 1          | 0.22      | 1          | NA        | NA         | NA        | NA         |
| NA        | NA         | NA        | NA         | 0.24      | 1          | 0.23      | 1          | NA        | NA         | NA        | NA         |
| NA        | NA         | NA        | NA         | 0.21      | 1          | 0.05      | 1          | NA        | NA         | NA        | NA         |
| NA        | NA         | NA        | NA         | 0.19      | 1          | 0.10      | 1          | NA        | NA         | NA        | NA         |
| NA        | NA         | NA        | NA         | 0.23      | 1          | 1.05      | 1          | NA        | NA         | NA        | NA         |
| NA        | NA         | NA        | NA         | 0.19      | 1          | 0.26      | 1          | NA        | NA         | NA        | NA         |
| NA        | NA         | NA        | NA         | 0.20      | 1          | 0.30      | 1          | NA        | NA         | NA        | NA         |
| NA        | NA         | NA        | NA         | 5.58      | 1          | 0.26      | 1          | NA        | NA         | NA        | NA         |
| NA        | NA         | NA        | NA         | 0.25      | 1          | 0.07      | 1          | NA        | NA         | NA        | NA         |
| NA        | NA         | NA        | NA         | 0.21      | 1          | 0.13      | 1          | NA        | NA         | NA        | NA         |
| NA        | NA         | NA        | NA         | 0.19      | 1          | 0.22      | 1          | NA        | NA         | NA        | NA         |
| NA        | NA         | NA        | NA         | 0.18      | 1          | 0.28      | 1          | NA        | NA         | NA        | NA         |
| NA        | NA         | NA        | NA         | 8.37      | 1          | 0.26      | 1          | NA        | NA         | NA        | NA         |
| NA        | NA         | NA        | NA         | 0.45      | 1          | 0.02      | 1          | NA        | NA         | NA        | NA         |
| NA        | NA         | NA        | NA         | 0.24      | 1          | 0.01      | 1          | NA        | NA         | NA        | NA         |
| NA        | NA         | NA        | NA         | 0.22      | 1          | 0.15      | 1          | NA        | NA         | NA        | NA         |

| time<br>A | leuko<br>A | time<br>A | leuko<br>A | time<br>B | leuko<br>B | time<br>C | leuko<br>C | time<br>D | leuko<br>D | time<br>E | leuko<br>E |
|-----------|------------|-----------|------------|-----------|------------|-----------|------------|-----------|------------|-----------|------------|
| NA        | NA         | NA        | NA         | 0.22      | 1          | 0.08      | 1          | NA        | NA         | NA        | NA         |
| NA        | NA         | NA        | NA         | 0.20      | 1          | 0.11      | 1          | NA        | NA         | NA        | NA         |
| NA        | NA         | NA        | NA         | 0.19      | 1          | 0.09      | 1          | NA        | NA         | NA        | NA         |
| NA        | NA         | NA        | NA         | 0.28      | 1          | 0.12      | 1          | NA        | NA         | NA        | NA         |
| NA        | NA         | NA        | NA         | 0.21      | 1          | 0.07      | 1          | NA        | NA         | NA        | NA         |
| NA        | NA         | NA        | NA         | 0.20      | 1          | 0.28      | 1          | NA        | NA         | NA        | NA         |
| NA        | NA         | NA        | NA         | 0.19      | 1          | 0.23      | 1          | NA        | NA         | NA        | NA         |
| NA        | NA         | NA        | NA         | 5.99      | 0          | 0.17      | 1          | NA        | NA         | NA        | NA         |
| NA        | NA         | NA        | NA         | 1.53      | 0          | 0.28      | 1          | NA        | NA         | NA        | NA         |
| NA        | NA         | NA        | NA         | 1.00      | 1          | 0.11      | 1          | NA        | NA         | NA        | NA         |
| NA        | NA         | NA        | NA         | 0.26      | 1          | 1.15      | 1          | NA        | NA         | NA        | NA         |
| NA        | NA         | NA        | NA         | 0.23      | 1          | 0.21      | 1          | NA        | NA         | NA        | NA         |
| NA        | NA         | NA        | NA         | 0.35      | 1          | 0.22      | 1          | NA        | NA         | NA        | NA         |
| NA        | NA         | NA        | NA         | 0.20      | 1          | 0.25      | 1          | NA        | NA         | NA        | NA         |
| NA        | NA         | NA        | NA         | 0.21      | 1          | 0.09      | 1          | NA        | NA         | NA        | NA         |
| NA        | NA         | NA        | NA         | 0.20      | 1          | 0.30      | 1          | NA        | NA         | NA        | NA         |
| NA        | NA         | NA        | NA         | 0.26      | 1          | 0.03      | 1          | NA        | NA         | NA        | NA         |
| NA        | NA         | NA        | NA         | 0.18      | 1          | 0.14      | 1          | NA        | NA         | NA        | NA         |
| NA        | NA         | NA        | NA         | 0.32      | 1          | 0.08      | 1          | NA        | NA         | NA        | NA         |
| NA        | NA         | NA        | NA         | 0.19      | 1          | 0.12      | 1          | NA        | NA         | NA        | NA         |
| NA        | NA         | NA        | NA         | 3.73      | 1          | 0.25      | 1          | NA        | NA         | NA        | NA         |
| NA        | NA         | NA        | NA         | 0.26      | 1          | 0.01      | 1          | NA        | NA         | NA        | NA         |
| NA        | NA         | NA        | NA         | 0.23      | 1          | 0.02      | 1          | NA        | NA         | NA        | NA         |
| NA        | NA         | NA        | NA         | 0.21      | 1          | 0.18      | 1          | NA        | NA         | NA        | NA         |
| NA        | NA         | NA        | NA         | 0.23      | 1          | 0.31      | 1          | NA        | NA         | NA        | NA         |
| NA        | NA         | NA        | NA         | 0.29      | 1          | 0.35      | 1          | NA        | NA         | NA        | NA         |
| NA        | NA         | NA        | NA         | 0.22      | 1          | 0.25      | 1          | NA        | NA         | NA        | NA         |
| NA        | NA         | NA        | NA         | 0.21      | 1          | 3.17      | 1          | NA        | NA         | NA        | NA         |
| NA        | NA         | NA        | NA         | 1.10      | 1          | 0.21      | 1          | NA        | NA         | NA        | NA         |
| NA        | NA         | NA        | NA         | 4.67      | 1          | 0.21      | 1          | NA        | NA         | NA        | NA         |
| NA        | NA         | NA        | NA         | 0.25      | 1          | 0.27      | 1          | NA        | NA         | NA        | NA         |
| NA        | NA         | NA        | NA         | 0.20      | 1          | 0.06      | 1          | NA        | NA         | NA        | NA         |
| NA        | NA         | NA        | NA         | 0.27      | 1          | 0.12      | 1          | NA        | NA         | NA        | NA         |
| NA        | NA         | NA        | NA         | 0.21      | 1          | 0.24      | 1          | NA        | NA         | NA        | NA         |
| NA        | NA         | NA        | NA         | 0.21      | 1          | 0.07      | 1          | NA        | NA         | NA        | NA         |
| NA        | NA         | NA        | NA         | 0.20      | 1          | 0.12      | 1          | NA        | NA         | NA        | NA         |
| NA        | NA         | NA        | NA         | 0.26      | 1          | 0.07      | 1          | NA        | NA         | NA        | NA         |
| NA        | NA         | NA        | NA         | 0.20      | 1          | 0.13      | 1          | NA        | NA         | NA        | NA         |
| NA        | NA         | NA        | NA         | 0.18      | 1          | 0.23      | 1          | NA        | NA         | NA        | NA         |
| NA        | NA         | NA        | NA         | 0.20      | 1          | 0.39      | 1          | NA        | NA         | NA        | NA         |
| NA        | NA         | NA        | NA         | 0.27      | 1          | 0.24      | 1          | NA        | NA         | NA        | NA         |
| NA        | NA         | NA        | NA         | 0.19      | 1          | 0.69      | 1          | NA        | NA         | NA        | NA         |
| NA        | NA         | NA        | NA         | 0.26      | 1          | 0.07      | 1          | NA        | NA         | NA        | NA         |
| NA        | NA         | NA        | NA         | 0.18      | 1          | 1.30      | 1          | NA        | NA         | NA        | NA         |
| NA        | NA         | NA        | NA         | 13.27     | 1          | 0.21      | 1          | NA        | NA         | NA        | NA         |
| NA        | NA         | NA        | NA         | 0.28      | 1          | 0.11      | 1          | NA        | NA         | NA        | NA         |
| NA        | NA         | NA        | NA         | 0.23      | 1          | 0.10      | 1          | NA        | NA         | NA        | NA         |
| NA        | NA         | NA        | NA         | 0.31      | 1          | 0.21      | 1          | NA        | NA         | NA        | NA         |
| NA        | NA         | NA        | NA         | 0.21      | 1          | 0.21      | 1          | NA        | NA         | NA        | NA         |
| NA        | NA         | NA        | NA         | 0.34      | 1          | 0.18      | 1          | NA        | NA         | NA        | NA         |
| NA        | NA         | NA        | NA         | 0.21      | 1          | 1.16      | 1          | NA        | NA         | NA        | NA         |

| time<br>A | leuko<br>A | time<br>A | leuko<br>A | time<br>B | leuko<br>B | time<br>C | leuko<br>C | time<br>D | leuko<br>D | time<br>E | leuko<br>E |
|-----------|------------|-----------|------------|-----------|------------|-----------|------------|-----------|------------|-----------|------------|
| NA        | NA         | NA        | NA         | 0.30      | 1          | 0.20      | 1          | NA        | NA         | NA        | NA         |
| NA        | NA         | NA        | NA         | 0.21      | 1          | 0.24      | 1          | NA        | NA         | NA        | NA         |
| NA        | NA         | NA        | NA         | 1.17      | 1          | 0.21      | 1          | NA        | NA         | NA        | NA         |
| NA        | NA         | NA        | NA         | 0.25      | 1          | 0.42      | 1          | NA        | NA         | NA        | NA         |
| NA        | NA         | NA        | NA         | 0.21      | 1          | 1.01      | 1          | NA        | NA         | NA        | NA         |
| NA        | NA         | NA        | NA         | 0.19      | 1          | 0.18      | 1          | NA        | NA         | NA        | NA         |
| NA        | NA         | NA        | NA         | 0.09      | 1          | 0.22      | 1          | NA        | NA         | NA        | NA         |
| NA        | NA         | NA        | NA         | 0.10      | 1          | 0.08      | 1          | NA        | NA         | NA        | NA         |
| NA        | NA         | NA        | NA         | 7.70      | 0          | 0.11      | 1          | NA        | NA         | NA        | NA         |
| NA        | NA         | NA        | NA         | 5.22      | 1          | 0.18      | 1          | NA        | NA         | NA        | NA         |
| NA        | NA         | NA        | NA         | 0.24      | 1          | 0.25      | 1          | NA        | NA         | NA        | NA         |
| NA        | NA         | NA        | NA         | 0.22      | 1          | 0.99      | 1          | NA        | NA         | NA        | NA         |
| NA        | NA         | NA        | NA         | 0.21      | 1          | 0.21      | 1          | NA        | NA         | NA        | NA         |
| NA        | NA         | NA        | NA         | 0.20      | 1          | 0.23      | 1          | NA        | NA         | NA        | NA         |
| NA        | NA         | NA        | NA         | 0.31      | 1          | 0.09      | 1          | NA        | NA         | NA        | NA         |
| NA        | NA         | NA        | NA         | 0.22      | 1          | 0.16      | 1          | NA        | NA         | NA        | NA         |
| NA        | NA         | NA        | NA         | 0.19      | 1          | 0.25      | 1          | NA        | NA         | NA        | NA         |
| NA        | NA         | NA        | NA         | 0.19      | 1          | 0.19      | 1          | NA        | NA         | NA        | NA         |
| NA        | NA         | NA        | NA         | 1.76      | 1          | 1.20      | 1          | NA        | NA         | NA        | NA         |
| NA        | NA         | NA        | NA         | 0.28      | 1          | 0.19      | 1          | NA        | NA         | NA        | NA         |
| NA        | NA         | NA        | NA         | 0.22      | 1          | 0.09      | 1          | NA        | NA         | NA        | NA         |
| NA        | NA         | NA        | NA         | 0.24      | 1          | 0.12      | 1          | NA        | NA         | NA        | NA         |
| NA        | NA         | NA        | NA         | 0.80      | 1          | 0.21      | 1          | NA        | NA         | NA        | NA         |
| NA        | NA         | NA        | NA         | 0.27      | 1          | 0.21      | 1          | NA        | NA         | NA        | NA         |
| NA        | NA         | NA        | NA         | 0.24      | 1          | 0.25      | 1          | NA        | NA         | NA        | NA         |
| NA        | NA         | NA        | NA         | 0.24      | 1          | 0.07      | 1          | NA        | NA         | NA        | NA         |
| NA        | NA         | NA        | NA         | 1.99      | 0          | 0.16      | 1          | NA        | NA         | NA        | NA         |
| NA        | NA         | NA        | NA         | NA        | NA         | 0.26      | 1          | NA        | NA         | NA        | NA         |
| NA        | NA         | NA        | NA         | NA        | NA         | 1.31      | 1          | NA        | NA         | NA        | NA         |
| NA        | NA         | NA        | NA         | NA        | NA         | 0.22      | 1          | NA        | NA         | NA        | NA         |
| NA        | NA         | NA        | NA         | NA        | NA         | 0.50      | 1          | NA        | NA         | NA        | NA         |
| NA        | NA         | NA        | NA         | NA        | NA         | 0.10      | 1          | NA        | NA         | NA        | NA         |
| NA        | NA         | NA        | NA         | NA        | NA         | 0.14      | 1          | NA        | NA         | NA        | NA         |
| NA        | NA         | NA        | NA         | NA        | NA         | 1.15      | 1          | NA        | NA         | NA        | NA         |

### 1.3 A100

Table 3: Raw data of TBS A100.

| time<br>A | leuko<br>A | time<br>A | leuko<br>A | time<br>B | leuko<br>B | time<br>C | leuko<br>C | time<br>D | leuko<br>D | time<br>E | leuko<br>E |
|-----------|------------|-----------|------------|-----------|------------|-----------|------------|-----------|------------|-----------|------------|
| 0.00      | 1          | 0.00      | 1          | 0.00      | 1          | 0.00      | 1          | 0.00      | 1          | 0.00      | 1          |
| 0.31      | 1          | 0.21      | 1          | 0.39      | 1          | 0.22      | 1          | 0.19      | 1          | 0.22      | 1          |
| 0.22      | 1          | 0.18      | 1          | 0.38      | 1          | 0.29      | 1          | 0.21      | 1          | 0.23      | 1          |
| 0.21      | 1          | 0.35      | 1          | 0.82      | 1          | 0.35      | 1          | 0.41      | 1          | 0.24      | 1          |
| 0.18      | 1          | 0.41      | 1          | 0.32      | 1          | 0.41      | 1          | 0.21      | 1          | 0.30      | 1          |
| 0.21      | 1          | 0.21      | 1          | 0.29      | 1          | 0.75      | 1          | 0.32      | 1          | 4.74      | 1          |
| 0.50      | 1          | 0.20      | 1          | 0.27      | 1          | 0.23      | 1          | 0.20      | 1          | 0.26      | 1          |
| 0.24      | 1          | 0.16      | 1          | 0.61      | 1          | 0.26      | 1          | 0.25      | 1          | 0.22      | 1          |
| 0.21      | 1          | 0.17      | 1          | 0.30      | 1          | 0.49      | 1          | 0.21      | 1          | 0.28      | 1          |
| 0.21      | 1          | 0.16      | 1          | 0.29      | 1          | 0.47      | 1          | 0.26      | 1          | 0.28      | 1          |
| 0.55      | 1          | 0.19      | 1          | 0.25      | 1          | 0.42      | 1          | 0.20      | 1          | 0.23      | 1          |
| 0.21      | 1          | 1.59      | 1          | 0.77      | 1          | 0.22      | 1          | 0.29      | 1          | 6.59      | 1          |
| 0.19      | 1          | 0.20      | 1          | 0.30      | 1          | 0.28      | 1          | 0.29      | 1          | 0.25      | 1          |
| 0.21      | 1          | 0.15      | 1          | 0.33      | 1          | 0.29      | 1          | 0.42      | 1          | 0.31      | 1          |
| 0.19      | 1          | 0.19      | 1          | 0.85      | 1          | 14.62     | 1          | 0.52      | 1          | 0.30      | 1          |
| 0.17      | 1          | 0.19      | 1          | 0.30      | 1          | 0.24      | 1          | 0.22      | 1          | 0.23      | 1          |
| 3.32      | 1          | 0.17      | 1          | 0.26      | 1          | 0.23      | 1          | 0.18      | 1          | 14.51     | 1          |
| 0.25      | 1          | 0.14      | 1          | 0.26      | 1          | 0.23      | 1          | 6.30      | 1          | 0.29      | 1          |
| 0.19      | 1          | 0.18      | 1          | 0.36      | 1          | 0.31      | 1          | 0.27      | 1          | 0.25      | 1          |
| 0.17      | 1          | 0.14      | 1          | 0.28      | 1          | 0.27      | 1          | 0.27      | 1          | 0.27      | 1          |
| 0.18      | 1          | 1.28      | 1          | 0.25      | 1          | 0.19      | 1          | 0.39      | 1          | 0.24      | 1          |
| 0.06      | 1          | 0.23      | 1          | 0.32      | 1          | 0.24      | 1          | 0.38      | 1          | 4.12      | 1          |
| 0.08      | 1          | 0.12      | 1          | 0.28      | 1          | 0.19      | 1          | 2.31      | 1          | 0.29      | 1          |
| 0.18      | 1          | 0.18      | 1          | 0.24      | 1          | 0.25      | 1          | 0.28      | 1          | 0.27      | 1          |
| 0.18      | 1          | 0.15      | 1          | 0.24      | 1          | 0.19      | 1          | 0.22      | 1          | 0.29      | 1          |
| 0.17      | 1          | 0.16      | 1          | 0.48      | 1          | 0.28      | 1          | 0.35      | 1          | 0.25      | 1          |
| 0.21      | 1          | 0.14      | 1          | 0.32      | 1          | 0.20      | 1          | 0.19      | 1          | 0.24      | 1          |
| 2.65      | 1          | 0.13      | 1          | 0.28      | 1          | 2.83      | 1          | 0.21      | 1          | 0.31      | 1          |
| 0.25      | 1          | 0.14      | 1          | 0.31      | 1          | 0.22      | 1          | 0.51      | 1          | 5.16      | 1          |
| 0.20      | 1          | 1.84      | 1          | 0.29      | 1          | 0.19      | 1          | 0.30      | 1          | 0.29      | 1          |
| 0.17      | 1          | 0.21      | 1          | 8.40      | 1          | 0.23      | 1          | 0.23      | 1          | 0.27      | 1          |
| 0.18      | 1          | 0.17      | 1          | 0.30      | 1          | 0.28      | 1          | 9.17      | 1          | 0.27      | 1          |
| 0.17      | 1          | 0.18      | 1          | 0.26      | 1          | 0.25      | 1          | 0.21      | 1          | 0.24      | 1          |
| 0.19      | 1          | 0.16      | 1          | 0.27      | 1          | 0.36      | 1          | 0.22      | 1          | 0.29      | 1          |
| 0.17      | 1          | 0.18      | 1          | 2.37      | 1          | 0.18      | 1          | 0.48      | 1          | 0.23      | 1          |
| 0.19      | 1          | 0.18      | 1          | 0.27      | 1          | 0.24      | 1          | 0.19      | 1          | 0.29      | 1          |
| 0.19      | 1          | 0.19      | 1          | 0.26      | 1          | 0.35      | 1          | 0.18      | 1          | 0.26      | 1          |
| 0.18      | 1          | 0.18      | 1          | 0.27      | 1          | 0.20      | 1          | 0.34      | 1          | 0.26      | 1          |
| 0.18      | 1          | 0.19      | 1          | 0.87      | 1          | 0.20      | 1          | 0.19      | 1          | 0.30      | 1          |
| 0.18      | 1          | 0.20      | 1          | 0.30      | 1          | 0.23      | 1          | 0.44      | 1          | 0.26      | 1          |
| 0.17      | 1          | 3.01      | 1          | 0.29      | 1          | 0.19      | 1          | 0.40      | 1          | 0.30      | 1          |
| 0.20      | 1          | 0.21      | 1          | 1.20      | 1          | 0.21      | 1          | 0.19      | 1          | 0.35      | 1          |
| 0.20      | 1          | 0.16      | 1          | 0.28      | 1          | 0.24      | 1          | 0.21      | 1          | 3.18      | 1          |
| 0.19      | 1          | 0.18      | 1          | 0.27      | 1          | 0.19      | 1          | 0.29      | 1          | 0.25      | 1          |
| 3.40      | 1          | 0.16      | 1          | 0.27      | 1          | 0.26      | 1          | 0.52      | 1          | 0.25      | 1          |
| 0.30      | 1          | 0.17      | 1          | 0.58      | 1          | 0.22      | 1          | 0.21      | 1          | 0.28      | 1          |
| 0.18      | 1          | 0.17      | 1          | 0.28      | 1          | 0.23      | 1          | 0.22      | 1          | 0.27      | 1          |
| 0.23      | 1          | 0.17      | 1          | 0.27      | 1          | 5.16      | 1          | 0.37      | 1          | 2.82      | 1          |



| time<br>A | leuko<br>A | time<br>A | leuko<br>A | time<br>B | leuko<br>B | time<br>C | leuko<br>C | time<br>D | leuko<br>D | time<br>E | leuko<br>E |
|-----------|------------|-----------|------------|-----------|------------|-----------|------------|-----------|------------|-----------|------------|
| 0.29      | 1          | 0.17      | 1          | 0.27      | 1          | 0.21      | 1          | 0.43      | 1          | 0.24      | 1          |
| 0.23      | 1          | 0.16      | 1          | 0.51      | 1          | 0.28      | 1          | 0.17      | 1          | 0.28      | 1          |
| 0.19      | 1          | 0.16      | 1          | 0.27      | 1          | 0.21      | 1          | 0.31      | 1          | 0.25      | 1          |
| 0.26      | 1          | 0.18      | 1          | 0.38      | 1          | 0.20      | 1          | 0.20      | 1          | 0.27      | 1          |
| 0.17      | 1          | 0.17      | 1          | 0.26      | 1          | 0.21      | 1          | 10.26     | 1          | 0.25      | 1          |
| 0.22      | 1          | 0.15      | 1          | 3.22      | 1          | 0.21      | 1          | 0.20      | 1          | 0.26      | 1          |
| 0.19      | 1          | 1.95      | 1          | 0.28      | 1          | 0.22      | 1          | 0.37      | 1          | 0.07      | 1          |
| 0.22      | 1          | 0.18      | 1          | 0.26      | 1          | 0.19      | 1          | 0.21      | 1          | 0.19      | 1          |
| 2.97      | 1          | 0.19      | 1          | 0.53      | 1          | 0.22      | 1          | 0.36      | 1          | 0.05      | 1          |
| 0.28      | 1          | 0.18      | 1          | 0.24      | 1          | 0.24      | 1          | 0.44      | 1          | 0.21      | 1          |
| 0.18      | 1          | 0.18      | 1          | 0.26      | 1          | 0.19      | 1          | 0.23      | 1          | 0.25      | 1          |
| 0.21      | 1          | 0.18      | 1          | 0.21      | 1          | 0.19      | 1          | 0.24      | 1          | 2.37      | 1          |
| 0.18      | 1          | 0.18      | 1          | 0.38      | 1          | 0.19      | 1          | 0.26      | 1          | 0.29      | 1          |
| 0.17      | 1          | 0.18      | 1          | 0.23      | 1          | 0.20      | 1          | 0.20      | 1          | 0.23      | 1          |
| 0.19      | 1          | 0.17      | 1          | 0.34      | 1          | 0.28      | 1          | 0.21      | 1          | 0.31      | 1          |
| 0.20      | 1          | 0.17      | 1          | 0.27      | 1          | 0.19      | 1          | 0.21      | 1          | 0.27      | 1          |
| 0.18      | 1          | 0.18      | 1          | 0.25      | 1          | 0.20      | 1          | 0.20      | 1          | 0.22      | 1          |
| 0.20      | 1          | 0.18      | 1          | 0.23      | 1          | 0.21      | 1          | 0.22      | 1          | 0.28      | 1          |
| 0.18      | 1          | 0.16      | 1          | 0.35      | 1          | 0.27      | 1          | 0.19      | 1          | 0.25      | 1          |
| 0.20      | 1          | 0.18      | 1          | 0.24      | 1          | 4.63      | 1          | 0.23      | 1          | 0.27      | 1          |
| 0.18      | 1          | 0.17      | 1          | 0.24      | 1          | 0.23      | 1          | 0.18      | 1          | 3.04      | 1          |
| 0.21      | 1          | 0.18      | 1          | 0.33      | 1          | 0.31      | 1          | 0.41      | 1          | 0.29      | 1          |
| 0.19      | 1          | 0.16      | 1          | 0.26      | 1          | 0.29      | 1          | 0.18      | 1          | 0.25      | 1          |
| 0.19      | 1          | 2.07      | 1          | 0.23      | 1          | 0.18      | 1          | 2.26      | 1          | 0.26      | 1          |
| 0.19      | 1          | 0.22      | 1          | 0.21      | 1          | 0.18      | 1          | 0.20      | 1          | 0.27      | 1          |
| 4.10      | 1          | 0.19      | 1          | 8.18      | 1          | 0.21      | 1          | 0.21      | 1          | 0.29      | 1          |
| 0.26      | 1          | 0.18      | 1          | 0.28      | 1          | 0.26      | 1          | 0.20      | 1          | 0.28      | 1          |
| 0.18      | 1          | 0.18      | 1          | 0.27      | 1          | 0.30      | 1          | 0.21      | 1          | 0.25      | 1          |
| 0.19      | 1          | 0.17      | 1          | 0.25      | 1          | 0.21      | 1          | 0.19      | 1          | 0.31      | 1          |
| 0.19      | 1          | 0.17      | 1          | 0.45      | 1          | 0.27      | 1          | 0.52      | 1          | 0.26      | 1          |
| 0.17      | 1          | 0.17      | 1          | 0.26      | 1          | 0.20      | 1          | 0.21      | 1          | 0.32      | 1          |
| 0.19      | 1          | 0.20      | 1          | 0.25      | 1          | 0.20      | 1          | 0.20      | 1          | 3.28      | 1          |
| 0.17      | 1          | 0.18      | 1          | 0.38      | 1          | 0.21      | 1          | 0.17      | 1          | 0.27      | 1          |
| 0.17      | 1          | 0.18      | 1          | 0.27      | 1          | 0.19      | 1          | 8.22      | 1          | 0.24      | 1          |
| 0.28      | 1          | 0.16      | 1          | 0.24      | 1          | 0.21      | 1          | 0.20      | 1          | 0.25      | 1          |
| 0.18      | 1          | 0.18      | 1          | 0.40      | 1          | 0.20      | 1          | 0.83      | 1          | 0.24      | 1          |
| 0.21      | 1          | 0.18      | 1          | 0.28      | 1          | 0.22      | 1          | 0.20      | 1          | 0.26      | 1          |
| 0.15      | 1          | 0.17      | 1          | 0.26      | 1          | 0.22      | 1          | 0.17      | 1          | 0.24      | 1          |
| 0.19      | 1          | 0.17      | 1          | 0.43      | 1          | 2.92      | 1          | 0.46      | 1          | 0.28      | 1          |
| 2.02      | 1          | 2.16      | 1          | 0.27      | 1          | 0.21      | 1          | 0.62      | 1          | 0.24      | 1          |
| 0.24      | 1          | 0.24      | 1          | 0.25      | 1          | 0.21      | 1          | 0.20      | 1          | 0.26      | 1          |
| 0.20      | 1          | 0.21      | 1          | 0.24      | 1          | 0.24      | 1          | 2.19      | 1          | 0.31      | 1          |
| 0.18      | 1          | 0.18      | 1          | 0.23      | 1          | 0.22      | 1          | 0.22      | 1          | 2.71      | 1          |
| 0.19      | 1          | 0.19      | 1          | 2.97      | 1          | 0.20      | 1          | 0.40      | 1          | 0.28      | 1          |
| 0.19      | 1          | 0.19      | 1          | 0.28      | 1          | 0.20      | 1          | 0.29      | 1          | 0.25      | 1          |
| 0.19      | 1          | 0.20      | 1          | 0.24      | 1          | 0.20      | 1          | 0.19      | 1          | 0.26      | 1          |
| 0.20      | 1          | 0.18      | 1          | 0.23      | 1          | 0.23      | 1          | 0.31      | 1          | 0.32      | 1          |
| 0.19      | 1          | 0.18      | 1          | 0.35      | 1          | 0.26      | 1          | 9.60      | 1          | 0.20      | 1          |
| 0.14      | 1          | 0.18      | 1          | 0.25      | 1          | 0.21      | 1          | 0.20      | 1          | 0.27      | 1          |
| 0.26      | 1          | 0.18      | 1          | 0.24      | 1          | 0.20      | 1          | 0.31      | 1          | 0.23      | 1          |
| 0.18      | 1          | 0.18      | 1          | 0.22      | 1          | 0.19      | 1          | 0.41      | 1          | 0.25      | 1          |

| time<br>A | leuko<br>A | time<br>A | leuko<br>A | time<br>B | leuko<br>B | time<br>C | leuko<br>C | time<br>D | leuko<br>D | time<br>E | leuko<br>E |
|-----------|------------|-----------|------------|-----------|------------|-----------|------------|-----------|------------|-----------|------------|
| 0.19      | 1          | 0.20      | 1          | 2.18      | 1          | 0.19      | 1          | 0.19      | 1          | 0.24      | 1          |
| 0.15      | 1          | 4.36      | 1          | 0.26      | 1          | 0.20      | 1          | 0.24      | 1          | 0.25      | 1          |
| 0.20      | 1          | 0.21      | 1          | 0.21      | 1          | 0.21      | 1          | 0.17      | 1          | 2.57      | 1          |
| 0.20      | 1          | 0.17      | 1          | 0.24      | 1          | 2.23      | 1          | 0.23      | 1          | 0.26      | 1          |
| 0.19      | 1          | 0.18      | 1          | 0.40      | 1          | 0.20      | 1          | 0.19      | 1          | 0.45      | 1          |
| 0.19      | 1          | 0.18      | 1          | 0.26      | 1          | 0.21      | 1          | 0.20      | 1          | 0.30      | 1          |
| 0.21      | 1          | 0.17      | 1          | 0.24      | 1          | 0.23      | 1          | 0.17      | 1          | 0.26      | 1          |
| 0.20      | 1          | 0.20      | 1          | 0.22      | 1          | 0.20      | 1          | 0.26      | 1          | 0.25      | 1          |
| 0.26      | 1          | 0.18      | 1          | 0.32      | 1          | 0.24      | 1          | 0.25      | 1          | 0.25      | 1          |
| 0.45      | 1          | 0.17      | 1          | 0.23      | 1          | 0.23      | 1          | 0.17      | 1          | 0.28      | 1          |
| 0.35      | 1          | 0.35      | 1          | 0.22      | 1          | 0.19      | 1          | 0.19      | 1          | 6.77      | 1          |
| 0.23      | 1          | 0.12      | 1          | 0.21      | 1          | 0.08      | 1          | 0.21      | 1          | 0.31      | 1          |
| 0.19      | 1          | 0.17      | 1          | 4.86      | 1          | 0.12      | 1          | 0.18      | 1          | 0.26      | 1          |
| 0.22      | 1          | 0.23      | 1          | 0.27      | 1          | 0.23      | 1          | 0.19      | 1          | 0.28      | 1          |
| 0.20      | 1          | 0.19      | 1          | 0.26      | 1          | 0.26      | 1          | 0.21      | 1          | 0.08      | 1          |
| 4.90      | 1          | 0.17      | 1          | 0.24      | 1          | 0.26      | 1          | 0.21      | 1          | 0.16      | 1          |
| 0.27      | 1          | 0.19      | 1          | 0.38      | 1          | 0.24      | 1          | 0.24      | 1          | 0.26      | 1          |
| 0.18      | 1          | 0.18      | 1          | 0.23      | 1          | 0.22      | 1          | 0.29      | 1          | 0.26      | 1          |
| 0.17      | 1          | 0.20      | 1          | 0.24      | 1          | 0.21      | 1          | 0.22      | 1          | 0.28      | 1          |
| 0.17      | 1          | 0.20      | 1          | 0.28      | 1          | 0.21      | 1          | 0.26      | 1          | 0.27      | 1          |
| 0.19      | 1          | 3.89      | 1          | 0.24      | 1          | 2.40      | 1          | 0.19      | 1          | 5.95      | 1          |
| 0.18      | 1          | 0.21      | 1          | 0.17      | 1          | 0.21      | 1          | 0.18      | 1          | 0.26      | 1          |
| 0.19      | 1          | 0.19      | 1          | 0.22      | 1          | 0.21      | 1          | 9.46      | 1          | 0.34      | 1          |
| 0.19      | 1          | 0.17      | 1          | 0.30      | 1          | 0.20      | 1          | 0.20      | 1          | 0.24      | 1          |
| 0.19      | 1          | 0.20      | 1          | 0.23      | 1          | 0.21      | 1          | 0.20      | 1          | 0.21      | 1          |
| 0.17      | 1          | 0.19      | 1          | 0.22      | 1          | 0.20      | 1          | 0.24      | 1          | 0.26      | 1          |
| 0.20      | 1          | 0.16      | 1          | 0.23      | 1          | 0.28      | 1          | 0.49      | 1          | 0.25      | 1          |
| 0.19      | 1          | 0.18      | 1          | 0.23      | 1          | 0.22      | 1          | 0.20      | 1          | 0.24      | 1          |
| 0.20      | 1          | 0.18      | 1          | 4.62      | 1          | 0.22      | 1          | 0.22      | 1          | 0.25      | 1          |
| 0.19      | 1          | 0.22      | 1          | 0.27      | 1          | 0.21      | 1          | 0.45      | 1          | 0.25      | 1          |
| 0.18      | 1          | 0.45      | 1          | 0.26      | 1          | 0.22      | 1          | 0.21      | 1          | 0.24      | 1          |
| 0.20      | 1          | 0.25      | 1          | 0.42      | 1          | 0.24      | 1          | 0.21      | 1          | 2.40      | 1          |
| 0.19      | 1          | 0.18      | 1          | 0.22      | 1          | 0.22      | 1          | 0.56      | 1          | 0.25      | 1          |
| 0.19      | 1          | 0.20      | 1          | 0.25      | 1          | 0.21      | 1          | 0.32      | 1          | 0.26      | 1          |
| 0.19      | 1          | 0.20      | 1          | 0.25      | 1          | 0.32      | 1          | 0.63      | 1          | 0.23      | 1          |
| 0.21      | 1          | 0.20      | 1          | 0.52      | 1          | 0.23      | 1          | 0.57      | 1          | 0.24      | 1          |
| 0.15      | 1          | 0.19      | 1          | 0.37      | 1          | 0.24      | 1          | 0.62      | 1          | 3.66      | 1          |
| 3.17      | 1          | 0.19      | 1          | 0.27      | 1          | 0.22      | 1          | 0.23      | 1          | 0.30      | 1          |
| 0.24      | 1          | 0.21      | 1          | 0.26      | 1          | 3.70      | 1          | 0.34      | 1          | 0.25      | 1          |
| 0.19      | 1          | 0.21      | 1          | 0.25      | 1          | 0.20      | 1          | 0.33      | 1          | 0.27      | 1          |
| 0.19      | 1          | 0.20      | 1          | 0.32      | 1          | 0.20      | 1          | 0.20      | 1          | 0.26      | 1          |
| 0.19      | 1          | 13.82     | 1          | 0.56      | 1          | 0.29      | 1          | 0.33      | 1          | 0.27      | 1          |
| 0.19      | 1          | 0.24      | 1          | 0.29      | 1          | 0.22      | 1          | 0.57      | 1          | 0.26      | 1          |
| 0.16      | 1          | 0.18      | 1          | 0.23      | 1          | 0.21      | 1          | 0.36      | 1          | 0.26      | 1          |
| 0.20      | 1          | 0.19      | 1          | 0.25      | 1          | 0.18      | 1          | 0.24      | 1          | 0.07      | 1          |
| 0.18      | 1          | 0.16      | 1          | 0.31      | 1          | 0.21      | 1          | 5.66      | 1          | 0.13      | 1          |
| 0.20      | 1          | 0.19      | 1          | 0.24      | 1          | 0.21      | 1          | 0.24      | 1          | 4.57      | 1          |
| 0.20      | 1          | 0.17      | 1          | 0.22      | 1          | 0.08      | 1          | 0.23      | 1          | 0.26      | 1          |
| 0.19      | 1          | 0.16      | 1          | 0.28      | 1          | 0.39      | 1          | 0.45      | 1          | 0.28      | 1          |
| 0.19      | 1          | 0.18      | 1          | 0.24      | 1          | 0.23      | 1          | 0.22      | 1          | 0.27      | 1          |
| 0.20      | 1          | 0.17      | 1          | 0.23      | 1          | 0.22      | 1          | 0.55      | 1          | 0.23      | 1          |

| time<br>A | leuko<br>A | time<br>A | leuko<br>A | time<br>B | leuko<br>B | time<br>C | leuko<br>C | time<br>D | leuko<br>D | time<br>E | leuko<br>E |
|-----------|------------|-----------|------------|-----------|------------|-----------|------------|-----------|------------|-----------|------------|
| 0.20      | 1          | 0.19      | 1          | 4.26      | 1          | 0.21      | 1          | 0.20      | 1          | 0.28      | 1          |
| 0.19      | 1          | 0.18      | 1          | 0.26      | 1          | 0.23      | 1          | 0.29      | 1          | 0.24      | 1          |
| 0.19      | 1          | 0.34      | 1          | 0.23      | 1          | 0.24      | 1          | 0.20      | 1          | 0.25      | 1          |
| 0.19      | 1          | 0.20      | 1          | 0.35      | 1          | 0.22      | 1          | 0.20      | 1          | 0.23      | 1          |
| 0.19      | 1          | 2.97      | 1          | 0.23      | 1          | 0.21      | 1          | 0.22      | 1          | 4.89      | 1          |
| 1.82      | 1          | 0.39      | 1          | 0.23      | 1          | 0.23      | 1          | 0.18      | 1          | 0.27      | 1          |
| 0.23      | 1          | 0.16      | 1          | 0.23      | 1          | 0.24      | 1          | 0.26      | 1          | 0.24      | 1          |
| 0.20      | 1          | 0.12      | 1          | 0.31      | 1          | 0.22      | 1          | 0.22      | 1          | 0.26      | 1          |
| 0.18      | 1          | 0.25      | 1          | 0.23      | 1          | 0.20      | 1          | 0.20      | 1          | 0.25      | 1          |
| 0.18      | 1          | 0.22      | 1          | 0.23      | 1          | 4.29      | 1          | 0.26      | 1          | 0.26      | 1          |
| 0.20      | 1          | 0.16      | 1          | 0.20      | 1          | 0.21      | 1          | 0.19      | 1          | 0.24      | 1          |
| 0.17      | 1          | 0.17      | 1          | 1.27      | 1          | 0.23      | 1          | 0.36      | 1          | 5.89      | 1          |
| 0.18      | 1          | 0.17      | 1          | 0.27      | 1          | 0.19      | 1          | 0.48      | 1          | 0.27      | 1          |
| 0.18      | 1          | 0.19      | 1          | 0.24      | 1          | 0.20      | 1          | 0.23      | 1          | 0.32      | 1          |
| 0.18      | 1          | 0.20      | 1          | 0.21      | 1          | 0.19      | 1          | 0.29      | 1          | 0.25      | 1          |
| 0.19      | 1          | 0.18      | 1          | 0.24      | 1          | 0.25      | 1          | 0.30      | 1          | 0.27      | 1          |
| 0.19      | 1          | 0.17      | 1          | 0.27      | 1          | 0.21      | 1          | 13.90     | 1          | 0.26      | 1          |
| 0.19      | 1          | 1.79      | 1          | 0.22      | 1          | 0.26      | 1          | 0.20      | 1          | 0.24      | 1          |
| 0.19      | 1          | 2.70      | 1          | 0.23      | 1          | 0.20      | 1          | 0.18      | 1          | 0.25      | 1          |
| 0.20      | 1          | 0.24      | 1          | 0.24      | 1          | 0.19      | 1          | 0.29      | 1          | 0.24      | 1          |
| 0.16      | 1          | 0.17      | 1          | 0.22      | 1          | 0.20      | 1          | 0.20      | 1          | 0.23      | 1          |
| 0.20      | 1          | 0.18      | 1          | 0.32      | 1          | 0.22      | 1          | 0.18      | 1          | 0.24      | 1          |
| 0.20      | 1          | 0.19      | 1          | 0.27      | 1          | 0.32      | 1          | 0.19      | 1          | 3.20      | 1          |
| 0.18      | 1          | 0.18      | 1          | 0.25      | 1          | 0.21      | 1          | 0.21      | 1          | 0.23      | 1          |
| 2.78      | 1          | 0.19      | 1          | 0.26      | 1          | 0.21      | 1          | 0.21      | 1          | 0.27      | 1          |
| 0.25      | 1          | 0.17      | 1          | 3.10      | 1          | 0.23      | 1          | 0.17      | 1          | 0.21      | 1          |
| 0.17      | 1          | 0.21      | 1          | 0.26      | 1          | 5.89      | 1          | 0.16      | 1          | 0.25      | 1          |
| 0.20      | 1          | 0.20      | 1          | 0.63      | 1          | 0.19      | 1          | 0.34      | 1          | 0.27      | 1          |
| 0.17      | 1          | 0.18      | 1          | 0.23      | 1          | 0.23      | 1          | 0.23      | 1          | 0.24      | 1          |
| 0.17      | 1          | 0.17      | 1          | 0.45      | 1          | 0.19      | 1          | 0.18      | 1          | 0.26      | 1          |
| 0.17      | 1          | 0.18      | 1          | 0.25      | 1          | 0.25      | 1          | 0.20      | 1          | 0.23      | 1          |
| 0.18      | 1          | 0.19      | 1          | 0.35      | 1          | 0.22      | 1          | 0.19      | 1          | 0.22      | 1          |
| 0.18      | 1          | 3.86      | 1          | 0.25      | 1          | 0.21      | 1          | 0.18      | 1          | 0.22      | 1          |
| 0.18      | 1          | 0.21      | 1          | 0.25      | 1          | 0.20      | 1          | 0.18      | 1          | 0.30      | 1          |
| 0.19      | 1          | 0.18      | 1          | 1.00      | 1          | 0.26      | 1          | 0.19      | 1          | 5.23      | 1          |
| 0.18      | 1          | 0.19      | 1          | 0.26      | 1          | 0.20      | 1          | 0.17      | 1          | 0.32      | 1          |
| 0.19      | 1          | 0.18      | 1          | 0.22      | 1          | 0.25      | 1          | 0.15      | 1          | 0.26      | 1          |
| 0.18      | 1          | 0.18      | 1          | 0.32      | 1          | 0.21      | 1          | 0.19      | 1          | 0.28      | 1          |
| 0.20      | 1          | 0.18      | 1          | 0.22      | 1          | 0.08      | 1          | 0.18      | 1          | 0.23      | 1          |
| 0.18      | 1          | 0.19      | 1          | 0.31      | 1          | 3.54      | 1          | 0.20      | 1          | 0.26      | 1          |
| 0.20      | 1          | 0.20      | 1          | 0.23      | 1          | 0.19      | 1          | 5.19      | 1          | 0.27      | 1          |
| 0.20      | 1          | 0.15      | 1          | 0.23      | 1          | 0.20      | 1          | 0.19      | 1          | 0.25      | 1          |
| 3.20      | 1          | 0.19      | 1          | 0.24      | 1          | 0.21      | 1          | 0.21      | 1          | 0.28      | 1          |
| 0.18      | 1          | 0.19      | 1          | 2.26      | 1          | 0.20      | 1          | 2.02      | 1          | 0.25      | 1          |
| 0.20      | 1          | 0.19      | 1          | 0.29      | 1          | 0.22      | 1          | 0.20      | 1          | 0.26      | 1          |
| 0.19      | 1          | 0.16      | 1          | 0.24      | 1          | 0.22      | 1          | 0.27      | 1          | 8.33      | 1          |
| 0.35      | 1          | 0.20      | 1          | 0.23      | 1          | 0.21      | 1          | 0.22      | 1          | 0.25      | 1          |
| 0.22      | 1          | 0.17      | 1          | 0.29      | 1          | 0.26      | 1          | 0.25      | 1          | 0.29      | 1          |
| 0.21      | 1          | 3.74      | 1          | 0.24      | 1          | 0.09      | 1          | 0.20      | 1          | 0.28      | 1          |
| 2.70      | 1          | 0.26      | 1          | 0.21      | 1          | 0.57      | 1          | 0.24      | 1          | 0.30      | 1          |
| 0.24      | 1          | 0.21      | 1          | 0.22      | 1          | 0.22      | 1          | 0.14      | 1          | 0.24      | 1          |

| time<br>A | leuko<br>A | time<br>A | leuko<br>A | time<br>B | leuko<br>B | time<br>C | leuko<br>C | time<br>D | leuko<br>D | time<br>E | leuko<br>E |
|-----------|------------|-----------|------------|-----------|------------|-----------|------------|-----------|------------|-----------|------------|
| 0.19      | 1          | 0.18      | 1          | 0.26      | 1          | 0.21      | 1          | 0.20      | 1          | 0.29      | 1          |
| 0.19      | 1          | 0.20      | 1          | 0.23      | 1          | 0.22      | 1          | 0.38      | 1          | 0.26      | 1          |
| 0.17      | 1          | 0.16      | 1          | 0.22      | 1          | 0.21      | 1          | 0.17      | 1          | 0.26      | 1          |
| 0.18      | 1          | 0.16      | 1          | 0.28      | 1          | 0.34      | 1          | 0.29      | 1          | 0.24      | 1          |
| 0.18      | 1          | 0.18      | 1          | 0.24      | 1          | 3.12      | 1          | 0.26      | 1          | 0.28      | 1          |
| 0.18      | 1          | 0.18      | 1          | 0.20      | 1          | 0.21      | 1          | 0.26      | 1          | 0.26      | 1          |
| 0.18      | 1          | 0.16      | 1          | 0.28      | 1          | 0.21      | 1          | 9.50      | 1          | 0.25      | 1          |
| 0.16      | 1          | 0.18      | 1          | 0.21      | 1          | 0.20      | 1          | 0.19      | 1          | 0.25      | 1          |
| 0.17      | 1          | 0.17      | 1          | 5.13      | 1          | 0.21      | 1          | 0.28      | 1          | 0.25      | 1          |
| 0.22      | 1          | 0.18      | 1          | 0.29      | 1          | 0.39      | 1          | 0.23      | 1          | 0.27      | 1          |
| 0.19      | 1          | 0.20      | 1          | 0.24      | 1          | 0.35      | 1          | 0.22      | 1          | 4.61      | 1          |
| 0.18      | 1          | 2.96      | 1          | 0.31      | 1          | 2.72      | 1          | 0.24      | 1          | 0.24      | 1          |
| 0.22      | 1          | 0.21      | 1          | 0.25      | 1          | 0.22      | 1          | 0.23      | 1          | 0.30      | 1          |
| 0.22      | 1          | 0.16      | 1          | 0.22      | 1          | 0.24      | 1          | 0.23      | 1          | 0.29      | 1          |
| 0.18      | 1          | 0.20      | 1          | 0.23      | 1          | 0.46      | 1          | 0.23      | 1          | 0.28      | 1          |
| 2.09      | 1          | 0.17      | 1          | 0.29      | 1          | 0.23      | 1          | 0.21      | 1          | 0.24      | 1          |
| 0.27      | 1          | 0.19      | 1          | 0.24      | 1          | 0.20      | 1          | 0.23      | 1          | 0.22      | 1          |
| 0.17      | 1          | 0.18      | 1          | 0.24      | 1          | 0.22      | 1          | 0.22      | 1          | 0.28      | 1          |
| 0.19      | 1          | 0.19      | 1          | 0.22      | 1          | 0.25      | 1          | 0.22      | 1          | 0.24      | 1          |
| 0.19      | 1          | 0.19      | 1          | 0.34      | 1          | 0.24      | 1          | 0.22      | 1          | 0.27      | 1          |
| 0.19      | 1          | 0.19      | 1          | 0.23      | 1          | 0.25      | 1          | 0.20      | 1          | 0.23      | 1          |
| 0.20      | 1          | 0.19      | 1          | 0.22      | 1          | 0.19      | 1          | 0.23      | 1          | 2.98      | 1          |
| 0.17      | 1          | 0.17      | 1          | 0.22      | 1          | 0.18      | 1          | 0.20      | 1          | 0.24      | 1          |
| 0.18      | 1          | 0.19      | 1          | 2.97      | 1          | 0.22      | 1          | 0.24      | 1          | 0.50      | 1          |
| 0.18      | 1          | 0.45      | 1          | 0.28      | 1          | 0.23      | 1          | 0.24      | 1          | 0.30      | 1          |
| 0.21      | 1          | 2.96      | 1          | 0.25      | 1          | 0.19      | 1          | 0.24      | 1          | 0.25      | 1          |
| 0.17      | 1          | 0.20      | 1          | 0.26      | 1          | 0.19      | 1          | 0.26      | 1          | 0.26      | 1          |
| 2.30      | 1          | 0.21      | 1          | 0.42      | 1          | 0.21      | 1          | 0.25      | 1          | 0.26      | 1          |
| 0.28      | 1          | 0.23      | 1          | 0.26      | 1          | 0.22      | 1          | 0.24      | 1          | 0.25      | 1          |
| 0.24      | 1          | 0.19      | 1          | 0.24      | 1          | 0.07      | 1          | 0.24      | 1          | 0.25      | 1          |
| 0.20      | 1          | 0.17      | 1          | 0.26      | 1          | 1.92      | 1          | 0.21      | 1          | 0.30      | 1          |
| 0.21      | 1          | 0.19      | 1          | 0.24      | 1          | 0.22      | 1          | 0.24      | 1          | 0.28      | 1          |
| 0.18      | 1          | 0.20      | 1          | 0.30      | 1          | 0.20      | 1          | 0.25      | 1          | 6.14      | 1          |
| 0.20      | 1          | 0.18      | 1          | 0.22      | 1          | 0.20      | 1          | 0.23      | 1          | 0.23      | 1          |
| 0.19      | 1          | 0.16      | 1          | 0.23      | 1          | 0.20      | 1          | 0.23      | 1          | 0.28      | 1          |
| 0.20      | 1          | 0.16      | 1          | 0.30      | 1          | 0.36      | 1          | 0.23      | 1          | 0.26      | 1          |
| 0.18      | 1          | 0.18      | 1          | 0.20      | 1          | 0.21      | 1          | 0.23      | 1          | 0.25      | 1          |
| 0.18      | 1          | 0.19      | 1          | 3.24      | 1          | 0.28      | 1          | 0.24      | 1          | 0.26      | 1          |
| 0.20      | 1          | 0.19      | 1          | 0.31      | 1          | 0.25      | 1          | 0.23      | 1          | 0.25      | 1          |
| 0.20      | 1          | 0.17      | 1          | 0.27      | 1          | 0.35      | 1          | 0.23      | 1          | 0.27      | 1          |
| 0.20      | 1          | 0.18      | 1          | 0.32      | 1          | 0.20      | 1          | 0.20      | 1          | 0.28      | 1          |
| 0.19      | 1          | 0.24      | 1          | 0.28      | 1          | 0.20      | 1          | 0.24      | 1          | 0.28      | 1          |
| 0.18      | 1          | 0.24      | 1          | 0.24      | 1          | 0.21      | 1          | 0.23      | 1          | 2.54      | 1          |
| 2.52      | 1          | 1.99      | 1          | 0.34      | 1          | 0.21      | 1          | 0.21      | 1          | 0.30      | 1          |
| 0.22      | 1          | 0.23      | 1          | 0.26      | 1          | 0.41      | 1          | 0.23      | 1          | 0.27      | 1          |
| 0.18      | 1          | 0.16      | 1          | 0.22      | 1          | 0.28      | 1          | 0.19      | 1          | 0.26      | 1          |
| 0.19      | 1          | 0.18      | 1          | 0.39      | 1          | 0.30      | 1          | 0.19      | 1          | 0.26      | 1          |
| 0.18      | 1          | 0.17      | 1          | 0.28      | 1          | 0.65      | 1          | 0.21      | 1          | 0.26      | 1          |
| 0.18      | 1          | 0.19      | 1          | 0.31      | 1          | 5.50      | 1          | 7.92      | 1          | 0.27      | 1          |
| 0.17      | 1          | 0.18      | 1          | 0.24      | 1          | 0.21      | 1          | 0.18      | 1          | 0.26      | 1          |
| 0.17      | 1          | 0.17      | 1          | 0.21      | 1          | 0.22      | 1          | 0.18      | 1          | 0.30      | 1          |

| time<br>A | leuko<br>A | time<br>A | leuko<br>A | time<br>B | leuko<br>B | time<br>C | leuko<br>C | time<br>D | leuko<br>D | time<br>E | leuko<br>E |
|-----------|------------|-----------|------------|-----------|------------|-----------|------------|-----------|------------|-----------|------------|
| 4.08      | 1          | 0.14      | 1          | 3.59      | 1          | 0.21      | 1          | 0.19      | 1          | 3.39      | 1          |
| 0.24      | 1          | 0.17      | 1          | 0.22      | 1          | 0.25      | 1          | 0.30      | 1          | 0.23      | 1          |
| 0.19      | 1          | 0.17      | 1          | 0.22      | 1          | 0.19      | 1          | 0.20      | 1          | 0.30      | 1          |
| 0.20      | 1          | 0.16      | 1          | 0.27      | 1          | 0.21      | 1          | 0.18      | 1          | 0.25      | 1          |
| 0.18      | 1          | 1.58      | 1          | 0.22      | 1          | 0.20      | 1          | 0.21      | 1          | 0.24      | 1          |
| 0.18      | 1          | 0.20      | 1          | 3.86      | 1          | 0.48      | 1          | 0.18      | 1          | 0.32      | 1          |
| 0.18      | 1          | 0.17      | 1          | 0.28      | 1          | 0.20      | 1          | 0.25      | 1          | 0.28      | 1          |
| 0.19      | 1          | 0.17      | 1          | 0.25      | 1          | 0.23      | 1          | 0.21      | 1          | 0.26      | 1          |
| 0.19      | 1          | 0.34      | 1          | 0.24      | 1          | 0.30      | 1          | 0.18      | 1          | 0.27      | 1          |
| 0.19      | 1          | 0.19      | 1          | 0.24      | 1          | 0.21      | 1          | 0.23      | 1          | 0.28      | 1          |
| 0.18      | 1          | 0.17      | 1          | 0.45      | 1          | 0.21      | 1          | 0.89      | 1          | 0.29      | 1          |
| 0.17      | 1          | 1.83      | 1          | 0.25      | 1          | 0.24      | 1          | 0.20      | 1          | 0.29      | 1          |
| 0.17      | 1          | 0.19      | 1          | 0.22      | 1          | 0.20      | 1          | 0.16      | 1          | 0.30      | 1          |
| 0.19      | 1          | 0.18      | 1          | 0.33      | 1          | 0.19      | 1          | 0.16      | 1          | 0.23      | 1          |
| 0.18      | 1          | 0.18      | 1          | 0.23      | 1          | 0.28      | 1          | 2.11      | 1          | 0.21      | 1          |
| 1.97      | 1          | 0.13      | 1          | 0.24      | 1          | 0.80      | 1          | 0.22      | 1          | 0.24      | 1          |
| 0.23      | 1          | 0.23      | 1          | 0.23      | 1          | 0.21      | 1          | 0.19      | 1          | 3.01      | 1          |
| 0.18      | 1          | 0.21      | 1          | 0.21      | 1          | 4.11      | 1          | 0.22      | 1          | 0.28      | 1          |
| 0.17      | 1          | 0.17      | 1          | 0.38      | 1          | 0.21      | 1          | 0.23      | 1          | 0.28      | 1          |
| 0.21      | 1          | 0.19      | 1          | 0.52      | 1          | 0.22      | 1          | 0.19      | 1          | 0.25      | 1          |
| 0.15      | 1          | 0.18      | 1          | 0.29      | 1          | 0.08      | 1          | 0.20      | 1          | 0.29      | 1          |
| 0.19      | 1          | 0.19      | 1          | 0.25      | 1          | 0.10      | 1          | 0.19      | 1          | 0.26      | 1          |
| 0.18      | 1          | 0.19      | 1          | 0.28      | 1          | 0.22      | 1          | 10.56     | 1          | 0.26      | 1          |
| 0.18      | 1          | 0.17      | 1          | 0.54      | 1          | 0.18      | 1          | 0.27      | 1          | 0.27      | 1          |
| 0.19      | 1          | 3.53      | 1          | 0.28      | 1          | 0.21      | 1          | 0.23      | 1          | 0.29      | 1          |
| 0.17      | 1          | 0.20      | 1          | 0.25      | 1          | 0.27      | 1          | 0.17      | 1          | 0.29      | 1          |
| 0.18      | 1          | 0.18      | 1          | 0.46      | 1          | 0.20      | 1          | 0.30      | 1          | 0.35      | 1          |
| 0.17      | 1          | 0.16      | 1          | 0.26      | 1          | 0.21      | 1          | 0.18      | 1          | 0.35      | 1          |
| 0.18      | 1          | 0.17      | 1          | 5.52      | 1          | 0.24      | 1          | 0.26      | 1          | 6.52      | 1          |
| 0.18      | 1          | 0.17      | 1          | 0.26      | 1          | 0.39      | 1          | 0.18      | 1          | 0.22      | 1          |
| 1.83      | 1          | 0.18      | 1          | 0.23      | 1          | 0.08      | 1          | 0.28      | 1          | 0.29      | 1          |
| 0.23      | 1          | 0.18      | 1          | 0.19      | 1          | 0.44      | 1          | 0.15      | 1          | 0.34      | 1          |
| 0.20      | 1          | 0.14      | 1          | 0.70      | 1          | 2.44      | 1          | 0.19      | 1          | 0.27      | 1          |
| 0.19      | 1          | 0.19      | 1          | 0.29      | 1          | 0.20      | 1          | 0.17      | 1          | 0.27      | 1          |
| 0.19      | 1          | 0.17      | 1          | 0.27      | 1          | 0.28      | 1          | 0.25      | 1          | 0.28      | 1          |
| 0.17      | 1          | 0.18      | 1          | 0.64      | 1          | 0.21      | 1          | 0.19      | 1          | 0.26      | 1          |
| 0.20      | 1          | 0.19      | 1          | 0.68      | 1          | 0.48      | 1          | 0.18      | 1          | 0.25      | 1          |
| 0.17      | 1          | 0.34      | 1          | 0.25      | 1          | 0.71      | 1          | 0.19      | 1          | 0.27      | 1          |
| 0.18      | 1          | 1.84      | 1          | 0.37      | 1          | 0.24      | 1          | 0.29      | 1          | 4.24      | 1          |
| 0.20      | 1          | 0.20      | 1          | 0.25      | 1          | 2.23      | 1          | 0.40      | 1          | 0.31      | 1          |
| 0.23      | 1          | 0.16      | 1          | 0.21      | 1          | 0.22      | 1          | 0.18      | 1          | 0.09      | 1          |
| 0.20      | 1          | 0.19      | 1          | 0.21      | 1          | 0.24      | 1          | 0.22      | 1          | 0.19      | 1          |
| 0.21      | 1          | 0.18      | 1          | 5.46      | 1          | 0.24      | 1          | 0.19      | 1          | 0.06      | 1          |
| 2.20      | 1          | 0.10      | 1          | 0.32      | 1          | 0.06      | 1          | 0.21      | 1          | 0.19      | 1          |
| 0.21      | 1          | 0.20      | 1          | 0.28      | 1          | 0.47      | 1          | 0.35      | 1          | 0.29      | 1          |
| 0.19      | 1          | 0.28      | 1          | 0.34      | 1          | 0.65      | 1          | 0.29      | 1          | 0.26      | 1          |
| 0.18      | 1          | 0.19      | 1          | 0.27      | 1          | 4.02      | 1          | 0.23      | 1          | 0.26      | 1          |
| 0.18      | 1          | 0.19      | 1          | 0.25      | 1          | 0.20      | 1          | 0.39      | 1          | 0.25      | 1          |
| 0.18      | 1          | 0.19      | 1          | 0.25      | 1          | 2.33      | 1          | 0.19      | 1          | 0.25      | 1          |
| 0.22      | 1          | 0.18      | 1          | 0.35      | 1          | 0.22      | 1          | 0.19      | 1          | 0.11      | 1          |
| 0.13      | 1          | 0.19      | 1          | 0.24      | 1          | 0.23      | 1          | 12.12     | 1          | 0.16      | 1          |

| time<br>A | leuko<br>A | time<br>A | leuko<br>A | time<br>B | leuko<br>B | time<br>C | leuko<br>C | time<br>D | leuko<br>D | time<br>E | leuko<br>E |
|-----------|------------|-----------|------------|-----------|------------|-----------|------------|-----------|------------|-----------|------------|
| 0.15      | 1          | 0.18      | 1          | 0.23      | 1          | 3.36      | 1          | 0.23      | 1          | 0.27      | 1          |
| 3.58      | 1          | 0.20      | 1          | 0.24      | 1          | 0.20      | 1          | 0.20      | 1          | 0.27      | 1          |
| 0.21      | 1          | 0.19      | 1          | 0.29      | 1          | 0.22      | 1          | 0.17      | 1          | 0.26      | 1          |
| 0.21      | 1          | 0.20      | 1          | 0.23      | 1          | 0.21      | 1          | 0.23      | 1          | 0.26      | 1          |
| 0.20      | 1          | 2.00      | 1          | 0.21      | 1          | 0.19      | 1          | 0.19      | 1          | 0.10      | 1          |
| 0.32      | 1          | 0.20      | 1          | 4.59      | 1          | 0.20      | 1          | 0.21      | 1          | 0.18      | 1          |
| 0.21      | 1          | 0.20      | 1          | 0.26      | 1          | 2.60      | 1          | 0.25      | 1          | 4.24      | 1          |
| 0.17      | 1          | 0.19      | 1          | 0.23      | 1          | 0.20      | 1          | 0.23      | 1          | 0.30      | 1          |
| 0.18      | 1          | 0.20      | 1          | 5.14      | 1          | 0.19      | 1          | 0.20      | 1          | 0.10      | 1          |
| 0.18      | 1          | 0.19      | 1          | 0.27      | 1          | 0.19      | 1          | 0.19      | 1          | 0.15      | 1          |
| 0.19      | 1          | 0.20      | 1          | 0.92      | 1          | 0.21      | 1          | 0.18      | 1          | 0.24      | 1          |
| 0.19      | 1          | 0.18      | 1          | 0.27      | 1          | 0.23      | 1          | 0.18      | 1          | 0.25      | 1          |
| 0.20      | 1          | 0.21      | 1          | 0.60      | 1          | 0.19      | 1          | 0.18      | 1          | 0.24      | 1          |
| 0.28      | 1          | 0.21      | 1          | 0.26      | 1          | 0.21      | 1          | 0.27      | 1          | 0.26      | 1          |
| 10.98     | 1          | 0.19      | 1          | 0.23      | 1          | 0.19      | 1          | 0.21      | 1          | 0.30      | 1          |
| 0.23      | 1          | 0.19      | 1          | 0.28      | 1          | 0.25      | 1          | 0.22      | 1          | 0.27      | 1          |
| 0.18      | 1          | 0.23      | 1          | 0.24      | 1          | 2.25      | 1          | 0.19      | 1          | 0.29      | 1          |
| 0.13      | 1          | 0.19      | 1          | 0.22      | 1          | 0.20      | 1          | 0.17      | 1          | 0.25      | 1          |
| 0.17      | 1          | 0.16      | 1          | 0.23      | 1          | 0.30      | 1          | 4.90      | 1          | 0.27      | 1          |
| 0.16      | 1          | 2.12      | 1          | 0.21      | 1          | 0.24      | 1          | 0.24      | 1          | 0.25      | 1          |
| 0.18      | 1          | 0.33      | 1          | 0.28      | 1          | 0.20      | 1          | 0.32      | 1          | 0.32      | 1          |
| 0.18      | 1          | 0.52      | 1          | 0.23      | 1          | 0.19      | 1          | 0.20      | 1          | 5.35      | 1          |
| 0.33      | 1          | 0.21      | 1          | 0.22      | 1          | 0.19      | 1          | 0.17      | 1          | 0.26      | 1          |
| 0.20      | 1          | 0.18      | 1          | 0.22      | 1          | 0.26      | 1          | 0.18      | 1          | 0.07      | 1          |
| 0.18      | 1          | 0.19      | 1          | 0.22      | 1          | 0.25      | 1          | 0.19      | 1          | 0.12      | 1          |
| 0.19      | 1          | 0.22      | 1          | 4.30      | 1          | 0.19      | 1          | 0.18      | 1          | 0.23      | 1          |
| 0.18      | 1          | 0.20      | 1          | 0.27      | 1          | 2.56      | 1          | 0.16      | 1          | 0.25      | 1          |
| 0.19      | 1          | 0.19      | 1          | 0.23      | 1          | 0.21      | 1          | 0.19      | 1          | 0.25      | 1          |
| 0.20      | 1          | 0.16      | 1          | 0.25      | 1          | 0.19      | 1          | 0.17      | 1          | 0.41      | 1          |
| 1.82      | 1          | 4.00      | 1          | 1.62      | 1          | 0.19      | 1          | 0.16      | 1          | 0.27      | 1          |
| 0.19      | 1          | 0.20      | 1          | 0.24      | 1          | 0.37      | 1          | 0.21      | 1          | 0.24      | 1          |
| 0.41      | 1          | 0.18      | 1          | 0.33      | 1          | 0.31      | 1          | 0.18      | 1          | 0.26      | 1          |
| 0.20      | 1          | 0.18      | 1          | 0.23      | 1          | 0.22      | 1          | 0.17      | 1          | 0.25      | 1          |
| 0.12      | 1          | 0.17      | 1          | 0.34      | 1          | 0.23      | 1          | 0.19      | 1          | 0.25      | 1          |
| 0.17      | 1          | 0.19      | 1          | 0.23      | 1          | 0.20      | 1          | 0.33      | 1          | 0.27      | 1          |
| 0.17      | 1          | 0.20      | 1          | 0.41      | 1          | 0.22      | 1          | 0.19      | 1          | 0.27      | 1          |
| 0.16      | 1          | 0.17      | 1          | 0.24      | 1          | 0.26      | 1          | 0.17      | 1          | 0.25      | 1          |
| 0.17      | 1          | 4.67      | 1          | 0.24      | 1          | 0.22      | 1          | 2.04      | 1          | 0.25      | 1          |
| 0.18      | 1          | 0.21      | 1          | 0.22      | 1          | 0.23      | 1          | 0.21      | 1          | 3.73      | 1          |
| 0.15      | 1          | 0.13      | 1          | 0.38      | 1          | 0.30      | 1          | 0.18      | 1          | 0.25      | 1          |
| 0.19      | 1          | 0.28      | 1          | 0.24      | 1          | 0.23      | 1          | 0.18      | 1          | 0.28      | 1          |
| 0.19      | 1          | 0.19      | 1          | 0.23      | 1          | 0.07      | 1          | 0.18      | 1          | 0.29      | 1          |
| 5.01      | 1          | 0.18      | 1          | 0.22      | 1          | 2.34      | 1          | 0.05      | 1          | 0.27      | 1          |
| 0.24      | 1          | 0.18      | 1          | 0.22      | 1          | 0.20      | 1          | 0.11      | 1          | 0.28      | 1          |
| 0.19      | 1          | 0.20      | 1          | 0.34      | 1          | 0.20      | 1          | 0.18      | 1          | 0.27      | 1          |
| 0.21      | 1          | 0.16      | 1          | 0.24      | 1          | 0.25      | 1          | 0.06      | 1          | 0.26      | 1          |
| 0.17      | 1          | 0.18      | 1          | 0.23      | 1          | 0.22      | 1          | 0.11      | 1          | 0.28      | 1          |
| 0.18      | 1          | 1.91      | 1          | 0.29      | 1          | 0.21      | 1          | 0.18      | 1          | 0.28      | 1          |
| 0.18      | 1          | 0.22      | 1          | 0.23      | 1          | 0.21      | 1          | 0.34      | 1          | 0.25      | 1          |
| 0.17      | 1          | 0.19      | 1          | 0.21      | 1          | 0.25      | 1          | 0.22      | 1          | 0.24      | 1          |
| 0.19      | 1          | 0.19      | 1          | 4.16      | 1          | 0.35      | 1          | 0.22      | 1          | 0.26      | 1          |

| time<br>A | leuko<br>A | time<br>A | leuko<br>A | time<br>B | leuko<br>B | time<br>C | leuko<br>C | time<br>D | leuko<br>D | time<br>E | leuko<br>E |
|-----------|------------|-----------|------------|-----------|------------|-----------|------------|-----------|------------|-----------|------------|
| 0.18      | 1          | 0.18      | 1          | 0.25      | 1          | 0.21      | 1          | 0.18      | 1          | 11.45     | 1          |
| 0.20      | 1          | 1.62      | 1          | 0.24      | 1          | 0.06      | 1          | 0.15      | 1          | 0.24      | 1          |
| 2.51      | 1          | 0.23      | 1          | 0.42      | 1          | 0.15      | 1          | 4.99      | 1          | 0.25      | 1          |
| 0.23      | 1          | 0.23      | 1          | 0.25      | 1          | 0.41      | 1          | 0.21      | 1          | 0.25      | 1          |
| 0.17      | 1          | 0.20      | 1          | 0.30      | 1          | 1.80      | 1          | 0.16      | 1          | 0.24      | 1          |
| 0.18      | 1          | 0.19      | 1          | 0.22      | 1          | 0.21      | 1          | 0.23      | 1          | 0.09      | 1          |
| 0.17      | 1          | 1.83      | 1          | 0.23      | 1          | 0.20      | 1          | 0.19      | 1          | 0.13      | 1          |
| 0.19      | 1          | 0.20      | 1          | 0.22      | 1          | 0.19      | 1          | 0.19      | 1          | 0.22      | 1          |
| 0.18      | 1          | 4.30      | 1          | 0.20      | 1          | 0.19      | 1          | 0.19      | 1          | 0.26      | 1          |
| 0.18      | 1          | 0.18      | 1          | 0.29      | 1          | 0.22      | 1          | 0.18      | 1          | 0.25      | 1          |
| 0.20      | 1          | 0.18      | 1          | 0.24      | 1          | 0.21      | 1          | 0.20      | 1          | 0.26      | 1          |
| 0.17      | 1          | 0.16      | 1          | 0.24      | 1          | 0.19      | 1          | 0.20      | 1          | 0.23      | 1          |
| 0.19      | 1          | 0.17      | 1          | 0.22      | 1          | 0.23      | 1          | 0.18      | 1          | 0.24      | 1          |
| 0.19      | 1          | 0.16      | 1          | 5.96      | 1          | 0.38      | 1          | 0.20      | 1          | 0.29      | 1          |
| 0.20      | 1          | 0.17      | 1          | 0.26      | 1          | 0.22      | 1          | 0.18      | 1          | 0.25      | 1          |
| 0.21      | 1          | 0.17      | 1          | 0.20      | 1          | 0.21      | 1          | 0.17      | 1          | 0.25      | 1          |
| 0.20      | 1          | 0.17      | 1          | 0.23      | 1          | 0.24      | 1          | 0.22      | 1          | 0.27      | 1          |
| 0.20      | 1          | 0.17      | 1          | 0.30      | 1          | 0.20      | 1          | 0.20      | 1          | 0.25      | 1          |
| 2.12      | 1          | 0.18      | 1          | 0.22      | 1          | 0.23      | 1          | 0.17      | 1          | 0.26      | 1          |
| 0.49      | 1          | 0.16      | 1          | 0.20      | 1          | 0.20      | 1          | 0.15      | 1          | 0.27      | 1          |
| 0.25      | 1          | 0.07      | 1          | 0.28      | 1          | 0.22      | 1          | 0.14      | 1          | 0.23      | 1          |
| 0.13      | 1          | 0.09      | 1          | 0.22      | 1          | 0.27      | 1          | 0.19      | 1          | 3.21      | 1          |
| 0.22      | 1          | 2.90      | 1          | 0.21      | 1          | 2.11      | 1          | 0.19      | 1          | 0.28      | 1          |
| 0.18      | 1          | 0.19      | 1          | 0.22      | 1          | 0.21      | 1          | 0.19      | 1          | 0.25      | 1          |
| 0.17      | 1          | 0.16      | 1          | 0.75      | 1          | 0.20      | 1          | 0.19      | 1          | 0.28      | 1          |
| 0.18      | 1          | 0.17      | 1          | 3.20      | 1          | 0.19      | 1          | 0.18      | 1          | 0.26      | 1          |
| 0.16      | 1          | 0.17      | 1          | 0.25      | 1          | 0.25      | 1          | 0.19      | 1          | 0.28      | 1          |
| 0.18      | 1          | 0.18      | 1          | 0.22      | 1          | 0.20      | 1          | 0.19      | 1          | 0.28      | 1          |
| 0.16      | 1          | 0.16      | 1          | 0.43      | 1          | 0.19      | 1          | 0.16      | 1          | 0.27      | 1          |
| 0.18      | 1          | 0.19      | 1          | 0.23      | 1          | 0.22      | 1          | 0.19      | 1          | 0.27      | 1          |
| 0.17      | 1          | 0.19      | 1          | 0.21      | 1          | 0.51      | 1          | 0.21      | 1          | 0.28      | 1          |
| 0.17      | 1          | 0.17      | 1          | 0.30      | 1          | 2.02      | 1          | 0.19      | 1          | 0.27      | 1          |
| 0.19      | 1          | 0.18      | 1          | 0.20      | 1          | 0.20      | 1          | 0.18      | 1          | 0.27      | 1          |
| 0.18      | 1          | 2.31      | 1          | 0.70      | 1          | 0.28      | 1          | 0.17      | 1          | 0.29      | 1          |
| 0.12      | 1          | 0.19      | 1          | 0.26      | 1          | 0.21      | 1          | 0.15      | 1          | 2.54      | 1          |
| 0.19      | 1          | 0.17      | 1          | 0.22      | 1          | 0.22      | 1          | 6.09      | 1          | 0.26      | 1          |
| 0.23      | 1          | 0.18      | 1          | 0.20      | 1          | 0.28      | 1          | 0.21      | 1          | 0.27      | 1          |
| 0.23      | 1          | 0.17      | 1          | 0.22      | 1          | 0.21      | 1          | 0.27      | 1          | 0.39      | 1          |
| 2.57      | 1          | 0.36      | 1          | 0.27      | 1          | 0.21      | 1          | 0.19      | 1          | 0.46      | 1          |
| 0.20      | 1          | 0.19      | 1          | 2.92      | 1          | 0.20      | 1          | 0.19      | 1          | 0.20      | 1          |
| 0.18      | 1          | 0.19      | 1          | 0.33      | 1          | 0.24      | 1          | 0.19      | 1          | 0.31      | 1          |
| 0.18      | 1          | 0.17      | 1          | 0.27      | 1          | 0.21      | 1          | 0.19      | 1          | 0.30      | 1          |
| 0.18      | 1          | 0.22      | 1          | 0.38      | 1          | 0.22      | 1          | 0.20      | 1          | 0.27      | 1          |
| 0.17      | 1          | 0.19      | 1          | 0.23      | 1          | 0.19      | 1          | 0.21      | 1          | 0.29      | 1          |
| 0.15      | 1          | 3.80      | 1          | 0.17      | 1          | 0.20      | 1          | 0.24      | 1          | 0.26      | 1          |
| 0.18      | 1          | 0.19      | 1          | 0.22      | 1          | 0.24      | 1          | 0.24      | 1          | 0.24      | 1          |
| 0.15      | 1          | 0.19      | 1          | 0.29      | 1          | 0.21      | 1          | 0.20      | 1          | 0.24      | 1          |
| 0.15      | 1          | 0.18      | 1          | 0.21      | 1          | 2.38      | 1          | 0.16      | 1          | 0.27      | 1          |
| 0.17      | 1          | 0.19      | 1          | 3.90      | 1          | 0.20      | 1          | 0.18      | 1          | 0.26      | 1          |
| 0.19      | 1          | 0.16      | 1          | 4.99      | 1          | 0.25      | 1          | 0.18      | 1          | 0.25      | 1          |
| 0.19      | 1          | 0.17      | 1          | 0.26      | 1          | 0.21      | 1          | 0.19      | 1          | 2.85      | 1          |

| time<br>A | leuko<br>A | time<br>A | leuko<br>A | time<br>B | leuko<br>B | time<br>C | leuko<br>C | time<br>D | leuko<br>D | time<br>E | leuko<br>E |
|-----------|------------|-----------|------------|-----------|------------|-----------|------------|-----------|------------|-----------|------------|
| 0.20      | 1          | 0.17      | 1          | 0.50      | 1          | 0.21      | 1          | 0.17      | 1          | 0.36      | 1          |
| 0.17      | 1          | 0.17      | 1          | 0.26      | 1          | 0.22      | 1          | 0.17      | 1          | 0.79      | 1          |
| 0.20      | 1          | 0.05      | 1          | 0.20      | 1          | 0.23      | 1          | 9.44      | 1          | 0.25      | 1          |
| 0.35      | 1          | 3.41      | 1          | 0.22      | 1          | 0.06      | 1          | 0.20      | 1          | 0.26      | 1          |
| 0.22      | 1          | 0.20      | 1          | 0.24      | 1          | 0.14      | 1          | 0.16      | 1          | 0.28      | 1          |
| 0.19      | 1          | 0.19      | 1          | 0.29      | 1          | 0.25      | 1          | 0.28      | 1          | 0.27      | 1          |
| 2.52      | 1          | 0.18      | 1          | 0.21      | 1          | 0.22      | 1          | 0.18      | 1          | 0.24      | 1          |
| 0.23      | 1          | 0.18      | 1          | 0.29      | 1          | 0.19      | 1          | 0.20      | 1          | 1.87      | 1          |
| 0.26      | 1          | 0.18      | 1          | 0.21      | 1          | 0.21      | 1          | 0.17      | 1          | 0.27      | 1          |
| 0.23      | 1          | 0.18      | 1          | 0.22      | 1          | 0.25      | 1          | 0.18      | 1          | 0.26      | 1          |
| 0.18      | 1          | 0.34      | 1          | 0.20      | 1          | 0.38      | 1          | 0.17      | 1          | 0.24      | 1          |
| 0.20      | 1          | 0.20      | 1          | 0.29      | 1          | 0.32      | 1          | 0.17      | 1          | 0.25      | 1          |
| 0.18      | 1          | 0.17      | 1          | 0.20      | 1          | 0.23      | 1          | 0.33      | 1          | 0.27      | 1          |
| 0.17      | 1          | 0.18      | 1          | 2.31      | 1          | 0.25      | 1          | 0.20      | 1          | 0.25      | 1          |
| 0.19      | 1          | 4.55      | 1          | 0.28      | 1          | 0.24      | 1          | 0.19      | 1          | 0.24      | 1          |
| 0.18      | 1          | 0.22      | 1          | 0.24      | 1          | 0.38      | 1          | 0.20      | 1          | 2.07      | 1          |
| 0.18      | 1          | 0.20      | 1          | 0.23      | 1          | 0.53      | 1          | 0.17      | 1          | 0.30      | 1          |
| 0.21      | 1          | 0.13      | 1          | 0.30      | 1          | 0.29      | 1          | 0.23      | 1          | 0.24      | 1          |
| 0.27      | 1          | 0.22      | 1          | 0.22      | 1          | 0.07      | 1          | 0.18      | 1          | 0.25      | 1          |
| 2.29      | 1          | 0.18      | 1          | 0.23      | 1          | 0.14      | 1          | 0.19      | 1          | 0.28      | 1          |
| 0.21      | 1          | 0.18      | 1          | 0.74      | 1          | 0.22      | 1          | 0.16      | 1          | 0.24      | 1          |
| 0.18      | 1          | 0.21      | 1          | 0.26      | 1          | 0.23      | 1          | 0.25      | 1          | 0.28      | 1          |
| 0.17      | 1          | 0.28      | 1          | 0.20      | 1          | 0.23      | 1          | 0.31      | 1          | 0.29      | 1          |
| 0.19      | 1          | 0.22      | 1          | 0.21      | 1          | 0.24      | 1          | 0.21      | 1          | 0.23      | 1          |
| 0.18      | 1          | 0.17      | 1          | 0.26      | 1          | 0.22      | 1          | 0.19      | 1          | 0.24      | 1          |
| 0.19      | 1          | 0.22      | 1          | 0.22      | 1          | 2.62      | 1          | 0.20      | 1          | 0.28      | 1          |
| 0.20      | 1          | 0.21      | 1          | 0.24      | 1          | 0.22      | 1          | 0.18      | 1          | 0.24      | 1          |
| 0.18      | 1          | 0.21      | 1          | 0.21      | 1          | 0.21      | 1          | 0.20      | 1          | 0.26      | 1          |
| 0.20      | 1          | 2.59      | 1          | 0.30      | 1          | 0.08      | 1          | 0.20      | 1          | 4.59      | 1          |
| 0.19      | 1          | 0.22      | 1          | 0.21      | 1          | 0.14      | 1          | 0.18      | 1          | 1.22      | 1          |
| 0.20      | 1          | 0.16      | 1          | 2.80      | 1          | 0.21      | 1          | 0.18      | 1          | 0.31      | 1          |
| 3.42      | 1          | 0.21      | 1          | 0.27      | 1          | 0.21      | 1          | 0.16      | 1          | 0.27      | 1          |
| 0.22      | 1          | 0.17      | 1          | 0.47      | 1          | 0.20      | 1          | 0.17      | 1          | 1.02      | 1          |
| 0.19      | 1          | 0.19      | 1          | 0.24      | 1          | 0.19      | 1          | 5.51      | 1          | 0.22      | 1          |
| 0.17      | 1          | 0.18      | 1          | 0.22      | 1          | 0.22      | 1          | 0.21      | 1          | 0.27      | 1          |
| 0.17      | 1          | 0.18      | 1          | 0.21      | 1          | 0.20      | 1          | 0.19      | 1          | 0.25      | 1          |
| 0.18      | 1          | 0.19      | 1          | 0.18      | 1          | 0.23      | 1          | 0.19      | 1          | 0.25      | 1          |
| 0.17      | 1          | 0.17      | 1          | 0.36      | 1          | 0.23      | 1          | 0.19      | 1          | 3.86      | 1          |
| 0.15      | 1          | 0.18      | 1          | 0.20      | 1          | 0.21      | 1          | 0.18      | 1          | 0.31      | 1          |
| 0.19      | 1          | 0.20      | 1          | 0.21      | 1          | 5.97      | 1          | 0.19      | 1          | 0.43      | 1          |
| 0.18      | 1          | 2.41      | 1          | 0.22      | 1          | 0.24      | 1          | 0.20      | 1          | 0.30      | 1          |
| 0.18      | 1          | 0.24      | 1          | 0.21      | 1          | 0.20      | 1          | 0.20      | 1          | 0.27      | 1          |
| 0.16      | 1          | 0.19      | 1          | 2.77      | 1          | 0.20      | 1          | 0.17      | 1          | 0.25      | 1          |
| 0.21      | 1          | 0.17      | 1          | 0.29      | 1          | 0.20      | 1          | 0.20      | 1          | 0.28      | 1          |
| 0.20      | 1          | 0.19      | 1          | 0.28      | 1          | 0.21      | 1          | 0.19      | 1          | 0.25      | 1          |
| 0.29      | 1          | 0.19      | 1          | 0.26      | 1          | 0.19      | 1          | 0.17      | 1          | 0.25      | 1          |
| 0.19      | 1          | 0.20      | 1          | 0.37      | 1          | 0.20      | 1          | 0.19      | 1          | 0.27      | 1          |
| 0.18      | 1          | 0.18      | 1          | 0.27      | 1          | 0.20      | 1          | 0.19      | 1          | 3.61      | 1          |
| 0.20      | 1          | 0.21      | 1          | 0.24      | 1          | 0.28      | 1          | 0.16      | 1          | 0.33      | 1          |
| 0.20      | 1          | 0.16      | 1          | 0.31      | 1          | 0.21      | 1          | 0.19      | 1          | 0.26      | 1          |
| 0.16      | 1          | 1.85      | 1          | 0.24      | 1          | 0.25      | 1          | 0.18      | 1          | 0.29      | 1          |



| time<br>A | leuko<br>A | time<br>A | leuko<br>A | time<br>B | leuko<br>B | time<br>C | leuko<br>C | time<br>D | leuko<br>D | time<br>E | leuko<br>E |
|-----------|------------|-----------|------------|-----------|------------|-----------|------------|-----------|------------|-----------|------------|
| 1.84      | 1          | 0.22      | 1          | 0.31      | 1          | 0.08      | 1          | 0.18      | 1          | 0.27      | 1          |
| 0.20      | 1          | 0.17      | 1          | 0.24      | 1          | 0.15      | 1          | 0.18      | 1          | 0.28      | 1          |
| 0.17      | 1          | 0.19      | 1          | 0.24      | 1          | 0.22      | 1          | 0.19      | 1          | 0.22      | 1          |
| 0.18      | 1          | 0.18      | 1          | 0.22      | 1          | 0.21      | 1          | 0.17      | 1          | 3.70      | 1          |
| 0.17      | 1          | 0.21      | 1          | 0.50      | 1          | 0.20      | 1          | 0.18      | 1          | 0.27      | 1          |
| 0.17      | 1          | 0.19      | 1          | 0.27      | 1          | 0.23      | 1          | 0.22      | 1          | 0.29      | 1          |
| 0.18      | 1          | 0.19      | 1          | 0.28      | 1          | 0.20      | 1          | 6.75      | 1          | 0.25      | 1          |
| 0.18      | 1          | 0.19      | 1          | 0.25      | 1          | 2.39      | 1          | 0.18      | 1          | 0.25      | 1          |
| 0.22      | 1          | 0.18      | 1          | 0.21      | 1          | 0.20      | 1          | 0.20      | 1          | 0.27      | 1          |
| 0.18      | 1          | 0.19      | 1          | 0.22      | 1          | 0.20      | 1          | 0.19      | 1          | 0.29      | 1          |
| 0.18      | 1          | 0.27      | 1          | 3.65      | 1          | 0.21      | 1          | 0.20      | 1          | 0.27      | 1          |
| 0.18      | 1          | 0.12      | 1          | 0.28      | 1          | 0.20      | 1          | 0.16      | 1          | 0.25      | 1          |
| 0.18      | 1          | 0.17      | 1          | 0.24      | 1          | 0.56      | 1          | 0.19      | 1          | 0.25      | 1          |
| 2.05      | 1          | 0.18      | 1          | 0.23      | 1          | 0.21      | 1          | 0.18      | 1          | 0.27      | 1          |
| 0.24      | 1          | 0.22      | 1          | 0.31      | 1          | 4.90      | 1          | 0.20      | 1          | 0.30      | 1          |
| 0.24      | 1          | 3.66      | 1          | 0.23      | 1          | 0.23      | 1          | 0.20      | 1          | 2.99      | 1          |
| 0.17      | 1          | 0.23      | 1          | 0.22      | 1          | 0.21      | 1          | 0.21      | 1          | 0.24      | 1          |
| 0.21      | 1          | 0.20      | 1          | 0.35      | 1          | 0.22      | 1          | 0.19      | 1          | 0.28      | 1          |
| 0.19      | 1          | 0.17      | 1          | 0.23      | 1          | 0.19      | 1          | 0.17      | 1          | 0.25      | 1          |
| 0.17      | 1          | 0.19      | 1          | 0.21      | 1          | 0.20      | 1          | 0.22      | 1          | 0.28      | 1          |
| 0.18      | 1          | 0.20      | 1          | 3.61      | 1          | 0.21      | 1          | 0.17      | 1          | 0.29      | 1          |
| 0.14      | 1          | 0.17      | 1          | 0.27      | 1          | 0.05      | 1          | 0.20      | 1          | 0.27      | 1          |
| 0.18      | 1          | 0.19      | 1          | 0.25      | 1          | 0.08      | 1          | 0.18      | 1          | 2.90      | 1          |
| 0.17      | 1          | 0.19      | 1          | 0.25      | 1          | 0.21      | 1          | 0.20      | 1          | 0.35      | 1          |
| 0.32      | 1          | 0.23      | 1          | 0.23      | 1          | 0.20      | 1          | 0.20      | 1          | 0.30      | 1          |
| 0.19      | 1          | 0.15      | 1          | 0.23      | 1          | 0.21      | 1          | 0.19      | 1          | 0.24      | 1          |
| 0.18      | 1          | 0.18      | 1          | 0.22      | 1          | 0.28      | 1          | 0.22      | 1          | 0.28      | 1          |
| 0.14      | 1          | 0.20      | 1          | 0.32      | 1          | 0.25      | 1          | 0.20      | 1          | 0.25      | 1          |
| 3.14      | 1          | 0.18      | 1          | 0.31      | 1          | 0.23      | 1          | 0.20      | 1          | 0.27      | 1          |
| 0.21      | 1          | 2.79      | 1          | 0.28      | 1          | 0.23      | 1          | 0.19      | 1          | 0.29      | 1          |
| 0.18      | 1          | 0.20      | 1          | 0.33      | 1          | 0.22      | 1          | 4.14      | 1          | 0.28      | 1          |
| 0.18      | 1          | 0.17      | 1          | 0.26      | 1          | 2.66      | 1          | 0.17      | 1          | 1.97      | 1          |
| 0.20      | 1          | 0.18      | 1          | 0.25      | 1          | 0.20      | 1          | 0.18      | 1          | 0.26      | 1          |
| 0.16      | 1          | 0.17      | 1          | 0.25      | 1          | 0.20      | 1          | 0.20      | 1          | 0.31      | 1          |
| 0.34      | 1          | 0.19      | 1          | 0.33      | 1          | 0.08      | 1          | 0.21      | 1          | 2.20      | 1          |
| 0.28      | 1          | 0.18      | 1          | 0.49      | 1          | 0.12      | 1          | 0.23      | 1          | 0.33      | 1          |
| 0.23      | 1          | 0.18      | 1          | 0.27      | 1          | 0.31      | 1          | 0.21      | 1          | 0.28      | 1          |
| 0.19      | 1          | 0.19      | 1          | 0.25      | 1          | 0.26      | 1          | 0.19      | 1          | 0.28      | 1          |
| 0.17      | 1          | 0.19      | 1          | 0.29      | 1          | 0.34      | 1          | 0.19      | 1          | 0.29      | 1          |
| 0.18      | 1          | 0.20      | 1          | 7.15      | 1          | 3.07      | 1          | 0.16      | 1          | 0.25      | 1          |
| 0.20      | 1          | 3.74      | 1          | 0.24      | 1          | 0.19      | 1          | 0.18      | 1          | 0.26      | 1          |
| 0.17      | 1          | 0.23      | 1          | 0.24      | 1          | 0.20      | 1          | 0.19      | 1          | 0.30      | 1          |
| 0.16      | 1          | 0.19      | 1          | 0.24      | 1          | 0.14      | 1          | 0.18      | 1          | 2.79      | 1          |
| 0.20      | 1          | 0.18      | 1          | 0.22      | 1          | 0.23      | 1          | 4.06      | 1          | 0.24      | 1          |
| 0.19      | 1          | 0.18      | 1          | 0.20      | 1          | 0.20      | 1          | 0.20      | 1          | 0.28      | 1          |
| 1.93      | 1          | 0.20      | 1          | 0.26      | 1          | 0.19      | 1          | 0.22      | 1          | 0.25      | 1          |
| 0.25      | 1          | 0.18      | 1          | 0.22      | 1          | 0.42      | 1          | 0.39      | 1          | 0.24      | 1          |
| 0.19      | 1          | 0.17      | 1          | 0.22      | 1          | 0.22      | 1          | 0.19      | 1          | 0.24      | 1          |
| 0.16      | 1          | 0.18      | 1          | 0.20      | 1          | 0.23      | 1          | 0.32      | 1          | 0.25      | 1          |
| 0.20      | 1          | 0.17      | 1          | 0.32      | 1          | 0.25      | 1          | 0.21      | 1          | 0.10      | 1          |
| 0.26      | 1          | 0.17      | 1          | 0.26      | 1          | 0.28      | 1          | 0.19      | 1          | 0.18      | 1          |

| time<br>A | leuko<br>A | time<br>A | leuko<br>A | time<br>B | leuko<br>B | time<br>C | leuko<br>C | time<br>D | leuko<br>D | time<br>E | leuko<br>E |
|-----------|------------|-----------|------------|-----------|------------|-----------|------------|-----------|------------|-----------|------------|
| 0.22      | 1          | 0.18      | 1          | 0.22      | 1          | 0.20      | 1          | 0.27      | 1          | NA        | NA         |
| 0.18      | 1          | 0.18      | 1          | 0.23      | 1          | 0.28      | 1          | 0.19      | 1          | NA        | NA         |
| 0.17      | 1          | 0.20      | 1          | 0.24      | 1          | 0.23      | 1          | 0.21      | 1          | NA        | NA         |
| 0.19      | 1          | 0.17      | 1          | 0.25      | 1          | 2.43      | 1          | 0.19      | 1          | NA        | NA         |
| 0.18      | 1          | 0.21      | 1          | NA        | NA         | 0.21      | 1          | 0.21      | 1          | NA        | NA         |
| 0.18      | 1          | 0.17      | 1          | NA        | NA         | 0.23      | 1          | 0.17      | 1          | NA        | NA         |
| 0.41      | 1          | 0.16      | 1          | NA        | NA         | 0.20      | 1          | 0.22      | 1          | NA        | NA         |
| NA        | NA         | 0.18      | 1          | NA        | NA         | 0.19      | 1          | 0.18      | 1          | NA        | NA         |
| NA        | NA         | NA        | NA         | NA        | NA         | 0.25      | 1          | 0.19      | 1          | NA        | NA         |
| NA        | NA         | NA        | NA         | NA        | NA         | 0.21      | 1          | 0.19      | 1          | NA        | NA         |
| NA        | NA         | NA        | NA         | NA        | NA         | 0.21      | 1          | 0.18      | 1          | NA        | NA         |
| NA        | NA         | NA        | NA         | NA        | NA         | 0.23      | 1          | 0.18      | 1          | NA        | NA         |
| NA        | NA         | NA        | NA         | NA        | NA         | 0.22      | 1          | 0.18      | 1          | NA        | NA         |
| NA        | NA         | NA        | NA         | NA        | NA         | 0.20      | 1          | 0.23      | 1          | NA        | NA         |
| NA        | NA         | NA        | NA         | NA        | NA         | 0.20      | 1          | 0.28      | 1          | NA        | NA         |
| NA        | NA         | NA        | NA         | NA        | NA         | 0.21      | 1          | 0.20      | 1          | NA        | NA         |
| NA        | NA         | NA        | NA         | NA        | NA         | 0.21      | 1          | 0.19      | 1          | NA        | NA         |
| NA        | NA         | NA        | NA         | NA        | NA         | 0.18      | 1          | 0.17      | 1          | NA        | NA         |
| NA        | NA         | NA        | NA         | NA        | NA         | 2.19      | 1          | 0.17      | 1          | NA        | NA         |
| NA        | NA         | NA        | NA         | NA        | NA         | 0.19      | 1          | 0.17      | 1          | NA        | NA         |
| NA        | NA         | NA        | NA         | NA        | NA         | 0.06      | 1          | NA        | NA         | NA        | NA         |
| NA        | NA         | NA        | NA         | NA        | NA         | 0.13      | 1          | NA        | NA         | NA        | NA         |
| NA        | NA         | NA        | NA         | NA        | NA         | 0.23      | 1          | NA        | NA         | NA        | NA         |
| NA        | NA         | NA        | NA         | NA        | NA         | 0.19      | 1          | NA        | NA         | NA        | NA         |
| NA        | NA         | NA        | NA         | NA        | NA         | 0.21      | 1          | NA        | NA         | NA        | NA         |
| NA        | NA         | NA        | NA         | NA        | NA         | 0.51      | 1          | NA        | NA         | NA        | NA         |
| NA        | NA         | NA        | NA         | NA        | NA         | 0.20      | 1          | NA        | NA         | NA        | NA         |
| NA        | NA         | NA        | NA         | NA        | NA         | 0.22      | 1          | NA        | NA         | NA        | NA         |
| NA        | NA         | NA        | NA         | NA        | NA         | 0.07      | 1          | NA        | NA         | NA        | NA         |
| NA        | NA         | NA        | NA         | NA        | NA         | 0.12      | 1          | NA        | NA         | NA        | NA         |
| NA        | NA         | NA        | NA         | NA        | NA         | 0.06      | 1          | NA        | NA         | NA        | NA         |
| NA        | NA         | NA        | NA         | NA        | NA         | 0.11      | 1          | NA        | NA         | NA        | NA         |
| NA        | NA         | NA        | NA         | NA        | NA         | 0.26      | 1          | NA        | NA         | NA        | NA         |
| NA        | NA         | NA        | NA         | NA        | NA         | 0.21      | 1          | NA        | NA         | NA        | NA         |
| NA        | NA         | NA        | NA         | NA        | NA         | 0.43      | 1          | NA        | NA         | NA        | NA         |
| NA        | NA         | NA        | NA         | NA        | NA         | 2.13      | 1          | NA        | NA         | NA        | NA         |
| NA        | NA         | NA        | NA         | NA        | NA         | 0.20      | 1          | NA        | NA         | NA        | NA         |
| NA        | NA         | NA        | NA         | NA        | NA         | 0.20      | 1          | NA        | NA         | NA        | NA         |
| NA        | NA         | NA        | NA         | NA        | NA         | 0.32      | 1          | NA        | NA         | NA        | NA         |
| NA        | NA         | NA        | NA         | NA        | NA         | 0.21      | 1          | NA        | NA         | NA        | NA         |
| NA        | NA         | NA        | NA         | NA        | NA         | 0.28      | 1          | NA        | NA         | NA        | NA         |
| NA        | NA         | NA        | NA         | NA        | NA         | 0.21      | 1          | NA        | NA         | NA        | NA         |
| NA        | NA         | NA        | NA         | NA        | NA         | 0.23      | 1          | NA        | NA         | NA        | NA         |
| NA        | NA         | NA        | NA         | NA        | NA         | 0.22      | 1          | NA        | NA         | NA        | NA         |
| NA        | NA         | NA        | NA         | NA        | NA         | 0.21      | 1          | NA        | NA         | NA        | NA         |
| NA        | NA         | NA        | NA         | NA        | NA         | 0.22      | 1          | NA        | NA         | NA        | NA         |
| NA        | NA         | NA        | NA         | NA        | NA         | 0.28      | 1          | NA        | NA         | NA        | NA         |
| NA        | NA         | NA        | NA         | NA        | NA         | 0.07      | 1          | NA        | NA         | NA        | NA         |
| NA        | NA         | NA        | NA         | NA        | NA         | 0.12      | 1          | NA        | NA         | NA        | NA         |
| NA        | NA         | NA        | NA         | NA        | NA         | 0.23      | 1          | NA        | NA         | NA        | NA         |
| NA        | NA         | NA        | NA         | NA        | NA         | 0.18      | 1          | NA        | NA         | NA        | NA         |

| time<br>A | leuko<br>A | time<br>A | leuko<br>A | time<br>B | leuko<br>B | time<br>C | leuko<br>C | time<br>D | leuko<br>D | time<br>E | leuko<br>E |
|-----------|------------|-----------|------------|-----------|------------|-----------|------------|-----------|------------|-----------|------------|
| NA        | NA         | NA        | NA         | NA        | NA         | 0.24      | 1          | NA        | NA         | NA        | NA         |
| NA        | NA         | NA        | NA         | NA        | NA         | 2.77      | 1          | NA        | NA         | NA        | NA         |
| NA        | NA         | NA        | NA         | NA        | NA         | 0.20      | 1          | NA        | NA         | NA        | NA         |
| NA        | NA         | NA        | NA         | NA        | NA         | 0.20      | 1          | NA        | NA         | NA        | NA         |
| NA        | NA         | NA        | NA         | NA        | NA         | 0.22      | 1          | NA        | NA         | NA        | NA         |
| NA        | NA         | NA        | NA         | NA        | NA         | 0.27      | 1          | NA        | NA         | NA        | NA         |
| NA        | NA         | NA        | NA         | NA        | NA         | 0.45      | 1          | NA        | NA         | NA        | NA         |
| NA        | NA         | NA        | NA         | NA        | NA         | 0.33      | 1          | NA        | NA         | NA        | NA         |
| NA        | NA         | NA        | NA         | NA        | NA         | 0.04      | 1          | NA        | NA         | NA        | NA         |
| NA        | NA         | NA        | NA         | NA        | NA         | 0.39      | 1          | NA        | NA         | NA        | NA         |
| NA        | NA         | NA        | NA         | NA        | NA         | 0.21      | 1          | NA        | NA         | NA        | NA         |
| NA        | NA         | NA        | NA         | NA        | NA         | 2.22      | 1          | NA        | NA         | NA        | NA         |
| NA        | NA         | NA        | NA         | NA        | NA         | 0.23      | 1          | NA        | NA         | NA        | NA         |
| NA        | NA         | NA        | NA         | NA        | NA         | 0.27      | 1          | NA        | NA         | NA        | NA         |
| NA        | NA         | NA        | NA         | NA        | NA         | 0.01      | 1          | NA        | NA         | NA        | NA         |
| NA        | NA         | NA        | NA         | NA        | NA         | 0.18      | 1          | NA        | NA         | NA        | NA         |
| NA        | NA         | NA        | NA         | NA        | NA         | 0.36      | 1          | NA        | NA         | NA        | NA         |
| NA        | NA         | NA        | NA         | NA        | NA         | 0.20      | 1          | NA        | NA         | NA        | NA         |
| NA        | NA         | NA        | NA         | NA        | NA         | 0.21      | 1          | NA        | NA         | NA        | NA         |
| NA        | NA         | NA        | NA         | NA        | NA         | 0.23      | 1          | NA        | NA         | NA        | NA         |
| NA        | NA         | NA        | NA         | NA        | NA         | 0.20      | 1          | NA        | NA         | NA        | NA         |
| NA        | NA         | NA        | NA         | NA        | NA         | 0.28      | 1          | NA        | NA         | NA        | NA         |
| NA        | NA         | NA        | NA         | NA        | NA         | 0.23      | 1          | NA        | NA         | NA        | NA         |
| NA        | NA         | NA        | NA         | NA        | NA         | 0.06      | 1          | NA        | NA         | NA        | NA         |
| NA        | NA         | NA        | NA         | NA        | NA         | 0.12      | 1          | NA        | NA         | NA        | NA         |
| NA        | NA         | NA        | NA         | NA        | NA         | 0.23      | 1          | NA        | NA         | NA        | NA         |
| NA        | NA         | NA        | NA         | NA        | NA         | 0.22      | 1          | NA        | NA         | NA        | NA         |
| NA        | NA         | NA        | NA         | NA        | NA         | 0.27      | 1          | NA        | NA         | NA        | NA         |
| NA        | NA         | NA        | NA         | NA        | NA         | 0.23      | 1          | NA        | NA         | NA        | NA         |
| NA        | NA         | NA        | NA         | NA        | NA         | 0.21      | 1          | NA        | NA         | NA        | NA         |
| NA        | NA         | NA        | NA         | NA        | NA         | 0.25      | 1          | NA        | NA         | NA        | NA         |
| NA        | NA         | NA        | NA         | NA        | NA         | 0.06      | 1          | NA        | NA         | NA        | NA         |
| NA        | NA         | NA        | NA         | NA        | NA         | 0.13      | 1          | NA        | NA         | NA        | NA         |
| NA        | NA         | NA        | NA         | NA        | NA         | 0.23      | 1          | NA        | NA         | NA        | NA         |
| NA        | NA         | NA        | NA         | NA        | NA         | 2.12      | 1          | NA        | NA         | NA        | NA         |
| NA        | NA         | NA        | NA         | NA        | NA         | 0.19      | 1          | NA        | NA         | NA        | NA         |
| NA        | NA         | NA        | NA         | NA        | NA         | 0.06      | 1          | NA        | NA         | NA        | NA         |
| NA        | NA         | NA        | NA         | NA        | NA         | 0.12      | 1          | NA        | NA         | NA        | NA         |
| NA        | NA         | NA        | NA         | NA        | NA         | 0.19      | 1          | NA        | NA         | NA        | NA         |
| NA        | NA         | NA        | NA         | NA        | NA         | 0.19      | 1          | NA        | NA         | NA        | NA         |
| NA        | NA         | NA        | NA         | NA        | NA         | 0.22      | 1          | NA        | NA         | NA        | NA         |
| NA        | NA         | NA        | NA         | NA        | NA         | 0.20      | 1          | NA        | NA         | NA        | NA         |
| NA        | NA         | NA        | NA         | NA        | NA         | 0.20      | 1          | NA        | NA         | NA        | NA         |
| NA        | NA         | NA        | NA         | NA        | NA         | 0.19      | 1          | NA        | NA         | NA        | NA         |
| NA        | NA         | NA        | NA         | NA        | NA         | 0.07      | 1          | NA        | NA         | NA        | NA         |
| NA        | NA         | NA        | NA         | NA        | NA         | 0.13      | 1          | NA        | NA         | NA        | NA         |
| NA        | NA         | NA        | NA         | NA        | NA         | 0.21      | 1          | NA        | NA         | NA        | NA         |
| NA        | NA         | NA        | NA         | NA        | NA         | 0.23      | 1          | NA        | NA         | NA        | NA         |
| NA        | NA         | NA        | NA         | NA        | NA         | 0.23      | 1          | NA        | NA         | NA        | NA         |
| NA        | NA         | NA        | NA         | NA        | NA         | 0.26      | 1          | NA        | NA         | NA        | NA         |
| NA        | NA         | NA        | NA         | NA        | NA         | 0.23      | 1          | NA        | NA         | NA        | NA         |

| time<br>A | leuko<br>A | time<br>A | leuko<br>A | time<br>B | leuko<br>B | time<br>C | leuko<br>C | time<br>D | leuko<br>D | time<br>E | leuko<br>E |
|-----------|------------|-----------|------------|-----------|------------|-----------|------------|-----------|------------|-----------|------------|
| NA        | NA         | NA        | NA         | NA        | NA         | 0.30      | 1          | NA        | NA         | NA        | NA         |
| NA        | NA         | NA        | NA         | NA        | NA         | 0.23      | 1          | NA        | NA         | NA        | NA         |
| NA        | NA         | NA        | NA         | NA        | NA         | 0.26      | 1          | NA        | NA         | NA        | NA         |
| NA        | NA         | NA        | NA         | NA        | NA         | 0.23      | 1          | NA        | NA         | NA        | NA         |
| NA        | NA         | NA        | NA         | NA        | NA         | 0.22      | 1          | NA        | NA         | NA        | NA         |
| NA        | NA         | NA        | NA         | NA        | NA         | 0.22      | 1          | NA        | NA         | NA        | NA         |
| NA        | NA         | NA        | NA         | NA        | NA         | 0.09      | 1          | NA        | NA         | NA        | NA         |
| NA        | NA         | NA        | NA         | NA        | NA         | 0.30      | 1          | NA        | NA         | NA        | NA         |

## 1.4 OPT211

Table 4: Raw data of TBS OPT211.

| time<br>A | leuko<br>A | time<br>A | leuko<br>A | time<br>B | leuko<br>B | time<br>C | leuko<br>C | time<br>D | leuko<br>D | time<br>E | leuko<br>E |
|-----------|------------|-----------|------------|-----------|------------|-----------|------------|-----------|------------|-----------|------------|
| 0.00      | 0          | 0.00      | 1          | 0.00      | 1          | 0.00      | 0          | 0.00      | 0          | 0.00      | 1          |
| 0.28      | 0          | 0.29      | 1          | 0.69      | 1          | 0.59      | 0          | 0.20      | 0          | 0.27      | 1          |
| 0.21      | 0          | 0.25      | 1          | 0.52      | 1          | 3.37      | 0          | 0.20      | 0          | 0.29      | 1          |
| 3.42      | 0          | 3.35      | 0          | 1.11      | 1          | 0.27      | 0          | 0.21      | 0          | 0.46      | 1          |
| 0.26      | 0          | 0.27      | 0          | 0.69      | 1          | 0.25      | 0          | 0.64      | 0          | 2.93      | 0          |
| 0.20      | 0          | 0.24      | 0          | 1.00      | 1          | 0.65      | 0          | 0.21      | 0          | 0.26      | 0          |
| 0.20      | 0          | 0.28      | 0          | 0.77      | 1          | 0.31      | 0          | 0.19      | 0          | 0.26      | 0          |
| 0.19      | 0          | 0.24      | 0          | 0.99      | 1          | 0.31      | 0          | 0.59      | 0          | 0.59      | 0          |
| 0.21      | 0          | 0.21      | 0          | 0.88      | 1          | 3.21      | 0          | 0.20      | 0          | 0.26      | 0          |
| 0.17      | 0          | 0.23      | 0          | 0.64      | 1          | 0.29      | 0          | 0.24      | 0          | 0.21      | 0          |
| 0.20      | 0          | 0.25      | 0          | 1.37      | 1          | 0.24      | 0          | 0.19      | 0          | 0.48      | 0          |
| 0.21      | 0          | 0.25      | 0          | 0.67      | 1          | 0.46      | 0          | 0.28      | 0          | 0.27      | 0          |
| 5.49      | 0          | 0.25      | 0          | 6.15      | 0          | 0.35      | 0          | 0.22      | 0          | 0.23      | 0          |
| 0.24      | 0          | 0.21      | 0          | 0.27      | 0          | 0.45      | 0          | 0.22      | 0          | 0.23      | 0          |
| 0.19      | 0          | 0.21      | 0          | 0.24      | 0          | 0.24      | 0          | 0.19      | 0          | 0.43      | 0          |
| 0.17      | 0          | 0.24      | 0          | 0.26      | 0          | 0.38      | 0          | 0.20      | 0          | 0.29      | 0          |
| 0.19      | 0          | 0.23      | 0          | 0.20      | 0          | 0.31      | 0          | 0.19      | 0          | 0.23      | 0          |
| 0.20      | 0          | 0.23      | 0          | 0.33      | 0          | 0.25      | 0          | 0.23      | 0          | 0.40      | 0          |
| 0.26      | 0          | 0.21      | 0          | 0.21      | 0          | 1.95      | 0          | 0.19      | 0          | 0.29      | 0          |
| 0.19      | 0          | 0.22      | 0          | 0.22      | 0          | 0.28      | 0          | 0.22      | 0          | 0.39      | 0          |
| 0.17      | 0          | 0.24      | 0          | 0.22      | 0          | 0.22      | 0          | 0.22      | 0          | 0.29      | 0          |
| 0.18      | 0          | 0.22      | 0          | 0.21      | 0          | 0.28      | 0          | 0.21      | 0          | 0.23      | 0          |
| 0.16      | 0          | 0.21      | 0          | 0.29      | 0          | 0.25      | 0          | 0.18      | 0          | 0.24      | 0          |
| 0.16      | 0          | 0.20      | 0          | 0.24      | 0          | 0.24      | 0          | 0.21      | 0          | 0.19      | 0          |
| 0.16      | 0          | 0.21      | 0          | 0.25      | 0          | 0.22      | 0          | 0.19      | 0          | 0.20      | 0          |
| 0.17      | 0          | 0.32      | 0          | 0.23      | 0          | 0.31      | 0          | 0.20      | 0          | 0.22      | 0          |
| 0.18      | 0          | 0.21      | 0          | 0.22      | 0          | 0.24      | 0          | 0.22      | 0          | 0.24      | 0          |
| 0.16      | 0          | 0.21      | 0          | 0.27      | 0          | 0.22      | 0          | 0.32      | 0          | 0.25      | 0          |
| 0.18      | 0          | 0.19      | 0          | 0.24      | 0          | 0.25      | 0          | 0.23      | 0          | 0.18      | 0          |
| 0.16      | 0          | 0.21      | 0          | 0.24      | 0          | 0.30      | 0          | 0.24      | 0          | 0.23      | 0          |
| 0.21      | 0          | 0.22      | 0          | 0.22      | 0          | 0.23      | 0          | 0.22      | 0          | 0.22      | 0          |
| 0.29      | 0          | 0.18      | 0          | 0.23      | 0          | 0.23      | 0          | 0.23      | 0          | 0.19      | 0          |
| 0.18      | 0          | 0.19      | 0          | 0.26      | 0          | 0.44      | 0          | 0.22      | 0          | 0.21      | 0          |
| 0.20      | 0          | 0.19      | 0          | 0.24      | 0          | 0.35      | 0          | 0.21      | 0          | 0.45      | 0          |
| 0.21      | 0          | 0.19      | 0          | 0.23      | 0          | 0.35      | 0          | 0.21      | 0          | 0.26      | 0          |
| 0.20      | 0          | 0.17      | 0          | 0.23      | 0          | 0.23      | 0          | 0.22      | 0          | 0.19      | 0          |
| 0.17      | 0          | 0.15      | 0          | 0.24      | 0          | 0.21      | 0          | 0.22      | 0          | 0.19      | 0          |
| 0.18      | 0          | 0.19      | 0          | 0.25      | 0          | 0.38      | 0          | 0.19      | 0          | 1.79      | 0          |
| 0.17      | 0          | 0.19      | 0          | 0.24      | 0          | 0.23      | 0          | 0.20      | 0          | 0.26      | 0          |
| 0.17      | 0          | 0.19      | 0          | 0.23      | 0          | 0.43      | 0          | 0.20      | 0          | 0.64      | 0          |
| 0.18      | 0          | 0.22      | 0          | 0.24      | 0          | 0.23      | 0          | 0.21      | 0          | 0.23      | 0          |
| 0.17      | 0          | 0.18      | 0          | 0.24      | 0          | 0.27      | 0          | 0.20      | 0          | 0.50      | 0          |
| 0.17      | 0          | 0.19      | 0          | 0.24      | 0          | 0.23      | 0          | 0.26      | 0          | 0.24      | 0          |
| 0.18      | 0          | 0.20      | 0          | 0.23      | 0          | 0.29      | 0          | 3.88      | 0          | 0.43      | 0          |
| 0.18      | 0          | 0.18      | 0          | 0.22      | 0          | 0.41      | 0          | 0.27      | 0          | 0.30      | 0          |
| 0.16      | 0          | 0.21      | 0          | 0.24      | 0          | 0.24      | 0          | 0.20      | 0          | 2.54      | 0          |
| 0.14      | 0          | 0.19      | 0          | 0.24      | 0          | 0.37      | 0          | 0.20      | 0          | 0.56      | 0          |
| 0.11      | 0          | 0.19      | 0          | 0.26      | 0          | 0.29      | 0          | 0.20      | 0          | 0.25      | 0          |

| time<br>A | leuko<br>A | time<br>A | leuko<br>A | time<br>B | leuko<br>B | time<br>C | leuko<br>C | time<br>D | leuko<br>D | time<br>E | leuko<br>E |
|-----------|------------|-----------|------------|-----------|------------|-----------|------------|-----------|------------|-----------|------------|
| 0.19      | 0          | 0.21      | 0          | 0.24      | 0          | 0.30      | 0          | 0.20      | 0          | 0.32      | 0          |
| 0.19      | 0          | 0.19      | 0          | 0.23      | 0          | 0.43      | 0          | 0.16      | 0          | 0.30      | 0          |
| 0.06      | 0          | 0.20      | 0          | 0.23      | 0          | 0.37      | 0          | 0.20      | 0          | 0.41      | 0          |
| 0.25      | 0          | 0.20      | 0          | 0.23      | 0          | 0.30      | 0          | 0.18      | 0          | 0.23      | 0          |
| 0.19      | 0          | 0.22      | 0          | 0.23      | 0          | 0.43      | 0          | 0.18      | 0          | 0.60      | 0          |
| 0.16      | 0          | 0.19      | 0          | 0.22      | 0          | 3.58      | 0          | 0.19      | 0          | 2.15      | 0          |
| 0.19      | 0          | 0.21      | 0          | 0.24      | 0          | 1.09      | 0          | 0.21      | 0          | 0.28      | 0          |
| 0.27      | 0          | 0.20      | 0          | 0.23      | 0          | 0.21      | 0          | 0.18      | 0          | 0.21      | 0          |
| 0.21      | 0          | 0.21      | 0          | 0.21      | 0          | 0.64      | 0          | 0.20      | 0          | 0.44      | 0          |
| 0.18      | 0          | 0.18      | 0          | 0.28      | 0          | 0.47      | 0          | 0.20      | 0          | 0.25      | 0          |
| 0.18      | 0          | 0.19      | 0          | 0.25      | 0          | 0.31      | 0          | 0.19      | 0          | 0.21      | 0          |
| 0.25      | 0          | 0.18      | 0          | 0.23      | 0          | 0.28      | 0          | 0.19      | 0          | 0.22      | 0          |
| 0.19      | 0          | 0.18      | 0          | 0.23      | 0          | 0.50      | 0          | 0.19      | 0          | 0.50      | 0          |
| 0.19      | 0          | 0.20      | 0          | 0.25      | 0          | 0.27      | 0          | 0.19      | 0          | 2.15      | 0          |
| 0.18      | 0          | 0.19      | 0          | 0.25      | 0          | 0.28      | 0          | 0.19      | 0          | 0.48      | 0          |
| 0.20      | 0          | 0.19      | 0          | 0.24      | 0          | 0.33      | 0          | 0.18      | 0          | 0.28      | 0          |
| 0.17      | 0          | 0.20      | 0          | 0.21      | 0          | 0.33      | 0          | 0.20      | 0          | 0.26      | 0          |
| 0.18      | 0          | 0.20      | 0          | 0.24      | 0          | 0.26      | 0          | 0.20      | 0          | 0.23      | 0          |
| 0.19      | 0          | 0.20      | 0          | 0.24      | 0          | 0.34      | 0          | 0.19      | 0          | 0.54      | 0          |
| 0.18      | 0          | 0.18      | 0          | 0.26      | 0          | 0.25      | 0          | 0.20      | 0          | 0.24      | 0          |
| 0.19      | 0          | 0.20      | 0          | 0.24      | 0          | 0.47      | 0          | 0.20      | 0          | 0.23      | 0          |
| 0.17      | 0          | 0.18      | 0          | 0.23      | 0          | 0.29      | 0          | 0.19      | 0          | 0.22      | 0          |
| 0.18      | 0          | 0.20      | 0          | 0.23      | 0          | 0.43      | 0          | 0.19      | 0          | 0.62      | 0          |
| 0.19      | 0          | 0.20      | 0          | 0.23      | 0          | 0.61      | 0          | 0.19      | 0          | 0.26      | 0          |
| 0.20      | 0          | 0.20      | 0          | 0.22      | 0          | 0.39      | 0          | 0.19      | 0          | 0.24      | 0          |
| 0.20      | 0          | 0.19      | 0          | 0.23      | 0          | 0.27      | 0          | 0.17      | 0          | 0.25      | 0          |
| 0.20      | 0          | 0.20      | 0          | 0.25      | 0          | 0.24      | 0          | 0.20      | 0          | 0.27      | 0          |
| 0.19      | 0          | 0.20      | 0          | 0.23      | 0          | 0.23      | 0          | 0.19      | 0          | 0.52      | 0          |
| 0.19      | 0          | 0.18      | 0          | 0.23      | 0          | 0.23      | 0          | 0.19      | 0          | 0.22      | 0          |
| 0.19      | 0          | 0.22      | 0          | 0.23      | 0          | 0.26      | 0          | 0.19      | 0          | 0.27      | 0          |
| 0.18      | 0          | 0.21      | 0          | 0.23      | 0          | 0.27      | 0          | 0.19      | 0          | 1.61      | 0          |
| 0.17      | 0          | 0.22      | 0          | 0.23      | 0          | 0.21      | 0          | 0.19      | 0          | 0.27      | 0          |
| 0.18      | 0          | 0.21      | 0          | 0.22      | 0          | 0.22      | 0          | 0.20      | 0          | 0.54      | 0          |
| 0.20      | 0          | 0.20      | 0          | 0.23      | 0          | 0.36      | 0          | 0.20      | 0          | 1.20      | 0          |
| 0.18      | 0          | 0.19      | 0          | 0.24      | 0          | 0.26      | 0          | 0.19      | 0          | 0.29      | 0          |
| 0.20      | 0          | 0.18      | 0          | 0.24      | 0          | 0.22      | 0          | 0.18      | 0          | 0.25      | 0          |
| 0.16      | 0          | 0.19      | 0          | 0.25      | 0          | 0.89      | 0          | 0.18      | 0          | 0.25      | 0          |
| 0.21      | 0          | 0.19      | 0          | 0.22      | 0          | 0.96      | 0          | 0.19      | 0          | 0.20      | 0          |
| 0.18      | 0          | 0.21      | 0          | 0.25      | 0          | 0.22      | 0          | 0.19      | 0          | 0.25      | 0          |
| 0.21      | 0          | 0.19      | 0          | 0.23      | 0          | 0.25      | 0          | 0.18      | 0          | 0.22      | 0          |
| 0.22      | 0          | 0.18      | 0          | 0.22      | 0          | 0.28      | 0          | 0.20      | 0          | 0.24      | 0          |
| 0.19      | 0          | 0.20      | 0          | 0.23      | 0          | 0.30      | 0          | 0.19      | 0          | 0.26      | 0          |
| 0.19      | 0          | 0.22      | 0          | 0.24      | 0          | 0.22      | 0          | 0.19      | 0          | 0.27      | 0          |
| 0.20      | 0          | 0.21      | 0          | 0.23      | 0          | 0.23      | 0          | 0.20      | 0          | 0.24      | 0          |
| 0.20      | 0          | 0.21      | 0          | 0.23      | 0          | 0.43      | 0          | 0.20      | 0          | 0.66      | 0          |
| 0.16      | 0          | 0.21      | 0          | 0.26      | 0          | 0.25      | 0          | 0.17      | 0          | 0.23      | 0          |
| 0.18      | 0          | 0.24      | 0          | 0.21      | 0          | 0.24      | 0          | 0.18      | 0          | 0.29      | 0          |
| 0.20      | 0          | 0.20      | 0          | 0.24      | 0          | 0.23      | 0          | 0.18      | 0          | 0.32      | 0          |
| 0.21      | 0          | 0.22      | 0          | 0.22      | 0          | 0.22      | 0          | 0.16      | 0          | 0.67      | 0          |
| 0.22      | 0          | 0.20      | 0          | 0.23      | 0          | 0.40      | 0          | 0.15      | 0          | 0.27      | 0          |
| 0.19      | 0          | 0.19      | 0          | 0.24      | 0          | 0.25      | 0          | 0.18      | 0          | 1.29      | 0          |

| time<br>A | leuko<br>A | time<br>A | leuko<br>A | time<br>B | leuko<br>B | time<br>C | leuko<br>C | time<br>D | leuko<br>D | time<br>E | leuko<br>E |
|-----------|------------|-----------|------------|-----------|------------|-----------|------------|-----------|------------|-----------|------------|
| 0.19      | 0          | 0.22      | 0          | 0.23      | 0          | 0.30      | 0          | 0.16      | 0          | 0.51      | 0          |
| 0.19      | 0          | 0.21      | 0          | 0.24      | 0          | 0.30      | 0          | 0.18      | 0          | 0.27      | 0          |
| 1.66      | 0          | 0.21      | 0          | 0.24      | 0          | 0.29      | 0          | 0.06      | 0          | 0.27      | 0          |
| 0.26      | 0          | 0.20      | 0          | 0.23      | 0          | 0.24      | 0          | 0.11      | 0          | 0.27      | 0          |
| 0.18      | 0          | 2.34      | 0          | 0.25      | 0          | 0.25      | 0          | 0.19      | 0          | 0.28      | 0          |
| 0.19      | 0          | 0.23      | 0          | 0.24      | 0          | 0.23      | 0          | 0.05      | 0          | 0.27      | 0          |
| 0.16      | 0          | 0.20      | 0          | 0.23      | 0          | 0.28      | 0          | 0.10      | 0          | 0.63      | 0          |
| 0.21      | 0          | 0.21      | 0          | 0.25      | 0          | 0.36      | 0          | 0.06      | 0          | 0.25      | 0          |
| 0.20      | 0          | 0.21      | 0          | 0.23      | 0          | 0.22      | 0          | 0.11      | 0          | 0.51      | 0          |
| 0.21      | 0          | 0.21      | 0          | 0.24      | 0          | 0.24      | 0          | 0.18      | 0          | 0.25      | 0          |
| 0.16      | 0          | 0.20      | 0          | 0.23      | 0          | 0.36      | 0          | 0.20      | 0          | 2.53      | 0          |
| 0.18      | 0          | 0.23      | 0          | 0.24      | 0          | 0.36      | 0          | 0.19      | 0          | 0.24      | 0          |
| 0.21      | 0          | 0.31      | 0          | 0.24      | 0          | 0.23      | 0          | 0.20      | 0          | 0.44      | 0          |
| 0.19      | 0          | 0.30      | 0          | 0.23      | 0          | 0.31      | 0          | 0.20      | 0          | 0.28      | 0          |
| 0.19      | 0          | 0.24      | 0          | 0.23      | 0          | 0.21      | 0          | 0.18      | 0          | 0.23      | 0          |
| 0.20      | 0          | 0.42      | 0          | 0.23      | 0          | 0.26      | 0          | 0.20      | 0          | 0.24      | 0          |
| 0.20      | 0          | 0.20      | 0          | 0.22      | 0          | 0.21      | 0          | 0.22      | 0          | 0.24      | 0          |
| 0.22      | 0          | 0.18      | 0          | 0.23      | 0          | 0.21      | 0          | 0.20      | 0          | 0.76      | 0          |
| 0.17      | 0          | 0.20      | 0          | 0.23      | 0          | 0.22      | 0          | 0.18      | 0          | 0.29      | 0          |
| 0.20      | 0          | 0.19      | 0          | 0.21      | 0          | 0.31      | 0          | 0.20      | 0          | 0.45      | 0          |
| 0.19      | 0          | 0.21      | 0          | 0.22      | 0          | 0.24      | 0          | 0.19      | 0          | 0.25      | 0          |
| 0.19      | 0          | 0.19      | 0          | 0.23      | 0          | 0.25      | 0          | 0.19      | 0          | 0.26      | 0          |
| 0.20      | 0          | 0.24      | 0          | 0.24      | 0          | 0.24      | 0          | 0.19      | 0          | 0.25      | 0          |
| 0.20      | 0          | 0.19      | 0          | 0.23      | 0          | 0.31      | 0          | 0.19      | 0          | 0.22      | 0          |
| 0.27      | 0          | 0.13      | 0          | 0.23      | 0          | 0.25      | 0          | 0.19      | 0          | 0.36      | 0          |
| 0.22      | 0          | 0.30      | 0          | 0.23      | 0          | 0.27      | 0          | 0.17      | 0          | 0.30      | 0          |
| 0.22      | 0          | 0.24      | 0          | 0.23      | 0          | 0.33      | 0          | 0.18      | 0          | 0.26      | 0          |
| 0.19      | 0          | 0.20      | 0          | 0.24      | 0          | 0.23      | 0          | 0.19      | 0          | 0.24      | 0          |
| 0.21      | 0          | 0.31      | 0          | 0.23      | 0          | 0.28      | 0          | 0.18      | 0          | 0.87      | 0          |
| 0.25      | 0          | 0.28      | 0          | 0.23      | 0          | 0.29      | 0          | 0.21      | 0          | 0.26      | 0          |
| 0.21      | 0          | 0.19      | 0          | 0.25      | 0          | 0.36      | 0          | 0.18      | 0          | 0.24      | 0          |
| 0.19      | 0          | 0.24      | 0          | 0.23      | 0          | 0.29      | 0          | 0.20      | 0          | 0.26      | 0          |
| 0.22      | 0          | 0.22      | 0          | 0.24      | 0          | 0.43      | 0          | 0.19      | 0          | 1.19      | 0          |
| 0.20      | 0          | 0.21      | 0          | 0.23      | 0          | 0.58      | 0          | 0.20      | 0          | 0.28      | 0          |
| 0.19      | 0          | 0.20      | 0          | 0.24      | 0          | 0.30      | 0          | 0.20      | 0          | 0.22      | 0          |
| 0.21      | 0          | 0.21      | 0          | 0.25      | 0          | 0.32      | 0          | 0.21      | 0          | 0.24      | 0          |
| 0.20      | 0          | 0.21      | 0          | 0.23      | 0          | 0.35      | 0          | 0.22      | 0          | 0.81      | 0          |
| 0.22      | 0          | 0.17      | 0          | 0.22      | 0          | 0.30      | 0          | 0.17      | 0          | 0.26      | 0          |
| 0.19      | 0          | 0.20      | 0          | 0.24      | 0          | 0.30      | 0          | 0.21      | 0          | 0.25      | 0          |
| 0.19      | 0          | 0.21      | 0          | 0.23      | 0          | 0.28      | 0          | 0.19      | 0          | 0.26      | 0          |
| 0.20      | 0          | 0.23      | 0          | 0.22      | 0          | 0.30      | 0          | 0.19      | 0          | 0.24      | 0          |
| 0.22      | 0          | 0.20      | 0          | 0.25      | 0          | 0.27      | 0          | 0.19      | 0          | 0.24      | 0          |
| 0.19      | 0          | 0.37      | 0          | 0.23      | 0          | 0.31      | 0          | 0.22      | 0          | 5.02      | 0          |
| 0.19      | 0          | 0.24      | 0          | 0.23      | 0          | 0.30      | 0          | 0.19      | 0          | 0.24      | 0          |
| 0.22      | 0          | 0.20      | 0          | 0.23      | 0          | 0.26      | 0          | 0.19      | 0          | 0.23      | 0          |
| 0.21      | 0          | 0.19      | 0          | 0.24      | 0          | 0.31      | 0          | 0.22      | 0          | 0.58      | 0          |
| 0.22      | 0          | 0.22      | 0          | 0.24      | 0          | 0.28      | 0          | 0.21      | 0          | 0.25      | 0          |
| 0.19      | 0          | 0.21      | 0          | 0.23      | 0          | 0.25      | 0          | 0.21      | 0          | 0.68      | 0          |
| 0.21      | 0          | 0.20      | 0          | 0.23      | 0          | 0.37      | 0          | 0.21      | 0          | 0.40      | 0          |
| 0.20      | 0          | 0.21      | 0          | 0.24      | 0          | 0.23      | 0          | 0.18      | 0          | 0.87      | 0          |
| 0.20      | 0          | 0.20      | 0          | 0.23      | 0          | 0.21      | 0          | 0.20      | 0          | 0.24      | 0          |

| time<br>A | leuko<br>A | time<br>A | leuko<br>A | time<br>B | leuko<br>B | time<br>C | leuko<br>C | time<br>D | leuko<br>D | time<br>E | leuko<br>E |
|-----------|------------|-----------|------------|-----------|------------|-----------|------------|-----------|------------|-----------|------------|
| 0.20      | 0          | 0.22      | 0          | 0.24      | 0          | 0.23      | 0          | 0.20      | 0          | 0.23      | 0          |
| 0.19      | 0          | 0.20      | 0          | 0.25      | 0          | 0.49      | 0          | 0.21      | 0          | 0.27      | 0          |
| 0.20      | 0          | 0.21      | 0          | 0.23      | 0          | 0.24      | 0          | 0.19      | 0          | 0.56      | 0          |
| 0.15      | 0          | 0.22      | 0          | 0.24      | 0          | 0.23      | 0          | 0.21      | 0          | 0.22      | 0          |
| 0.19      | 0          | 0.22      | 0          | 0.24      | 0          | 0.26      | 0          | 0.19      | 0          | 0.26      | 0          |
| 0.22      | 0          | 0.21      | 0          | 0.24      | 0          | 0.32      | 0          | 0.19      | 0          | 1.20      | 0          |
| 0.21      | 0          | 0.21      | 0          | 0.23      | 0          | 0.32      | 0          | 0.19      | 0          | 0.22      | 0          |
| 0.21      | 0          | 0.22      | 0          | 0.24      | 0          | 0.35      | 0          | 0.16      | 0          | 0.20      | 0          |
| 0.22      | 0          | 0.23      | 0          | 0.23      | 0          | 0.33      | 0          | 0.21      | 0          | 0.25      | 0          |
| 0.22      | 0          | 0.21      | 0          | 0.24      | 0          | 0.42      | 0          | 0.19      | 0          | 0.25      | 0          |
| 0.20      | 0          | 0.21      | 0          | 0.24      | 0          | 6.96      | 0          | 0.16      | 0          | 0.21      | 0          |
| 0.21      | 0          | 0.21      | 0          | 0.24      | 0          | 0.30      | 0          | 0.19      | 0          | 0.27      | 0          |
| 0.19      | 0          | 0.25      | 0          | 0.23      | 0          | 0.24      | 0          | 0.20      | 0          | 1.06      | 0          |
| 0.23      | 0          | 0.24      | 0          | 0.23      | 0          | 0.22      | 0          | 0.21      | 0          | 0.22      | 0          |
| 0.40      | 0          | 0.25      | 0          | 0.21      | 0          | 0.44      | 0          | 0.17      | 0          | 0.25      | 0          |
| 0.22      | 0          | 0.30      | 0          | 0.23      | 0          | 0.25      | 0          | 0.22      | 0          | 0.26      | 0          |
| 0.24      | 0          | 0.23      | 0          | 0.22      | 0          | 1.21      | 0          | 0.21      | 0          | 1.20      | 0          |
| 0.35      | 0          | 0.22      | 0          | 0.24      | 0          | 0.25      | 0          | 0.19      | 0          | 0.19      | 0          |
| 0.23      | 0          | 0.23      | 0          | 0.23      | 0          | 0.28      | 0          | 0.21      | 0          | 0.23      | 0          |
| 0.23      | 0          | 0.21      | 0          | 0.24      | 0          | 0.31      | 0          | 0.21      | 0          | 0.23      | 0          |
| 0.22      | 0          | 0.22      | 0          | 0.25      | 0          | 0.27      | 0          | 0.25      | 0          | 0.46      | 0          |
| 0.21      | 0          | 0.21      | 0          | 0.24      | 0          | 0.25      | 0          | 0.20      | 0          | 0.25      | 0          |
| 0.21      | 0          | 0.23      | 0          | 0.24      | 0          | 0.63      | 0          | 0.22      | 0          | 1.57      | 0          |
| 0.20      | 0          | 0.25      | 0          | 0.24      | 0          | 0.24      | 0          | 0.23      | 0          | 0.69      | 0          |
| 0.19      | 0          | 0.20      | 0          | 0.25      | 0          | 0.22      | 0          | 0.23      | 0          | 0.26      | 0          |
| 0.87      | 0          | 0.27      | 0          | 0.23      | 0          | 0.35      | 0          | 0.21      | 0          | 0.25      | 0          |
| 0.29      | 0          | 0.24      | 0          | 0.23      | 0          | 0.26      | 0          | 0.20      | 0          | 0.25      | 0          |
| 0.36      | 0          | 0.26      | 0          | 0.22      | 0          | 0.23      | 0          | 0.20      | 0          | 0.45      | 0          |
| 0.25      | 0          | 0.36      | 0          | 0.23      | 0          | 0.29      | 0          | 0.21      | 0          | 0.26      | 0          |
| 0.21      | 0          | 0.24      | 0          | 0.23      | 0          | 0.25      | 0          | 0.21      | 0          | 0.25      | 0          |
| 0.22      | 0          | 0.20      | 0          | 0.24      | 0          | 0.91      | 0          | 0.22      | 0          | 0.23      | 0          |
| 0.19      | 0          | 0.21      | 0          | 0.23      | 0          | 0.24      | 0          | 0.22      | 0          | 0.22      | 0          |
| 1.33      | 0          | 0.22      | 0          | 0.21      | 0          | 0.21      | 0          | 0.22      | 0          | 0.53      | 0          |
| 0.18      | 0          | 15.48     | 1          | 0.24      | 0          | 0.22      | 0          | 0.19      | 0          | 0.23      | 0          |
| 0.30      | 0          | 0.25      | 1          | 0.24      | 0          | 0.22      | 0          | 0.20      | 0          | 0.31      | 0          |
| 0.21      | 0          | 0.24      | 1          | 0.23      | 0          | 0.23      | 0          | 0.18      | 0          | 0.33      | 0          |
| 0.23      | 0          | 0.20      | 1          | 0.23      | 0          | 0.93      | 0          | 0.22      | 0          | 0.43      | 0          |
| 0.18      | 0          | 0.24      | 1          | 0.24      | 0          | 0.26      | 0          | 0.20      | 0          | 0.28      | 0          |
| 0.19      | 0          | 2.83      | 0          | 0.23      | 0          | 0.53      | 0          | 0.20      | 0          | 0.30      | 0          |
| 0.21      | 0          | 0.25      | 0          | 0.23      | 0          | 0.22      | 0          | 0.21      | 0          | 0.29      | 0          |
| 0.22      | 0          | 0.20      | 0          | 0.25      | 0          | 0.23      | 0          | 0.19      | 0          | 0.23      | 0          |
| 0.35      | 0          | 0.17      | 0          | 0.25      | 0          | 0.57      | 0          | 0.20      | 0          | 0.31      | 0          |
| 0.23      | 0          | 0.16      | 0          | 0.22      | 0          | 0.25      | 0          | 0.19      | 0          | 0.23      | 0          |
| 0.20      | 0          | 0.19      | 0          | 0.24      | 0          | 0.24      | 0          | 0.20      | 0          | 0.23      | 0          |
| 0.21      | 0          | 0.18      | 0          | 0.24      | 0          | 0.95      | 0          | 0.18      | 0          | 0.23      | 0          |
| 0.20      | 0          | 0.17      | 0          | 0.22      | 0          | 0.21      | 0          | 0.17      | 0          | 1.15      | 0          |
| 0.21      | 0          | 0.18      | 0          | 0.22      | 0          | 1.47      | 0          | 0.37      | 0          | 0.20      | 0          |
| 0.21      | 0          | 0.25      | 0          | 0.22      | 0          | 0.26      | 0          | 0.02      | 0          | 0.25      | 0          |
| 0.21      | 0          | 0.22      | 0          | 0.24      | 0          | 0.89      | 0          | 0.18      | 0          | 0.24      | 0          |
| 0.22      | 0          | 0.15      | 0          | 0.23      | 0          | 0.25      | 0          | 0.20      | 0          | 0.27      | 0          |
| 0.21      | 0          | 0.15      | 0          | 0.24      | 0          | 0.22      | 0          | 0.20      | 0          | 1.30      | 0          |



| time<br>A | leuko<br>A | time<br>A | leuko<br>A | time<br>B | leuko<br>B | time<br>C | leuko<br>C | time<br>D | leuko<br>D | time<br>E | leuko<br>E |
|-----------|------------|-----------|------------|-----------|------------|-----------|------------|-----------|------------|-----------|------------|
| 0.23      | 0          | 0.18      | 0          | 0.23      | 0          | 0.28      | 0          | 0.20      | 0          | 0.19      | 0          |
| 0.20      | 0          | 0.17      | 0          | 0.24      | 0          | 0.28      | 0          | 0.20      | 0          | 0.28      | 0          |
| 0.22      | 0          | 0.18      | 0          | 0.22      | 0          | 0.26      | 0          | 0.20      | 0          | 0.24      | 0          |
| 0.21      | 0          | 0.15      | 0          | 0.24      | 0          | 0.30      | 0          | 0.18      | 0          | 0.24      | 0          |
| 0.20      | 0          | 0.18      | 0          | 0.25      | 0          | 0.31      | 0          | 0.20      | 0          | 0.52      | 0          |
| 0.20      | 0          | 0.16      | 0          | 0.22      | 0          | 0.93      | 0          | 0.33      | 0          | 0.24      | 0          |
| 0.22      | 0          | 0.16      | 0          | 0.24      | 0          | 0.75      | 0          | 0.23      | 0          | 0.36      | 0          |
| 0.16      | 0          | 0.12      | 0          | 0.25      | 0          | 0.24      | 0          | 0.18      | 0          | 1.58      | 0          |
| 0.20      | 0          | 0.22      | 0          | 0.23      | 0          | 0.26      | 0          | 0.19      | 0          | 0.24      | 0          |
| 0.21      | 0          | 0.29      | 0          | 0.26      | 0          | 0.74      | 1          | 0.16      | 0          | 0.28      | 0          |
| 0.20      | 0          | 0.19      | 0          | 0.21      | 0          | 0.24      | 1          | 0.19      | 0          | 0.23      | 0          |
| 0.22      | 0          | 0.16      | 0          | 0.24      | 0          | 0.38      | 1          | 0.19      | 0          | 0.27      | 0          |
| 0.21      | 0          | 0.15      | 0          | 0.24      | 0          | 0.26      | 1          | 0.19      | 0          | 0.28      | 0          |
| 0.22      | 0          | 0.20      | 0          | 0.23      | 0          | 0.91      | 1          | 0.19      | 0          | 0.26      | 0          |
| 0.21      | 0          | 0.18      | 0          | 0.25      | 0          | 0.20      | 1          | 0.19      | 0          | 0.22      | 0          |
| 0.62      | 0          | 0.20      | 0          | 0.61      | 0          | 0.45      | 1          | 0.18      | 0          | 0.33      | 0          |
| 0.28      | 0          | 0.18      | 0          | 0.25      | 0          | 15.82     | 1          | 0.17      | 0          | 0.32      | 0          |
| 0.25      | 0          | 0.20      | 0          | 0.24      | 0          | 0.38      | 1          | 0.21      | 0          | 0.21      | 0          |
| 0.25      | 0          | 0.19      | 0          | 0.24      | 0          | 0.36      | 1          | 0.35      | 0          | 0.37      | 0          |
| 0.23      | 0          | 0.20      | 0          | 0.22      | 0          | 3.54      | 0          | 0.23      | 0          | 0.24      | 0          |
| 0.22      | 0          | 0.22      | 0          | 0.23      | 0          | 0.28      | 0          | 0.23      | 0          | 0.84      | 0          |
| 0.20      | 0          | 0.19      | 0          | 0.23      | 0          | 0.25      | 0          | 0.23      | 0          | 0.48      | 0          |
| 0.24      | 0          | 0.21      | 0          | 0.23      | 0          | 0.24      | 0          | 0.18      | 0          | 0.24      | 0          |
| 0.24      | 0          | 0.19      | 0          | 0.24      | 0          | 0.20      | 0          | 0.19      | 0          | 0.25      | 0          |
| 0.34      | 0          | 0.20      | 0          | 0.24      | 0          | 0.22      | 0          | 0.18      | 0          | 1.04      | 0          |
| 0.21      | 0          | 0.22      | 0          | 0.21      | 0          | 0.26      | 0          | 0.19      | 0          | 0.25      | 0          |
| 0.20      | 0          | 0.19      | 0          | 0.24      | 0          | 0.23      | 0          | 0.20      | 0          | 0.22      | 0          |
| 0.21      | 0          | 0.18      | 0          | 0.22      | 0          | 0.33      | 0          | 0.17      | 0          | 0.27      | 0          |
| 0.20      | 0          | 0.22      | 0          | 0.25      | 0          | 0.25      | 0          | 0.20      | 0          | 0.27      | 0          |
| 0.22      | 0          | 0.32      | 0          | 0.23      | 0          | 0.75      | 0          | 0.20      | 0          | 0.36      | 0          |
| 0.20      | 0          | 0.23      | 0          | 0.23      | 0          | 0.26      | 0          | 0.19      | 0          | 0.25      | 0          |
| 0.20      | 0          | 0.15      | 0          | 0.23      | 0          | 0.26      | 0          | 0.21      | 0          | 0.29      | 0          |
| 0.15      | 0          | 0.18      | 0          | 0.23      | 0          | 0.64      | 0          | 0.20      | 0          | 0.64      | 0          |
| 0.28      | 0          | 0.22      | 0          | 0.26      | 0          | 0.20      | 0          | 0.18      | 0          | 0.26      | 0          |
| 0.22      | 0          | 0.19      | 0          | 0.23      | 0          | 0.24      | 0          | 0.18      | 0          | 0.23      | 0          |
| 0.20      | 0          | 0.20      | 0          | 0.25      | 0          | 0.25      | 0          | 0.22      | 0          | 0.24      | 0          |
| 0.15      | 0          | 0.18      | 0          | 0.51      | 0          | 1.20      | 0          | 0.22      | 0          | 0.23      | 0          |
| 0.28      | 0          | 0.20      | 0          | 0.35      | 0          | 0.27      | 0          | 0.15      | 0          | 0.25      | 0          |
| 0.23      | 0          | 0.20      | 0          | 0.30      | 0          | 0.31      | 0          | 0.19      | 0          | 0.28      | 0          |
| 0.19      | 0          | 0.18      | 0          | 0.25      | 0          | 0.19      | 0          | 0.20      | 0          | 0.25      | 0          |
| 0.24      | 0          | 0.19      | 0          | 0.26      | 0          | 0.42      | 0          | 0.20      | 0          | 0.23      | 0          |
| 0.24      | 0          | 0.21      | 0          | 0.26      | 0          | 0.40      | 0          | 0.18      | 0          | 0.23      | 0          |
| 0.25      | 0          | 0.22      | 0          | 0.24      | 0          | 0.23      | 0          | 0.20      | 0          | 0.23      | 0          |
| 0.24      | 0          | 0.22      | 0          | 0.24      | 0          | 0.36      | 0          | 0.20      | 0          | 0.26      | 0          |
| 0.23      | 0          | 0.20      | 0          | 0.23      | 0          | 0.21      | 0          | 0.21      | 0          | 0.23      | 0          |
| 0.22      | 0          | 0.22      | 0          | 0.24      | 0          | 0.30      | 0          | 0.19      | 0          | 0.22      | 0          |
| 0.19      | 0          | 0.21      | 0          | 0.25      | 0          | 0.35      | 0          | 0.21      | 0          | 0.23      | 0          |
| 0.26      | 0          | 0.21      | 0          | 0.25      | 0          | 2.39      | 0          | 0.20      | 0          | 0.26      | 0          |
| 0.18      | 0          | 0.20      | 0          | 0.24      | 0          | 0.28      | 0          | 0.20      | 0          | 0.25      | 0          |
| 0.22      | 0          | 0.22      | 0          | 0.25      | 0          | 0.29      | 0          | 0.20      | 0          | 0.22      | 0          |
| 0.22      | 0          | 0.23      | 0          | 0.24      | 0          | 0.44      | 0          | 0.19      | 0          | 0.21      | 0          |

| time<br>A | leuko<br>A | time<br>A | leuko<br>A | time<br>B | leuko<br>B | time<br>C | leuko<br>C | time<br>D | leuko<br>D | time<br>E | leuko<br>E |
|-----------|------------|-----------|------------|-----------|------------|-----------|------------|-----------|------------|-----------|------------|
| 0.25      | 0          | 0.21      | 0          | 0.24      | 0          | 0.40      | 0          | 0.21      | 0          | 0.22      | 0          |
| 0.23      | 0          | 0.25      | 0          | 0.23      | 0          | 0.21      | 0          | 0.18      | 0          | 0.22      | 0          |
| 0.52      | 0          | 0.25      | 0          | 0.24      | 0          | 0.34      | 0          | 0.21      | 0          | 0.23      | 0          |
| 0.22      | 0          | 0.20      | 0          | 0.25      | 0          | 0.29      | 0          | 0.28      | 0          | 0.23      | 0          |
| 0.22      | 0          | 0.26      | 0          | 0.25      | 0          | 0.22      | 0          | 0.20      | 0          | 0.23      | 0          |
| 0.21      | 0          | 0.27      | 0          | 0.20      | 0          | 0.27      | 0          | 0.29      | 0          | 1.04      | 0          |
| 0.21      | 0          | 0.21      | 0          | 0.24      | 0          | 0.50      | 0          | 0.24      | 0          | 0.17      | 0          |
| 0.21      | 0          | 0.19      | 0          | 0.25      | 0          | 0.31      | 0          | 0.25      | 0          | 0.36      | 0          |
| 0.19      | 0          | 0.21      | 0          | 0.24      | 0          | 0.22      | 0          | 0.21      | 0          | 0.25      | 0          |
| 0.20      | 0          | 0.24      | 0          | 0.26      | 0          | 0.52      | 0          | 0.20      | 0          | 0.24      | 0          |
| 0.10      | 0          | 0.27      | 0          | 0.23      | 0          | 0.22      | 0          | 0.19      | 0          | 0.25      | 0          |
| 0.27      | 0          | 0.25      | 0          | 0.24      | 0          | 0.34      | 0          | 0.21      | 0          | 0.25      | 0          |
| 0.21      | 0          | 0.29      | 0          | 0.24      | 0          | 0.20      | 0          | 0.21      | 0          | 0.32      | 0          |
| 0.21      | 0          | 0.54      | 0          | 0.24      | 0          | 0.27      | 0          | 0.20      | 0          | 0.28      | 0          |
| 0.21      | 0          | 0.29      | 0          | 0.23      | 0          | 0.40      | 0          | 0.20      | 0          | 0.24      | 0          |
| 0.21      | 0          | 0.22      | 0          | 0.25      | 0          | 0.28      | 0          | 0.22      | 0          | 0.26      | 0          |
| 0.23      | 0          | 0.24      | 0          | 0.24      | 0          | 0.23      | 0          | 0.20      | 0          | 0.30      | 0          |
| 0.16      | 0          | 0.22      | 0          | 0.23      | 0          | 0.21      | 0          | 0.20      | 0          | 0.54      | 0          |
| 0.27      | 0          | 0.23      | 0          | 0.24      | 0          | 0.26      | 0          | 0.21      | 0          | 0.24      | 0          |
| 0.23      | 0          | 0.25      | 0          | 0.24      | 0          | 0.22      | 0          | 0.19      | 0          | 2.59      | 0          |
| 0.22      | 0          | 0.18      | 0          | 0.22      | 0          | 0.22      | 0          | 0.21      | 0          | 0.21      | 0          |
| 0.27      | 0          | 0.22      | 0          | 0.23      | 0          | 0.25      | 0          | 0.19      | 0          | 0.21      | 0          |
| 0.25      | 0          | 0.22      | 0          | 0.01      | 0          | 0.27      | 0          | 0.18      | 0          | 0.23      | 0          |
| 0.29      | 0          | 0.21      | 0          | 0.20      | 0          | 0.23      | 0          | 0.21      | 0          | 0.22      | 0          |
| 0.24      | 0          | 0.22      | 0          | 0.22      | 0          | 0.34      | 0          | 0.18      | 0          | 0.22      | 0          |
| 0.22      | 0          | 0.23      | 0          | 0.23      | 0          | 0.28      | 0          | 0.21      | 0          | 0.22      | 0          |
| 0.21      | 0          | 0.23      | 0          | 0.23      | 0          | 0.20      | 0          | 0.19      | 0          | 0.23      | 0          |
| 0.22      | 0          | 0.23      | 0          | 0.23      | 0          | 0.24      | 0          | 0.20      | 0          | 0.25      | 0          |
| 0.21      | 0          | 0.22      | 0          | 0.24      | 0          | 0.49      | 0          | 0.23      | 0          | 0.23      | 0          |
| 0.21      | 0          | 0.21      | 0          | 0.24      | 0          | 0.24      | 0          | 0.29      | 0          | 1.13      | 0          |
| 0.22      | 0          | 0.20      | 0          | 0.24      | 0          | 0.20      | 0          | 0.19      | 0          | 0.25      | 0          |
| 0.20      | 0          | 0.21      | 0          | 0.24      | 0          | 0.24      | 0          | 0.21      | 0          | 0.24      | 0          |
| 0.24      | 0          | 0.21      | 0          | 0.25      | 0          | 0.22      | 0          | 0.18      | 0          | 0.41      | 0          |
| 0.21      | 0          | 0.21      | 0          | 0.24      | 0          | 0.45      | 0          | 0.20      | 0          | 0.25      | 0          |
| 0.18      | 0          | 0.34      | 0          | 0.24      | 0          | 0.26      | 0          | 0.20      | 0          | 0.27      | 0          |
| 0.22      | 0          | 0.28      | 0          | 0.23      | 0          | 0.22      | 0          | 0.21      | 0          | 0.20      | 0          |
| 0.19      | 0          | 0.24      | 0          | 0.24      | 0          | 0.20      | 0          | 0.20      | 0          | 0.23      | 0          |
| 0.23      | 0          | 0.22      | 0          | 0.24      | 0          | 0.29      | 0          | 0.20      | 0          | 0.30      | 0          |
| 0.19      | 0          | 0.20      | 0          | 0.24      | 0          | 0.24      | 0          | 0.20      | 0          | 0.27      | 0          |
| 0.20      | 0          | 0.23      | 0          | 0.27      | 0          | 0.27      | 0          | 0.20      | 0          | 0.25      | 0          |
| 0.61      | 1          | 0.15      | 0          | 0.22      | 0          | 0.26      | 0          | 0.19      | 0          | 0.22      | 0          |
| 0.55      | 1          | 0.24      | 0          | 0.24      | 0          | 0.41      | 0          | 0.21      | 0          | 0.23      | 0          |
| 0.49      | 1          | 0.19      | 0          | 0.23      | 0          | 0.19      | 0          | 0.18      | 0          | 0.25      | 0          |
| 0.40      | 1          | 0.22      | 0          | 0.26      | 0          | 0.23      | 0          | 0.21      | 0          | 0.24      | 0          |
| 0.36      | 1          | 0.21      | 0          | 0.24      | 0          | 0.18      | 0          | 0.18      | 0          | 0.23      | 0          |
| NA        | NA         | 0.20      | 0          | 0.23      | 0          | 0.30      | 0          | 0.20      | 0          | 0.22      | 0          |
| NA        | NA         | 0.23      | 0          | 0.23      | 0          | 0.17      | 0          | 0.19      | 0          | 0.22      | 0          |
| NA        | NA         | 0.19      | 0          | 0.25      | 0          | 0.36      | 0          | 0.20      | 0          | 0.20      | 0          |
| NA        | NA         | 0.24      | 0          | 0.25      | 0          | 0.36      | 0          | 0.18      | 0          | 3.18      | 0          |
| NA        | NA         | 0.20      | 0          | 0.26      | 0          | 0.28      | 0          | 0.21      | 0          | 0.23      | 0          |
| NA        | NA         | 0.19      | 0          | 0.23      | 0          | 0.23      | 0          | 0.20      | 0          | 0.22      | 0          |

| time<br>A | leuko<br>A | time<br>A | leuko<br>A | time<br>B | leuko<br>B | time<br>C | leuko<br>C | time<br>D | leuko<br>D | time<br>E | leuko<br>E |
|-----------|------------|-----------|------------|-----------|------------|-----------|------------|-----------|------------|-----------|------------|
| NA        | NA         | 0.21      | 0          | 0.23      | 0          | 0.26      | 0          | 0.21      | 0          | 0.21      | 0          |
| NA        | NA         | 0.22      | 0          | 0.23      | 0          | 0.22      | 0          | 0.16      | 0          | 0.85      | 0          |
| NA        | NA         | 0.20      | 0          | 0.24      | 0          | 0.26      | 0          | 0.17      | 0          | 0.12      | 0          |
| NA        | NA         | 0.19      | 0          | 0.24      | 0          | 0.22      | 0          | 0.19      | 0          | 0.23      | 0          |
| NA        | NA         | 0.23      | 0          | 0.23      | 0          | 0.23      | 0          | 0.18      | 0          | 0.24      | 0          |
| NA        | NA         | 0.22      | 0          | 0.24      | 0          | 0.19      | 0          | 0.20      | 0          | 0.31      | 0          |
| NA        | NA         | 0.22      | 0          | 0.24      | 0          | 0.28      | 0          | 0.18      | 0          | 0.30      | 0          |
| NA        | NA         | 0.20      | 0          | 0.24      | 0          | 0.35      | 0          | 0.21      | 0          | 0.23      | 0          |
| NA        | NA         | 0.24      | 0          | 0.24      | 0          | 0.30      | 0          | 0.21      | 0          | 0.22      | 0          |
| NA        | NA         | 0.24      | 0          | 0.27      | 0          | 0.29      | 0          | 0.17      | 0          | 0.24      | 0          |
| NA        | NA         | 0.24      | 0          | 0.25      | 0          | 0.20      | 0          | 0.21      | 0          | 0.22      | 0          |
| NA        | NA         | 0.21      | 0          | 0.25      | 0          | 0.30      | 0          | 0.19      | 0          | 0.23      | 0          |
| NA        | NA         | 0.25      | 0          | 0.24      | 0          | 0.22      | 0          | 0.19      | 0          | 0.24      | 0          |
| NA        | NA         | 0.25      | 0          | 0.25      | 0          | 0.21      | 0          | 0.18      | 0          | 0.25      | 0          |
| NA        | NA         | 0.26      | 0          | 0.25      | 0          | 0.24      | 0          | 0.21      | 0          | 0.23      | 0          |
| NA        | NA         | 0.20      | 0          | 0.26      | 0          | 0.31      | 0          | 0.20      | 0          | 0.24      | 0          |
| NA        | NA         | 0.23      | 0          | 0.25      | 0          | 0.22      | 0          | 0.20      | 0          | 0.51      | 0          |
| NA        | NA         | 0.21      | 0          | 0.24      | 0          | 0.21      | 0          | 0.19      | 0          | 0.25      | 0          |
| NA        | NA         | 0.21      | 0          | 0.27      | 0          | 0.24      | 0          | 0.18      | 0          | 0.24      | 0          |
| NA        | NA         | 0.21      | 0          | 0.23      | 0          | 0.43      | 0          | 0.19      | 0          | NA        | NA         |
| NA        | NA         | 0.21      | 0          | 0.25      | 0          | 0.28      | 0          | 0.19      | 0          | NA        | NA         |
| NA        | NA         | 0.24      | 0          | 0.25      | 0          | 0.42      | 0          | 0.18      | 0          | NA        | NA         |
| NA        | NA         | 0.22      | 0          | 0.25      | 0          | 0.26      | 0          | 0.21      | 0          | NA        | NA         |
| NA        | NA         | 0.22      | 0          | 0.24      | 0          | 0.22      | 0          | 0.20      | 0          | NA        | NA         |
| NA        | NA         | 0.20      | 0          | 0.24      | 0          | 0.26      | 0          | 0.23      | 0          | NA        | NA         |
| NA        | NA         | 0.22      | 0          | 0.25      | 0          | 0.22      | 0          | 0.17      | 0          | NA        | NA         |
| NA        | NA         | 0.20      | 0          | 0.25      | 0          | 0.23      | 0          | 0.19      | 0          | NA        | NA         |
| NA        | NA         | 0.23      | 0          | 0.24      | 0          | 0.19      | 0          | 0.21      | 0          | NA        | NA         |
| NA        | NA         | 0.28      | 0          | 0.25      | 0          | 0.23      | 0          | 0.19      | 0          | NA        | NA         |
| NA        | NA         | 0.27      | 0          | 0.25      | 0          | 0.21      | 0          | 0.20      | 0          | NA        | NA         |
| NA        | NA         | 0.24      | 0          | 0.24      | 0          | 0.22      | 0          | 0.22      | 0          | NA        | NA         |
| NA        | NA         | 0.21      | 0          | 0.23      | 0          | 0.36      | 0          | 0.22      | 0          | NA        | NA         |
| NA        | NA         | 0.20      | 0          | 0.23      | 0          | 0.30      | 0          | 0.52      | 0          | NA        | NA         |
| NA        | NA         | 0.23      | 0          | NA        | NA         | 0.18      | 0          | 0.21      | 0          | NA        | NA         |
| NA        | NA         | 0.24      | 0          | NA        | NA         | 0.25      | 0          | 0.18      | 0          | NA        | NA         |
| NA        | NA         | 0.29      | 0          | NA        | NA         | 0.19      | 0          | 0.22      | 0          | NA        | NA         |
| NA        | NA         | 0.31      | 0          | NA        | NA         | 0.23      | 0          | 0.21      | 0          | NA        | NA         |
| NA        | NA         | 0.24      | 0          | NA        | NA         | 0.21      | 0          | 0.19      | 0          | NA        | NA         |
| NA        | NA         | 0.25      | 0          | NA        | NA         | 0.35      | 0          | 0.21      | 0          | NA        | NA         |
| NA        | NA         | 0.20      | 0          | NA        | NA         | 0.17      | 0          | 0.22      | 0          | NA        | NA         |
| NA        | NA         | 0.26      | 0          | NA        | NA         | 0.39      | 0          | 0.19      | 0          | NA        | NA         |
| NA        | NA         | 0.38      | 0          | NA        | NA         | 0.29      | 0          | 0.20      | 0          | NA        | NA         |
| NA        | NA         | 0.23      | 0          | NA        | NA         | 0.25      | 0          | 0.22      | 0          | NA        | NA         |
| NA        | NA         | 0.21      | 0          | NA        | NA         | 0.34      | 0          | 0.19      | 0          | NA        | NA         |
| NA        | NA         | 0.25      | 0          | NA        | NA         | 0.21      | 0          | 0.20      | 0          | NA        | NA         |
| NA        | NA         | 0.38      | 0          | NA        | NA         | 0.37      | 0          | 0.21      | 0          | NA        | NA         |
| NA        | NA         | 0.26      | 0          | NA        | NA         | 0.21      | 0          | 0.19      | 0          | NA        | NA         |
| NA        | NA         | 0.30      | 0          | NA        | NA         | 0.54      | 0          | 0.19      | 0          | NA        | NA         |
| NA        | NA         | 0.26      | 0          | NA        | NA         | 0.57      | 0          | 0.20      | 0          | NA        | NA         |
| NA        | NA         | 0.23      | 0          | NA        | NA         | 0.26      | 0          | 0.18      | 0          | NA        | NA         |
| NA        | NA         | 0.36      | 0          | NA        | NA         | 0.37      | 0          | 0.23      | 0          | NA        | NA         |

| time<br>A | leuko<br>A | time<br>A | leuko<br>A | time<br>B | leuko<br>B | time<br>C | leuko<br>C | time<br>D | leuko<br>D | time<br>E | leuko<br>E |
|-----------|------------|-----------|------------|-----------|------------|-----------|------------|-----------|------------|-----------|------------|
| NA        | NA         | 0.22      | 0          | NA        | NA         | 0.50      | 0          | 0.19      | 0          | NA        | NA         |
| NA        | NA         | 0.23      | 0          | NA        | NA         | 0.23      | 0          | 0.18      | 0          | NA        | NA         |
| NA        | NA         | 0.22      | 0          | NA        | NA         | 0.34      | 0          | 0.21      | 0          | NA        | NA         |
| NA        | NA         | 0.33      | 0          | NA        | NA         | 0.24      | 0          | 0.21      | 0          | NA        | NA         |
| NA        | NA         | 0.21      | 0          | NA        | NA         | 0.23      | 0          | 0.19      | 0          | NA        | NA         |
| NA        | NA         | 0.39      | 0          | NA        | NA         | 0.29      | 0          | 0.20      | 0          | NA        | NA         |
| NA        | NA         | 0.29      | 0          | NA        | NA         | 0.33      | 0          | 0.19      | 0          | NA        | NA         |
| NA        | NA         | 0.26      | 0          | NA        | NA         | 0.22      | 0          | 0.22      | 0          | NA        | NA         |
| NA        | NA         | 0.22      | 0          | NA        | NA         | 0.29      | 0          | 0.18      | 0          | NA        | NA         |
| NA        | NA         | 0.24      | 0          | NA        | NA         | 0.27      | 0          | 0.21      | 0          | NA        | NA         |
| NA        | NA         | 0.21      | 0          | NA        | NA         | 0.35      | 0          | 0.20      | 0          | NA        | NA         |
| NA        | NA         | 0.22      | 0          | NA        | NA         | 0.26      | 0          | 0.18      | 0          | NA        | NA         |
| NA        | NA         | 0.20      | 0          | NA        | NA         | 0.30      | 0          | 0.20      | 0          | NA        | NA         |
| NA        | NA         | 0.23      | 0          | NA        | NA         | 0.38      | 0          | 0.20      | 0          | NA        | NA         |
| NA        | NA         | 0.19      | 0          | NA        | NA         | 0.27      | 0          | 0.20      | 0          | NA        | NA         |
| NA        | NA         | 0.22      | 0          | NA        | NA         | 0.24      | 0          | 0.21      | 0          | NA        | NA         |
| NA        | NA         | 0.19      | 0          | NA        | NA         | 0.21      | 0          | 0.20      | 0          | NA        | NA         |
| NA        | NA         | 0.19      | 0          | NA        | NA         | 0.37      | 0          | 0.20      | 0          | NA        | NA         |
| NA        | NA         | 0.30      | 0          | NA        | NA         | 0.21      | 0          | 0.20      | 0          | NA        | NA         |
| NA        | NA         | 0.16      | 0          | NA        | NA         | 0.34      | 0          | 0.23      | 0          | NA        | NA         |
| NA        | NA         | 0.25      | 0          | NA        | NA         | 0.40      | 0          | 0.20      | 0          | NA        | NA         |
| NA        | NA         | 0.28      | 0          | NA        | NA         | 0.29      | 0          | 0.21      | 0          | NA        | NA         |
| NA        | NA         | 0.28      | 0          | NA        | NA         | 0.26      | 0          | 0.22      | 0          | NA        | NA         |
| NA        | NA         | 0.12      | 0          | NA        | NA         | 0.29      | 0          | 0.22      | 0          | NA        | NA         |
| NA        | NA         | 0.28      | 0          | NA        | NA         | 0.28      | 0          | 0.19      | 0          | NA        | NA         |
| NA        | NA         | 0.23      | 0          | NA        | NA         | 0.43      | 0          | 0.19      | 0          | NA        | NA         |
| NA        | NA         | 0.21      | 0          | NA        | NA         | 0.25      | 0          | 0.21      | 0          | NA        | NA         |
| NA        | NA         | 0.22      | 0          | NA        | NA         | 0.38      | 0          | 0.19      | 0          | NA        | NA         |
| NA        | NA         | 0.31      | 0          | NA        | NA         | 0.21      | 0          | 0.21      | 0          | NA        | NA         |
| NA        | NA         | 0.24      | 0          | NA        | NA         | 0.31      | 0          | 0.45      | 0          | NA        | NA         |
| NA        | NA         | 0.25      | 0          | NA        | NA         | 0.21      | 0          | 0.22      | 0          | NA        | NA         |
| NA        | NA         | 0.14      | 0          | NA        | NA         | 0.22      | 0          | 0.28      | 0          | NA        | NA         |
| NA        | NA         | 0.18      | 0          | NA        | NA         | 0.23      | 0          | 2.58      | 1          | NA        | NA         |
| NA        | NA         | 0.19      | 0          | NA        | NA         | 0.25      | 0          | 0.29      | 1          | NA        | NA         |
| NA        | NA         | 0.25      | 0          | NA        | NA         | 0.23      | 0          | 0.29      | 1          | NA        | NA         |
| NA        | NA         | 0.23      | 0          | NA        | NA         | 0.23      | 0          | 1.80      | 1          | NA        | NA         |
| NA        | NA         | 0.24      | 0          | NA        | NA         | 0.25      | 0          | 0.53      | 1          | NA        | NA         |
| NA        | NA         | 0.17      | 0          | NA        | NA         | 0.30      | 0          | 1.69      | 1          | NA        | NA         |
| NA        | NA         | 0.26      | 0          | NA        | NA         | 0.22      | 0          | 0.62      | 1          | NA        | NA         |
| NA        | NA         | 0.21      | 0          | NA        | NA         | 0.25      | 0          | 2.09      | 1          | NA        | NA         |
| NA        | NA         | 0.20      | 0          | NA        | NA         | 0.23      | 0          | 0.96      | 1          | NA        | NA         |
| NA        | NA         | 0.27      | 0          | NA        | NA         | 0.27      | 0          | 0.40      | 1          | NA        | NA         |
| NA        | NA         | 0.24      | 0          | NA        | NA         | 0.22      | 0          | 0.36      | 1          | NA        | NA         |
| NA        | NA         | 0.15      | 0          | NA        | NA         | 0.26      | 0          | 0.54      | 1          | NA        | NA         |
| NA        | NA         | 0.26      | 0          | NA        | NA         | 0.25      | 0          | 0.97      | 0          | NA        | NA         |
| NA        | NA         | 0.26      | 0          | NA        | NA         | 0.23      | 0          | 0.18      | 0          | NA        | NA         |
| NA        | NA         | 0.20      | 0          | NA        | NA         | 0.21      | 0          | 0.20      | 0          | NA        | NA         |
| NA        | NA         | 0.23      | 0          | NA        | NA         | 0.27      | 0          | 0.18      | 0          | NA        | NA         |
| NA        | NA         | 0.22      | 0          | NA        | NA         | 0.28      | 0          | 0.18      | 0          | NA        | NA         |
| NA        | NA         | 0.23      | 0          | NA        | NA         | 0.19      | 0          | 0.20      | 0          | NA        | NA         |
| NA        | NA         | 0.25      | 0          | NA        | NA         | 0.21      | 0          | 0.19      | 0          | NA        | NA         |

| time<br>A | leuko<br>A | time<br>A | leuko<br>A | time<br>B | leuko<br>B | time<br>C | leuko<br>C | time<br>D | leuko<br>D | time<br>E | leuko<br>E |
|-----------|------------|-----------|------------|-----------|------------|-----------|------------|-----------|------------|-----------|------------|
| NA        | NA         | 0.28      | 0          | NA        | NA         | 0.26      | 0          | 0.17      | 0          | NA        | NA         |
| NA        | NA         | 0.23      | 0          | NA        | NA         | 0.77      | 0          | 0.18      | 0          | NA        | NA         |
| NA        | NA         | 0.22      | 0          | NA        | NA         | 0.22      | 0          | 0.19      | 0          | NA        | NA         |
| NA        | NA         | 0.24      | 0          | NA        | NA         | 0.23      | 0          | 0.18      | 0          | NA        | NA         |
| NA        | NA         | 0.27      | 0          | NA        | NA         | 0.22      | 0          | 0.19      | 0          | NA        | NA         |
| NA        | NA         | 0.22      | 0          | NA        | NA         | 0.27      | 0          | 0.16      | 0          | NA        | NA         |
| NA        | NA         | 0.24      | 0          | NA        | NA         | 0.28      | 0          | 0.19      | 0          | NA        | NA         |
| NA        | NA         | 0.26      | 0          | NA        | NA         | 0.38      | 0          | 0.17      | 0          | NA        | NA         |
| NA        | NA         | 0.22      | 0          | NA        | NA         | 0.27      | 0          | 0.18      | 0          | NA        | NA         |
| NA        | NA         | 0.28      | 0          | NA        | NA         | 0.21      | 0          | 0.18      | 0          | NA        | NA         |
| NA        | NA         | 0.33      | 0          | NA        | NA         | 0.30      | 0          | 0.15      | 0          | NA        | NA         |
| NA        | NA         | 0.33      | 0          | NA        | NA         | 0.21      | 0          | 0.17      | 0          | NA        | NA         |
| NA        | NA         | 0.34      | 0          | NA        | NA         | 0.22      | 0          | 0.18      | 0          | NA        | NA         |
| NA        | NA         | NA        | NA         | NA        | NA         | 0.29      | 0          | 0.17      | 0          | NA        | NA         |
| NA        | NA         | NA        | NA         | NA        | NA         | 0.25      | 0          | 0.17      | 0          | NA        | NA         |
| NA        | NA         | NA        | NA         | NA        | NA         | 0.30      | 0          | 0.17      | 0          | NA        | NA         |
| NA        | NA         | NA        | NA         | NA        | NA         | 0.27      | 0          | 0.20      | 0          | NA        | NA         |
| NA        | NA         | NA        | NA         | NA        | NA         | 0.24      | 0          | 0.18      | 0          | NA        | NA         |
| NA        | NA         | NA        | NA         | NA        | NA         | 0.21      | 0          | 0.17      | 0          | NA        | NA         |
| NA        | NA         | NA        | NA         | NA        | NA         | 0.24      | 0          | 0.18      | 0          | NA        | NA         |
| NA        | NA         | NA        | NA         | NA        | NA         | 0.25      | 0          | 0.19      | 0          | NA        | NA         |
| NA        | NA         | NA        | NA         | NA        | NA         | 0.23      | 0          | 0.17      | 0          | NA        | NA         |
| NA        | NA         | NA        | NA         | NA        | NA         | 0.27      | 0          | 0.17      | 0          | NA        | NA         |
| NA        | NA         | NA        | NA         | NA        | NA         | 0.23      | 0          | 0.15      | 0          | NA        | NA         |
| NA        | NA         | NA        | NA         | NA        | NA         | 0.38      | 0          | 0.15      | 0          | NA        | NA         |
| NA        | NA         | NA        | NA         | NA        | NA         | 0.25      | 0          | 0.16      | 0          | NA        | NA         |
| NA        | NA         | NA        | NA         | NA        | NA         | 0.22      | 0          | 0.34      | 0          | NA        | NA         |
| NA        | NA         | NA        | NA         | NA        | NA         | 0.23      | 0          | 0.20      | 0          | NA        | NA         |
| NA        | NA         | NA        | NA         | NA        | NA         | 0.24      | 0          | 0.21      | 0          | NA        | NA         |
| NA        | NA         | NA        | NA         | NA        | NA         | 0.31      | 0          | 0.20      | 0          | NA        | NA         |
| NA        | NA         | NA        | NA         | NA        | NA         | 0.35      | 0          | 0.20      | 0          | NA        | NA         |
| NA        | NA         | NA        | NA         | NA        | NA         | 0.29      | 0          | 0.19      | 0          | NA        | NA         |
| NA        | NA         | NA        | NA         | NA        | NA         | 0.24      | 0          | 0.19      | 0          | NA        | NA         |
| NA        | NA         | NA        | NA         | NA        | NA         | 0.23      | 0          | 0.18      | 0          | NA        | NA         |
| NA        | NA         | NA        | NA         | NA        | NA         | 0.24      | 0          | 0.16      | 0          | NA        | NA         |
| NA        | NA         | NA        | NA         | NA        | NA         | 0.30      | 0          | 0.17      | 0          | NA        | NA         |
| NA        | NA         | NA        | NA         | NA        | NA         | 0.23      | 0          | 0.20      | 0          | NA        | NA         |
| NA        | NA         | NA        | NA         | NA        | NA         | 0.23      | 0          | 0.19      | 0          | NA        | NA         |
| NA        | NA         | NA        | NA         | NA        | NA         | 0.25      | 0          | 0.20      | 0          | NA        | NA         |
| NA        | NA         | NA        | NA         | NA        | NA         | 0.24      | 0          | 0.17      | 0          | NA        | NA         |
| NA        | NA         | NA        | NA         | NA        | NA         | 0.26      | 0          | 0.18      | 0          | NA        | NA         |
| NA        | NA         | NA        | NA         | NA        | NA         | 0.28      | 0          | 0.19      | 0          | NA        | NA         |
| NA        | NA         | NA        | NA         | NA        | NA         | 0.26      | 0          | 0.18      | 0          | NA        | NA         |
| NA        | NA         | NA        | NA         | NA        | NA         | 0.33      | 0          | 0.20      | 0          | NA        | NA         |
| NA        | NA         | NA        | NA         | NA        | NA         | 0.31      | 0          | 0.21      | 1          | NA        | NA         |
| NA        | NA         | NA        | NA         | NA        | NA         | 0.31      | 0          | 0.21      | 1          | NA        | NA         |
| NA        | NA         | NA        | NA         | NA        | NA         | 0.26      | 0          | 0.01      | 0          | NA        | NA         |
| NA        | NA         | NA        | NA         | NA        | NA         | 0.51      | 0          | 0.14      | 0          | NA        | NA         |
| NA        | NA         | NA        | NA         | NA        | NA         | 0.25      | 0          | 0.18      | 0          | NA        | NA         |
| NA        | NA         | NA        | NA         | NA        | NA         | 0.32      | 0          | 0.15      | 0          | NA        | NA         |
| NA        | NA         | NA        | NA         | NA        | NA         | 0.25      | 0          | 0.19      | 0          | NA        | NA         |

| time<br>A | leuko<br>A | time<br>A | leuko<br>A | time<br>B | leuko<br>B | time<br>C | leuko<br>C | time<br>D | leuko<br>D | time<br>E | leuko<br>E |
|-----------|------------|-----------|------------|-----------|------------|-----------|------------|-----------|------------|-----------|------------|
| NA        | NA         | NA        | NA         | NA        | NA         | 0.32      | 0          | 0.19      | 0          | NA        | NA         |
| NA        | NA         | NA        | NA         | NA        | NA         | 0.23      | 0          | 0.19      | 0          | NA        | NA         |
| NA        | NA         | NA        | NA         | NA        | NA         | 0.34      | 0          | 0.19      | 0          | NA        | NA         |
| NA        | NA         | NA        | NA         | NA        | NA         | 0.24      | 0          | 0.19      | 0          | NA        | NA         |
| NA        | NA         | NA        | NA         | NA        | NA         | 0.26      | 0          | 0.17      | 0          | NA        | NA         |
| NA        | NA         | NA        | NA         | NA        | NA         | 0.36      | 0          | 0.19      | 0          | NA        | NA         |
| NA        | NA         | NA        | NA         | NA        | NA         | 0.23      | 0          | 0.20      | 0          | NA        | NA         |
| NA        | NA         | NA        | NA         | NA        | NA         | 0.41      | 0          | 0.18      | 0          | NA        | NA         |
| NA        | NA         | NA        | NA         | NA        | NA         | 0.25      | 0          | 0.21      | 0          | NA        | NA         |
| NA        | NA         | NA        | NA         | NA        | NA         | 0.23      | 0          | 0.22      | 0          | NA        | NA         |
| NA        | NA         | NA        | NA         | NA        | NA         | 0.24      | 0          | 0.19      | 0          | NA        | NA         |
| NA        | NA         | NA        | NA         | NA        | NA         | 0.29      | 0          | 0.20      | 0          | NA        | NA         |
| NA        | NA         | NA        | NA         | NA        | NA         | 0.26      | 0          | 0.21      | 0          | NA        | NA         |
| NA        | NA         | NA        | NA         | NA        | NA         | 0.27      | 0          | 0.20      | 0          | NA        | NA         |
| NA        | NA         | NA        | NA         | NA        | NA         | 0.27      | 0          | 0.20      | 0          | NA        | NA         |
| NA        | NA         | NA        | NA         | NA        | NA         | 0.24      | 0          | 0.21      | 0          | NA        | NA         |
| NA        | NA         | NA        | NA         | NA        | NA         | 0.27      | 0          | 0.20      | 0          | NA        | NA         |
| NA        | NA         | NA        | NA         | NA        | NA         | 0.24      | 0          | 0.20      | 0          | NA        | NA         |
| NA        | NA         | NA        | NA         | NA        | NA         | 0.31      | 0          | 0.19      | 0          | NA        | NA         |
| NA        | NA         | NA        | NA         | NA        | NA         | 0.25      | 0          | 0.18      | 0          | NA        | NA         |
| NA        | NA         | NA        | NA         | NA        | NA         | 0.26      | 0          | 0.13      | 1          | NA        | NA         |
| NA        | NA         | NA        | NA         | NA        | NA         | 0.25      | 0          | 0.20      | 0          | NA        | NA         |
| NA        | NA         | NA        | NA         | NA        | NA         | 0.28      | 0          | 0.20      | 0          | NA        | NA         |
| NA        | NA         | NA        | NA         | NA        | NA         | 0.23      | 0          | 0.18      | 0          | NA        | NA         |
| NA        | NA         | NA        | NA         | NA        | NA         | 0.24      | 0          | 0.17      | 0          | NA        | NA         |
| NA        | NA         | NA        | NA         | NA        | NA         | 0.32      | 0          | 0.15      | 0          | NA        | NA         |
| NA        | NA         | NA        | NA         | NA        | NA         | 0.24      | 0          | 0.20      | 0          | NA        | NA         |
| NA        | NA         | NA        | NA         | NA        | NA         | 0.22      | 0          | 0.20      | 0          | NA        | NA         |
| NA        | NA         | NA        | NA         | NA        | NA         | 0.25      | 0          | 0.20      | 0          | NA        | NA         |
| NA        | NA         | NA        | NA         | NA        | NA         | 0.26      | 0          | 0.19      | 0          | NA        | NA         |
| NA        | NA         | NA        | NA         | NA        | NA         | 0.23      | 0          | 0.07      | 0          | NA        | NA         |
| NA        | NA         | NA        | NA         | NA        | NA         | 0.22      | 0          | 0.10      | 0          | NA        | NA         |
| NA        | NA         | NA        | NA         | NA        | NA         | 0.26      | 0          | 0.19      | 0          | NA        | NA         |
| NA        | NA         | NA        | NA         | NA        | NA         | 0.24      | 0          | 0.16      | 0          | NA        | NA         |
| NA        | NA         | NA        | NA         | NA        | NA         | 0.27      | 0          | 0.19      | 0          | NA        | NA         |
| NA        | NA         | NA        | NA         | NA        | NA         | 0.27      | 0          | 0.18      | 0          | NA        | NA         |
| NA        | NA         | NA        | NA         | NA        | NA         | 0.26      | 0          | 0.34      | 1          | NA        | NA         |
| NA        | NA         | NA        | NA         | NA        | NA         | 0.25      | 0          | 0.15      | 0          | NA        | NA         |
| NA        | NA         | NA        | NA         | NA        | NA         | 0.24      | 0          | 0.11      | 0          | NA        | NA         |
| NA        | NA         | NA        | NA         | NA        | NA         | 0.23      | 0          | 0.09      | 0          | NA        | NA         |
| NA        | NA         | NA        | NA         | NA        | NA         | 0.30      | 0          | 0.15      | 0          | NA        | NA         |
| NA        | NA         | NA        | NA         | NA        | NA         | 0.24      | 0          | 0.21      | 0          | NA        | NA         |
| NA        | NA         | NA        | NA         | NA        | NA         | 0.23      | 0          | 0.16      | 0          | NA        | NA         |
| NA        | NA         | NA        | NA         | NA        | NA         | 0.26      | 0          | 0.20      | 0          | NA        | NA         |
| NA        | NA         | NA        | NA         | NA        | NA         | 0.24      | 0          | 0.20      | 0          | NA        | NA         |
| NA        | NA         | NA        | NA         | NA        | NA         | 0.35      | 0          | 0.18      | 0          | NA        | NA         |
| NA        | NA         | NA        | NA         | NA        | NA         | 0.27      | 0          | 0.19      | 0          | NA        | NA         |
| NA        | NA         | NA        | NA         | NA        | NA         | 0.24      | 0          | 0.19      | 0          | NA        | NA         |
| NA        | NA         | NA        | NA         | NA        | NA         | 0.22      | 0          | 0.20      | 0          | NA        | NA         |
| NA        | NA         | NA        | NA         | NA        | NA         | 0.27      | 0          | 0.20      | 0          | NA        | NA         |
| NA        | NA         | NA        | NA         | NA        | NA         | 0.22      | 0          | 0.21      | 0          | NA        | NA         |

| time<br>A | leuko<br>A | time<br>A | leuko<br>A | time<br>B | leuko<br>B | time<br>C | leuko<br>C | time<br>D | leuko<br>D | time<br>E | leuko<br>E |
|-----------|------------|-----------|------------|-----------|------------|-----------|------------|-----------|------------|-----------|------------|
| NA        | NA         | NA        | NA         | NA        | NA         | 0.25      | 0          | 0.20      | 0          | NA        | NA         |
| NA        | NA         | NA        | NA         | NA        | NA         | 0.46      | 0          | 0.20      | 0          | NA        | NA         |
| NA        | NA         | NA        | NA         | NA        | NA         | 0.24      | 0          | 0.22      | 0          | NA        | NA         |
| NA        | NA         | NA        | NA         | NA        | NA         | 0.26      | 0          | 0.21      | 0          | NA        | NA         |
| NA        | NA         | NA        | NA         | NA        | NA         | 0.30      | 0          | 0.20      | 0          | NA        | NA         |
| NA        | NA         | NA        | NA         | NA        | NA         | 0.24      | 0          | 0.19      | 0          | NA        | NA         |
| NA        | NA         | NA        | NA         | NA        | NA         | 0.33      | 0          | 0.16      | 0          | NA        | NA         |
| NA        | NA         | NA        | NA         | NA        | NA         | 0.20      | 0          | 0.12      | 1          | NA        | NA         |
| NA        | NA         | NA        | NA         | NA        | NA         | 0.49      | 0          | 0.21      | 0          | NA        | NA         |
| NA        | NA         | NA        | NA         | NA        | NA         | 0.22      | 0          | 0.26      | 0          | NA        | NA         |
| NA        | NA         | NA        | NA         | NA        | NA         | 0.37      | 0          | 0.25      | 0          | NA        | NA         |
| NA        | NA         | NA        | NA         | NA        | NA         | 0.22      | 0          | 0.23      | 0          | NA        | NA         |
| NA        | NA         | NA        | NA         | NA        | NA         | 0.29      | 0          | 0.21      | 0          | NA        | NA         |
| NA        | NA         | NA        | NA         | NA        | NA         | 0.25      | 0          | 0.21      | 0          | NA        | NA         |
| NA        | NA         | NA        | NA         | NA        | NA         | 0.26      | 0          | 0.21      | 0          | NA        | NA         |
| NA        | NA         | NA        | NA         | NA        | NA         | 0.25      | 0          | 0.21      | 0          | NA        | NA         |
| NA        | NA         | NA        | NA         | NA        | NA         | 0.24      | 0          | 0.20      | 0          | NA        | NA         |
| NA        | NA         | NA        | NA         | NA        | NA         | 0.28      | 0          | 0.21      | 0          | NA        | NA         |
| NA        | NA         | NA        | NA         | NA        | NA         | 0.55      | 0          | 0.20      | 0          | NA        | NA         |
| NA        | NA         | NA        | NA         | NA        | NA         | 0.20      | 0          | 0.21      | 0          | NA        | NA         |
| NA        | NA         | NA        | NA         | NA        | NA         | 0.29      | 0          | 0.20      | 0          | NA        | NA         |
| NA        | NA         | NA        | NA         | NA        | NA         | 0.35      | 0          | 0.24      | 1          | NA        | NA         |
| NA        | NA         | NA        | NA         | NA        | NA         | 0.25      | 0          | 0.30      | 1          | NA        | NA         |
| NA        | NA         | NA        | NA         | NA        | NA         | 0.41      | 0          | 0.09      | 0          | NA        | NA         |
| NA        | NA         | NA        | NA         | NA        | NA         | 0.79      | 0          | 0.28      | 0          | NA        | NA         |
| NA        | NA         | NA        | NA         | NA        | NA         | 0.33      | 0          | 0.22      | 0          | NA        | NA         |
| NA        | NA         | NA        | NA         | NA        | NA         | 0.20      | 0          | 0.22      | 0          | NA        | NA         |
| NA        | NA         | NA        | NA         | NA        | NA         | 0.21      | 0          | 0.20      | 0          | NA        | NA         |
| NA        | NA         | NA        | NA         | NA        | NA         | 0.28      | 0          | 0.09      | 1          | NA        | NA         |
| NA        | NA         | NA        | NA         | NA        | NA         | 0.26      | 0          | 0.23      | 0          | NA        | NA         |
| NA        | NA         | NA        | NA         | NA        | NA         | 0.39      | 0          | 0.25      | 0          | NA        | NA         |
| NA        | NA         | NA        | NA         | NA        | NA         | 0.25      | 0          | 0.24      | 0          | NA        | NA         |
| NA        | NA         | NA        | NA         | NA        | NA         | 0.25      | 0          | 0.20      | 0          | NA        | NA         |
| NA        | NA         | NA        | NA         | NA        | NA         | 0.27      | 0          | 0.20      | 0          | NA        | NA         |
| NA        | NA         | NA        | NA         | NA        | NA         | 0.36      | 0          | 0.20      | 0          | NA        | NA         |
| NA        | NA         | NA        | NA         | NA        | NA         | 0.22      | 0          | 0.19      | 0          | NA        | NA         |
| NA        | NA         | NA        | NA         | NA        | NA         | 0.25      | 0          | 0.20      | 0          | NA        | NA         |
| NA        | NA         | NA        | NA         | NA        | NA         | 0.49      | 0          | 0.18      | 0          | NA        | NA         |
| NA        | NA         | NA        | NA         | NA        | NA         | 0.30      | 0          | 0.20      | 0          | NA        | NA         |
| NA        | NA         | NA        | NA         | NA        | NA         | 0.28      | 0          | 0.18      | 0          | NA        | NA         |
| NA        | NA         | NA        | NA         | NA        | NA         | 0.82      | 0          | 0.23      | 0          | NA        | NA         |
| NA        | NA         | NA        | NA         | NA        | NA         | 0.23      | 0          | 0.26      | 0          | NA        | NA         |
| NA        | NA         | NA        | NA         | NA        | NA         | 0.25      | 0          | 0.22      | 0          | NA        | NA         |
| NA        | NA         | NA        | NA         | NA        | NA         | 0.32      | 0          | 0.21      | 0          | NA        | NA         |
| NA        | NA         | NA        | NA         | NA        | NA         | 0.33      | 0          | 0.20      | 0          | NA        | NA         |
| NA        | NA         | NA        | NA         | NA        | NA         | 0.40      | 0          | 0.19      | 0          | NA        | NA         |
| NA        | NA         | NA        | NA         | NA        | NA         | 0.24      | 0          | 0.21      | 0          | NA        | NA         |
| NA        | NA         | NA        | NA         | NA        | NA         | 0.24      | 0          | 0.19      | 0          | NA        | NA         |
| NA        | NA         | NA        | NA         | NA        | NA         | 0.33      | 0          | 0.15      | 1          | NA        | NA         |
| NA        | NA         | NA        | NA         | NA        | NA         | 0.28      | 0          | 0.16      | 0          | NA        | NA         |
| NA        | NA         | NA        | NA         | NA        | NA         | 0.41      | 0          | 0.22      | 0          | NA        | NA         |

| time<br>A | leuko<br>A | time<br>A | leuko<br>A | time<br>B | leuko<br>B | time<br>C | leuko<br>C | time<br>D | leuko<br>D | time<br>E | leuko<br>E |
|-----------|------------|-----------|------------|-----------|------------|-----------|------------|-----------|------------|-----------|------------|
| NA        | NA         | NA        | NA         | NA        | NA         | 0.25      | 0          | 0.14      | 0          | NA        | NA         |
| NA        | NA         | NA        | NA         | NA        | NA         | 0.23      | 0          | 0.19      | 0          | NA        | NA         |
| NA        | NA         | NA        | NA         | NA        | NA         | 0.27      | 0          | 0.20      | 0          | NA        | NA         |
| NA        | NA         | NA        | NA         | NA        | NA         | 0.23      | 0          | 0.20      | 0          | NA        | NA         |
| NA        | NA         | NA        | NA         | NA        | NA         | 0.24      | 0          | 0.14      | 1          | NA        | NA         |
| NA        | NA         | NA        | NA         | NA        | NA         | 0.38      | 0          | 0.20      | 0          | NA        | NA         |
| NA        | NA         | NA        | NA         | NA        | NA         | 0.29      | 0          | 0.25      | 0          | NA        | NA         |
| NA        | NA         | NA        | NA         | NA        | NA         | 0.39      | 0          | 0.22      | 0          | NA        | NA         |
| NA        | NA         | NA        | NA         | NA        | NA         | 0.32      | 0          | 0.20      | 0          | NA        | NA         |
| NA        | NA         | NA        | NA         | NA        | NA         | 0.22      | 0          | 0.19      | 0          | NA        | NA         |
| NA        | NA         | NA        | NA         | NA        | NA         | 0.22      | 0          | 0.21      | 0          | NA        | NA         |
| NA        | NA         | NA        | NA         | NA        | NA         | 0.22      | 0          | 0.19      | 0          | NA        | NA         |
| NA        | NA         | NA        | NA         | NA        | NA         | 0.24      | 0          | 0.21      | 0          | NA        | NA         |
| NA        | NA         | NA        | NA         | NA        | NA         | 0.40      | 0          | 0.22      | 0          | NA        | NA         |
| NA        | NA         | NA        | NA         | NA        | NA         | 0.21      | 0          | 0.19      | 0          | NA        | NA         |
| NA        | NA         | NA        | NA         | NA        | NA         | 0.22      | 0          | 0.22      | 0          | NA        | NA         |
| NA        | NA         | NA        | NA         | NA        | NA         | 0.26      | 0          | 0.20      | 0          | NA        | NA         |
| NA        | NA         | NA        | NA         | NA        | NA         | 0.43      | 0          | 0.21      | 0          | NA        | NA         |
| NA        | NA         | NA        | NA         | NA        | NA         | 0.32      | 0          | 0.19      | 0          | NA        | NA         |
| NA        | NA         | NA        | NA         | NA        | NA         | 0.34      | 0          | 0.21      | 0          | NA        | NA         |
| NA        | NA         | NA        | NA         | NA        | NA         | 0.31      | 0          | 0.19      | 0          | NA        | NA         |
| NA        | NA         | NA        | NA         | NA        | NA         | 0.26      | 0          | 0.22      | 0          | NA        | NA         |
| NA        | NA         | NA        | NA         | NA        | NA         | 0.26      | 0          | 0.16      | 0          | NA        | NA         |
| NA        | NA         | NA        | NA         | NA        | NA         | 0.21      | 0          | 0.21      | 0          | NA        | NA         |
| NA        | NA         | NA        | NA         | NA        | NA         | 0.23      | 0          | 0.17      | 0          | NA        | NA         |
| NA        | NA         | NA        | NA         | NA        | NA         | 0.25      | 0          | 0.11      | 1          | NA        | NA         |
| NA        | NA         | NA        | NA         | NA        | NA         | 0.30      | 0          | 0.17      | 0          | NA        | NA         |
| NA        | NA         | NA        | NA         | NA        | NA         | 0.35      | 0          | 0.23      | 0          | NA        | NA         |
| NA        | NA         | NA        | NA         | NA        | NA         | 0.17      | 0          | 0.19      | 0          | NA        | NA         |
| NA        | NA         | NA        | NA         | NA        | NA         | 0.26      | 0          | 0.22      | 0          | NA        | NA         |
| NA        | NA         | NA        | NA         | NA        | NA         | 0.23      | 0          | 0.20      | 0          | NA        | NA         |
| NA        | NA         | NA        | NA         | NA        | NA         | 0.27      | 0          | 0.20      | 0          | NA        | NA         |
| NA        | NA         | NA        | NA         | NA        | NA         | 0.29      | 0          | 0.21      | 0          | NA        | NA         |
| NA        | NA         | NA        | NA         | NA        | NA         | 0.27      | 0          | 0.19      | 0          | NA        | NA         |
| NA        | NA         | NA        | NA         | NA        | NA         | 0.24      | 0          | 0.20      | 0          | NA        | NA         |
| NA        | NA         | NA        | NA         | NA        | NA         | 0.23      | 0          | 0.20      | 0          | NA        | NA         |
| NA        | NA         | NA        | NA         | NA        | NA         | 0.25      | 0          | 0.19      | 0          | NA        | NA         |
| NA        | NA         | NA        | NA         | NA        | NA         | 0.34      | 0          | 0.18      | 0          | NA        | NA         |
| NA        | NA         | NA        | NA         | NA        | NA         | 0.26      | 0          | 0.18      | 0          | NA        | NA         |
| NA        | NA         | NA        | NA         | NA        | NA         | 0.24      | 0          | 0.18      | 0          | NA        | NA         |
| NA        | NA         | NA        | NA         | NA        | NA         | 0.22      | 0          | 0.20      | 0          | NA        | NA         |
| NA        | NA         | NA        | NA         | NA        | NA         | 0.26      | 0          | 0.17      | 1          | NA        | NA         |
| NA        | NA         | NA        | NA         | NA        | NA         | 0.22      | 0          | 0.19      | 0          | NA        | NA         |
| NA        | NA         | NA        | NA         | NA        | NA         | 0.29      | 0          | 0.35      | 0          | NA        | NA         |
| NA        | NA         | NA        | NA         | NA        | NA         | 0.46      | 0          | 0.30      | 0          | NA        | NA         |
| NA        | NA         | NA        | NA         | NA        | NA         | 0.23      | 0          | 0.22      | 0          | NA        | NA         |
| NA        | NA         | NA        | NA         | NA        | NA         | 0.27      | 0          | NA        | NA         | NA        | NA         |
| NA        | NA         | NA        | NA         | NA        | NA         | 0.25      | 0          | NA        | NA         | NA        | NA         |
| NA        | NA         | NA        | NA         | NA        | NA         | 0.29      | 0          | NA        | NA         | NA        | NA         |
| NA        | NA         | NA        | NA         | NA        | NA         | 0.29      | 0          | NA        | NA         | NA        | NA         |
| NA        | NA         | NA        | NA         | NA        | NA         | 0.33      | 0          | NA        | NA         | NA        | NA         |



| time<br>A | leuko<br>A | time<br>A | leuko<br>A | time<br>B | leuko<br>B | time<br>C | leuko<br>C | time<br>D | leuko<br>D | time<br>E | leuko<br>E |
|-----------|------------|-----------|------------|-----------|------------|-----------|------------|-----------|------------|-----------|------------|
| NA        | NA         | NA        | NA         | NA        | NA         | 0.36      | 0          | NA        | NA         | NA        | NA         |
| NA        | NA         | NA        | NA         | NA        | NA         | 0.23      | 0          | NA        | NA         | NA        | NA         |
| NA        | NA         | NA        | NA         | NA        | NA         | 0.28      | 0          | NA        | NA         | NA        | NA         |
| NA        | NA         | NA        | NA         | NA        | NA         | 0.30      | 0          | NA        | NA         | NA        | NA         |
| NA        | NA         | NA        | NA         | NA        | NA         | 0.26      | 0          | NA        | NA         | NA        | NA         |
| NA        | NA         | NA        | NA         | NA        | NA         | 0.31      | 0          | NA        | NA         | NA        | NA         |
| NA        | NA         | NA        | NA         | NA        | NA         | 1.14      | 0          | NA        | NA         | NA        | NA         |
| NA        | NA         | NA        | NA         | NA        | NA         | 0.26      | 0          | NA        | NA         | NA        | NA         |
| NA        | NA         | NA        | NA         | NA        | NA         | 0.24      | 0          | NA        | NA         | NA        | NA         |

## 1.5 OPT257

Table 5: Raw data of TBS OPT257.

| time<br>A | leuko<br>A | time<br>A | leuko<br>A | time<br>B | leuko<br>B | time<br>C | leuko<br>C | time<br>D | leuko<br>D | time<br>E | leuko<br>E |
|-----------|------------|-----------|------------|-----------|------------|-----------|------------|-----------|------------|-----------|------------|
| 0.00      | 1          | 0.00      | 1          | 0.00      | 1          | 0.00      | 1          | 0.00      | 1          | 0.00      | 1          |
| 0.25      | 1          | 0.28      | 1          | 0.28      | 1          | 0.29      | 1          | 0.23      | 1          | 0.27      | 1          |
| 0.21      | 1          | 0.33      | 1          | 0.22      | 1          | 0.38      | 1          | 0.23      | 1          | 0.26      | 1          |
| 0.15      | 1          | 0.28      | 1          | 0.25      | 1          | 0.27      | 1          | 0.22      | 1          | 0.27      | 1          |
| 0.19      | 1          | 0.19      | 1          | 0.45      | 1          | 0.38      | 1          | 0.41      | 1          | 0.25      | 1          |
| 0.26      | 1          | 0.17      | 1          | 0.27      | 1          | 0.23      | 1          | 0.22      | 1          | 0.25      | 1          |
| 0.21      | 1          | 0.18      | 1          | 0.24      | 1          | 0.38      | 1          | 0.26      | 1          | 0.53      | 1          |
| 0.20      | 1          | 0.21      | 1          | 0.23      | 1          | 0.31      | 1          | 0.23      | 1          | 0.26      | 1          |
| 4.49      | 1          | 0.20      | 1          | 0.21      | 1          | 0.20      | 1          | 0.29      | 1          | 0.25      | 1          |
| 0.24      | 1          | 0.72      | 1          | 0.28      | 1          | 0.36      | 1          | 0.34      | 1          | 0.25      | 1          |
| 0.19      | 1          | 0.23      | 1          | 3.29      | 1          | 0.20      | 1          | 0.77      | 1          | 0.22      | 1          |
| 0.20      | 1          | 0.26      | 1          | 4.80      | 1          | 0.07      | 1          | 0.24      | 1          | 0.08      | 1          |
| 0.19      | 1          | 1.77      | 1          | 0.30      | 1          | 0.14      | 1          | 0.32      | 1          | 5.42      | 1          |
| 0.20      | 1          | 0.22      | 1          | 0.24      | 1          | 0.07      | 1          | 0.20      | 1          | 0.26      | 1          |
| 0.38      | 1          | 0.16      | 1          | 0.25      | 1          | 0.10      | 1          | 0.24      | 1          | 0.30      | 1          |
| 0.18      | 1          | 0.17      | 1          | 7.61      | 1          | 0.27      | 1          | 3.43      | 1          | 0.26      | 1          |
| 7.20      | 1          | 0.16      | 1          | 0.27      | 1          | 0.38      | 1          | 9.57      | 1          | 0.38      | 1          |
| 0.22      | 1          | 0.16      | 1          | 0.22      | 1          | 0.26      | 1          | 0.21      | 1          | 0.29      | 1          |
| 0.20      | 1          | 0.14      | 1          | 0.23      | 1          | 0.12      | 1          | 0.44      | 1          | 0.29      | 1          |
| 0.20      | 1          | 0.17      | 1          | 0.21      | 1          | 8.61      | 0          | 0.26      | 1          | 0.29      | 1          |
| 0.19      | 1          | 0.17      | 1          | 0.30      | 1          | 0.64      | 1          | 0.71      | 1          | 0.28      | 1          |
| 0.18      | 1          | 0.16      | 1          | 0.24      | 1          | 0.08      | 1          | 0.22      | 1          | 0.29      | 1          |
| 0.19      | 1          | 0.16      | 1          | 0.23      | 1          | 0.11      | 1          | 0.23      | 1          | 5.70      | 1          |
| 0.18      | 1          | 0.17      | 1          | 0.19      | 1          | 0.23      | 1          | 0.46      | 1          | 0.25      | 1          |
| 0.19      | 1          | 0.16      | 1          | 0.26      | 1          | 0.20      | 1          | 0.39      | 1          | 0.25      | 1          |
| 2.51      | 1          | 0.17      | 1          | 0.23      | 1          | 0.20      | 1          | 0.46      | 1          | 0.25      | 1          |
| 0.21      | 1          | 0.20      | 1          | 0.21      | 1          | 0.37      | 1          | 1.12      | 1          | 0.26      | 1          |
| 0.17      | 1          | 1.52      | 1          | 0.20      | 1          | 0.21      | 1          | 9.07      | 1          | 0.27      | 1          |
| 0.17      | 1          | 0.22      | 1          | 4.85      | 1          | 0.26      | 1          | 0.20      | 1          | 0.29      | 1          |
| 0.17      | 1          | 0.17      | 1          | 0.27      | 1          | 0.23      | 1          | 0.29      | 1          | 0.32      | 1          |
| 0.16      | 1          | 0.18      | 1          | 0.24      | 1          | 0.21      | 1          | 0.73      | 1          | 0.26      | 1          |
| 0.15      | 1          | 0.17      | 1          | 0.20      | 1          | 0.27      | 1          | 0.29      | 1          | 0.25      | 1          |
| 0.16      | 1          | 0.18      | 1          | 0.27      | 1          | 5.33      | 1          | 0.23      | 1          | 6.44      | 1          |
| 0.15      | 1          | 0.14      | 1          | 0.24      | 1          | 0.19      | 1          | 0.28      | 1          | 0.28      | 1          |
| 0.17      | 1          | 0.19      | 1          | 0.48      | 1          | 0.21      | 1          | 0.26      | 1          | 0.64      | 1          |
| 0.32      | 1          | 0.17      | 1          | 5.57      | 1          | 0.26      | 1          | 0.23      | 1          | 0.28      | 1          |
| 0.16      | 1          | 0.16      | 1          | 0.25      | 1          | 0.08      | 1          | 0.26      | 1          | 0.29      | 1          |
| 0.18      | 1          | 0.14      | 1          | 0.22      | 1          | 0.12      | 1          | 0.30      | 1          | 0.27      | 1          |
| 0.18      | 1          | 2.07      | 1          | 0.23      | 1          | 0.20      | 1          | 0.56      | 1          | 0.27      | 1          |
| 2.88      | 1          | 0.26      | 1          | 0.21      | 1          | 0.22      | 1          | 0.24      | 1          | 0.28      | 1          |
| 0.20      | 1          | 0.19      | 1          | 0.22      | 1          | 0.22      | 1          | 0.22      | 1          | 7.15      | 1          |
| 0.19      | 1          | 0.18      | 1          | 0.22      | 1          | 0.19      | 1          | 0.28      | 1          | 0.26      | 1          |
| 0.34      | 1          | 0.18      | 1          | 2.50      | 1          | 0.20      | 1          | 0.35      | 1          | 0.26      | 1          |
| 0.20      | 1          | 0.16      | 1          | 0.30      | 1          | 0.19      | 1          | 1.30      | 1          | 0.29      | 1          |
| 0.17      | 1          | 0.19      | 1          | 0.29      | 1          | 0.21      | 1          | 8.16      | 1          | 0.32      | 1          |
| 0.18      | 1          | 1.86      | 1          | 0.27      | 1          | 0.20      | 1          | 0.27      | 1          | 0.30      | 1          |
| 0.19      | 1          | 0.24      | 1          | 0.33      | 1          | 0.20      | 1          | 0.59      | 1          | 0.30      | 1          |
| 0.18      | 1          | 0.19      | 1          | 0.26      | 1          | 0.24      | 1          | 0.20      | 1          | 0.27      | 1          |

| time<br>A | leuko<br>A | time<br>A | leuko<br>A | time<br>B | leuko<br>B | time<br>C | leuko<br>C | time<br>D | leuko<br>D | time<br>E | leuko<br>E |
|-----------|------------|-----------|------------|-----------|------------|-----------|------------|-----------|------------|-----------|------------|
| 0.18      | 1          | 0.17      | 1          | 0.24      | 1          | 0.23      | 1          | 0.18      | 1          | 0.30      | 1          |
| 0.13      | 1          | 0.18      | 1          | 0.30      | 1          | 0.24      | 1          | 0.55      | 1          | 0.25      | 1          |
| 0.18      | 1          | 0.19      | 1          | 0.39      | 1          | 0.22      | 1          | 0.28      | 1          | 0.23      | 1          |
| 0.19      | 1          | 0.16      | 1          | 0.33      | 1          | 0.22      | 1          | 0.54      | 1          | 6.05      | 1          |
| 0.18      | 1          | 0.18      | 1          | 3.63      | 1          | 0.22      | 1          | 0.33      | 1          | 0.29      | 1          |
| 0.20      | 1          | 0.19      | 1          | 0.33      | 1          | 0.21      | 1          | 0.21      | 1          | 0.24      | 1          |
| 0.19      | 1          | 0.20      | 1          | 0.26      | 1          | 0.20      | 1          | 0.20      | 1          | 0.30      | 1          |
| 0.18      | 1          | 0.18      | 1          | 0.24      | 1          | 0.29      | 1          | 16.24     | 1          | 0.31      | 1          |
| 2.13      | 1          | 0.18      | 1          | 0.35      | 1          | 0.80      | 1          | 0.23      | 1          | 0.26      | 1          |
| 0.21      | 1          | 0.18      | 1          | 0.27      | 1          | 0.32      | 1          | 0.23      | 1          | 0.28      | 1          |
| 0.19      | 1          | 0.16      | 1          | 0.25      | 1          | 3.77      | 1          | 0.26      | 1          | 0.30      | 1          |
| 0.17      | 1          | 3.34      | 1          | 0.22      | 1          | 0.22      | 1          | 0.23      | 1          | 0.25      | 1          |
| 0.19      | 1          | 0.28      | 1          | 0.37      | 1          | 0.21      | 1          | 0.22      | 1          | 0.26      | 1          |
| 0.18      | 1          | 0.15      | 1          | 0.26      | 1          | 0.25      | 1          | 0.22      | 1          | 0.28      | 1          |
| 0.18      | 1          | 0.18      | 1          | 0.40      | 1          | 0.20      | 1          | 0.19      | 1          | 0.30      | 1          |
| 0.18      | 1          | 0.17      | 1          | 0.27      | 1          | 0.20      | 1          | 0.23      | 1          | 0.27      | 1          |
| 0.16      | 1          | 0.17      | 1          | 0.24      | 1          | 0.22      | 1          | 0.21      | 1          | 0.32      | 1          |
| 6.56      | 1          | 0.16      | 1          | 0.23      | 1          | 0.22      | 1          | 0.21      | 1          | 5.99      | 1          |
| 0.23      | 1          | 0.19      | 1          | 3.21      | 1          | 0.22      | 1          | 0.19      | 1          | 0.27      | 1          |
| 0.19      | 1          | 0.17      | 1          | 0.28      | 1          | 0.22      | 1          | 0.21      | 1          | 0.27      | 1          |
| 0.21      | 1          | 0.17      | 1          | 0.25      | 1          | 0.22      | 1          | 0.48      | 1          | 0.27      | 1          |
| 0.19      | 1          | 0.16      | 1          | 0.24      | 1          | 0.23      | 1          | 0.20      | 1          | 0.27      | 1          |
| 0.21      | 1          | 2.35      | 1          | 0.23      | 1          | 0.23      | 1          | 8.78      | 1          | 0.24      | 1          |
| 0.16      | 1          | 0.25      | 1          | 0.30      | 1          | 0.20      | 1          | 0.21      | 1          | 0.45      | 1          |
| 0.17      | 1          | 0.20      | 1          | 0.23      | 1          | 0.22      | 1          | 0.17      | 1          | 0.29      | 1          |
| 0.17      | 1          | 0.32      | 1          | 3.15      | 1          | 0.21      | 1          | 0.43      | 1          | 0.26      | 1          |
| 0.17      | 1          | 0.19      | 1          | 0.29      | 1          | 0.43      | 1          | 0.19      | 1          | 0.28      | 1          |
| 0.17      | 1          | 0.17      | 1          | 0.45      | 1          | 0.22      | 1          | 1.78      | 1          | 0.31      | 1          |
| 2.21      | 1          | 0.18      | 1          | 0.27      | 1          | 0.06      | 1          | 0.22      | 1          | 0.27      | 1          |
| 0.25      | 1          | 0.18      | 1          | 0.25      | 1          | 0.27      | 1          | 0.19      | 1          | 3.83      | 1          |
| 0.18      | 1          | 0.18      | 1          | 0.27      | 1          | 5.81      | 1          | 0.21      | 1          | 0.25      | 1          |
| 0.17      | 1          | 0.17      | 1          | 0.25      | 1          | 0.22      | 1          | 1.00      | 1          | 0.29      | 1          |
| 0.16      | 1          | 0.18      | 1          | 2.53      | 1          | 0.25      | 1          | 0.19      | 1          | 0.28      | 1          |
| 0.19      | 1          | 0.16      | 1          | 0.26      | 1          | 0.21      | 1          | 0.25      | 1          | 0.28      | 1          |
| 0.12      | 1          | 0.19      | 1          | 0.22      | 1          | 0.06      | 1          | 0.18      | 1          | 0.28      | 1          |
| 0.17      | 1          | 0.18      | 1          | 0.22      | 1          | 0.12      | 1          | 0.48      | 1          | 0.30      | 1          |
| 0.15      | 1          | 2.68      | 1          | 0.21      | 1          | 0.31      | 1          | 0.20      | 1          | 5.50      | 1          |
| 0.18      | 1          | 0.19      | 1          | 0.36      | 1          | 0.42      | 1          | 0.17      | 1          | 0.26      | 1          |
| 0.16      | 1          | 0.19      | 1          | 0.24      | 1          | 0.20      | 1          | 0.31      | 1          | 0.27      | 1          |
| 0.17      | 1          | 0.35      | 1          | 0.23      | 1          | 0.22      | 1          | 0.22      | 1          | 0.27      | 1          |
| 0.18      | 1          | 0.20      | 1          | 0.21      | 1          | 0.21      | 1          | 0.20      | 1          | 0.27      | 1          |
| 0.17      | 1          | 0.18      | 1          | 0.21      | 1          | 0.19      | 1          | 8.11      | 1          | 0.27      | 1          |
| 0.16      | 1          | 0.18      | 1          | 0.28      | 1          | 1.71      | 1          | 0.24      | 1          | 0.27      | 1          |
| 0.20      | 1          | 0.20      | 1          | 0.20      | 1          | 0.26      | 1          | 0.19      | 1          | 0.26      | 1          |
| 1.91      | 1          | 0.17      | 1          | 0.23      | 1          | 1.03      | 1          | 0.20      | 1          | 0.24      | 1          |
| 0.42      | 1          | 0.17      | 1          | 0.33      | 1          | 5.17      | 0          | 0.16      | 1          | 0.27      | 1          |
| 0.19      | 1          | 0.20      | 1          | 0.26      | 1          | 0.64      | 1          | 0.19      | 1          | 3.47      | 1          |
| 0.19      | 1          | 0.19      | 1          | 0.24      | 1          | 0.10      | 1          | 0.22      | 1          | 0.31      | 1          |
| 0.15      | 1          | 0.18      | 1          | 0.21      | 1          | 0.15      | 1          | 0.20      | 1          | 0.27      | 1          |
| 0.17      | 1          | 0.18      | 1          | 3.85      | 1          | 0.21      | 1          | 0.55      | 1          | 0.24      | 1          |
| 0.16      | 1          | 0.18      | 1          | 0.28      | 1          | 0.21      | 1          | 0.24      | 1          | 0.25      | 1          |

| time<br>A | leuko<br>A | time<br>A | leuko<br>A | time<br>B | leuko<br>B | time<br>C | leuko<br>C | time<br>D | leuko<br>D | time<br>E | leuko<br>E |
|-----------|------------|-----------|------------|-----------|------------|-----------|------------|-----------|------------|-----------|------------|
| 0.15      | 1          | 0.19      | 1          | 0.25      | 1          | 0.21      | 1          | 0.18      | 1          | 3.72      | 1          |
| 0.12      | 1          | 0.19      | 1          | 0.24      | 1          | 0.23      | 1          | 0.20      | 1          | 0.26      | 1          |
| 0.18      | 1          | 0.20      | 1          | 0.23      | 1          | 0.75      | 1          | 8.66      | 1          | 0.29      | 1          |
| 0.17      | 1          | 0.17      | 1          | 0.34      | 1          | 0.23      | 1          | 0.23      | 1          | 0.84      | 1          |
| 0.18      | 1          | 2.03      | 1          | 0.25      | 1          | 0.27      | 1          | 0.33      | 1          | 0.32      | 1          |
| 0.16      | 1          | 0.20      | 1          | 0.23      | 1          | 0.96      | 1          | 0.24      | 1          | 0.62      | 1          |
| 0.20      | 1          | 0.18      | 1          | 0.24      | 1          | 0.22      | 1          | 0.35      | 1          | 0.24      | 1          |
| 0.17      | 1          | 0.16      | 1          | 0.23      | 1          | 0.19      | 1          | 0.22      | 1          | 0.32      | 1          |
| 0.17      | 1          | 0.19      | 1          | 0.35      | 1          | 0.10      | 1          | 0.27      | 1          | 0.27      | 1          |
| 0.18      | 1          | 0.18      | 1          | 0.28      | 1          | 0.16      | 1          | 0.28      | 1          | 1.16      | 1          |
| 5.41      | 1          | 0.19      | 1          | 7.90      | 1          | 0.21      | 1          | 0.23      | 1          | 4.33      | 1          |
| 0.24      | 1          | 0.17      | 1          | 0.28      | 1          | 0.20      | 1          | 0.22      | 1          | 0.28      | 1          |
| 0.19      | 1          | 0.19      | 1          | 0.25      | 1          | 0.57      | 1          | 0.20      | 1          | 0.27      | 1          |
| 0.16      | 1          | 0.19      | 1          | 0.22      | 1          | 3.81      | 1          | 0.19      | 1          | 0.26      | 1          |
| 0.18      | 1          | 0.19      | 1          | 0.23      | 1          | 0.22      | 1          | 11.65     | 1          | 0.29      | 1          |
| 0.18      | 1          | 0.17      | 1          | 0.38      | 1          | 0.22      | 1          | 0.23      | 1          | 0.30      | 1          |
| 0.17      | 1          | 0.19      | 1          | 0.26      | 1          | 0.23      | 1          | 0.31      | 1          | 0.31      | 1          |
| 0.20      | 1          | 0.20      | 1          | 0.23      | 1          | 0.20      | 1          | 0.23      | 1          | 0.28      | 1          |
| 0.18      | 1          | 0.17      | 1          | 0.21      | 1          | 0.21      | 1          | 0.37      | 1          | 0.28      | 1          |
| 0.15      | 1          | 22.19     | 1          | 0.35      | 1          | 0.20      | 1          | 0.23      | 1          | 0.89      | 1          |
| 0.18      | 1          | 0.29      | 1          | 0.24      | 1          | 0.22      | 1          | 0.57      | 1          | 0.29      | 1          |
| 0.19      | 1          | 0.36      | 1          | 0.23      | 1          | 0.40      | 1          | 0.20      | 1          | 0.24      | 1          |
| 0.18      | 1          | 0.19      | 1          | 0.21      | 1          | 0.20      | 1          | 0.33      | 1          | 4.51      | 1          |
| 0.16      | 1          | 0.17      | 1          | 5.30      | 1          | 0.22      | 1          | 0.20      | 1          | 0.24      | 1          |
| 0.17      | 1          | 0.19      | 1          | 0.27      | 1          | 0.21      | 1          | 0.27      | 1          | 0.27      | 1          |
| 0.19      | 1          | 0.17      | 1          | 0.24      | 1          | 0.20      | 1          | 0.28      | 1          | 0.27      | 1          |
| 5.68      | 1          | 0.11      | 1          | 0.61      | 1          | 0.24      | 1          | 0.20      | 1          | 0.27      | 1          |
| 0.23      | 1          | 0.24      | 1          | 0.25      | 1          | 0.24      | 1          | 0.20      | 1          | 0.29      | 1          |
| 0.18      | 1          | 0.22      | 1          | 0.23      | 1          | 0.22      | 1          | 0.30      | 1          | 0.46      | 1          |
| 0.20      | 1          | 0.22      | 1          | 0.22      | 1          | 0.21      | 1          | 0.21      | 1          | 0.32      | 1          |
| 0.19      | 1          | 0.13      | 1          | 0.22      | 1          | 0.20      | 1          | 0.79      | 1          | 0.30      | 1          |
| 0.18      | 1          | 0.23      | 1          | 0.25      | 1          | 0.22      | 1          | 0.20      | 1          | 0.31      | 1          |
| 0.17      | 1          | 0.15      | 1          | 0.24      | 1          | 0.20      | 1          | 0.20      | 1          | 0.28      | 1          |
| 0.17      | 1          | 0.18      | 1          | 0.39      | 1          | 0.21      | 1          | 0.19      | 1          | 0.30      | 1          |
| 0.18      | 1          | 0.20      | 1          | 0.25      | 1          | 0.07      | 1          | 0.16      | 1          | 0.25      | 1          |
| 0.19      | 1          | 0.18      | 1          | 0.20      | 1          | 0.12      | 1          | 7.30      | 1          | 5.01      | 1          |
| 0.19      | 1          | 0.18      | 1          | 8.45      | 1          | 0.42      | 1          | 0.20      | 1          | 0.25      | 1          |
| 0.19      | 1          | 0.19      | 1          | 0.28      | 1          | 0.22      | 1          | 0.16      | 1          | 0.29      | 1          |
| 0.20      | 1          | 0.22      | 1          | 0.23      | 1          | 0.21      | 1          | 0.20      | 1          | 0.40      | 1          |
| 0.18      | 1          | 7.00      | 1          | 0.20      | 1          | 0.22      | 1          | 0.31      | 1          | 0.39      | 1          |
| 0.18      | 1          | 0.26      | 1          | 0.36      | 1          | 0.20      | 1          | 0.56      | 1          | 0.29      | 1          |
| 0.19      | 1          | 0.40      | 1          | 0.25      | 1          | 0.21      | 1          | 0.20      | 1          | 0.40      | 1          |
| 0.23      | 1          | 0.21      | 1          | 0.37      | 1          | 0.38      | 1          | 0.19      | 1          | 0.35      | 1          |
| 0.20      | 1          | 0.20      | 1          | 0.24      | 1          | 0.26      | 1          | 0.17      | 1          | 0.30      | 1          |
| 0.19      | 1          | 0.16      | 1          | 0.17      | 1          | 0.33      | 1          | 0.33      | 1          | 0.25      | 1          |
| 6.53      | 1          | 0.21      | 1          | 5.04      | 1          | 3.89      | 1          | 0.18      | 1          | 0.27      | 1          |
| 0.25      | 1          | 0.14      | 1          | 0.25      | 1          | 0.26      | 1          | 0.19      | 1          | 0.27      | 1          |
| 0.17      | 1          | 0.14      | 1          | 0.24      | 1          | 0.06      | 1          | 0.17      | 1          | 0.30      | 1          |
| 0.18      | 1          | 0.24      | 1          | 0.21      | 1          | 0.13      | 1          | 0.19      | 1          | 0.30      | 1          |
| 0.14      | 1          | 0.37      | 1          | 0.21      | 1          | 0.21      | 1          | 0.19      | 1          | 0.28      | 1          |
| 0.27      | 1          | 0.18      | 1          | 0.28      | 1          | 0.30      | 1          | 0.30      | 1          | 3.85      | 1          |

| time<br>A | leuko<br>A | time<br>A | leuko<br>A | time<br>B | leuko<br>B | time<br>C | leuko<br>C | time<br>D | leuko<br>D | time<br>E | leuko<br>E |
|-----------|------------|-----------|------------|-----------|------------|-----------|------------|-----------|------------|-----------|------------|
| 0.22      | 1          | 0.20      | 1          | 0.22      | 1          | 0.21      | 1          | 0.60      | 1          | 0.31      | 1          |
| 0.18      | 1          | 0.18      | 1          | 0.21      | 1          | 0.19      | 1          | 1.71      | 1          | 0.31      | 1          |
| 0.19      | 1          | 0.21      | 1          | 0.20      | 1          | 0.27      | 1          | 0.21      | 1          | 0.29      | 1          |
| 3.21      | 1          | 0.19      | 1          | 0.21      | 1          | 0.19      | 1          | 0.18      | 1          | 0.28      | 1          |
| 0.24      | 1          | 21.59     | 1          | 0.26      | 1          | 0.25      | 1          | 0.47      | 1          | 0.30      | 1          |
| 0.18      | 1          | 0.26      | 1          | 0.22      | 1          | 0.67      | 1          | 0.39      | 1          | 0.34      | 1          |
| 0.19      | 1          | 0.18      | 1          | 0.19      | 1          | 0.22      | 1          | 0.34      | 1          | 0.31      | 1          |
| 0.18      | 1          | 0.21      | 1          | 6.52      | 1          | 0.21      | 1          | 0.35      | 1          | 0.32      | 1          |
| 0.19      | 1          | 0.19      | 1          | 0.25      | 1          | 0.23      | 1          | 0.22      | 1          | 0.25      | 1          |
| 0.18      | 1          | 0.19      | 1          | 0.21      | 1          | 0.24      | 1          | 0.18      | 1          | 5.11      | 1          |
| 0.21      | 1          | 0.20      | 1          | 0.27      | 1          | 0.22      | 1          | 12.05     | 1          | 0.27      | 1          |
| 0.55      | 1          | 0.15      | 1          | 0.24      | 1          | 0.21      | 1          | 0.24      | 1          | 0.29      | 1          |
| 0.20      | 1          | 0.21      | 1          | 0.17      | 1          | 0.54      | 1          | 0.40      | 1          | 0.27      | 1          |
| 2.45      | 1          | 0.20      | 1          | 0.25      | 1          | 6.49      | 1          | 0.22      | 1          | 0.26      | 1          |
| 0.32      | 1          | 0.22      | 1          | 0.22      | 1          | 0.21      | 1          | 0.23      | 1          | 0.29      | 1          |
| 0.18      | 1          | 6.48      | 1          | 0.21      | 1          | 0.40      | 1          | 0.22      | 1          | 0.44      | 1          |
| 0.39      | 1          | 0.31      | 1          | 0.20      | 1          | 0.20      | 1          | 0.19      | 1          | 21.20     | 1          |
| 0.20      | 1          | 0.14      | 1          | 4.58      | 1          | 0.21      | 1          | 9.69      | 1          | 0.27      | 1          |
| 0.17      | 1          | 0.31      | 1          | 0.31      | 1          | 0.33      | 1          | 0.21      | 1          | 0.29      | 1          |
| 0.21      | 1          | 0.21      | 1          | 0.24      | 1          | 0.19      | 1          | 0.21      | 1          | 0.31      | 1          |
| 0.32      | 1          | 0.22      | 1          | 0.22      | 1          | 0.25      | 1          | 0.21      | 1          | 0.34      | 1          |
| 0.22      | 1          | 0.19      | 1          | 0.23      | 1          | 0.24      | 1          | 0.41      | 1          | 0.32      | 1          |
| 0.29      | 1          | 0.20      | 1          | 0.49      | 1          | 0.23      | 1          | 0.19      | 1          | 0.30      | 1          |
| 2.08      | 0          | 0.20      | 1          | 0.28      | 1          | 0.22      | 1          | 0.26      | 1          | 3.84      | 1          |
| 1.10      | 1          | 0.15      | 1          | 0.24      | 1          | 0.22      | 1          | 0.18      | 1          | 0.27      | 1          |
| 0.20      | 1          | 0.32      | 1          | 4.44      | 1          | 4.19      | 1          | 0.29      | 1          | 0.25      | 1          |
| 0.52      | 1          | 0.22      | 1          | 0.28      | 1          | 0.21      | 1          | 0.27      | 1          | 3.21      | 1          |
| 4.24      | 1          | 0.20      | 1          | 0.24      | 1          | 0.22      | 1          | 0.26      | 1          | 0.26      | 1          |
| 0.20      | 1          | 0.23      | 1          | 0.22      | 1          | 0.25      | 1          | 0.25      | 1          | 0.27      | 1          |
| 0.19      | 1          | 0.21      | 1          | 0.32      | 1          | 0.21      | 1          | 0.29      | 1          | 0.27      | 1          |
| 0.16      | 1          | 0.22      | 1          | 0.25      | 1          | 0.49      | 1          | 0.24      | 1          | 0.30      | 1          |
| 0.18      | 1          | 0.19      | 1          | 0.23      | 1          | 0.21      | 1          | 0.21      | 1          | 0.27      | 1          |
| 0.20      | 1          | 0.18      | 1          | 0.23      | 1          | 0.19      | 1          | 0.21      | 1          | 0.28      | 1          |
| 0.18      | 1          | 4.58      | 1          | 0.49      | 1          | 0.20      | 1          | 0.20      | 1          | 0.29      | 1          |
| 0.16      | 1          | 0.29      | 1          | 0.27      | 1          | 0.20      | 1          | 0.18      | 1          | 0.28      | 1          |
| 0.18      | 1          | 0.21      | 1          | 0.23      | 1          | 0.27      | 1          | 0.21      | 1          | 0.28      | 1          |
| 0.18      | 1          | 0.11      | 1          | 26.14     | 1          | 0.08      | 1          | 14.04     | 1          | 5.40      | 1          |
| 0.18      | 1          | 0.30      | 1          | 0.28      | 1          | 0.10      | 1          | 0.20      | 1          | 0.28      | 1          |
| 0.18      | 1          | 0.20      | 1          | 0.27      | 1          | 7.64      | 1          | 0.20      | 1          | 0.30      | 1          |
| 0.18      | 1          | 0.22      | 1          | 0.23      | 1          | 0.21      | 1          | 0.16      | 1          | 0.29      | 1          |
| 0.20      | 1          | 0.19      | 1          | 0.86      | 1          | 0.33      | 1          | 0.20      | 1          | 0.29      | 1          |
| 0.18      | 1          | 0.20      | 1          | 0.26      | 1          | 0.38      | 1          | 0.17      | 1          | 0.11      | 1          |
| 3.17      | 1          | 0.20      | 1          | 0.25      | 1          | 0.21      | 1          | 0.20      | 1          | 0.15      | 1          |
| 0.24      | 1          | 0.22      | 1          | 0.20      | 1          | 0.09      | 1          | 0.19      | 1          | 0.28      | 1          |
| 0.20      | 1          | 0.21      | 1          | 0.37      | 1          | 1.14      | 1          | 0.19      | 1          | 0.31      | 1          |
| 0.20      | 1          | 0.23      | 1          | 0.24      | 1          | 0.09      | 1          | 0.16      | 1          | 0.25      | 1          |
| 0.19      | 1          | 0.23      | 1          | 0.40      | 1          | 0.10      | 1          | 0.19      | 1          | 5.69      | 1          |
| 0.17      | 1          | 4.38      | 1          | 0.22      | 1          | 0.22      | 1          | 0.18      | 1          | 0.28      | 1          |
| 0.19      | 1          | 0.25      | 1          | 0.22      | 1          | 0.58      | 1          | 0.20      | 1          | 0.26      | 1          |
| 0.21      | 1          | 0.19      | 1          | 10.72     | 1          | 0.22      | 1          | 0.19      | 1          | 0.27      | 1          |
| 0.17      | 1          | 0.19      | 1          | 0.30      | 1          | 0.20      | 1          | 0.16      | 1          | 0.33      | 1          |

| time<br>A | leuko<br>A | time<br>A | leuko<br>A | time<br>B | leuko<br>B | time<br>C | leuko<br>C | time<br>D | leuko<br>D | time<br>E | leuko<br>E |
|-----------|------------|-----------|------------|-----------|------------|-----------|------------|-----------|------------|-----------|------------|
| 0.17      | 1          | 0.18      | 1          | 0.24      | 1          | 0.19      | 1          | 0.19      | 1          | 0.35      | 1          |
| 0.17      | 1          | 0.18      | 1          | 0.22      | 1          | 0.20      | 1          | 0.19      | 1          | 0.29      | 1          |
| 0.18      | 1          | 0.19      | 1          | 0.20      | 1          | 0.31      | 1          | 0.19      | 1          | 8.22      | 1          |
| 0.18      | 1          | 0.17      | 1          | 0.36      | 1          | 0.10      | 1          | 0.18      | 1          | 0.30      | 1          |
| 0.19      | 1          | 0.16      | 1          | 0.23      | 1          | 0.15      | 1          | 0.16      | 1          | 0.15      | 1          |
| 0.19      | 1          | 0.18      | 1          | 0.23      | 1          | 0.10      | 1          | 0.18      | 1          | 0.16      | 1          |
| 0.18      | 1          | 0.20      | 1          | 1.17      | 1          | 1.74      | 1          | 0.14      | 1          | 0.31      | 1          |
| 0.19      | 1          | 0.18      | 1          | 0.28      | 1          | 2.62      | 1          | 6.02      | 1          | 0.32      | 1          |
| 0.19      | 1          | 0.18      | 1          | 0.30      | 1          | 0.23      | 1          | 0.19      | 1          | 0.29      | 1          |
| 0.18      | 1          | 0.17      | 1          | 0.21      | 1          | 0.20      | 1          | 0.15      | 1          | 0.29      | 1          |
| 3.34      | 1          | 0.17      | 1          | 0.21      | 1          | 0.20      | 1          | 0.19      | 1          | 0.13      | 1          |
| 0.45      | 1          | 0.28      | 1          | 6.63      | 1          | 0.23      | 1          | 0.18      | 1          | 0.16      | 1          |
| 0.23      | 1          | 8.18      | 1          | 0.26      | 1          | 0.21      | 1          | 0.20      | 1          | 0.33      | 1          |
| 0.17      | 1          | 0.26      | 1          | 0.24      | 1          | 0.22      | 1          | 0.21      | 1          | 0.28      | 1          |
| 0.19      | 1          | 0.20      | 1          | 0.22      | 1          | 0.20      | 1          | 0.19      | 1          | 0.11      | 1          |
| 0.19      | 1          | 0.13      | 1          | 0.20      | 1          | 0.22      | 1          | 0.20      | 1          | 0.15      | 1          |
| 0.17      | 1          | 0.32      | 1          | 0.27      | 1          | 0.46      | 1          | 0.29      | 1          | 0.27      | 1          |
| 0.67      | 1          | 0.22      | 1          | 0.23      | 1          | 0.09      | 1          | 0.21      | 1          | 0.09      | 1          |
| 1.24      | 1          | 0.21      | 1          | 0.22      | 1          | 0.11      | 1          | 0.19      | 1          | 0.24      | 1          |
| 0.24      | 1          | 0.21      | 1          | 0.20      | 1          | 0.11      | 1          | 0.16      | 1          | 0.31      | 1          |
| 0.19      | 1          | 0.20      | 1          | 0.20      | 1          | 0.15      | 1          | 0.19      | 1          | 0.29      | 1          |
| 5.59      | 1          | 0.20      | 1          | 0.22      | 1          | 0.24      | 1          | 0.22      | 1          | 3.88      | 1          |
| 0.23      | 1          | 0.19      | 1          | 0.20      | 1          | 0.04      | 1          | 1.98      | 1          | 0.27      | 1          |
| 0.14      | 1          | 0.19      | 1          | 0.22      | 1          | 0.14      | 1          | 0.18      | 1          | 0.37      | 1          |
| 0.16      | 1          | 0.21      | 1          | 0.25      | 1          | 0.27      | 1          | 0.16      | 1          | 0.31      | 1          |
| 0.17      | 1          | 0.36      | 1          | 0.22      | 1          | 0.23      | 1          | 0.28      | 1          | 0.32      | 1          |
| 0.17      | 1          | 0.34      | 1          | 0.19      | 1          | 0.09      | 1          | 0.20      | 1          | 0.32      | 1          |
| 0.19      | 1          | 0.20      | 1          | 0.21      | 1          | 0.11      | 1          | 0.16      | 1          | 0.30      | 1          |
| 0.17      | 1          | 0.20      | 1          | 3.83      | 1          | 0.29      | 1          | 0.28      | 1          | 0.30      | 1          |
| 0.17      | 1          | 0.22      | 1          | 0.27      | 1          | 0.09      | 1          | 0.19      | 1          | 0.31      | 1          |
| 0.21      | 1          | 6.69      | 1          | 0.24      | 1          | 10.39     | 1          | 0.17      | 1          | 0.29      | 1          |
| 0.21      | 1          | 0.28      | 1          | 0.52      | 1          | 0.20      | 1          | 0.25      | 1          | 3.09      | 1          |
| 0.21      | 1          | 0.19      | 1          | 0.26      | 1          | 0.20      | 1          | 0.22      | 1          | 0.27      | 1          |
| 0.22      | 1          | 0.22      | 1          | 0.23      | 1          | 0.21      | 1          | 0.18      | 1          | 0.27      | 1          |
| 0.35      | 1          | 0.21      | 1          | 0.38      | 1          | 0.30      | 1          | 0.20      | 1          | 0.10      | 1          |
| 0.23      | 1          | 0.18      | 1          | 0.26      | 1          | 0.15      | 1          | 0.17      | 1          | 0.16      | 1          |
| 2.12      | 1          | 0.27      | 1          | 0.25      | 1          | 0.09      | 1          | 0.16      | 1          | 0.26      | 1          |
| 0.21      | 1          | 0.22      | 1          | 0.24      | 1          | 0.10      | 1          | 0.17      | 1          | 0.28      | 1          |
| 0.20      | 1          | 0.21      | 1          | 0.22      | 1          | 0.19      | 1          | 0.16      | 1          | 0.26      | 1          |
| 0.20      | 1          | 0.20      | 1          | 0.22      | 1          | 0.19      | 1          | 2.30      | 1          | 0.27      | 1          |
| 0.20      | 1          | 0.21      | 1          | 0.31      | 1          | 0.20      | 1          | 0.18      | 1          | 0.26      | 1          |
| 0.19      | 1          | 0.22      | 1          | 0.24      | 1          | 0.20      | 1          | 0.19      | 1          | 0.36      | 1          |
| 0.19      | 1          | 0.19      | 1          | 0.22      | 1          | 0.22      | 1          | 0.18      | 1          | 7.94      | 1          |
| 0.18      | 1          | 0.23      | 1          | 0.23      | 1          | 0.25      | 1          | 0.17      | 1          | 0.30      | 1          |
| 0.20      | 1          | 0.23      | 1          | 0.27      | 1          | 0.10      | 1          | 0.19      | 1          | 0.46      | 1          |
| 0.18      | 1          | 0.21      | 1          | 0.21      | 1          | 0.01      | 1          | 0.20      | 1          | 6.15      | 1          |
| 0.17      | 1          | 0.20      | 1          | 4.21      | 1          | 0.09      | 1          | 0.21      | 1          | 0.28      | 1          |
| 0.18      | 1          | 0.23      | 1          | 0.27      | 1          | 0.21      | 1          | 0.18      | 1          | 0.26      | 1          |
| 0.20      | 1          | 0.26      | 1          | 0.19      | 1          | 0.22      | 1          | 0.19      | 1          | 0.26      | 1          |
| 2.80      | 1          | 0.31      | 1          | 0.74      | 1          | 0.24      | 1          | 0.17      | 1          | 0.25      | 1          |
| 0.20      | 1          | 3.22      | 1          | 0.25      | 1          | 0.21      | 1          | 8.30      | 1          | 0.24      | 1          |

| time<br>A | leuko<br>A | time<br>A | leuko<br>A | time<br>B | leuko<br>B | time<br>C | leuko<br>C | time<br>D | leuko<br>D | time<br>E | leuko<br>E |
|-----------|------------|-----------|------------|-----------|------------|-----------|------------|-----------|------------|-----------|------------|
| 0.20      | 1          | 0.21      | 1          | 0.23      | 1          | 0.11      | 1          | 0.22      | 1          | 5.63      | 1          |
| 0.17      | 1          | 0.18      | 1          | 0.31      | 1          | 0.19      | 1          | 0.21      | 1          | 0.26      | 1          |
| 0.18      | 1          | 0.18      | 1          | 0.23      | 1          | 0.10      | 1          | 1.20      | 1          | 0.32      | 1          |
| 0.18      | 1          | 0.20      | 1          | 0.20      | 1          | 4.25      | 1          | 0.21      | 1          | 0.28      | 1          |
| 0.18      | 1          | 0.20      | 1          | 8.73      | 1          | 0.06      | 1          | 0.23      | 1          | 0.27      | 1          |
| 0.18      | 1          | 0.17      | 1          | 0.25      | 1          | 0.13      | 1          | 0.20      | 1          | 0.29      | 1          |
| 0.20      | 1          | 0.17      | 1          | 0.22      | 1          | 0.21      | 1          | 0.31      | 1          | 0.25      | 1          |
| 0.19      | 1          | 0.20      | 1          | 0.22      | 1          | 0.07      | 1          | 0.18      | 1          | 0.09      | 1          |
| 0.19      | 1          | 0.18      | 1          | 0.21      | 1          | 0.11      | 1          | 0.23      | 1          | 0.14      | 1          |
| 0.19      | 1          | 0.22      | 1          | 0.33      | 1          | 0.05      | 1          | 0.32      | 1          | 0.26      | 1          |
| 0.19      | 1          | 0.10      | 1          | 0.22      | 1          | 0.13      | 1          | 0.99      | 1          | 3.32      | 1          |
| 0.23      | 1          | 0.25      | 1          | 0.47      | 1          | 0.22      | 1          | 0.20      | 1          | 0.32      | 1          |
| 0.19      | 1          | 4.83      | 1          | 0.36      | 1          | 0.18      | 1          | 0.36      | 1          | 0.27      | 1          |
| 0.20      | 1          | 0.25      | 1          | 0.22      | 1          | 0.09      | 1          | 0.21      | 1          | 0.09      | 1          |
| 0.20      | 1          | 0.40      | 1          | 0.21      | 1          | 0.13      | 1          | 4.33      | 1          | 0.18      | 1          |
| 3.92      | 1          | 0.20      | 1          | 0.21      | 1          | 0.20      | 1          | 0.25      | 1          | 0.01      | 1          |
| 0.23      | 1          | 0.18      | 1          | 11.27     | 1          | 0.09      | 1          | 0.30      | 1          | 0.24      | 1          |
| 0.18      | 1          | 0.21      | 1          | 0.24      | 1          | 0.12      | 1          | 0.53      | 1          | 0.26      | 1          |
| 0.20      | 1          | 0.20      | 1          | 0.20      | 1          | 0.08      | 1          | 0.65      | 1          | 0.25      | 1          |
| 0.19      | 1          | 0.21      | 1          | 0.26      | 1          | 0.12      | 1          | 0.27      | 1          | 0.29      | 1          |
| 0.19      | 1          | 0.19      | 1          | 0.22      | 1          | 0.09      | 1          | 0.20      | 1          | 0.29      | 1          |
| 0.18      | 1          | 0.20      | 1          | 0.19      | 1          | 0.11      | 1          | 0.24      | 1          | 0.28      | 1          |
| 0.19      | 1          | 0.20      | 1          | 0.19      | 1          | 0.09      | 1          | 0.34      | 1          | 0.01      | 1          |
| 0.18      | 1          | 0.19      | 1          | 0.25      | 1          | 0.11      | 1          | 0.25      | 1          | 0.22      | 1          |
| 0.20      | 1          | 0.20      | 1          | 0.20      | 1          | 0.31      | 1          | 0.21      | 1          | 4.01      | 1          |
| 0.20      | 1          | 0.20      | 1          | 0.28      | 1          | 0.24      | 1          | 2.86      | 1          | 0.26      | 1          |
| 0.20      | 1          | 0.20      | 1          | 0.22      | 1          | 0.22      | 1          | 0.26      | 1          | 0.26      | 1          |
| 0.31      | 1          | 0.20      | 1          | 0.19      | 1          | 0.25      | 1          | 0.32      | 1          | 0.24      | 1          |
| 0.22      | 1          | 0.18      | 1          | 0.57      | 1          | 0.09      | 1          | 9.20      | 1          | 0.10      | 1          |
| 0.18      | 1          | 0.22      | 1          | 0.26      | 1          | 0.11      | 1          | 0.22      | 1          | 2.77      | 1          |
| 0.19      | 1          | 2.85      | 1          | 0.23      | 1          | 0.26      | 1          | 0.18      | 1          | 0.33      | 1          |
| 0.18      | 1          | 0.28      | 1          | 0.21      | 1          | 0.27      | 1          | 0.18      | 1          | 0.30      | 1          |
| 0.19      | 1          | 0.24      | 1          | 0.26      | 1          | 0.27      | 1          | 0.25      | 1          | 0.28      | 1          |
| 0.20      | 1          | 0.22      | 1          | 0.20      | 1          | 0.25      | 1          | 0.37      | 1          | 0.30      | 1          |
| 0.19      | 1          | 0.21      | 1          | 0.20      | 1          | 0.32      | 1          | 0.59      | 1          | 0.27      | 1          |
| 0.17      | 1          | 0.19      | 1          | 0.22      | 1          | 4.57      | 1          | 0.18      | 1          | 0.27      | 1          |
| 0.22      | 1          | 0.23      | 1          | 0.19      | 1          | 0.09      | 1          | 0.18      | 1          | 0.27      | 1          |
| 2.95      | 1          | 0.21      | 1          | 8.20      | 1          | 0.11      | 1          | 0.25      | 1          | 2.71      | 1          |
| 0.24      | 1          | 6.56      | 1          | 0.27      | 1          | 0.06      | 1          | 0.20      | 1          | 0.25      | 1          |
| 0.19      | 1          | 0.24      | 1          | 0.24      | 1          | 0.11      | 1          | 0.18      | 1          | 0.25      | 1          |
| 0.18      | 1          | 0.23      | 1          | 0.21      | 1          | 0.21      | 1          | 0.24      | 1          | 0.27      | 1          |
| 0.17      | 1          | 0.19      | 1          | 0.28      | 1          | 0.20      | 1          | 0.21      | 1          | 0.25      | 1          |
| 0.17      | 1          | 0.19      | 1          | 0.21      | 1          | 0.48      | 1          | 0.23      | 1          | 0.25      | 1          |
| 0.17      | 1          | 0.18      | 1          | 0.22      | 1          | 0.23      | 1          | 0.29      | 1          | 0.23      | 1          |
| 0.19      | 1          | 0.20      | 1          | 0.21      | 1          | 0.31      | 1          | 0.24      | 1          | 0.25      | 1          |
| 0.16      | 1          | 0.20      | 1          | 0.18      | 1          | 3.28      | 1          | 0.25      | 1          | 0.27      | 1          |
| 0.20      | 1          | 0.18      | 1          | 0.29      | 1          | 0.20      | 1          | 0.22      | 1          | 0.23      | 1          |
| 0.18      | 1          | 0.16      | 1          | 0.19      | 1          | 0.24      | 1          | 0.20      | 1          | 0.25      | 1          |
| 0.19      | 1          | 0.30      | 1          | 0.24      | 1          | 0.19      | 1          | 0.21      | 1          | 0.23      | 1          |
| 0.22      | 1          | 0.33      | 1          | 0.23      | 1          | 0.06      | 1          | 0.22      | 1          | 0.22      | 1          |
| 0.31      | 1          | 0.24      | 1          | 0.20      | 1          | 0.12      | 1          | 0.22      | 1          | 0.07      | 1          |

| time<br>A | leuko<br>A | time<br>A | leuko<br>A | time<br>B | leuko<br>B | time<br>C | leuko<br>C | time<br>D | leuko<br>D | time<br>E | leuko<br>E |
|-----------|------------|-----------|------------|-----------|------------|-----------|------------|-----------|------------|-----------|------------|
| 0.23      | 1          | 0.20      | 1          | 0.21      | 1          | 0.20      | 1          | 0.26      | 1          | 2.77      | 1          |
| 2.41      | 1          | 0.21      | 1          | 0.20      | 1          | 0.06      | 1          | 0.33      | 1          | 0.26      | 1          |
| 0.25      | 1          | 7.56      | 1          | 0.25      | 1          | 0.13      | 1          | 0.22      | 1          | 0.28      | 1          |
| 0.19      | 1          | 0.22      | 1          | 0.23      | 1          | 2.44      | 1          | 0.23      | 1          | 0.27      | 1          |
| 0.21      | 1          | 0.22      | 1          | 0.20      | 1          | 0.10      | 1          | 0.35      | 1          | 0.27      | 1          |
| 0.16      | 1          | 0.20      | 1          | 0.21      | 1          | 0.10      | 1          | 0.36      | 1          | 0.11      | 1          |
| 0.20      | 1          | 0.19      | 1          | 0.19      | 1          | 0.08      | 1          | 0.23      | 1          | 0.15      | 1          |
| 0.20      | 1          | 0.20      | 1          | 0.20      | 1          | 0.11      | 1          | 0.49      | 1          | 0.26      | 1          |
| 0.19      | 1          | 0.21      | 1          | 4.47      | 1          | 0.29      | 1          | 0.23      | 1          | 0.01      | 1          |
| 0.19      | 1          | 0.22      | 1          | 0.27      | 1          | 0.39      | 1          | 0.25      | 1          | 0.26      | 1          |
| 0.18      | 1          | 0.17      | 1          | 0.24      | 1          | 0.21      | 1          | 0.25      | 1          | 0.55      | 1          |
| 0.22      | 1          | 0.20      | 1          | 0.22      | 1          | 0.27      | 1          | 0.35      | 1          | 3.22      | 1          |
| 0.18      | 1          | 0.19      | 1          | 0.28      | 1          | 4.92      | 1          | 0.54      | 1          | 0.21      | 1          |
| 0.19      | 1          | 0.20      | 1          | 0.22      | 1          | 0.29      | 1          | 0.24      | 1          | 0.32      | 1          |
| 0.22      | 1          | 0.21      | 1          | 0.23      | 1          | 0.24      | 1          | 0.25      | 1          | 0.71      | 1          |
| 0.19      | 1          | 0.18      | 1          | 0.22      | 1          | 0.20      | 1          | 0.25      | 1          | 0.38      | 1          |
| 0.19      | 1          | 0.20      | 1          | 0.74      | 1          | 1.65      | 1          | 0.25      | 1          | 0.29      | 1          |
| 0.19      | 1          | 0.22      | 1          | 0.28      | 1          | 0.27      | 1          | 0.19      | 1          | 0.27      | 1          |
| 0.20      | 1          | 2.06      | 1          | 0.23      | 1          | 0.23      | 1          | 0.30      | 1          | 0.26      | 1          |
| 0.23      | 1          | 0.22      | 1          | 0.24      | 1          | 0.21      | 1          | 12.42     | 1          | 0.28      | 1          |
| 3.98      | 1          | 0.17      | 1          | 0.20      | 1          | 0.21      | 1          | 0.24      | 1          | 0.25      | 1          |
| 0.25      | 1          | 0.18      | 1          | 0.26      | 1          | 0.25      | 1          | 0.28      | 1          | 0.10      | 1          |
| 0.21      | 1          | 0.20      | 1          | 0.22      | 1          | 0.17      | 1          | 0.40      | 1          | 3.23      | 1          |
| 0.19      | 1          | 0.20      | 1          | 0.21      | 1          | 0.17      | 1          | 0.20      | 1          | 0.23      | 1          |
| 0.17      | 1          | 0.20      | 1          | 0.20      | 1          | 0.33      | 1          | 0.83      | 1          | 0.25      | 1          |
| 0.17      | 1          | 0.20      | 1          | 0.19      | 1          | 0.25      | 1          | 0.18      | 1          | 0.27      | 1          |
| 0.19      | 1          | 0.22      | 1          | 0.26      | 1          | 0.07      | 1          | 0.30      | 1          | 0.27      | 1          |
| 0.19      | 1          | 0.19      | 1          | 0.18      | 1          | 0.10      | 1          | 0.46      | 1          | 0.10      | 1          |
| 0.19      | 1          | 0.20      | 1          | 0.29      | 1          | 0.23      | 1          | 0.26      | 1          | 0.14      | 1          |
| 0.24      | 1          | 0.20      | 1          | 4.90      | 1          | 0.19      | 1          | 0.42      | 1          | 0.25      | 1          |
| 0.19      | 1          | 0.19      | 1          | 0.27      | 1          | 0.06      | 1          | 0.29      | 1          | 0.10      | 1          |
| 0.18      | 1          | 0.20      | 1          | 0.22      | 1          | 0.13      | 1          | 0.26      | 1          | 0.16      | 1          |
| 0.17      | 1          | 0.19      | 1          | 0.48      | 1          | 0.26      | 1          | 0.23      | 1          | 0.10      | 1          |
| 0.34      | 1          | 0.20      | 1          | 0.24      | 1          | 0.25      | 1          | 0.30      | 1          | 0.17      | 1          |
| 2.79      | 1          | 2.20      | 1          | 0.22      | 1          | 4.03      | 1          | 0.32      | 1          | 0.26      | 1          |
| 0.19      | 1          | 0.25      | 1          | 0.23      | 1          | 0.09      | 1          | 0.27      | 1          | 0.24      | 1          |
| 0.20      | 1          | 0.22      | 1          | 0.21      | 1          | 0.11      | 1          | 0.24      | 1          | 0.09      | 1          |
| 0.14      | 1          | 0.20      | 1          | 0.27      | 1          | 0.06      | 1          | 0.30      | 1          | 2.11      | 1          |
| 0.16      | 1          | 0.21      | 1          | 0.21      | 1          | 0.14      | 1          | 0.23      | 1          | 0.25      | 1          |
| 0.19      | 1          | 0.20      | 1          | 0.91      | 1          | 0.09      | 1          | 0.23      | 1          | 0.29      | 1          |
| 0.18      | 1          | 0.21      | 1          | 0.26      | 1          | 0.12      | 1          | 0.23      | 1          | 0.25      | 1          |
| 0.18      | 1          | 0.21      | 1          | 0.24      | 1          | 0.09      | 1          | 0.23      | 1          | 0.25      | 1          |
| 0.18      | 1          | 0.21      | 1          | 0.23      | 1          | 0.12      | 1          | 0.25      | 1          | 0.27      | 1          |
| 0.19      | 1          | 0.17      | 1          | 0.22      | 1          | 0.21      | 1          | 0.23      | 1          | 0.25      | 1          |
| 0.15      | 1          | 0.21      | 1          | 0.26      | 1          | 0.52      | 1          | 0.26      | 1          | 0.26      | 1          |
| 0.21      | 1          | 0.21      | 1          | 0.20      | 1          | 2.57      | 1          | 0.56      | 1          | 0.26      | 1          |
| 0.16      | 1          | 0.33      | 1          | 2.86      | 1          | 0.20      | 1          | 9.96      | 1          | 0.28      | 1          |
| 0.16      | 1          | 0.23      | 1          | 0.27      | 1          | 0.22      | 1          | 0.17      | 1          | 0.29      | 1          |
| 0.35      | 1          | 3.18      | 1          | 0.25      | 1          | 0.08      | 1          | 0.19      | 1          | 0.26      | 1          |
| 0.17      | 1          | 0.23      | 1          | 0.24      | 1          | 0.11      | 1          | 0.25      | 1          | 0.24      | 1          |
| 0.19      | 1          | 0.20      | 1          | 0.34      | 1          | 0.07      | 1          | 0.18      | 1          | 2.55      | 1          |



| time<br>A | leuko<br>A | time<br>A | leuko<br>A | time<br>B | leuko<br>B | time<br>C | leuko<br>C | time<br>D | leuko<br>D | time<br>E | leuko<br>E |
|-----------|------------|-----------|------------|-----------|------------|-----------|------------|-----------|------------|-----------|------------|
| 0.19      | 1          | 0.18      | 1          | 0.24      | 1          | 0.95      | 1          | 0.25      | 1          | 0.25      | 1          |
| 4.08      | 1          | 0.20      | 1          | 0.25      | 1          | 0.08      | 1          | 0.19      | 1          | 0.29      | 1          |
| 0.19      | 1          | 0.18      | 1          | 0.21      | 1          | 0.50      | 1          | 0.20      | 1          | 0.28      | 1          |
| 0.19      | 1          | 0.21      | 1          | 0.31      | 1          | 0.08      | 1          | 0.19      | 1          | 0.30      | 1          |
| 0.19      | 1          | 0.21      | 1          | 0.27      | 1          | 0.14      | 1          | 0.17      | 1          | 0.29      | 1          |
| 0.17      | 1          | 0.21      | 1          | 0.20      | 1          | 0.08      | 1          | 0.19      | 1          | 0.27      | 1          |
| 0.18      | 1          | 0.23      | 1          | 0.27      | 1          | 0.13      | 1          | 0.18      | 1          | 0.28      | 1          |
| 0.18      | 1          | 0.20      | 1          | 0.24      | 1          | 0.23      | 1          | 0.20      | 1          | 0.26      | 1          |
| 0.18      | 1          | 0.21      | 1          | 0.20      | 1          | 0.23      | 1          | 0.18      | 1          | 0.27      | 1          |
| 0.19      | 1          | 0.19      | 1          | 7.43      | 1          | 0.07      | 1          | 0.16      | 1          | 0.01      | 1          |
| 0.18      | 1          | 0.22      | 1          | 0.30      | 1          | 0.13      | 1          | 0.19      | 1          | 0.25      | 1          |
| 3.83      | 1          | 0.19      | 1          | 1.00      | 1          | 1.72      | 1          | 0.17      | 1          | 0.34      | 1          |
| 0.22      | 1          | 0.19      | 1          | 0.31      | 1          | 0.23      | 1          | 0.20      | 1          | 0.25      | 1          |
| 0.22      | 1          | 0.21      | 1          | 0.26      | 1          | 0.22      | 1          | 0.20      | 1          | 3.00      | 1          |
| 0.19      | 1          | 6.65      | 1          | 0.22      | 1          | 0.19      | 1          | 0.19      | 1          | 0.24      | 1          |
| 0.21      | 1          | 0.24      | 1          | 5.49      | 1          | 0.23      | 1          | 0.20      | 1          | 0.28      | 1          |
| 0.18      | 1          | 0.19      | 1          | 0.26      | 1          | 0.06      | 1          | 0.18      | 1          | 0.29      | 1          |
| 0.17      | 1          | 0.20      | 1          | 0.20      | 1          | 0.12      | 1          | 0.18      | 1          | 0.29      | 1          |
| 0.18      | 1          | 0.17      | 1          | 0.80      | 1          | 0.20      | 1          | 0.34      | 1          | 0.27      | 1          |
| 0.19      | 1          | 0.21      | 1          | 0.26      | 1          | 0.45      | 1          | 0.21      | 1          | 0.27      | 1          |
| 0.20      | 1          | 0.19      | 1          | 0.22      | 1          | 0.21      | 1          | 0.18      | 1          | 0.11      | 1          |
| 0.18      | 1          | 0.20      | 1          | 0.21      | 1          | 0.19      | 1          | 0.20      | 1          | 0.17      | 1          |
| 0.17      | 1          | 0.19      | 1          | 0.23      | 1          | 0.07      | 1          | 0.19      | 1          | 0.29      | 1          |
| 0.19      | 1          | 0.22      | 1          | 0.28      | 1          | 0.12      | 1          | 0.22      | 1          | 0.26      | 1          |
| 0.19      | 1          | 0.20      | 1          | 0.20      | 1          | 0.50      | 1          | 0.19      | 1          | 0.10      | 1          |
| 0.18      | 1          | 0.20      | 1          | 0.25      | 1          | 0.22      | 1          | 0.18      | 1          | 0.13      | 1          |
| 0.20      | 1          | 3.22      | 1          | 0.20      | 1          | 0.23      | 1          | 3.92      | 1          | 3.37      | 1          |
| 0.19      | 1          | 0.23      | 1          | 7.88      | 1          | 3.40      | 1          | 0.22      | 1          | 0.29      | 1          |
| 0.20      | 1          | 0.18      | 1          | 0.26      | 1          | 0.05      | 1          | 0.22      | 1          | 0.28      | 1          |
| 0.20      | 1          | 0.20      | 1          | 0.24      | 1          | 0.12      | 1          | 0.19      | 1          | 0.27      | 1          |
| 0.19      | 1          | 0.17      | 1          | 0.22      | 1          | 0.26      | 1          | 0.20      | 1          | 2.48      | 1          |
| 4.17      | 1          | 0.23      | 1          | 0.20      | 1          | 0.21      | 1          | 0.19      | 1          | 0.25      | 1          |
| 0.20      | 1          | 0.31      | 1          | 0.31      | 1          | 0.06      | 1          | 0.21      | 1          | 0.28      | 1          |
| 0.17      | 1          | 0.19      | 1          | 0.23      | 1          | 0.14      | 1          | 0.21      | 1          | 0.25      | 1          |
| 0.18      | 1          | 0.23      | 1          | 0.20      | 1          | 0.06      | 1          | 0.20      | 1          | 0.28      | 1          |
| 0.16      | 1          | 0.19      | 1          | 0.19      | 1          | 0.51      | 1          | 0.19      | 1          | 0.26      | 1          |
| 0.18      | 1          | 0.19      | 1          | 0.33      | 1          | 0.25      | 1          | 0.20      | 1          | 0.25      | 1          |
| 0.16      | 1          | 0.20      | 1          | 0.23      | 1          | 0.09      | 1          | 0.21      | 1          | 0.26      | 1          |
| 0.18      | 1          | 0.19      | 1          | 0.19      | 1          | 0.15      | 1          | 0.21      | 1          | 1.84      | 1          |
| 0.17      | 1          | 0.18      | 1          | 0.21      | 1          | 0.06      | 1          | 0.20      | 1          | 0.25      | 1          |
| 0.19      | 1          | 0.19      | 1          | 0.19      | 1          | 0.14      | 1          | 0.21      | 1          | 0.29      | 1          |
| 0.18      | 1          | 0.21      | 1          | 4.22      | 1          | 0.50      | 1          | 0.20      | 1          | 0.25      | 1          |
| 0.18      | 1          | 0.18      | 1          | 0.25      | 1          | 0.36      | 1          | 0.21      | 1          | 0.26      | 1          |
| 0.18      | 1          | 0.21      | 1          | 0.23      | 1          | 0.08      | 1          | 0.04      | 1          | 0.30      | 1          |
| 0.18      | 1          | 0.21      | 1          | 0.43      | 1          | 3.36      | 1          | 0.13      | 1          | 0.27      | 1          |
| 3.53      | 1          | 3.86      | 1          | 0.24      | 1          | 0.21      | 1          | 0.23      | 1          | 0.28      | 1          |
| 0.17      | 1          | 0.20      | 1          | 0.21      | 1          | 0.08      | 1          | 0.21      | 1          | 0.27      | 1          |
| 0.27      | 1          | 0.18      | 1          | 0.41      | 1          | 0.11      | 1          | 0.24      | 1          | 0.24      | 1          |
| 0.20      | 1          | 0.19      | 1          | 0.25      | 1          | 0.06      | 1          | 0.22      | 1          | 0.22      | 1          |
| 0.19      | 1          | 0.14      | 1          | 0.23      | 1          | 0.22      | 1          | 0.21      | 1          | 7.19      | 1          |
| 0.20      | 1          | 0.25      | 1          | 0.19      | 1          | 0.25      | 1          | 0.17      | 1          | 0.22      | 1          |

| time<br>A | leuko<br>A | time<br>A | leuko<br>A | time<br>B | leuko<br>B | time<br>C | leuko<br>C | time<br>D | leuko<br>D | time<br>E | leuko<br>E |
|-----------|------------|-----------|------------|-----------|------------|-----------|------------|-----------|------------|-----------|------------|
| 0.17      | 1          | 0.19      | 1          | 0.26      | 1          | 0.30      | 1          | 0.21      | 1          | 0.26      | 1          |
| 0.21      | 1          | 0.21      | 1          | 0.21      | 1          | 0.94      | 1          | 0.21      | 1          | 0.23      | 1          |
| 0.17      | 1          | 0.19      | 1          | 0.19      | 1          | 0.29      | 1          | 0.24      | 1          | 0.25      | 1          |
| 0.19      | 1          | 0.20      | 1          | 0.22      | 1          | 0.11      | 1          | 0.24      | 1          | 0.27      | 1          |
| 0.20      | 1          | 0.19      | 1          | 4.72      | 1          | 0.15      | 1          | 0.27      | 1          | 0.25      | 1          |
| 0.20      | 1          | 0.19      | 1          | 0.28      | 1          | 0.36      | 1          | 0.28      | 1          | 0.25      | 1          |
| 0.19      | 1          | 0.20      | 1          | 0.23      | 1          | 0.11      | 1          | 2.80      | 1          | 0.26      | 1          |
| 0.21      | 1          | 0.19      | 1          | 0.29      | 1          | 0.01      | 1          | 0.43      | 1          | 0.25      | 1          |
| 0.20      | 1          | 0.20      | 1          | 0.23      | 1          | 8.13      | 1          | 0.36      | 1          | 4.37      | 1          |
| 0.18      | 1          | 0.19      | 1          | 0.21      | 1          | 0.22      | 1          | 0.43      | 1          | 0.44      | 1          |
| 0.20      | 1          | 0.21      | 1          | 0.28      | 1          | 0.08      | 1          | 0.45      | 1          | 0.26      | 1          |
| 0.21      | 1          | 0.19      | 1          | 0.23      | 1          | 0.13      | 1          | 8.85      | 1          | 0.28      | 1          |
| 0.21      | 1          | 0.20      | 1          | 0.22      | 1          | 0.09      | 1          | 5.83      | 1          | 0.24      | 1          |
| 5.17      | 1          | 0.16      | 1          | 0.21      | 1          | 0.13      | 1          | 0.22      | 1          | 0.27      | 1          |
| 0.22      | 1          | 3.13      | 1          | 0.26      | 1          | 0.11      | 1          | 0.20      | 1          | 0.31      | 1          |
| 0.18      | 1          | 0.26      | 1          | 0.22      | 1          | 0.12      | 1          | 0.20      | 1          | 0.25      | 1          |
| 0.19      | 1          | 0.20      | 1          | 0.19      | 1          | 0.08      | 1          | 0.18      | 1          | 0.28      | 1          |
| 0.20      | 1          | 0.21      | 1          | 0.22      | 1          | 0.10      | 1          | 0.18      | 1          | 0.28      | 1          |
| 0.20      | 1          | 0.19      | 1          | 0.18      | 1          | 0.09      | 1          | 0.26      | 1          | 0.24      | 1          |
| 0.18      | 1          | 0.21      | 1          | 5.43      | 1          | 0.11      | 1          | 0.19      | 1          | 2.99      | 1          |
| 0.36      | 1          | 0.19      | 1          | 0.25      | 1          | 0.21      | 1          | 0.20      | 1          | 0.28      | 1          |
| 0.20      | 1          | 0.23      | 1          | 0.29      | 1          | 0.07      | 1          | 0.18      | 1          | 0.28      | 1          |
| 0.18      | 1          | 0.19      | 1          | 0.23      | 1          | 0.11      | 1          | 0.19      | 1          | 0.30      | 1          |
| 0.18      | 1          | 0.20      | 1          | 0.20      | 1          | 0.08      | 1          | 0.18      | 1          | 0.26      | 1          |
| 2.63      | 1          | 0.20      | 1          | 0.21      | 1          | 0.69      | 1          | 0.18      | 1          | 0.28      | 1          |
| 0.21      | 1          | 0.22      | 1          | 0.29      | 1          | 4.81      | 1          | 0.19      | 1          | 0.27      | 1          |
| 0.19      | 1          | 2.49      | 1          | 0.24      | 1          | 0.22      | 1          | 0.19      | 1          | 2.57      | 1          |
| 0.19      | 1          | 0.25      | 1          | 0.33      | 1          | 0.25      | 1          | 0.16      | 1          | 0.23      | 1          |
| 0.19      | 1          | 0.19      | 1          | 0.23      | 1          | 0.20      | 1          | 0.16      | 1          | 0.28      | 1          |
| 0.17      | 1          | 0.20      | 1          | 0.20      | 1          | 0.20      | 1          | 0.17      | 1          | 0.45      | 1          |
| 0.19      | 1          | 0.20      | 1          | 0.19      | 1          | 0.20      | 1          | 0.21      | 1          | 0.34      | 1          |
| 0.18      | 1          | 0.19      | 1          | 0.27      | 1          | 0.22      | 1          | 0.19      | 1          | 0.26      | 1          |
| 0.18      | 1          | 0.19      | 1          | 0.22      | 1          | 0.21      | 1          | 0.20      | 1          | 0.25      | 1          |
| 0.20      | 1          | 0.19      | 1          | 0.22      | 1          | 0.09      | 1          | 0.18      | 1          | 0.27      | 1          |
| 0.19      | 1          | 0.19      | 1          | 0.22      | 1          | 0.11      | 1          | 0.20      | 1          | 0.27      | 1          |
| 0.19      | 1          | 0.21      | 1          | 0.22      | 1          | 0.07      | 1          | 0.21      | 1          | 3.18      | 1          |
| 0.19      | 1          | 0.38      | 1          | 0.25      | 1          | 0.14      | 1          | 0.20      | 1          | 0.24      | 1          |
| 0.21      | 1          | 0.22      | 1          | 0.22      | 1          | 0.24      | 1          | 0.26      | 1          | 0.44      | 1          |
| 0.19      | 1          | 0.18      | 1          | 0.21      | 1          | 0.07      | 1          | 0.20      | 1          | 0.27      | 1          |
| 0.17      | 1          | 0.19      | 1          | 0.23      | 1          | 0.10      | 1          | 0.25      | 1          | 0.26      | 1          |
| 1.94      | 1          | 0.20      | 1          | 0.20      | 1          | 0.24      | 1          | 0.21      | 1          | 0.27      | 1          |
| 0.23      | 1          | 0.18      | 1          | 0.23      | 1          | 0.22      | 1          | 0.34      | 1          | 0.27      | 1          |
| 0.19      | 1          | 1.96      | 1          | 0.21      | 1          | 3.77      | 1          | 0.20      | 1          | 0.26      | 1          |
| 0.18      | 1          | 0.31      | 1          | 10.74     | 1          | 3.95      | 1          | 0.33      | 1          | 0.25      | 1          |
| 0.20      | 1          | 0.22      | 1          | 0.26      | 1          | 0.22      | 1          | 5.17      | 1          | 0.25      | 1          |
| 0.19      | 1          | 0.19      | 1          | 0.21      | 1          | 0.18      | 1          | 0.25      | 1          | 3.07      | 1          |
| 0.18      | 1          | 0.22      | 1          | 0.82      | 1          | 0.39      | 1          | 0.19      | 1          | 0.25      | 1          |
| 0.20      | 1          | 0.20      | 1          | 0.25      | 1          | 0.09      | 1          | 0.61      | 1          | 0.26      | 1          |
| 0.19      | 1          | 0.26      | 1          | 0.21      | 1          | 0.11      | 1          | 0.22      | 1          | 0.39      | 1          |
| 0.20      | 1          | 0.20      | 1          | 0.20      | 1          | 0.07      | 1          | 0.52      | 1          | 0.24      | 1          |
| 0.22      | 1          | 0.20      | 1          | 0.42      | 1          | 0.14      | 1          | 0.36      | 1          | 0.26      | 1          |

| time<br>A | leuko<br>A | time<br>A | leuko<br>A | time<br>B | leuko<br>B | time<br>C | leuko<br>C | time<br>D | leuko<br>D | time<br>E | leuko<br>E |
|-----------|------------|-----------|------------|-----------|------------|-----------|------------|-----------|------------|-----------|------------|
| 0.35      | 1          | 0.18      | 1          | 1.22      | 1          | 0.20      | 1          | 0.32      | 1          | 0.31      | 1          |
| 0.30      | 1          | 0.50      | 1          | 0.27      | 1          | 0.09      | 1          | 0.75      | 1          | 0.65      | 1          |
| 2.19      | 1          | 5.33      | 1          | 0.25      | 1          | 0.12      | 1          | 0.25      | 1          | 0.30      | 1          |
| 0.22      | 1          | 0.21      | 1          | 0.20      | 1          | 0.25      | 1          | 0.58      | 1          | 0.26      | 1          |
| 0.19      | 1          | 0.17      | 1          | 0.28      | 1          | 0.21      | 1          | 0.09      | 1          | 0.49      | 1          |
| 0.19      | 1          | 0.18      | 1          | 0.21      | 1          | 0.23      | 1          | 7.96      | 1          | 0.15      | 1          |
| 0.19      | 1          | 0.19      | 1          | 0.27      | 1          | 0.36      | 1          | 0.21      | 1          | 0.13      | 1          |
| 0.22      | 1          | 0.18      | 1          | 0.23      | 1          | 3.42      | 1          | 0.22      | 1          | 2.68      | 1          |
| 0.22      | 1          | 0.18      | 1          | 0.22      | 1          | 0.20      | 1          | 0.19      | 1          | 0.23      | 1          |
| 0.17      | 1          | 0.21      | 1          | 0.23      | 1          | 0.21      | 1          | 0.19      | 1          | 0.32      | 1          |
| 0.19      | 1          | 4.88      | 1          | 7.06      | 1          | 0.31      | 1          | 0.20      | 1          | 0.34      | 1          |
| 0.20      | 1          | 0.24      | 1          | 0.31      | 1          | 1.74      | 1          | 0.19      | 1          | 0.31      | 1          |
| 0.18      | 1          | 0.20      | 1          | 0.44      | 1          | 0.08      | 1          | 0.17      | 1          | 0.27      | 1          |
| 0.20      | 1          | 0.19      | 1          | 0.25      | 1          | 0.12      | 1          | 0.16      | 1          | 0.30      | 1          |
| 0.20      | 1          | 0.21      | 1          | 0.25      | 1          | 0.08      | 1          | 0.18      | 1          | 0.29      | 1          |
| 0.19      | 1          | 0.20      | 1          | 0.22      | 1          | 0.10      | 1          | 0.18      | 1          | 0.26      | 1          |
| 0.21      | 1          | 0.19      | 1          | 0.99      | 1          | 0.20      | 1          | 0.19      | 1          | 0.26      | 1          |
| 0.21      | 1          | 0.17      | 1          | 0.27      | 1          | 0.21      | 1          | 0.21      | 1          | 4.67      | 1          |
| 0.20      | 1          | 2.25      | 1          | 0.34      | 1          | 0.21      | 1          | 0.22      | 1          | 0.25      | 1          |
| 0.15      | 1          | 0.23      | 1          | 0.24      | 1          | 0.07      | 1          | 0.23      | 1          | 0.28      | 1          |
| 0.19      | 1          | 0.11      | 1          | 0.21      | 1          | 0.07      | 1          | 0.22      | 1          | 0.27      | 1          |
| 0.19      | 1          | 0.28      | 1          | 0.29      | 1          | 0.18      | 1          | 0.23      | 1          | 0.25      | 1          |
| 0.19      | 1          | 0.18      | 1          | 0.21      | 1          | 0.20      | 1          | 0.21      | 1          | 0.25      | 1          |
| 0.19      | 1          | 0.18      | 1          | 0.18      | 1          | 0.20      | 1          | 0.25      | 1          | 8.91      | 1          |
| 0.21      | 1          | 0.20      | 1          | 0.26      | 1          | 0.39      | 1          | 0.44      | 1          | 0.25      | 1          |
| 0.20      | 1          | 0.20      | 1          | 0.22      | 1          | 0.21      | 1          | 0.31      | 1          | 0.35      | 1          |
| 0.49      | 1          | 0.24      | 1          | 5.31      | 1          | 0.07      | 1          | 0.27      | 1          | 0.27      | 1          |
| 4.41      | 1          | 0.22      | 1          | 0.24      | 1          | 0.23      | 1          | 0.20      | 1          | 0.23      | 1          |
| 0.24      | 1          | 0.40      | 1          | 0.21      | 1          | 3.53      | 1          | 0.27      | 1          | 0.28      | 1          |
| 0.14      | 1          | 2.80      | 1          | 0.22      | 1          | 0.22      | 1          | 5.45      | 1          | 2.43      | 1          |
| 0.26      | 1          | 0.45      | 1          | 0.37      | 1          | 0.24      | 1          | 0.21      | 1          | 0.76      | 1          |
| 0.20      | 1          | 0.20      | 1          | 0.22      | 1          | 0.33      | 1          | 0.47      | 1          | 0.27      | 1          |
| 0.20      | 1          | 0.20      | 1          | 0.22      | 1          | 0.26      | 1          | 0.51      | 1          | 0.26      | 1          |
| 0.17      | 1          | 0.19      | 1          | 0.31      | 1          | 0.23      | 1          | 0.23      | 1          | 2.79      | 1          |
| 0.21      | 1          | 0.19      | 1          | 0.23      | 1          | 0.25      | 1          | 0.19      | 1          | 0.21      | 1          |
| 0.34      | 1          | 0.20      | 1          | 0.22      | 1          | 0.09      | 1          | 0.17      | 1          | 0.38      | 1          |
| 0.22      | 1          | 0.18      | 1          | 0.22      | 1          | 0.10      | 1          | 0.18      | 1          | 0.25      | 1          |
| 0.20      | 1          | 0.17      | 1          | 0.29      | 1          | 0.21      | 1          | 0.18      | 1          | 0.25      | 1          |
| 0.20      | 1          | 8.42      | 1          | 0.22      | 1          | 0.21      | 1          | 0.18      | 1          | 0.28      | 1          |
| 0.43      | 1          | 0.24      | 1          | 0.24      | 1          | 0.36      | 1          | 0.19      | 1          | 0.39      | 1          |
| 0.59      | 1          | 0.33      | 1          | 0.18      | 1          | 0.63      | 1          | 0.19      | 1          | 2.67      | 1          |
| 0.24      | 1          | 0.19      | 1          | 0.42      | 1          | 20.34     | 1          | 2.88      | 1          | 0.27      | 1          |
| 0.18      | 1          | 0.18      | 1          | 0.24      | 1          | 0.78      | 1          | 0.22      | 1          | 0.28      | 1          |
| 0.19      | 1          | 0.19      | 1          | 0.22      | 1          | 5.28      | 1          | 0.17      | 1          | 0.25      | 1          |
| 0.20      | 1          | 0.14      | 1          | 2.30      | 1          | 0.20      | 1          | 0.19      | 1          | 0.26      | 1          |
| 0.20      | 1          | 0.18      | 1          | NA        | NA         | 0.26      | 1          | 0.21      | 1          | 0.26      | 1          |
| 0.20      | 1          | 0.17      | 1          | NA        | NA         | 0.33      | 1          | 8.85      | 1          | 0.25      | 1          |
| 0.18      | 1          | 0.18      | 1          | NA        | NA         | 0.18      | 1          | 0.20      | 1          | 0.26      | 1          |
| 0.20      | 1          | 0.19      | 1          | NA        | NA         | 0.19      | 1          | 0.18      | 1          | 0.28      | 1          |
| 0.19      | 1          | 0.16      | 1          | NA        | NA         | 0.27      | 1          | 0.27      | 1          | 1.80      | 1          |
| 0.21      | 1          | 0.19      | 1          | NA        | NA         | 0.31      | 1          | 0.29      | 1          | 0.25      | 1          |

| time<br>A | leuko<br>A | time<br>A | leuko<br>A | time<br>B | leuko<br>B | time<br>C | leuko<br>C | time<br>D | leuko<br>D | time<br>E | leuko<br>E |
|-----------|------------|-----------|------------|-----------|------------|-----------|------------|-----------|------------|-----------|------------|
| 0.19      | 1          | NA        | NA         | NA        | NA         | 0.17      | 1          | 0.37      | 1          | 0.27      | 1          |
| 0.22      | 1          | NA        | NA         | NA        | NA         | 0.27      | 1          | 0.21      | 1          | 0.27      | 1          |
| 2.76      | 1          | NA        | NA         | NA        | NA         | 0.19      | 1          | 0.24      | 1          | 5.86      | 1          |
| 0.24      | 1          | NA        | NA         | NA        | NA         | 0.21      | 1          | 0.33      | 1          | 0.41      | 1          |
| 0.19      | 1          | NA        | NA         | NA        | NA         | 0.17      | 1          | 0.20      | 1          | 0.27      | 1          |
| 0.22      | 1          | NA        | NA         | NA        | NA         | 0.22      | 1          | 0.29      | 1          | 0.22      | 1          |
| 0.20      | 1          | NA        | NA         | NA        | NA         | 0.06      | 1          | 0.29      | 1          | NA        | NA         |
| 0.19      | 1          | NA        | NA         | NA        | NA         | 8.33      | 1          | 0.18      | 1          | NA        | NA         |
| 0.18      | 1          | NA        | NA         | NA        | NA         | 0.26      | 1          | 0.39      | 1          | NA        | NA         |
| 0.20      | 1          | NA        | NA         | NA        | NA         | NA        | NA         | 0.18      | 1          | NA        | NA         |
| 0.20      | 1          | NA        | NA         | NA        | NA         | NA        | NA         | 0.29      | 1          | NA        | NA         |
| 0.20      | 1          | NA        | NA         | NA        | NA         | NA        | NA         | 0.54      | 1          | NA        | NA         |
| 0.18      | 1          | NA        | NA         | NA        | NA         | NA        | NA         | 0.20      | 1          | NA        | NA         |
| NA        | NA         | NA        | NA         | NA        | NA         | NA        | NA         | 0.23      | 1          | NA        | NA         |
| NA        | NA         | NA        | NA         | NA        | NA         | NA        | NA         | 1.46      | 1          | NA        | NA         |
| NA        | NA         | NA        | NA         | NA        | NA         | NA        | NA         | 0.22      | 1          | NA        | NA         |
| NA        | NA         | NA        | NA         | NA        | NA         | NA        | NA         | 0.22      | 1          | NA        | NA         |

## 1.6 OPT271

Table 6: Raw data of TBS OPT271.

| time<br>A | leuko<br>A | time<br>A | leuko<br>A | time<br>B | leuko<br>B | time<br>C | leuko<br>C | time<br>D | leuko<br>D | time<br>E | leuko<br>E |
|-----------|------------|-----------|------------|-----------|------------|-----------|------------|-----------|------------|-----------|------------|
| 0.00      | 1          | 0.00      | 1          | 0.00      | 0          | 0.00      | 1          | 0.00      | 1          | 0.00      | 1          |
| 0.26      | 1          | 0.25      | 1          | 0.34      | 0          | 0.20      | 1          | 0.24      | 1          | 0.28      | 1          |
| 0.32      | 1          | 5.69      | 1          | 3.97      | 0          | 0.42      | 1          | 0.23      | 1          | 0.25      | 1          |
| 0.20      | 1          | 0.27      | 1          | 1.84      | 1          | 0.92      | 1          | 2.58      | 1          | 0.90      | 1          |
| 0.17      | 1          | 0.24      | 1          | 0.28      | 1          | 7.02      | 1          | 0.18      | 1          | 0.28      | 1          |
| 0.19      | 1          | 0.21      | 1          | 1.24      | 1          | 0.09      | 1          | 0.40      | 1          | 0.26      | 1          |
| 0.19      | 1          | 8.53      | 1          | 2.12      | 1          | 4.88      | 1          | 0.19      | 1          | 0.91      | 0          |
| 0.18      | 1          | 2.32      | 1          | 0.28      | 1          | 0.21      | 1          | 0.47      | 1          | 0.31      | 0          |
| 0.17      | 1          | 3.30      | 1          | 0.26      | 1          | 2.37      | 1          | 0.35      | 1          | 0.74      | 0          |
| 0.20      | 1          | 2.57      | 1          | 15.04     | 1          | 0.21      | 1          | 0.28      | 1          | 2.44      | 0          |
| 0.15      | 1          | 0.24      | 1          | 0.30      | 1          | 2.61      | 1          | 0.41      | 1          | 9.97      | 1          |
| 0.23      | 1          | 0.22      | 1          | 0.97      | 1          | 1.38      | 1          | 0.21      | 1          | 0.25      | 1          |
| 0.22      | 1          | 0.19      | 1          | 0.25      | 1          | 0.03      | 1          | 0.14      | 1          | 5.02      | 0          |
| 6.52      | 1          | 0.18      | 1          | 0.61      | 1          | 0.13      | 1          | 0.14      | 1          | 7.39      | 1          |
| 9.01      | 1          | 1.50      | 1          | 6.98      | 1          | 0.20      | 1          | 6.65      | 0          | 0.26      | 1          |
| 6.18      | 1          | 2.58      | 1          | 0.27      | 1          | 0.53      | 1          | 0.57      | 0          | 0.23      | 1          |
| 0.23      | 1          | 0.25      | 1          | 0.46      | 1          | 0.09      | 1          | 1.30      | 0          | 0.25      | 1          |
| 3.36      | 1          | 0.21      | 1          | 0.26      | 1          | 2.28      | 1          | 4.56      | 0          | 0.27      | 1          |
| 0.87      | 1          | 0.20      | 1          | 0.53      | 1          | 0.06      | 1          | 0.39      | 0          | 0.27      | 1          |
| 4.88      | 1          | 0.19      | 1          | 0.25      | 1          | 0.13      | 1          | 0.69      | 0          | 0.76      | 1          |
| 0.25      | 1          | 0.18      | 1          | 0.25      | 1          | 0.22      | 1          | 0.76      | 0          | 0.75      | 0          |
| 0.28      | 1          | 0.19      | 1          | 0.24      | 1          | 0.19      | 1          | 0.63      | 0          | 3.77      | 0          |
| 0.20      | 1          | 0.23      | 1          | 0.24      | 1          | 0.08      | 1          | 2.09      | 0          | 4.80      | 0          |
| 4.35      | 1          | 1.53      | 1          | 0.73      | 0          | 0.11      | 1          | 0.95      | 0          | 2.45      | 0          |
| 0.25      | 1          | 0.22      | 1          | 7.65      | 1          | 0.18      | 1          | 0.62      | 0          | 5.19      | 1          |
| 3.73      | 1          | 0.18      | 1          | 0.35      | 1          | 0.22      | 1          | 25.39     | 1          | 0.23      | 1          |
| 0.23      | 1          | 0.17      | 1          | 0.27      | 1          | 0.17      | 1          | 0.21      | 1          | 6.10      | 0          |
| 0.38      | 1          | 0.18      | 1          | 0.67      | 1          | 0.19      | 1          | 0.33      | 1          | 7.37      | 1          |
| 0.40      | 1          | 2.55      | 1          | 71.36     | 0          | 0.20      | 1          | 0.19      | 1          | 0.26      | 1          |
| 6.01      | 1          | 0.21      | 1          | 0.53      | 0          | 0.20      | 1          | 0.28      | 1          | 0.25      | 1          |
| 0.27      | 1          | 0.19      | 1          | 1.04      | 1          | 0.36      | 1          | 0.19      | 1          | 0.28      | 1          |
| 0.17      | 1          | 0.17      | 1          | 0.33      | 1          | 0.60      | 1          | 0.15      | 1          | 0.58      | 1          |
| 3.58      | 1          | 0.18      | 1          | 1.50      | 1          | 6.22      | 1          | 0.16      | 1          | 0.29      | 1          |
| 0.20      | 1          | 1.88      | 1          | 0.29      | 1          | 0.22      | 1          | 0.24      | 1          | 0.26      | 1          |
| 0.20      | 1          | 4.11      | 1          | 0.23      | 1          | 0.21      | 1          | 0.17      | 1          | 0.32      | 1          |
| 0.20      | 1          | 0.24      | 1          | 0.19      | 1          | 0.32      | 1          | 0.17      | 1          | 0.24      | 1          |
| 0.20      | 1          | 0.27      | 1          | 0.54      | 1          | 0.26      | 1          | 0.16      | 1          | 3.31      | 0          |
| 0.21      | 1          | 0.78      | 1          | 0.30      | 1          | 0.22      | 1          | 0.22      | 1          | 10.44     | 1          |
| 0.21      | 1          | 1.73      | 0          | 0.50      | 1          | 0.21      | 1          | 0.28      | 1          | 0.26      | 1          |
| 0.17      | 1          | 4.30      | 1          | 17.19     | 0          | 0.20      | 1          | 0.22      | 1          | 0.23      | 1          |
| 0.20      | 1          | 0.25      | 1          | 0.45      | 0          | 2.30      | 1          | 0.35      | 1          | 0.25      | 1          |
| 0.21      | 1          | 0.20      | 1          | 0.37      | 0          | 0.21      | 1          | 0.23      | 1          | 0.26      | 1          |
| 0.21      | 1          | 0.19      | 1          | 1.03      | 0          | 0.20      | 1          | 0.19      | 1          | 0.23      | 1          |
| 0.21      | 1          | 0.19      | 1          | 2.10      | 1          | 0.20      | 1          | 0.47      | 1          | 0.24      | 1          |
| 0.30      | 1          | 0.19      | 1          | 0.29      | 1          | 0.08      | 1          | 2.86      | 0          | 0.23      | 1          |
| 4.15      | 1          | 0.20      | 1          | 0.41      | 1          | 0.31      | 1          | 0.86      | 0          | 8.50      | 1          |
| 0.23      | 1          | 7.54      | 1          | 0.55      | 1          | 0.08      | 1          | 1.11      | 0          | 0.29      | 1          |
| 0.21      | 1          | 0.24      | 1          | 0.30      | 1          | 0.11      | 1          | 2.68      | 0          | 0.26      | 1          |

| time<br>A | leuko<br>A | time<br>A | leuko<br>A | time<br>B | leuko<br>B | time<br>C | leuko<br>C | time<br>D | leuko<br>D | time<br>E | leuko<br>E |
|-----------|------------|-----------|------------|-----------|------------|-----------|------------|-----------|------------|-----------|------------|
| 0.20      | 1          | 0.22      | 1          | 0.26      | 1          | 0.10      | 1          | 1.89      | 0          | 0.27      | 1          |
| 0.19      | 1          | 2.15      | 1          | 9.17      | 1          | 1.66      | 1          | 1.40      | 0          | 2.40      | 0          |
| 0.18      | 1          | 0.23      | 1          | 0.28      | 1          | 0.21      | 1          | 3.24      | 0          | 6.37      | 0          |
| 0.46      | 0          | 0.21      | 1          | 0.25      | 1          | 0.19      | 1          | 4.50      | 1          | 8.15      | 1          |
| 4.50      | 0          | 0.23      | 1          | 1.27      | 1          | 0.23      | 1          | 0.33      | 1          | 0.22      | 1          |
| 0.36      | 0          | 0.20      | 1          | 0.34      | 1          | 0.24      | 1          | 0.35      | 1          | 0.33      | 1          |
| 1.58      | 1          | 0.17      | 1          | 0.28      | 1          | 2.01      | 1          | 0.25      | 1          | 0.25      | 1          |
| 0.21      | 1          | 7.41      | 1          | 0.25      | 1          | 0.19      | 1          | 0.27      | 1          | 3.92      | 0          |
| 0.19      | 1          | 0.25      | 1          | 0.29      | 1          | 0.22      | 1          | 0.25      | 1          | 0.52      | 0          |
| 0.20      | 1          | 0.22      | 1          | 6.24      | 0          | 0.19      | 1          | 0.26      | 1          | 0.71      | 0          |
| 0.19      | 1          | 0.21      | 1          | 1.08      | 0          | 0.22      | 1          | 0.45      | 1          | 1.66      | 0          |
| 0.22      | 1          | 0.19      | 1          | 1.18      | 0          | 0.05      | 1          | 0.23      | 1          | 1.86      | 0          |
| 0.18      | 1          | 7.89      | 1          | 1.35      | 0          | 0.11      | 1          | 0.25      | 1          | 5.99      | 1          |
| 0.15      | 1          | 0.22      | 1          | 17.90     | 0          | 3.05      | 1          | 0.48      | 1          | 0.34      | 1          |
| 0.18      | 1          | 0.21      | 1          | 0.51      | 0          | 0.08      | 1          | 0.25      | 1          | 0.32      | 1          |
| 0.29      | 0          | 0.21      | 1          | 0.57      | 0          | 0.12      | 1          | 0.29      | 1          | 0.37      | 1          |
| 0.70      | 0          | 0.21      | 1          | 0.52      | 0          | 0.07      | 1          | 1.19      | 0          | 0.74      | 1          |
| 0.70      | 0          | 0.20      | 1          | 2.22      | 0          | 0.16      | 1          | 0.30      | 0          | 0.26      | 1          |
| 5.26      | 1          | 0.19      | 1          | 0.51      | 0          | 0.22      | 1          | 0.34      | 0          | 0.23      | 1          |
| 0.24      | 1          | 8.73      | 1          | 2.15      | 0          | 0.22      | 1          | 0.61      | 0          | 0.25      | 1          |
| 1.22      | 0          | 0.22      | 1          | 1.24      | 1          | 0.21      | 1          | 1.01      | 0          | 0.27      | 1          |
| 4.26      | 1          | 0.20      | 1          | 0.30      | 1          | 0.04      | 1          | 0.99      | 0          | 6.78      | 0          |
| 0.22      | 1          | 0.18      | 1          | 0.22      | 1          | 0.12      | 1          | 2.01      | 0          | 2.40      | 0          |
| 5.85      | 1          | 4.84      | 1          | 0.40      | 1          | 0.19      | 1          | 1.53      | 0          | 3.07      | 0          |
| 0.22      | 1          | 0.21      | 1          | 0.43      | 1          | 0.20      | 1          | 0.40      | 0          | 6.16      | 1          |
| 0.21      | 1          | 0.21      | 1          | 0.67      | 1          | 0.19      | 1          | 1.08      | 0          | 0.31      | 1          |
| 0.26      | 1          | 0.20      | 1          | 14.74     | 0          | 0.06      | 1          | 1.65      | 0          | 0.28      | 1          |
| 0.20      | 1          | 0.19      | 1          | 0.46      | 0          | 0.12      | 1          | 1.95      | 0          | 6.65      | 0          |
| 0.19      | 1          | 0.21      | 1          | 1.09      | 0          | 0.07      | 1          | 3.20      | 1          | 1.44      | 0          |
| 0.52      | 0          | 0.21      | 1          | 0.87      | 0          | 0.14      | 1          | 0.28      | 1          | 5.61      | 1          |
| 0.24      | 0          | 3.28      | 1          | 2.76      | 1          | 0.21      | 1          | 0.71      | 1          | 0.27      | 1          |
| 6.47      | 1          | 0.22      | 1          | 0.36      | 1          | 0.21      | 1          | 0.23      | 1          | 0.25      | 1          |
| 0.28      | 1          | 0.21      | 1          | 0.30      | 1          | 0.23      | 1          | 0.22      | 1          | 0.95      | 1          |
| 0.25      | 1          | 0.22      | 1          | 0.35      | 1          | 0.18      | 1          | 0.37      | 1          | 0.26      | 1          |
| 0.25      | 1          | 0.26      | 1          | 0.29      | 1          | 1.45      | 1          | 0.21      | 1          | 9.06      | 0          |
| 0.36      | 0          | 0.22      | 1          | 0.64      | 1          | 0.21      | 1          | 0.30      | 1          | 1.71      | 0          |
| 0.31      | 0          | 0.19      | 1          | 0.31      | 1          | 0.22      | 1          | 0.64      | 1          | 3.68      | 0          |
| 2.09      | 1          | 0.31      | 1          | 0.23      | 1          | 0.19      | 1          | 0.24      | 1          | 4.29      | 1          |
| 0.24      | 1          | 7.55      | 1          | 25.79     | 0          | 0.22      | 1          | 0.24      | 1          | 0.28      | 1          |
| 0.19      | 1          | 0.24      | 1          | 0.41      | 0          | 0.19      | 1          | 4.22      | 0          | 6.56      | 0          |
| 0.19      | 1          | 0.21      | 1          | 0.28      | 0          | 0.22      | 1          | 0.32      | 0          | 3.09      | 0          |
| 0.19      | 1          | 0.19      | 1          | 5.78      | 0          | 0.34      | 1          | 0.33      | 0          | 8.06      | 1          |
| 0.18      | 1          | 0.20      | 1          | 0.34      | 0          | 0.24      | 1          | 0.60      | 0          | 0.30      | 1          |
| 0.18      | 1          | 0.19      | 1          | 0.27      | 0          | 0.35      | 1          | 3.47      | 0          | 0.28      | 1          |
| 1.85      | 0          | 0.20      | 1          | 7.94      | 1          | 0.18      | 1          | 0.60      | 0          | 0.27      | 1          |
| 2.91      | 1          | 0.20      | 1          | 0.36      | 1          | 0.20      | 1          | 0.65      | 0          | 0.27      | 1          |
| 0.22      | 1          | 0.20      | 1          | 0.29      | 1          | 2.19      | 1          | 0.94      | 0          | 0.30      | 1          |
| 0.22      | 1          | 0.23      | 1          | 0.25      | 1          | 0.18      | 1          | 1.63      | 0          | 0.27      | 1          |
| 0.19      | 1          | 0.22      | 1          | 4.93      | 1          | 0.25      | 1          | 1.46      | 0          | 0.24      | 1          |
| 0.18      | 1          | 6.26      | 1          | 0.33      | 1          | 2.86      | 1          | 1.05      | 0          | 1.85      | 0          |
| 0.18      | 1          | 0.24      | 1          | 0.25      | 1          | 0.20      | 1          | 0.98      | 0          | 7.75      | 0          |

| time<br>A | leuko<br>A | time<br>A | leuko<br>A | time<br>B | leuko<br>B | time<br>C | leuko<br>C | time<br>D | leuko<br>D | time<br>E | leuko<br>E |
|-----------|------------|-----------|------------|-----------|------------|-----------|------------|-----------|------------|-----------|------------|
| 0.17      | 1          | 0.24      | 1          | 0.25      | 1          | 0.22      | 1          | 2.47      | 0          | 76.23     | 1          |
| 0.18      | 1          | 0.24      | 1          | 0.58      | 1          | 0.23      | 1          | 7.27      | 1          | 0.29      | 1          |
| 0.30      | 1          | 0.24      | 1          | 0.24      | 1          | 0.19      | 1          | 0.23      | 1          | 0.26      | 1          |
| 0.19      | 1          | 5.33      | 1          | 1.25      | 1          | 0.26      | 1          | 0.98      | 1          | 3.91      | 0          |
| 4.37      | 1          | 0.28      | 1          | 0.30      | 1          | 1.56      | 1          | 0.23      | 1          | 10.71     | 1          |
| 0.25      | 1          | 0.20      | 1          | 6.75      | 1          | 0.36      | 1          | 0.29      | 1          | 0.25      | 1          |
| 0.20      | 1          | 0.22      | 1          | 0.35      | 1          | 2.51      | 1          | 0.52      | 1          | 0.37      | 1          |
| 3.20      | 1          | 0.18      | 1          | 0.29      | 1          | 4.38      | 1          | 0.22      | 1          | 0.26      | 1          |
| 0.22      | 1          | 0.18      | 1          | 0.81      | 1          | 0.32      | 1          | 0.28      | 1          | 0.26      | 1          |
| 0.19      | 1          | 5.55      | 1          | 0.40      | 1          | 0.19      | 1          | 0.20      | 1          | 0.27      | 1          |
| 0.20      | 1          | 1.10      | 1          | 0.36      | 1          | 0.21      | 1          | 0.29      | 1          | 0.25      | 1          |
| 0.21      | 1          | 1.83      | 1          | 0.32      | 1          | 0.07      | 1          | 0.23      | 1          | 0.24      | 1          |
| 0.16      | 1          | 0.22      | 1          | 0.41      | 1          | 0.10      | 1          | 0.70      | 1          | 44.41     | 1          |
| 0.18      | 1          | 0.21      | 1          | 4.95      | 1          | 0.22      | 1          | 0.23      | 1          | 0.34      | 1          |
| 3.92      | 0          | 1.81      | 1          | 0.39      | 1          | 0.21      | 1          | 10.70     | 0          | 0.22      | 1          |
| 2.19      | 1          | 36.86     | 1          | 0.29      | 1          | 0.18      | 1          | 1.03      | 0          | 0.29      | 1          |
| 0.18      | 1          | 1.13      | 0          | 0.29      | 1          | 0.19      | 1          | 2.12      | 0          | 0.23      | 1          |
| 0.19      | 1          | 3.77      | 0          | 0.60      | 1          | 0.07      | 1          | 0.82      | 0          | 0.25      | 1          |
| 0.17      | 1          | 22.73     | 1          | 0.50      | 1          | 0.16      | 1          | 5.27      | 0          | 0.22      | 1          |
| 0.15      | 1          | 0.20      | 1          | 0.43      | 1          | 1.74      | 1          | 1.61      | 0          | 3.25      | 0          |
| 0.19      | 1          | 0.43      | 1          | 0.34      | 1          | 2.45      | 1          | 6.92      | 1          | 1.84      | 0          |
| 0.34      | 1          | 1.33      | 0          | 3.73      | 0          | 0.22      | 1          | 0.48      | 1          | 15.19     | 1          |
| 0.22      | 1          | 2.36      | 1          | 0.42      | 0          | 0.08      | 1          | 0.19      | 1          | 0.22      | 1          |
| 0.21      | 1          | 0.27      | 1          | 5.38      | 1          | 0.11      | 1          | 0.18      | 1          | 0.28      | 1          |
| 0.15      | 1          | 0.17      | 1          | 0.35      | 1          | 0.23      | 1          | 0.40      | 1          | 0.24      | 1          |
| 6.26      | 1          | 0.20      | 1          | 0.30      | 1          | 0.20      | 1          | 0.17      | 1          | 13.43     | 1          |
| 0.24      | 1          | 0.20      | 1          | 1.41      | 1          | 0.20      | 1          | 0.20      | 1          | 0.21      | 1          |
| 0.19      | 1          | 0.41      | 1          | 0.35      | 1          | 0.20      | 1          | 0.35      | 1          | 0.29      | 1          |
| 0.17      | 1          | 1.19      | 0          | 0.96      | 0          | 0.19      | 1          | 0.43      | 1          | 2.82      | 0          |
| 4.27      | 1          | 5.87      | 1          | 0.45      | 0          | 0.20      | 1          | 0.19      | 1          | 2.05      | 0          |
| 0.21      | 1          | 0.24      | 1          | 11.41     | 0          | 0.20      | 1          | 0.29      | 1          | 8.99      | 1          |
| 0.19      | 1          | 0.21      | 1          | 3.61      | 1          | 1.81      | 1          | 0.36      | 1          | 0.30      | 1          |
| 0.17      | 1          | 0.18      | 1          | 0.39      | 1          | 0.22      | 1          | 0.18      | 1          | 15.97     | 1          |
| 0.17      | 1          | 0.15      | 1          | 0.28      | 1          | 0.20      | 1          | 0.23      | 1          | 8.43      | 1          |
| 0.15      | 1          | 0.17      | 1          | 0.42      | 1          | 0.40      | 1          | 0.37      | 1          | 0.25      | 1          |
| 0.15      | 1          | 0.19      | 1          | 0.30      | 1          | 0.23      | 1          | 2.12      | 0          | 2.27      | 0          |
| 0.18      | 1          | 0.20      | 1          | 0.26      | 1          | 1.40      | 1          | 0.61      | 0          | 12.60     | 1          |
| 0.18      | 1          | 6.97      | 1          | 3.97      | 0          | 1.99      | 1          | 0.27      | 0          | 0.24      | 1          |
| 2.44      | 1          | 0.27      | 1          | 10.66     | 1          | 0.18      | 1          | 0.62      | 0          | 0.80      | 1          |
| 0.24      | 1          | 0.19      | 1          | 0.33      | 1          | 0.21      | 1          | 0.53      | 0          | 7.41      | 1          |
| 0.20      | 1          | 0.16      | 1          | 3.40      | 1          | 0.08      | 1          | 1.72      | 0          | 0.27      | 1          |
| 0.18      | 1          | 0.27      | 1          | 0.29      | 1          | 0.10      | 1          | 1.23      | 0          | 8.17      | 1          |
| 0.19      | 1          | 3.66      | 1          | 0.23      | 1          | 0.08      | 1          | 0.61      | 0          | 0.28      | 1          |
| 0.26      | 1          | 0.21      | 1          | 0.69      | 1          | 0.13      | 1          | 0.89      | 0          | 0.24      | 1          |
| 0.17      | 1          | 0.19      | 1          | 0.24      | 1          | 1.57      | 1          | 3.89      | 0          | 4.80      | 0          |
| 0.19      | 1          | 0.22      | 1          | 0.23      | 1          | 0.20      | 1          | 0.53      | 0          | 12.74     | 1          |
| 0.19      | 1          | 0.36      | 1          | 0.35      | 1          | 0.21      | 1          | 0.34      | 0          | 0.23      | 1          |
| 0.17      | 1          | 0.17      | 1          | 4.23      | 0          | 0.20      | 1          | 0.76      | 0          | 0.27      | 1          |
| 0.17      | 1          | 0.22      | 1          | 0.38      | 0          | 0.26      | 1          | 0.41      | 0          | 0.11      | 1          |
| 6.52      | 1          | 6.93      | 1          | 5.59      | 1          | 0.32      | 1          | 0.25      | 0          | 0.23      | 1          |
| 0.32      | 1          | 0.17      | 1          | 0.31      | 1          | 0.21      | 1          | 5.52      | 1          | 25.63     | 1          |

| time<br>A | leuko<br>A | time<br>A | leuko<br>A | time<br>B | leuko<br>B | time<br>C | leuko<br>C | time<br>D | leuko<br>D | time<br>E | leuko<br>E |
|-----------|------------|-----------|------------|-----------|------------|-----------|------------|-----------|------------|-----------|------------|
| 0.26      | 1          | 0.24      | 1          | 0.43      | 1          | 0.20      | 1          | 0.24      | 1          | 0.33      | 1          |
| 0.21      | 1          | 0.20      | 1          | 0.25      | 1          | 0.20      | 1          | 0.22      | 1          | 0.32      | 1          |
| 0.17      | 1          | 1.76      | 0          | 0.32      | 1          | 0.20      | 1          | 0.26      | 1          | 6.17      | 1          |
| 0.29      | 0          | 0.22      | 0          | 22.23     | 1          | 0.18      | 1          | 0.22      | 1          | 0.26      | 1          |
| 0.61      | 0          | 10.77     | 1          | 0.35      | 1          | 0.08      | 1          | 0.37      | 1          | NA        | NA         |
| 2.54      | 1          | 0.01      | 1          | 0.61      | 1          | 0.09      | 1          | 0.20      | 1          | NA        | NA         |
| 1.62      | 1          | 0.20      | 1          | 0.27      | 1          | 0.36      | 1          | 0.21      | 1          | NA        | NA         |
| 2.89      | 1          | 0.21      | 1          | 0.24      | 1          | 2.54      | 1          | 0.43      | 1          | NA        | NA         |
| 0.21      | 1          | 8.67      | 1          | 0.23      | 1          | 0.21      | 1          | 0.44      | 1          | NA        | NA         |
| 0.18      | 1          | 10.34     | 1          | 3.76      | 0          | 0.22      | 1          | 0.22      | 1          | NA        | NA         |
| 0.20      | 1          | 0.18      | 1          | 0.60      | 0          | 0.08      | 1          | 0.23      | 1          | NA        | NA         |
| 0.20      | 1          | 0.25      | 1          | 0.88      | 1          | 0.12      | 1          | 0.42      | 1          | NA        | NA         |
| 1.75      | 1          | NA        | NA         | 0.37      | 1          | 0.21      | 1          | 0.39      | 1          | NA        | NA         |
| 0.21      | 1          | NA        | NA         | 0.38      | 1          | 0.42      | 1          | 0.34      | 1          | NA        | NA         |
| 0.19      | 1          | NA        | NA         | 4.90      | 0          | 0.20      | 1          | 0.24      | 1          | NA        | NA         |
| 3.29      | 1          | NA        | NA         | 1.25      | 1          | 0.19      | 1          | 0.17      | 1          | NA        | NA         |
| 0.21      | 1          | NA        | NA         | 0.30      | 1          | 0.21      | 1          | 0.17      | 1          | NA        | NA         |
| 0.20      | 1          | NA        | NA         | 1.18      | 0          | 1.13      | 1          | 0.38      | 0          | NA        | NA         |
| NA        | NA         | NA        | NA         | 3.50      | 1          | 0.10      | 1          | 5.87      | 0          | NA        | NA         |
| NA        | NA         | NA        | NA         | 0.34      | 1          | 0.10      | 1          | 1.43      | 0          | NA        | NA         |
| NA        | NA         | NA        | NA         | 0.28      | 1          | 0.20      | 1          | 1.02      | 0          | NA        | NA         |
| NA        | NA         | NA        | NA         | 0.25      | 1          | 0.08      | 1          | 0.78      | 0          | NA        | NA         |
| NA        | NA         | NA        | NA         | 0.64      | 1          | 0.14      | 1          | 4.70      | 0          | NA        | NA         |
| NA        | NA         | NA        | NA         | 0.34      | 1          | 0.90      | 1          | 0.67      | 0          | NA        | NA         |
| NA        | NA         | NA        | NA         | 9.71      | 1          | 0.24      | 1          | 1.74      | 0          | NA        | NA         |
| NA        | NA         | NA        | NA         | 0.32      | 1          | 0.20      | 1          | 0.37      | 0          | NA        | NA         |
| NA        | NA         | NA        | NA         | 0.56      | 1          | 0.67      | 1          | 0.50      | 0          | NA        | NA         |
| NA        | NA         | NA        | NA         | 0.30      | 1          | 0.22      | 1          | 5.44      | 1          | NA        | NA         |
| NA        | NA         | NA        | NA         | 4.59      | 0          | 0.21      | 1          | 0.22      | 1          | NA        | NA         |
| NA        | NA         | NA        | NA         | 0.35      | 0          | 0.23      | 1          | 0.32      | 1          | NA        | NA         |
| NA        | NA         | NA        | NA         | 0.64      | 0          | 0.70      | 1          | 0.20      | 1          | NA        | NA         |
| NA        | NA         | NA        | NA         | 0.79      | 1          | 0.76      | 1          | 0.26      | 1          | NA        | NA         |
| NA        | NA         | NA        | NA         | 0.29      | 1          | 0.23      | 1          | 0.22      | 1          | NA        | NA         |
| NA        | NA         | NA        | NA         | 0.70      | 1          | 0.22      | 1          | 0.22      | 1          | NA        | NA         |
| NA        | NA         | NA        | NA         | 0.37      | 1          | 0.21      | 1          | 0.23      | 1          | NA        | NA         |
| NA        | NA         | NA        | NA         | 0.27      | 1          | 0.21      | 1          | 0.21      | 1          | NA        | NA         |
| NA        | NA         | NA        | NA         | 0.24      | 1          | 0.21      | 1          | 0.23      | 1          | NA        | NA         |
| NA        | NA         | NA        | NA         | 0.25      | 1          | 0.88      | 1          | 0.29      | 1          | NA        | NA         |
| NA        | NA         | NA        | NA         | 0.26      | 1          | 0.23      | 1          | 0.22      | 1          | NA        | NA         |
| NA        | NA         | NA        | NA         | 5.23      | 1          | 3.48      | 1          | 0.39      | 1          | NA        | NA         |
| NA        | NA         | NA        | NA         | 0.32      | 1          | 0.25      | 1          | 0.22      | 1          | NA        | NA         |
| NA        | NA         | NA        | NA         | 0.27      | 1          | 1.55      | 1          | 0.30      | 1          | NA        | NA         |
| NA        | NA         | NA        | NA         | 0.44      | 1          | 0.23      | 1          | 0.40      | 1          | NA        | NA         |
| NA        | NA         | NA        | NA         | 0.29      | 1          | 0.97      | 1          | 0.22      | 1          | NA        | NA         |
| NA        | NA         | NA        | NA         | 3.24      | 0          | 0.24      | 1          | 0.21      | 1          | NA        | NA         |
| NA        | NA         | NA        | NA         | 10.99     | 0          | 0.22      | 1          | 0.20      | 1          | NA        | NA         |
| NA        | NA         | NA        | NA         | 2.70      | 1          | 3.36      | 1          | 0.17      | 1          | NA        | NA         |
| NA        | NA         | NA        | NA         | 0.26      | 1          | 1.51      | 1          | 0.21      | 1          | NA        | NA         |
| NA        | NA         | NA        | NA         | 0.22      | 1          | 1.44      | 1          | 0.54      | 1          | NA        | NA         |
| NA        | NA         | NA        | NA         | 0.22      | 1          | 0.21      | 1          | 0.30      | 0          | NA        | NA         |
| NA        | NA         | NA        | NA         | 0.24      | 1          | 0.07      | 1          | 0.25      | 0          | NA        | NA         |



| time<br>A | leuko<br>A | time<br>A | leuko<br>A | time<br>B | leuko<br>B | time<br>C | leuko<br>C | time<br>D | leuko<br>D | time<br>E | leuko<br>E |
|-----------|------------|-----------|------------|-----------|------------|-----------|------------|-----------|------------|-----------|------------|
| NA        | NA         | NA        | NA         | 0.67      | 1          | 0.26      | 1          | 0.21      | 0          | NA        | NA         |
| NA        | NA         | NA        | NA         | 0.27      | 1          | 1.38      | 1          | 0.22      | 0          | NA        | NA         |
| NA        | NA         | NA        | NA         | 0.24      | 1          | 2.01      | 1          | 2.02      | 0          | NA        | NA         |
| NA        | NA         | NA        | NA         | 13.25     | 1          | 0.22      | 1          | 0.55      | 0          | NA        | NA         |
| NA        | NA         | NA        | NA         | 0.33      | 1          | 2.59      | 1          | 0.29      | 0          | NA        | NA         |
| NA        | NA         | NA        | NA         | 0.31      | 1          | 0.06      | 1          | 0.66      | 0          | NA        | NA         |
| NA        | NA         | NA        | NA         | 0.30      | 1          | 5.30      | 1          | 2.01      | 0          | NA        | NA         |
| NA        | NA         | NA        | NA         | 6.94      | 0          | 5.19      | 1          | 0.61      | 0          | NA        | NA         |
| NA        | NA         | NA        | NA         | 1.70      | 0          | 11.78     | 1          | 0.92      | 0          | NA        | NA         |
| NA        | NA         | NA        | NA         | 11.03     | 1          | 0.22      | 1          | 1.14      | 0          | NA        | NA         |
| NA        | NA         | NA        | NA         | 0.32      | 1          | 0.08      | 1          | 1.06      | 0          | NA        | NA         |
| NA        | NA         | NA        | NA         | 0.25      | 1          | 0.14      | 1          | 1.01      | 0          | NA        | NA         |
| NA        | NA         | NA        | NA         | 0.22      | 1          | 0.07      | 1          | 1.56      | 0          | NA        | NA         |
| NA        | NA         | NA        | NA         | 4.09      | 1          | 0.23      | 1          | 0.45      | 0          | NA        | NA         |
| NA        | NA         | NA        | NA         | 0.28      | 1          | 0.22      | 1          | 0.83      | 0          | NA        | NA         |
| NA        | NA         | NA        | NA         | 5.88      | 1          | 1.31      | 1          | 0.42      | 0          | NA        | NA         |
| NA        | NA         | NA        | NA         | 0.38      | 1          | 0.21      | 1          | 15.93     | 1          | NA        | NA         |
| NA        | NA         | NA        | NA         | 0.28      | 1          | 0.21      | 1          | 0.24      | 1          | NA        | NA         |
| NA        | NA         | NA        | NA         | 3.85      | 1          | 0.24      | 1          | 0.31      | 1          | NA        | NA         |
| NA        | NA         | NA        | NA         | 0.36      | 1          | 0.22      | 1          | 0.49      | 1          | NA        | NA         |
| NA        | NA         | NA        | NA         | 0.30      | 1          | 0.19      | 1          | 0.22      | 1          | NA        | NA         |
| NA        | NA         | NA        | NA         | 0.27      | 1          | 0.42      | 1          | 0.20      | 1          | NA        | NA         |
| NA        | NA         | NA        | NA         | 0.91      | 0          | 1.38      | 1          | 0.33      | 1          | NA        | NA         |
| NA        | NA         | NA        | NA         | 3.52      | 1          | 0.21      | 1          | 0.22      | 1          | NA        | NA         |
| NA        | NA         | NA        | NA         | 0.32      | 1          | 0.21      | 1          | 0.21      | 1          | NA        | NA         |
| NA        | NA         | NA        | NA         | 2.15      | 1          | 0.21      | 1          | 0.27      | 1          | NA        | NA         |
| NA        | NA         | NA        | NA         | 0.78      | 1          | 0.07      | 1          | 0.22      | 1          | NA        | NA         |
| NA        | NA         | NA        | NA         | 4.80      | 0          | 2.05      | 1          | 0.30      | 1          | NA        | NA         |
| NA        | NA         | NA        | NA         | 1.17      | 1          | 0.21      | 1          | 0.93      | 0          | NA        | NA         |
| NA        | NA         | NA        | NA         | 0.32      | 1          | 0.20      | 1          | 1.04      | 0          | NA        | NA         |
| NA        | NA         | NA        | NA         | 0.26      | 1          | 0.18      | 1          | 1.67      | 0          | NA        | NA         |
| NA        | NA         | NA        | NA         | 0.27      | 1          | 0.23      | 1          | 1.05      | 0          | NA        | NA         |
| NA        | NA         | NA        | NA         | 0.25      | 1          | 0.26      | 1          | 0.43      | 0          | NA        | NA         |
| NA        | NA         | NA        | NA         | 0.27      | 1          | 0.19      | 1          | 1.81      | 0          | NA        | NA         |
| NA        | NA         | NA        | NA         | 0.20      | 1          | 0.20      | 1          | 1.18      | 0          | NA        | NA         |
| NA        | NA         | NA        | NA         | 9.57      | 1          | 0.21      | 1          | 0.49      | 0          | NA        | NA         |
| NA        | NA         | NA        | NA         | 0.41      | 1          | 4.25      | 0          | 0.92      | 0          | NA        | NA         |
| NA        | NA         | NA        | NA         | 3.23      | 0          | 3.40      | 0          | 5.16      | 1          | NA        | NA         |
| NA        | NA         | NA        | NA         | 0.67      | 0          | 2.14      | 1          | 0.24      | 1          | NA        | NA         |
| NA        | NA         | NA        | NA         | 0.73      | 0          | 0.21      | 1          | 0.18      | 1          | NA        | NA         |
| NA        | NA         | NA        | NA         | 0.28      | 0          | 0.20      | 1          | 0.24      | 1          | NA        | NA         |
| NA        | NA         | NA        | NA         | 5.38      | 0          | 0.19      | 1          | 0.30      | 1          | NA        | NA         |
| NA        | NA         | NA        | NA         | 3.38      | 1          | 0.21      | 1          | 0.88      | 0          | NA        | NA         |
| NA        | NA         | NA        | NA         | 0.40      | 1          | 0.29      | 1          | 0.74      | 0          | NA        | NA         |
| NA        | NA         | NA        | NA         | 0.31      | 1          | 0.27      | 1          | 0.65      | 0          | NA        | NA         |
| NA        | NA         | NA        | NA         | 0.27      | 1          | 0.31      | 1          | 1.36      | 0          | NA        | NA         |
| NA        | NA         | NA        | NA         | 6.43      | 1          | 0.08      | 1          | 1.23      | 0          | NA        | NA         |
| NA        | NA         | NA        | NA         | 0.39      | 1          | 0.10      | 1          | 0.34      | 0          | NA        | NA         |
| NA        | NA         | NA        | NA         | 0.29      | 1          | 0.21      | 1          | 1.61      | 0          | NA        | NA         |
| NA        | NA         | NA        | NA         | 0.27      | 1          | 0.20      | 1          | 1.68      | 0          | NA        | NA         |
| NA        | NA         | NA        | NA         | 3.13      | 1          | 0.22      | 1          | 2.48      | 0          | NA        | NA         |

| time<br>A | leuko<br>A | time<br>A | leuko<br>A | time<br>B | leuko<br>B | time<br>C | leuko<br>C | time<br>D | leuko<br>D | time<br>E | leuko<br>E |
|-----------|------------|-----------|------------|-----------|------------|-----------|------------|-----------|------------|-----------|------------|
| NA        | NA         | NA        | NA         | 0.36      | 1          | 0.19      | 1          | 9.08      | 1          | NA        | NA         |
| NA        | NA         | NA        | NA         | 1.86      | 0          | 0.20      | 1          | 0.23      | 1          | NA        | NA         |
| NA        | NA         | NA        | NA         | 0.38      | 0          | 0.21      | 1          | 0.23      | 1          | NA        | NA         |
| NA        | NA         | NA        | NA         | 0.32      | 0          | 0.22      | 1          | 0.79      | 1          | NA        | NA         |
| NA        | NA         | NA        | NA         | 4.41      | 1          | 0.08      | 1          | 0.34      | 1          | NA        | NA         |
| NA        | NA         | NA        | NA         | 0.34      | 1          | 0.13      | 1          | 0.27      | 1          | NA        | NA         |
| NA        | NA         | NA        | NA         | 0.28      | 1          | 0.61      | 1          | 0.23      | 1          | NA        | NA         |
| NA        | NA         | NA        | NA         | 1.39      | 0          | 0.21      | 1          | 0.26      | 1          | NA        | NA         |
| NA        | NA         | NA        | NA         | 0.51      | 0          | 0.21      | 1          | 0.31      | 1          | NA        | NA         |
| NA        | NA         | NA        | NA         | 1.80      | 0          | 0.54      | 1          | 1.17      | 0          | NA        | NA         |
| NA        | NA         | NA        | NA         | 0.45      | 0          | 1.07      | 0          | 0.42      | 0          | NA        | NA         |
| NA        | NA         | NA        | NA         | 7.18      | 1          | 2.97      | 1          | 0.67      | 0          | NA        | NA         |
| NA        | NA         | NA        | NA         | 0.59      | 1          | 0.27      | 1          | 2.15      | 0          | NA        | NA         |
| NA        | NA         | NA        | NA         | 0.82      | 1          | 0.21      | 1          | 0.38      | 0          | NA        | NA         |
| NA        | NA         | NA        | NA         | NA        | NA         | 0.47      | 1          | 0.47      | 0          | NA        | NA         |
| NA        | NA         | NA        | NA         | NA        | NA         | 0.18      | 1          | 0.84      | 0          | NA        | NA         |
| NA        | NA         | NA        | NA         | NA        | NA         | 2.93      | 0          | 1.31      | 0          | NA        | NA         |
| NA        | NA         | NA        | NA         | NA        | NA         | 3.06      | 1          | 0.68      | 0          | NA        | NA         |
| NA        | NA         | NA        | NA         | NA        | NA         | 0.21      | 1          | 0.55      | 0          | NA        | NA         |
| NA        | NA         | NA        | NA         | NA        | NA         | 0.27      | 1          | 0.95      | 0          | NA        | NA         |
| NA        | NA         | NA        | NA         | NA        | NA         | 0.20      | 1          | 0.32      | 0          | NA        | NA         |
| NA        | NA         | NA        | NA         | NA        | NA         | 0.20      | 1          | 0.77      | 0          | NA        | NA         |
| NA        | NA         | NA        | NA         | NA        | NA         | 0.39      | 1          | 0.29      | 0          | NA        | NA         |
| NA        | NA         | NA        | NA         | NA        | NA         | 0.19      | 1          | 3.60      | 1          | NA        | NA         |
| NA        | NA         | NA        | NA         | NA        | NA         | 3.61      | 1          | 0.47      | 1          | NA        | NA         |
| NA        | NA         | NA        | NA         | NA        | NA         | 0.01      | 0          | 0.22      | 1          | NA        | NA         |
| NA        | NA         | NA        | NA         | NA        | NA         | 0.32      | 1          | 0.34      | 1          | NA        | NA         |
| NA        | NA         | NA        | NA         | NA        | NA         | 0.85      | 1          | 0.23      | 1          | NA        | NA         |
| NA        | NA         | NA        | NA         | NA        | NA         | 0.21      | 1          | 0.37      | 1          | NA        | NA         |
| NA        | NA         | NA        | NA         | NA        | NA         | 0.27      | 1          | 0.22      | 1          | NA        | NA         |
| NA        | NA         | NA        | NA         | NA        | NA         | 2.10      | 1          | 0.26      | 1          | NA        | NA         |
| NA        | NA         | NA        | NA         | NA        | NA         | 0.23      | 1          | 0.35      | 1          | NA        | NA         |
| NA        | NA         | NA        | NA         | NA        | NA         | 0.45      | 1          | 0.23      | 1          | NA        | NA         |
| NA        | NA         | NA        | NA         | NA        | NA         | 8.29      | 1          | 0.16      | 1          | NA        | NA         |
| NA        | NA         | NA        | NA         | NA        | NA         | 2.74      | 1          | 0.33      | 1          | NA        | NA         |
| NA        | NA         | NA        | NA         | NA        | NA         | 0.23      | 1          | 0.21      | 1          | NA        | NA         |
| NA        | NA         | NA        | NA         | NA        | NA         | 15.59     | 1          | 0.25      | 1          | NA        | NA         |
| NA        | NA         | NA        | NA         | NA        | NA         | 0.10      | 1          | 0.18      | 1          | NA        | NA         |
| NA        | NA         | NA        | NA         | NA        | NA         | 1.55      | 1          | 1.82      | 0          | NA        | NA         |
| NA        | NA         | NA        | NA         | NA        | NA         | 6.43      | 1          | 0.26      | 0          | NA        | NA         |
| NA        | NA         | NA        | NA         | NA        | NA         | 2.14      | 1          | 0.51      | 0          | NA        | NA         |
| NA        | NA         | NA        | NA         | NA        | NA         | 0.27      | 1          | 1.26      | 0          | NA        | NA         |
| NA        | NA         | NA        | NA         | NA        | NA         | 0.27      | 1          | 0.49      | 0          | NA        | NA         |
| NA        | NA         | NA        | NA         | NA        | NA         | 0.10      | 1          | 0.53      | 0          | NA        | NA         |
| NA        | NA         | NA        | NA         | NA        | NA         | 2.37      | 1          | 0.29      | 0          | NA        | NA         |
| NA        | NA         | NA        | NA         | NA        | NA         | 0.22      | 1          | 0.24      | 0          | NA        | NA         |
| NA        | NA         | NA        | NA         | NA        | NA         | 0.28      | 1          | 0.50      | 0          | NA        | NA         |
| NA        | NA         | NA        | NA         | NA        | NA         | 0.45      | 1          | 0.32      | 0          | NA        | NA         |
| NA        | NA         | NA        | NA         | NA        | NA         | 0.01      | 1          | 1.03      | 0          | NA        | NA         |
| NA        | NA         | NA        | NA         | NA        | NA         | 0.05      | 1          | 0.40      | 0          | NA        | NA         |
| NA        | NA         | NA        | NA         | NA        | NA         | 0.16      | 1          | 0.67      | 0          | NA        | NA         |

| time<br>A | leuko<br>A | time<br>A | leuko<br>A | time<br>B | leuko<br>B | time<br>C | leuko<br>C | time<br>D | leuko<br>D | time<br>E | leuko<br>E |
|-----------|------------|-----------|------------|-----------|------------|-----------|------------|-----------|------------|-----------|------------|
| NA        | NA         | NA        | NA         | NA        | NA         | 0.45      | 1          | 0.37      | 0          | NA        | NA         |
| NA        | NA         | NA        | NA         | NA        | NA         | 2.54      | 1          | 0.33      | 0          | NA        | NA         |
| NA        | NA         | NA        | NA         | NA        | NA         | 0.24      | 1          | 0.32      | 0          | NA        | NA         |
| NA        | NA         | NA        | NA         | NA        | NA         | 0.41      | 1          | 0.46      | 0          | NA        | NA         |
| NA        | NA         | NA        | NA         | NA        | NA         | 1.74      | 1          | 0.33      | 0          | NA        | NA         |
| NA        | NA         | NA        | NA         | NA        | NA         | 0.24      | 1          | 4.59      | 1          | NA        | NA         |
| NA        | NA         | NA        | NA         | NA        | NA         | 0.29      | 1          | 0.21      | 1          | NA        | NA         |
| NA        | NA         | NA        | NA         | NA        | NA         | 0.28      | 1          | 0.20      | 1          | NA        | NA         |
| NA        | NA         | NA        | NA         | NA        | NA         | 42.80     | 1          | 0.31      | 1          | NA        | NA         |
| NA        | NA         | NA        | NA         | NA        | NA         | 0.27      | 1          | 0.26      | 1          | NA        | NA         |
| NA        | NA         | NA        | NA         | NA        | NA         | 0.48      | 1          | 0.23      | 1          | NA        | NA         |
| NA        | NA         | NA        | NA         | NA        | NA         | 0.09      | 1          | 0.18      | 1          | NA        | NA         |
| NA        | NA         | NA        | NA         | NA        | NA         | 0.10      | 1          | 0.22      | 1          | NA        | NA         |
| NA        | NA         | NA        | NA         | NA        | NA         | 0.76      | 1          | 0.51      | 1          | NA        | NA         |
| NA        | NA         | NA        | NA         | NA        | NA         | 0.11      | 1          | 0.22      | 1          | NA        | NA         |
| NA        | NA         | NA        | NA         | NA        | NA         | 0.11      | 1          | 0.20      | 1          | NA        | NA         |
| NA        | NA         | NA        | NA         | NA        | NA         | 2.83      | 1          | 0.16      | 1          | NA        | NA         |
| NA        | NA         | NA        | NA         | NA        | NA         | 28.98     | 1          | 0.38      | 0          | NA        | NA         |
| NA        | NA         | NA        | NA         | NA        | NA         | 0.30      | 1          | 0.23      | 0          | NA        | NA         |
| NA        | NA         | NA        | NA         | NA        | NA         | 0.76      | 1          | 0.52      | 0          | NA        | NA         |
| NA        | NA         | NA        | NA         | NA        | NA         | 0.08      | 1          | 1.86      | 0          | NA        | NA         |
| NA        | NA         | NA        | NA         | NA        | NA         | 0.11      | 1          | 1.60      | 0          | NA        | NA         |
| NA        | NA         | NA        | NA         | NA        | NA         | 0.21      | 1          | 0.75      | 0          | NA        | NA         |
| NA        | NA         | NA        | NA         | NA        | NA         | 0.09      | 1          | 1.78      | 0          | NA        | NA         |
| NA        | NA         | NA        | NA         | NA        | NA         | 0.11      | 1          | 0.63      | 0          | NA        | NA         |
| NA        | NA         | NA        | NA         | NA        | NA         | 0.21      | 1          | 14.34     | 1          | NA        | NA         |
| NA        | NA         | NA        | NA         | NA        | NA         | 0.20      | 1          | 0.21      | 1          | NA        | NA         |
| NA        | NA         | NA        | NA         | NA        | NA         | 0.22      | 1          | 0.18      | 1          | NA        | NA         |
| NA        | NA         | NA        | NA         | NA        | NA         | 0.20      | 1          | 0.24      | 1          | NA        | NA         |
| NA        | NA         | NA        | NA         | NA        | NA         | 0.35      | 1          | 0.20      | 1          | NA        | NA         |
| NA        | NA         | NA        | NA         | NA        | NA         | 0.28      | 1          | 0.19      | 1          | NA        | NA         |
| NA        | NA         | NA        | NA         | NA        | NA         | 0.24      | 1          | 0.23      | 1          | NA        | NA         |
| NA        | NA         | NA        | NA         | NA        | NA         | 0.25      | 1          | 0.20      | 1          | NA        | NA         |
| NA        | NA         | NA        | NA         | NA        | NA         | 0.10      | 1          | 0.18      | 1          | NA        | NA         |
| NA        | NA         | NA        | NA         | NA        | NA         | 0.11      | 1          | 0.31      | 1          | NA        | NA         |
| NA        | NA         | NA        | NA         | NA        | NA         | 0.08      | 1          | 0.20      | 1          | NA        | NA         |
| NA        | NA         | NA        | NA         | NA        | NA         | 0.11      | 1          | 0.18      | 1          | NA        | NA         |
| NA        | NA         | NA        | NA         | NA        | NA         | 0.22      | 1          | 0.26      | 1          | NA        | NA         |
| NA        | NA         | NA        | NA         | NA        | NA         | 0.29      | 1          | 4.48      | 0          | NA        | NA         |
| NA        | NA         | NA        | NA         | NA        | NA         | 0.29      | 1          | 0.97      | 0          | NA        | NA         |
| NA        | NA         | NA        | NA         | NA        | NA         | 0.38      | 1          | 0.52      | 0          | NA        | NA         |
| NA        | NA         | NA        | NA         | NA        | NA         | 0.29      | 1          | 2.54      | 0          | NA        | NA         |
| NA        | NA         | NA        | NA         | NA        | NA         | 0.26      | 1          | 0.85      | 0          | NA        | NA         |
| NA        | NA         | NA        | NA         | NA        | NA         | 0.24      | 1          | 1.43      | 0          | NA        | NA         |
| NA        | NA         | NA        | NA         | NA        | NA         | 0.29      | 1          | 0.51      | 0          | NA        | NA         |
| NA        | NA         | NA        | NA         | NA        | NA         | 0.25      | 1          | 0.50      | 0          | NA        | NA         |
| NA        | NA         | NA        | NA         | NA        | NA         | 0.23      | 1          | 0.55      | 0          | NA        | NA         |
| NA        | NA         | NA        | NA         | NA        | NA         | 0.20      | 1          | 0.32      | 0          | NA        | NA         |
| NA        | NA         | NA        | NA         | NA        | NA         | 0.88      | 1          | 3.67      | 1          | NA        | NA         |
| NA        | NA         | NA        | NA         | NA        | NA         | 0.45      | 1          | 0.36      | 1          | NA        | NA         |
| NA        | NA         | NA        | NA         | NA        | NA         | 0.24      | 1          | 2.69      | 1          | NA        | NA         |

| time<br>A | leuko<br>A | time<br>A | leuko<br>A | time<br>B | leuko<br>B | time<br>C | leuko<br>C | time<br>D | leuko<br>D | time<br>E | leuko<br>E |
|-----------|------------|-----------|------------|-----------|------------|-----------|------------|-----------|------------|-----------|------------|
| NA        | NA         | NA        | NA         | NA        | NA         | 0.32      | 1          | 0.37      | 1          | NA        | NA         |
| NA        | NA         | NA        | NA         | NA        | NA         | 0.27      | 1          | 0.30      | 1          | NA        | NA         |
| NA        | NA         | NA        | NA         | NA        | NA         | 0.37      | 1          | 0.41      | 1          | NA        | NA         |
| NA        | NA         | NA        | NA         | NA        | NA         | 1.49      | 1          | 0.36      | 1          | NA        | NA         |
| NA        | NA         | NA        | NA         | NA        | NA         | 0.23      | 1          | 0.40      | 1          | NA        | NA         |
| NA        | NA         | NA        | NA         | NA        | NA         | 0.26      | 1          | 0.24      | 1          | NA        | NA         |
| NA        | NA         | NA        | NA         | NA        | NA         | 0.19      | 1          | 0.21      | 1          | NA        | NA         |
| NA        | NA         | NA        | NA         | NA        | NA         | 0.22      | 1          | 0.76      | 0          | NA        | NA         |
| NA        | NA         | NA        | NA         | NA        | NA         | 0.21      | 1          | 0.82      | 0          | NA        | NA         |
| NA        | NA         | NA        | NA         | NA        | NA         | 0.36      | 1          | 0.43      | 0          | NA        | NA         |
| NA        | NA         | NA        | NA         | NA        | NA         | 0.19      | 1          | 1.15      | 0          | NA        | NA         |
| NA        | NA         | NA        | NA         | NA        | NA         | 0.23      | 1          | 0.36      | 0          | NA        | NA         |
| NA        | NA         | NA        | NA         | NA        | NA         | 0.50      | 1          | 0.80      | 0          | NA        | NA         |
| NA        | NA         | NA        | NA         | NA        | NA         | 0.20      | 1          | 0.31      | 0          | NA        | NA         |
| NA        | NA         | NA        | NA         | NA        | NA         | 0.20      | 1          | 0.33      | 0          | NA        | NA         |
| NA        | NA         | NA        | NA         | NA        | NA         | 0.21      | 1          | 0.38      | 0          | NA        | NA         |
| NA        | NA         | NA        | NA         | NA        | NA         | 0.23      | 1          | 0.30      | 0          | NA        | NA         |
| NA        | NA         | NA        | NA         | NA        | NA         | 0.20      | 1          | 1.30      | 0          | NA        | NA         |
| NA        | NA         | NA        | NA         | NA        | NA         | 0.27      | 1          | NA        | NA         | NA        | NA         |
| NA        | NA         | NA        | NA         | NA        | NA         | 0.25      | 1          | NA        | NA         | NA        | NA         |
| NA        | NA         | NA        | NA         | NA        | NA         | 0.22      | 1          | NA        | NA         | NA        | NA         |
| NA        | NA         | NA        | NA         | NA        | NA         | 0.25      | 1          | NA        | NA         | NA        | NA         |
| NA        | NA         | NA        | NA         | NA        | NA         | 0.26      | 1          | NA        | NA         | NA        | NA         |
| NA        | NA         | NA        | NA         | NA        | NA         | 0.25      | 1          | NA        | NA         | NA        | NA         |
| NA        | NA         | NA        | NA         | NA        | NA         | 0.27      | 1          | NA        | NA         | NA        | NA         |
| NA        | NA         | NA        | NA         | NA        | NA         | 0.37      | 1          | NA        | NA         | NA        | NA         |
| NA        | NA         | NA        | NA         | NA        | NA         | 0.26      | 1          | NA        | NA         | NA        | NA         |
| NA        | NA         | NA        | NA         | NA        | NA         | 0.27      | 1          | NA        | NA         | NA        | NA         |
| NA        | NA         | NA        | NA         | NA        | NA         | 0.08      | 1          | NA        | NA         | NA        | NA         |
| NA        | NA         | NA        | NA         | NA        | NA         | 0.15      | 1          | NA        | NA         | NA        | NA         |
| NA        | NA         | NA        | NA         | NA        | NA         | 0.27      | 1          | NA        | NA         | NA        | NA         |
| NA        | NA         | NA        | NA         | NA        | NA         | 0.08      | 1          | NA        | NA         | NA        | NA         |
| NA        | NA         | NA        | NA         | NA        | NA         | 0.20      | 1          | NA        | NA         | NA        | NA         |
| NA        | NA         | NA        | NA         | NA        | NA         | 0.27      | 1          | NA        | NA         | NA        | NA         |
| NA        | NA         | NA        | NA         | NA        | NA         | 0.08      | 1          | NA        | NA         | NA        | NA         |
| NA        | NA         | NA        | NA         | NA        | NA         | 0.17      | 1          | NA        | NA         | NA        | NA         |
| NA        | NA         | NA        | NA         | NA        | NA         | 0.26      | 1          | NA        | NA         | NA        | NA         |
| NA        | NA         | NA        | NA         | NA        | NA         | 0.26      | 1          | NA        | NA         | NA        | NA         |
| NA        | NA         | NA        | NA         | NA        | NA         | 0.25      | 1          | NA        | NA         | NA        | NA         |
| NA        | NA         | NA        | NA         | NA        | NA         | 0.25      | 1          | NA        | NA         | NA        | NA         |
| NA        | NA         | NA        | NA         | NA        | NA         | 0.25      | 1          | NA        | NA         | NA        | NA         |
| NA        | NA         | NA        | NA         | NA        | NA         | 0.89      | 1          | NA        | NA         | NA        | NA         |
| NA        | NA         | NA        | NA         | NA        | NA         | 0.12      | 1          | NA        | NA         | NA        | NA         |
| NA        | NA         | NA        | NA         | NA        | NA         | 0.16      | 1          | NA        | NA         | NA        | NA         |
| NA        | NA         | NA        | NA         | NA        | NA         | 0.24      | 1          | NA        | NA         | NA        | NA         |
| NA        | NA         | NA        | NA         | NA        | NA         | 0.23      | 1          | NA        | NA         | NA        | NA         |
| NA        | NA         | NA        | NA         | NA        | NA         | 0.23      | 1          | NA        | NA         | NA        | NA         |
| NA        | NA         | NA        | NA         | NA        | NA         | 0.47      | 1          | NA        | NA         | NA        | NA         |
| NA        | NA         | NA        | NA         | NA        | NA         | 0.21      | 1          | NA        | NA         | NA        | NA         |
| NA        | NA         | NA        | NA         | NA        | NA         | 0.22      | 1          | NA        | NA         | NA        | NA         |
| NA        | NA         | NA        | NA         | NA        | NA         | 0.25      | 1          | NA        | NA         | NA        | NA         |

| time<br>A | leuko<br>A | time<br>A | leuko<br>A | time<br>B | leuko<br>B | time<br>C | leuko<br>C | time<br>D | leuko<br>D | time<br>E | leuko<br>E |
|-----------|------------|-----------|------------|-----------|------------|-----------|------------|-----------|------------|-----------|------------|
| NA        | NA         | NA        | NA         | NA        | NA         | 0.24      | 1          | NA        | NA         | NA        | NA         |
| NA        | NA         | NA        | NA         | NA        | NA         | 0.31      | 1          | NA        | NA         | NA        | NA         |
| NA        | NA         | NA        | NA         | NA        | NA         | 0.26      | 1          | NA        | NA         | NA        | NA         |
| NA        | NA         | NA        | NA         | NA        | NA         | 0.22      | 1          | NA        | NA         | NA        | NA         |
| NA        | NA         | NA        | NA         | NA        | NA         | 0.20      | 1          | NA        | NA         | NA        | NA         |
| NA        | NA         | NA        | NA         | NA        | NA         | 0.23      | 1          | NA        | NA         | NA        | NA         |
| NA        | NA         | NA        | NA         | NA        | NA         | 0.25      | 1          | NA        | NA         | NA        | NA         |
| NA        | NA         | NA        | NA         | NA        | NA         | 0.27      | 1          | NA        | NA         | NA        | NA         |
| NA        | NA         | NA        | NA         | NA        | NA         | 0.24      | 1          | NA        | NA         | NA        | NA         |
| NA        | NA         | NA        | NA         | NA        | NA         | 0.33      | 1          | NA        | NA         | NA        | NA         |
| NA        | NA         | NA        | NA         | NA        | NA         | 0.39      | 1          | NA        | NA         | NA        | NA         |
| NA        | NA         | NA        | NA         | NA        | NA         | 0.79      | 1          | NA        | NA         | NA        | NA         |
| NA        | NA         | NA        | NA         | NA        | NA         | 0.22      | 1          | NA        | NA         | NA        | NA         |
| NA        | NA         | NA        | NA         | NA        | NA         | 0.24      | 1          | NA        | NA         | NA        | NA         |
| NA        | NA         | NA        | NA         | NA        | NA         | 0.25      | 1          | NA        | NA         | NA        | NA         |
| NA        | NA         | NA        | NA         | NA        | NA         | 0.62      | 1          | NA        | NA         | NA        | NA         |
| NA        | NA         | NA        | NA         | NA        | NA         | 0.65      | 1          | NA        | NA         | NA        | NA         |
| NA        | NA         | NA        | NA         | NA        | NA         | 0.50      | 1          | NA        | NA         | NA        | NA         |
| NA        | NA         | NA        | NA         | NA        | NA         | 0.32      | 1          | NA        | NA         | NA        | NA         |
| NA        | NA         | NA        | NA         | NA        | NA         | 0.24      | 1          | NA        | NA         | NA        | NA         |
| NA        | NA         | NA        | NA         | NA        | NA         | 1.85      | 1          | NA        | NA         | NA        | NA         |
| NA        | NA         | NA        | NA         | NA        | NA         | 1.00      | 1          | NA        | NA         | NA        | NA         |
| NA        | NA         | NA        | NA         | NA        | NA         | 0.16      | 1          | NA        | NA         | NA        | NA         |
| NA        | NA         | NA        | NA         | NA        | NA         | 0.21      | 1          | NA        | NA         | NA        | NA         |
| NA        | NA         | NA        | NA         | NA        | NA         | 1.67      | 1          | NA        | NA         | NA        | NA         |
| NA        | NA         | NA        | NA         | NA        | NA         | 0.23      | 1          | NA        | NA         | NA        | NA         |
| NA        | NA         | NA        | NA         | NA        | NA         | 0.22      | 1          | NA        | NA         | NA        | NA         |
| NA        | NA         | NA        | NA         | NA        | NA         | 0.20      | 1          | NA        | NA         | NA        | NA         |
| NA        | NA         | NA        | NA         | NA        | NA         | 0.19      | 1          | NA        | NA         | NA        | NA         |
| NA        | NA         | NA        | NA         | NA        | NA         | 0.20      | 1          | NA        | NA         | NA        | NA         |
| NA        | NA         | NA        | NA         | NA        | NA         | 0.21      | 1          | NA        | NA         | NA        | NA         |
| NA        | NA         | NA        | NA         | NA        | NA         | 0.18      | 1          | NA        | NA         | NA        | NA         |
| NA        | NA         | NA        | NA         | NA        | NA         | 0.20      | 1          | NA        | NA         | NA        | NA         |
| NA        | NA         | NA        | NA         | NA        | NA         | 0.20      | 1          | NA        | NA         | NA        | NA         |
| NA        | NA         | NA        | NA         | NA        | NA         | 0.24      | 1          | NA        | NA         | NA        | NA         |
| NA        | NA         | NA        | NA         | NA        | NA         | 0.25      | 1          | NA        | NA         | NA        | NA         |
| NA        | NA         | NA        | NA         | NA        | NA         | 0.22      | 1          | NA        | NA         | NA        | NA         |
| NA        | NA         | NA        | NA         | NA        | NA         | 0.23      | 1          | NA        | NA         | NA        | NA         |
| NA        | NA         | NA        | NA         | NA        | NA         | 0.48      | 1          | NA        | NA         | NA        | NA         |
| NA        | NA         | NA        | NA         | NA        | NA         | 0.23      | 1          | NA        | NA         | NA        | NA         |
| NA        | NA         | NA        | NA         | NA        | NA         | 0.26      | 1          | NA        | NA         | NA        | NA         |
| NA        | NA         | NA        | NA         | NA        | NA         | 0.33      | 1          | NA        | NA         | NA        | NA         |
| NA        | NA         | NA        | NA         | NA        | NA         | 0.46      | 1          | NA        | NA         | NA        | NA         |
| NA        | NA         | NA        | NA         | NA        | NA         | 0.26      | 1          | NA        | NA         | NA        | NA         |
| NA        | NA         | NA        | NA         | NA        | NA         | 0.22      | 1          | NA        | NA         | NA        | NA         |
| NA        | NA         | NA        | NA         | NA        | NA         | 0.24      | 1          | NA        | NA         | NA        | NA         |
| NA        | NA         | NA        | NA         | NA        | NA         | 0.22      | 1          | NA        | NA         | NA        | NA         |
| NA        | NA         | NA        | NA         | NA        | NA         | 0.23      | 1          | NA        | NA         | NA        | NA         |
| NA        | NA         | NA        | NA         | NA        | NA         | 0.21      | 1          | NA        | NA         | NA        | NA         |
| NA        | NA         | NA        | NA         | NA        | NA         | 0.21      | 1          | NA        | NA         | NA        | NA         |
| NA        | NA         | NA        | NA         | NA        | NA         | 0.84      | 1          | NA        | NA         | NA        | NA         |

| time<br>A | leuko<br>A | time<br>A | leuko<br>A | time<br>B | leuko<br>B | time<br>C | leuko<br>C | time<br>D | leuko<br>D | time<br>E | leuko<br>E |
|-----------|------------|-----------|------------|-----------|------------|-----------|------------|-----------|------------|-----------|------------|
| NA        | NA         | NA        | NA         | NA        | NA         | 0.28      | 1          | NA        | NA         | NA        | NA         |
| NA        | NA         | NA        | NA         | NA        | NA         | 0.11      | 1          | NA        | NA         | NA        | NA         |
| NA        | NA         | NA        | NA         | NA        | NA         | 0.10      | 1          | NA        | NA         | NA        | NA         |
| NA        | NA         | NA        | NA         | NA        | NA         | 0.22      | 1          | NA        | NA         | NA        | NA         |
| NA        | NA         | NA        | NA         | NA        | NA         | 0.09      | 1          | NA        | NA         | NA        | NA         |
| NA        | NA         | NA        | NA         | NA        | NA         | 0.12      | 1          | NA        | NA         | NA        | NA         |
| NA        | NA         | NA        | NA         | NA        | NA         | 0.20      | 1          | NA        | NA         | NA        | NA         |
| NA        | NA         | NA        | NA         | NA        | NA         | 0.07      | 1          | NA        | NA         | NA        | NA         |
| NA        | NA         | NA        | NA         | NA        | NA         | 0.23      | 1          | NA        | NA         | NA        | NA         |
| NA        | NA         | NA        | NA         | NA        | NA         | 0.22      | 1          | NA        | NA         | NA        | NA         |
| NA        | NA         | NA        | NA         | NA        | NA         | 0.27      | 1          | NA        | NA         | NA        | NA         |
| NA        | NA         | NA        | NA         | NA        | NA         | 0.21      | 1          | NA        | NA         | NA        | NA         |
| NA        | NA         | NA        | NA         | NA        | NA         | 0.20      | 1          | NA        | NA         | NA        | NA         |
| NA        | NA         | NA        | NA         | NA        | NA         | 0.21      | 1          | NA        | NA         | NA        | NA         |
| NA        | NA         | NA        | NA         | NA        | NA         | 0.22      | 1          | NA        | NA         | NA        | NA         |
| NA        | NA         | NA        | NA         | NA        | NA         | 0.22      | 1          | NA        | NA         | NA        | NA         |
| NA        | NA         | NA        | NA         | NA        | NA         | 0.18      | 1          | NA        | NA         | NA        | NA         |
| NA        | NA         | NA        | NA         | NA        | NA         | 0.22      | 1          | NA        | NA         | NA        | NA         |
| NA        | NA         | NA        | NA         | NA        | NA         | 0.22      | 1          | NA        | NA         | NA        | NA         |
| NA        | NA         | NA        | NA         | NA        | NA         | 0.21      | 1          | NA        | NA         | NA        | NA         |
| NA        | NA         | NA        | NA         | NA        | NA         | 0.22      | 1          | NA        | NA         | NA        | NA         |
| NA        | NA         | NA        | NA         | NA        | NA         | 0.21      | 1          | NA        | NA         | NA        | NA         |
| NA        | NA         | NA        | NA         | NA        | NA         | 0.23      | 1          | NA        | NA         | NA        | NA         |
| NA        | NA         | NA        | NA         | NA        | NA         | 0.23      | 1          | NA        | NA         | NA        | NA         |
| NA        | NA         | NA        | NA         | NA        | NA         | 0.22      | 1          | NA        | NA         | NA        | NA         |
| NA        | NA         | NA        | NA         | NA        | NA         | 0.21      | 1          | NA        | NA         | NA        | NA         |
| NA        | NA         | NA        | NA         | NA        | NA         | 0.23      | 1          | NA        | NA         | NA        | NA         |
| NA        | NA         | NA        | NA         | NA        | NA         | 0.23      | 1          | NA        | NA         | NA        | NA         |
| NA        | NA         | NA        | NA         | NA        | NA         | 0.23      | 1          | NA        | NA         | NA        | NA         |
| NA        | NA         | NA        | NA         | NA        | NA         | 0.23      | 1          | NA        | NA         | NA        | NA         |
| NA        | NA         | NA        | NA         | NA        | NA         | 0.23      | 1          | NA        | NA         | NA        | NA         |
| NA        | NA         | NA        | NA         | NA        | NA         | 0.23      | 1          | NA        | NA         | NA        | NA         |
| NA        | NA         | NA        | NA         | NA        | NA         | 0.25      | 1          | NA        | NA         | NA        | NA         |
| NA        | NA         | NA        | NA         | NA        | NA         | 0.27      | 1          | NA        | NA         | NA        | NA         |
| NA        | NA         | NA        | NA         | NA        | NA         | 0.26      | 1          | NA        | NA         | NA        | NA         |
| NA        | NA         | NA        | NA         | NA        | NA         | 0.25      | 1          | NA        | NA         | NA        | NA         |
| NA        | NA         | NA        | NA         | NA        | NA         | 0.61      | 1          | NA        | NA         | NA        | NA         |
| NA        | NA         | NA        | NA         | NA        | NA         | 0.18      | 1          | NA        | NA         | NA        | NA         |
| NA        | NA         | NA        | NA         | NA        | NA         | 0.23      | 1          | NA        | NA         | NA        | NA         |
| NA        | NA         | NA        | NA         | NA        | NA         | 0.21      | 1          | NA        | NA         | NA        | NA         |
| NA        | NA         | NA        | NA         | NA        | NA         | 0.23      | 1          | NA        | NA         | NA        | NA         |
| NA        | NA         | NA        | NA         | NA        | NA         | 0.21      | 1          | NA        | NA         | NA        | NA         |
| NA        | NA         | NA        | NA         | NA        | NA         | 0.23      | 1          | NA        | NA         | NA        | NA         |
| NA        | NA         | NA        | NA         | NA        | NA         | 0.21      | 1          | NA        | NA         | NA        | NA         |
| NA        | NA         | NA        | NA         | NA        | NA         | 0.24      | 1          | NA        | NA         | NA        | NA         |
| NA        | NA         | NA        | NA         | NA        | NA         | 0.20      | 1          | NA        | NA         | NA        | NA         |
| NA        | NA         | NA        | NA         | NA        | NA         | 0.22      | 1          | NA        | NA         | NA        | NA         |
| NA        | NA         | NA        | NA         | NA        | NA         | 0.22      | 1          | NA        | NA         | NA        | NA         |
| NA        | NA         | NA        | NA         | NA        | NA         | 0.10      | 1          | NA        | NA         | NA        | NA         |
| NA        | NA         | NA        | NA         | NA        | NA         | 0.12      | 0          | NA        | NA         | NA        | NA         |
| NA        | NA         | NA        | NA         | NA        | NA         | 0.24      | 0          | NA        | NA         | NA        | NA         |
| NA        | NA         | NA        | NA         | NA        | NA         | 0.17      | 1          | NA        | NA         | NA        | NA         |
| NA        | NA         | NA        | NA         | NA        | NA         | 0.25      | 1          | NA        | NA         | NA        | NA         |

---

| time | leuko | time | leuko | time | leuko | time | leuko | time | leuko | time | leuko |
|------|-------|------|-------|------|-------|------|-------|------|-------|------|-------|
| A    | A     | A    | A     | B    | B     | C    | C     | D    | D     | E    | E     |
| NA   | NA    | NA   | NA    | NA   | NA    | 0.19 | 1     | NA   | NA    | NA   | NA    |

---

## 1.7 SL:13

Table 7: Raw data of TBS SL:13.

| time<br>A | leuko<br>A | time<br>A | leuko<br>A | time<br>B | leuko<br>B | time<br>C | leuko<br>C | time<br>D | leuko<br>D | time<br>E | leuko<br>E |
|-----------|------------|-----------|------------|-----------|------------|-----------|------------|-----------|------------|-----------|------------|
| 0.00      | 1          | 0.00      | 1          | 0.00      | 1          | 0.00      | 1          | 0.00      | 1          | 0.00      | 1          |
| 0.69      | 1          | 0.25      | 1          | 0.35      | 1          | 0.22      | 1          | 0.22      | 1          | 0.30      | 1          |
| 0.22      | 1          | 0.22      | 1          | 0.27      | 1          | 0.22      | 1          | 0.22      | 1          | 2.44      | 0          |
| 0.08      | 1          | 0.22      | 1          | 0.60      | 1          | 0.23      | 1          | 0.41      | 1          | 0.65      | 0          |
| 0.09      | 1          | 0.21      | 1          | 0.28      | 1          | 0.21      | 1          | 0.24      | 1          | 0.31      | 0          |
| 0.19      | 1          | 0.23      | 1          | 0.24      | 1          | 0.22      | 1          | 0.31      | 1          | 5.13      | 0          |
| 0.19      | 1          | 0.19      | 1          | 0.36      | 1          | 0.20      | 1          | 1.44      | 1          | 1.19      | 0          |
| 0.18      | 1          | 1.29      | 0          | 0.23      | 1          | 0.44      | 1          | 0.39      | 1          | 1.18      | 0          |
| 0.17      | 1          | 0.27      | 0          | 6.09      | 0          | 0.01      | 1          | 0.19      | 1          | 0.31      | 0          |
| 1.04      | 0          | 0.26      | 0          | 1.76      | 0          | 0.18      | 1          | 0.30      | 1          | 0.84      | 0          |
| 0.45      | 0          | 0.59      | 0          | 0.33      | 0          | 0.19      | 1          | 0.23      | 1          | 0.31      | 0          |
| 1.77      | 0          | 0.25      | 0          | 0.43      | 0          | 0.07      | 1          | 0.23      | 1          | 0.21      | 0          |
| 1.37      | 0          | 0.30      | 0          | 0.75      | 0          | 2.70      | 0          | 0.28      | 1          | 0.48      | 0          |
| 1.99      | 0          | 3.78      | 1          | 9.33      | 0          | 0.26      | 0          | 0.17      | 1          | 1.66      | 0          |
| 1.16      | 0          | 0.24      | 1          | 0.38      | 0          | 1.62      | 0          | 2.04      | 0          | 0.35      | 0          |
| 2.04      | 1          | 0.16      | 1          | 0.29      | 0          | 0.96      | 0          | 0.35      | 0          | 0.38      | 0          |
| 0.15      | 1          | 0.16      | 1          | 1.74      | 1          | 1.72      | 0          | 3.31      | 0          | 0.87      | 0          |
| 0.12      | 1          | 0.19      | 1          | 0.27      | 1          | 0.26      | 0          | 0.59      | 0          | 11.42     | 1          |
| 0.23      | 1          | 0.32      | 1          | 0.38      | 1          | 0.58      | 0          | 6.59      | 0          | 0.28      | 1          |
| 0.21      | 1          | 0.18      | 1          | 0.22      | 1          | 0.36      | 0          | 0.89      | 0          | 0.08      | 1          |
| 0.16      | 1          | 0.21      | 1          | 9.54      | 0          | 0.71      | 0          | 7.43      | 1          | 0.14      | 1          |
| 0.16      | 1          | 0.35      | 1          | 0.34      | 0          | 0.41      | 0          | 0.21      | 1          | 0.26      | 1          |
| 0.08      | 1          | 0.70      | 0          | 0.41      | 0          | 0.48      | 0          | 0.20      | 1          | 0.46      | 1          |
| 0.10      | 1          | 0.25      | 0          | 0.61      | 0          | 0.37      | 0          | 0.21      | 1          | 4.49      | 0          |
| 0.17      | 1          | 0.25      | 0          | 1.02      | 1          | 0.53      | 0          | 0.18      | 1          | 0.25      | 0          |
| 1.00      | 0          | 0.27      | 0          | 0.23      | 1          | 0.53      | 0          | 0.22      | 1          | 0.58      | 0          |
| 0.24      | 0          | 0.21      | 0          | 0.24      | 1          | 1.04      | 0          | 0.17      | 1          | 0.24      | 0          |
| 0.20      | 0          | 3.14      | 1          | 0.69      | 1          | 0.84      | 0          | 0.20      | 1          | 0.53      | 0          |
| 1.41      | 0          | 0.23      | 1          | 0.26      | 1          | 0.37      | 0          | 0.19      | 1          | 0.23      | 0          |
| 0.29      | 0          | 0.20      | 1          | 0.22      | 1          | 1.68      | 0          | 0.18      | 1          | 0.25      | 0          |
| 0.26      | 0          | 0.18      | 1          | 0.21      | 1          | 0.27      | 0          | 0.41      | 1          | 1.96      | 0          |
| 0.56      | 0          | 0.29      | 1          | 0.57      | 0          | 0.59      | 0          | 0.58      | 1          | 0.61      | 0          |
| 0.24      | 0          | 0.15      | 1          | 0.98      | 0          | 0.25      | 0          | 0.21      | 1          | 0.74      | 0          |
| 0.20      | 0          | 0.16      | 1          | 0.52      | 0          | 0.27      | 0          | 0.22      | 1          | 0.28      | 0          |
| 0.24      | 0          | 0.19      | 1          | 0.62      | 0          | 0.32      | 0          | 0.18      | 1          | 0.26      | 0          |
| 3.49      | 1          | 0.37      | 0          | 0.27      | 0          | 0.47      | 0          | 4.55      | 0          | 0.28      | 0          |
| 0.24      | 1          | 0.25      | 0          | 7.57      | 1          | 4.58      | 1          | 5.10      | 0          | 1.50      | 0          |
| 0.37      | 1          | 0.20      | 0          | 0.29      | 1          | 0.23      | 1          | 1.91      | 0          | 0.30      | 0          |
| 0.23      | 1          | 0.22      | 0          | 0.24      | 1          | 0.22      | 1          | 0.78      | 0          | 0.77      | 0          |
| 0.20      | 1          | 0.25      | 0          | 0.21      | 1          | 0.02      | 1          | 1.77      | 0          | 1.42      | 0          |
| 0.21      | 1          | 0.21      | 0          | 2.17      | 0          | 0.19      | 1          | 4.11      | 0          | 1.56      | 0          |
| 9.37      | 1          | 0.40      | 0          | 0.40      | 0          | 0.35      | 1          | 3.72      | 0          | 1.02      | 0          |
| 0.25      | 1          | 0.24      | 0          | 1.34      | 0          | 0.28      | 1          | 3.37      | 0          | 0.30      | 0          |
| 0.17      | 1          | 0.18      | 0          | 0.67      | 0          | 2.05      | 0          | 9.79      | 1          | 0.86      | 0          |
| 0.17      | 1          | 1.81      | 1          | 1.28      | 0          | 0.29      | 0          | 0.24      | 1          | 11.41     | 1          |
| 0.21      | 1          | 2.60      | 0          | 1.33      | 0          | 1.65      | 0          | 0.22      | 1          | 0.25      | 1          |
| 0.17      | 1          | 0.20      | 0          | 0.33      | 0          | 0.61      | 0          | 0.17      | 1          | 0.31      | 1          |
| 0.21      | 1          | 0.20      | 0          | 10.82     | 0          | 0.25      | 0          | 0.20      | 1          | 8.29      | 0          |



| time<br>A | leuko<br>A | time<br>A | leuko<br>A | time<br>B | leuko<br>B | time<br>C | leuko<br>C | time<br>D | leuko<br>D | time<br>E | leuko<br>E |
|-----------|------------|-----------|------------|-----------|------------|-----------|------------|-----------|------------|-----------|------------|
| 2.03      | 0          | 0.21      | 0          | 7.41      | 1          | 1.52      | 0          | 0.20      | 1          | 2.86      | 0          |
| 0.27      | 0          | 0.19      | 0          | 0.29      | 1          | 0.29      | 0          | 0.24      | 1          | 2.20      | 0          |
| 0.22      | 0          | 0.19      | 0          | 0.31      | 1          | 1.98      | 0          | 0.17      | 1          | 0.29      | 0          |
| 0.20      | 0          | 0.30      | 0          | 0.45      | 1          | 0.34      | 0          | 0.27      | 1          | 0.53      | 0          |
| 0.29      | 0          | 1.54      | 1          | 0.25      | 1          | 0.83      | 0          | 0.23      | 1          | 0.69      | 0          |
| 0.30      | 0          | 0.23      | 1          | 0.30      | 1          | 1.14      | 0          | 0.94      | 1          | 1.37      | 0          |
| 0.21      | 0          | 0.20      | 1          | 8.90      | 0          | 0.46      | 0          | 0.23      | 1          | 0.48      | 0          |
| 0.19      | 0          | 0.16      | 1          | 0.47      | 0          | 0.39      | 0          | 0.20      | 1          | 0.29      | 0          |
| 0.17      | 0          | 0.18      | 1          | 0.92      | 0          | 0.44      | 0          | 3.07      | 0          | 0.25      | 0          |
| 0.34      | 0          | 0.18      | 1          | 0.93      | 0          | 3.63      | 1          | 0.75      | 0          | 6.15      | 1          |
| 0.95      | 0          | 0.18      | 1          | 0.42      | 0          | 0.22      | 1          | 2.38      | 0          | 0.24      | 1          |
| 0.90      | 0          | 0.40      | 0          | 1.15      | 0          | 0.23      | 1          | 1.49      | 0          | 0.30      | 1          |
| 2.05      | 0          | 0.19      | 0          | 0.85      | 0          | 0.26      | 1          | 2.04      | 0          | 3.15      | 0          |
| 0.24      | 0          | 0.19      | 0          | 0.56      | 0          | 0.19      | 1          | 5.09      | 0          | 0.79      | 0          |
| 0.21      | 0          | 0.22      | 0          | 0.84      | 0          | 0.23      | 1          | 2.15      | 0          | 0.28      | 0          |
| 7.23      | 1          | 0.21      | 0          | 1.96      | 1          | 0.07      | 1          | 3.73      | 0          | 2.59      | 0          |
| 0.31      | 1          | 0.18      | 0          | 0.30      | 1          | 0.12      | 1          | 14.71     | 1          | 0.30      | 0          |
| 0.20      | 1          | 0.23      | 0          | 0.26      | 1          | 0.07      | 1          | 0.45      | 1          | 0.23      | 0          |
| 0.21      | 1          | 0.18      | 0          | 0.23      | 1          | 7.65      | 0          | 0.64      | 1          | 0.60      | 0          |
| 0.20      | 1          | 0.14      | 0          | 9.10      | 0          | 1.24      | 0          | 0.67      | 1          | 0.26      | 0          |
| 0.24      | 1          | 0.26      | 0          | 0.44      | 0          | 1.19      | 0          | 0.44      | 1          | 1.40      | 0          |
| 0.21      | 1          | 0.28      | 0          | 0.96      | 0          | 4.51      | 1          | 0.26      | 1          | 0.29      | 0          |
| 0.28      | 1          | 0.24      | 0          | 0.36      | 0          | 0.23      | 1          | 0.21      | 1          | 0.45      | 0          |
| 2.83      | 0          | 0.22      | 0          | 0.49      | 0          | 0.24      | 1          | 0.19      | 1          | 0.88      | 0          |
| 0.24      | 0          | 0.32      | 0          | 0.69      | 0          | 0.44      | 1          | 0.23      | 1          | 0.30      | 0          |
| 0.19      | 0          | 0.19      | 0          | 0.37      | 0          | 0.18      | 1          | 0.21      | 1          | 0.75      | 0          |
| 0.25      | 0          | 0.20      | 0          | 0.51      | 0          | 0.21      | 1          | 0.70      | 1          | 0.93      | 0          |
| 1.33      | 0          | 11.19     | 1          | 0.65      | 0          | 0.01      | 1          | 0.22      | 1          | 1.72      | 0          |
| 0.85      | 0          | 0.30      | 1          | 0.36      | 0          | 0.18      | 1          | 0.20      | 1          | 1.25      | 0          |
| 4.20      | 1          | 0.27      | 1          | 4.41      | 1          | 2.83      | 0          | 4.13      | 0          | 0.60      | 0          |
| 0.26      | 1          | 2.91      | 0          | 0.27      | 1          | 0.69      | 0          | 0.22      | 0          | 0.91      | 0          |
| 0.10      | 1          | 0.24      | 0          | 0.23      | 1          | 0.91      | 0          | 1.14      | 0          | 0.30      | 0          |
| 0.10      | 1          | 0.21      | 0          | 0.44      | 1          | 0.42      | 0          | 6.33      | 0          | 6.99      | 1          |
| 0.20      | 1          | 0.25      | 0          | 0.27      | 1          | 0.42      | 0          | 0.44      | 0          | 0.26      | 1          |
| 0.18      | 1          | 0.47      | 0          | 0.21      | 1          | 1.14      | 0          | 2.43      | 0          | 0.25      | 1          |
| 0.17      | 1          | 0.26      | 0          | 7.40      | 0          | 0.71      | 0          | 6.68      | 0          | 3.91      | 0          |
| 0.18      | 1          | 0.20      | 0          | 0.43      | 0          | 3.77      | 0          | 1.48      | 0          | 3.32      | 0          |
| 0.66      | 0          | 0.20      | 0          | 0.42      | 0          | 0.51      | 0          | 1.20      | 0          | 1.61      | 0          |
| 0.22      | 0          | 0.22      | 0          | 0.66      | 0          | 7.57      | 1          | 21.86     | 1          | 1.49      | 0          |
| 0.21      | 0          | 0.37      | 0          | 0.43      | 0          | 0.24      | 1          | 0.19      | 1          | 0.26      | 0          |
| 0.19      | 0          | 0.23      | 0          | 0.37      | 0          | 0.01      | 1          | 0.17      | 1          | 0.78      | 0          |
| 0.44      | 0          | 0.19      | 0          | 0.37      | 0          | 0.27      | 1          | 0.19      | 1          | 0.45      | 0          |
| 1.86      | 0          | 0.26      | 0          | 1.84      | 0          | 0.23      | 1          | 0.15      | 1          | 0.53      | 0          |
| 5.86      | 1          | 0.31      | 0          | 0.50      | 0          | 0.27      | 1          | 0.36      | 1          | 0.26      | 0          |
| 0.23      | 1          | 0.22      | 0          | 0.35      | 0          | 0.68      | 1          | 0.19      | 1          | 0.25      | 0          |
| 0.23      | 1          | 5.78      | 1          | 0.32      | 0          | 2.53      | 0          | 0.18      | 1          | 1.97      | 0          |
| 0.19      | 1          | 0.26      | 1          | 0.98      | 0          | 1.15      | 0          | 0.19      | 1          | 0.58      | 0          |
| 0.22      | 1          | 0.19      | 1          | 0.72      | 0          | 0.63      | 0          | 0.18      | 1          | 0.76      | 0          |
| 2.93      | 0          | 0.18      | 1          | 0.47      | 0          | 1.79      | 0          | 0.24      | 1          | 0.72      | 0          |
| 0.28      | 0          | 0.77      | 0          | 1.27      | 1          | 2.78      | 0          | 0.21      | 1          | 1.89      | 0          |
| 0.21      | 0          | 0.28      | 0          | 0.25      | 1          | 1.58      | 0          | 0.31      | 1          | 0.33      | 0          |

| time<br>A | leuko<br>A | time<br>A | leuko<br>A | time<br>B | leuko<br>B | time<br>C | leuko<br>C | time<br>D | leuko<br>D | time<br>E | leuko<br>E |
|-----------|------------|-----------|------------|-----------|------------|-----------|------------|-----------|------------|-----------|------------|
| 0.22      | 0          | 0.28      | 0          | 0.51      | 1          | 5.30      | 1          | 0.27      | 1          | 0.22      | 0          |
| 0.21      | 0          | 0.23      | 0          | 0.24      | 1          | 0.23      | 1          | 0.31      | 1          | 0.23      | 0          |
| 0.20      | 0          | 0.22      | 0          | 0.46      | 1          | 0.23      | 1          | 0.48      | 1          | 0.98      | 0          |
| 0.20      | 0          | 0.31      | 0          | 0.40      | 1          | 0.61      | 1          | 0.32      | 1          | 0.31      | 0          |
| 0.19      | 0          | 4.51      | 1          | 0.29      | 1          | 1.60      | 0          | 0.22      | 1          | 0.30      | 0          |
| 0.20      | 0          | 0.23      | 1          | 0.26      | 1          | 0.30      | 0          | 1.20      | 0          | 0.77      | 0          |
| 0.18      | 0          | 0.21      | 1          | 14.17     | 0          | 0.26      | 0          | 0.26      | 0          | 0.28      | 0          |
| 0.22      | 0          | 0.26      | 1          | 0.48      | 0          | 3.13      | 0          | 0.45      | 0          | 0.45      | 0          |
| 3.93      | 1          | 0.22      | 1          | 0.59      | 0          | 0.54      | 0          | 1.07      | 0          | 1.62      | 0          |
| 0.13      | 1          | 1.65      | 0          | 0.41      | 0          | 0.87      | 0          | 0.24      | 0          | 8.96      | 1          |
| 0.11      | 1          | 0.26      | 0          | 0.55      | 0          | 7.04      | 1          | 1.42      | 0          | 0.24      | 1          |
| 0.21      | 1          | 0.23      | 0          | 0.57      | 0          | 0.22      | 1          | 0.96      | 0          | 0.31      | 1          |
| 0.21      | 1          | 0.29      | 0          | 0.41      | 0          | 0.34      | 1          | 0.26      | 0          | 0.27      | 1          |
| 0.20      | 1          | 0.19      | 0          | 0.86      | 0          | 0.31      | 1          | 0.97      | 0          | 0.25      | 1          |
| 0.19      | 1          | 0.21      | 0          | 0.37      | 0          | 0.24      | 1          | 2.78      | 0          | 0.25      | 1          |
| 2.64      | 0          | 0.21      | 0          | 0.29      | 0          | 0.22      | 1          | 0.49      | 0          | 0.24      | 1          |
| 0.25      | 0          | 0.26      | 0          | 0.54      | 0          | 0.06      | 1          | 0.68      | 0          | 0.24      | 1          |
| 0.45      | 0          | 0.23      | 0          | 0.59      | 0          | 0.24      | 1          | 1.74      | 0          | 4.59      | 0          |
| 0.50      | 0          | 0.41      | 0          | 5.28      | 0          | 0.06      | 1          | 0.63      | 0          | 0.27      | 0          |
| 0.68      | 0          | 1.89      | 1          | 0.43      | 0          | 0.13      | 1          | 0.29      | 0          | 0.23      | 0          |
| 0.28      | 0          | 0.26      | 1          | 0.29      | 0          | 0.07      | 1          | 0.37      | 0          | 2.92      | 0          |
| 0.23      | 0          | 0.22      | 1          | 0.23      | 0          | 0.17      | 1          | 0.33      | 0          | 0.94      | 0          |
| 0.21      | 0          | 0.42      | 0          | 0.93      | 1          | 0.21      | 1          | 1.54      | 0          | 2.72      | 0          |
| 0.18      | 0          | 0.24      | 0          | 0.29      | 1          | 0.21      | 1          | 0.46      | 0          | 0.35      | 0          |
| 0.21      | 0          | 0.29      | 0          | 0.24      | 1          | 0.24      | 1          | 0.58      | 0          | 0.71      | 0          |
| 0.82      | 0          | 0.20      | 0          | 0.35      | 1          | 0.32      | 1          | 9.31      | 1          | 0.70      | 0          |
| 7.29      | 1          | 0.20      | 0          | 0.25      | 1          | 1.86      | 0          | 0.21      | 1          | 0.78      | 0          |
| 0.38      | 1          | 0.20      | 0          | 0.31      | 1          | 1.14      | 0          | 0.23      | 1          | 1.36      | 0          |
| 0.24      | 1          | 3.60      | 1          | 0.23      | 1          | 0.56      | 0          | 0.24      | 1          | 0.57      | 0          |
| 0.23      | 1          | 0.22      | 1          | 0.23      | 1          | 1.95      | 0          | 0.31      | 1          | 0.25      | 0          |
| 0.21      | 1          | 0.16      | 1          | 0.22      | 1          | 0.29      | 0          | 0.19      | 1          | 1.05      | 0          |
| 0.22      | 1          | 0.17      | 1          | 7.39      | 1          | 0.62      | 0          | 0.21      | 1          | 0.28      | 0          |
| 0.18      | 1          | 0.18      | 1          | 0.28      | 1          | 0.40      | 0          | 0.19      | 1          | 0.23      | 0          |
| 0.20      | 1          | 0.18      | 1          | 0.47      | 1          | 0.31      | 0          | 0.18      | 1          | 7.12      | 1          |
| 0.18      | 1          | 0.17      | 1          | 0.24      | 1          | 0.84      | 0          | 0.16      | 1          | 0.27      | 1          |
| 0.20      | 1          | 0.15      | 1          | 0.21      | 1          | 0.29      | 0          | 0.18      | 1          | 0.28      | 1          |
| 0.20      | 1          | 0.17      | 1          | 0.21      | 1          | 1.75      | 0          | 0.20      | 1          | 0.28      | 1          |
| 6.90      | 0          | 0.14      | 1          | 0.28      | 1          | 1.18      | 0          | 0.17      | 1          | 3.87      | 0          |
| 0.26      | 0          | 0.42      | 0          | 0.22      | 1          | 1.83      | 0          | 0.18      | 1          | 0.26      | 0          |
| 0.17      | 0          | 0.27      | 0          | 0.28      | 1          | 0.34      | 0          | 3.64      | 0          | 0.22      | 0          |
| 0.15      | 0          | 0.26      | 0          | 0.22      | 1          | 1.07      | 0          | 3.24      | 0          | 0.42      | 0          |
| 0.21      | 0          | 0.23      | 0          | 0.21      | 1          | 1.03      | 0          | 14.87     | 0          | 0.23      | 0          |
| 0.20      | 0          | 0.20      | 0          | 0.18      | 1          | 3.96      | 1          | 5.88      | 0          | 0.54      | 0          |
| 0.19      | 0          | 0.19      | 0          | 0.26      | 1          | 0.23      | 1          | 7.69      | 1          | 2.51      | 0          |
| 0.17      | 0          | 0.19      | 0          | 0.21      | 1          | 0.07      | 1          | 0.18      | 1          | 0.26      | 0          |
| 0.20      | 0          | 0.25      | 0          | 0.21      | 1          | 0.13      | 1          | 0.18      | 1          | 0.46      | 0          |
| 0.19      | 0          | 0.22      | 0          | 6.96      | 0          | 0.23      | 1          | 0.24      | 1          | 0.93      | 0          |
| 0.21      | 0          | 0.22      | 0          | 0.34      | 0          | 0.26      | 1          | 0.17      | 1          | 0.88      | 0          |
| 0.21      | 0          | 1.81      | 1          | 0.35      | 0          | 0.23      | 1          | 0.18      | 1          | 0.56      | 0          |
| 0.21      | 0          | 0.22      | 1          | 3.27      | 0          | 0.29      | 1          | 0.18      | 1          | 0.82      | 0          |
| 0.26      | 0          | 0.16      | 1          | 0.35      | 0          | 0.34      | 1          | 0.17      | 1          | 6.22      | 0          |

| time<br>A | leuko<br>A | time<br>A | leuko<br>A | time<br>B | leuko<br>B | time<br>C | leuko<br>C | time<br>D | leuko<br>D | time<br>E | leuko<br>E |
|-----------|------------|-----------|------------|-----------|------------|-----------|------------|-----------|------------|-----------|------------|
| 0.22      | 0          | 0.17      | 1          | 0.28      | 0          | 1.44      | 1          | 0.18      | 1          | 0.27      | 0          |
| 0.20      | 0          | 0.18      | 1          | 0.24      | 0          | 3.94      | 0          | 1.10      | 1          | 1.57      | 0          |
| 0.27      | 0          | 0.17      | 1          | 0.23      | 0          | 0.30      | 0          | 0.20      | 1          | 0.28      | 0          |
| 0.43      | 0          | 0.18      | 1          | 5.31      | 1          | 1.19      | 0          | 0.50      | 1          | 0.65      | 0          |
| 0.20      | 0          | 0.16      | 1          | 1.07      | 1          | 0.33      | 0          | 0.43      | 1          | 4.99      | 1          |
| 4.95      | 1          | 0.15      | 1          | 0.31      | 1          | 0.86      | 0          | 0.75      | 1          | 0.33      | 1          |
| 0.23      | 1          | 0.16      | 1          | 6.70      | 0          | 2.15      | 0          | 0.23      | 1          | 0.28      | 1          |
| 0.22      | 1          | 0.16      | 1          | 0.37      | 0          | 2.41      | 0          | 0.22      | 1          | 3.82      | 0          |
| 12.31     | 0          | 0.15      | 1          | 0.45      | 0          | 0.99      | 0          | 0.28      | 1          | 0.26      | 0          |
| 0.24      | 0          | 1.86      | 0          | 1.32      | 0          | 0.87      | 0          | 0.28      | 1          | 0.76      | 0          |
| 0.21      | 0          | 0.20      | 0          | 0.35      | 0          | 3.25      | 1          | 8.19      | 0          | 0.81      | 0          |
| 0.21      | 0          | 0.17      | 0          | 0.36      | 0          | 0.24      | 1          | 1.18      | 0          | 4.30      | 0          |
| 0.16      | 0          | 0.18      | 0          | 1.28      | 0          | 0.23      | 1          | 0.29      | 0          | 0.32      | 0          |
| 0.23      | 0          | 0.19      | 0          | 1.18      | 0          | 0.22      | 1          | 4.24      | 0          | 3.38      | 0          |
| 0.33      | 0          | 0.20      | 0          | 0.61      | 0          | 0.26      | 1          | 1.80      | 0          | 0.99      | 0          |
| 7.77      | 1          | 0.16      | 0          | 0.93      | 0          | 0.45      | 1          | 0.31      | 0          | 1.06      | 0          |
| 0.31      | 1          | 0.35      | 0          | 0.30      | 0          | 0.22      | 1          | 0.92      | 0          | 0.25      | 0          |
| 0.23      | 1          | 0.19      | 0          | 0.26      | 0          | 0.21      | 1          | 4.13      | 0          | 0.28      | 0          |
| 0.21      | 1          | 0.26      | 0          | 0.51      | 1          | 4.28      | 0          | 7.17      | 1          | 0.55      | 0          |
| 0.18      | 1          | 0.66      | 0          | 0.28      | 1          | 0.29      | 0          | 0.19      | 1          | 0.26      | 0          |
| 0.20      | 1          | 0.25      | 0          | 0.24      | 1          | 0.26      | 0          | 0.20      | 1          | 1.02      | 0          |
| 0.18      | 1          | 0.25      | 0          | 0.22      | 1          | 1.84      | 0          | 0.19      | 1          | 0.26      | 0          |
| 0.18      | 1          | 0.26      | 0          | 6.35      | 1          | 0.59      | 0          | 0.16      | 1          | 0.34      | 0          |
| 0.19      | 1          | 0.37      | 0          | 0.29      | 1          | 0.70      | 0          | 0.17      | 1          | 0.46      | 0          |
| 0.19      | 1          | 2.72      | 1          | 0.93      | 1          | 0.40      | 0          | 0.28      | 1          | 6.94      | 1          |
| 0.19      | 1          | 0.21      | 1          | 0.28      | 1          | 0.60      | 0          | 0.32      | 1          | 0.32      | 1          |
| 1.68      | 0          | 0.18      | 1          | 0.22      | 1          | 0.90      | 0          | 0.96      | 1          | 0.33      | 1          |
| 0.31      | 0          | 0.17      | 1          | 0.34      | 1          | 1.03      | 0          | 0.37      | 1          | 1.94      | 0          |
| 2.76      | 0          | 0.18      | 1          | 0.24      | 1          | 0.84      | 0          | 0.56      | 1          | 0.32      | 0          |
| 0.85      | 0          | 0.19      | 1          | 0.22      | 1          | 0.28      | 0          | 0.21      | 1          | 0.66      | 0          |
| 0.24      | 0          | 0.19      | 1          | 5.05      | 0          | 0.78      | 0          | 3.59      | 0          | 0.43      | 0          |
| 1.34      | 0          | 0.84      | 0          | 0.38      | 0          | 1.15      | 0          | 0.63      | 0          | 1.44      | 0          |
| 0.24      | 0          | 0.24      | 0          | 0.47      | 0          | 3.80      | 1          | 1.37      | 0          | 1.56      | 0          |
| 3.22      | 1          | 0.20      | 0          | 0.74      | 0          | 0.26      | 1          | 1.05      | 0          | 1.62      | 0          |
| 0.24      | 1          | 0.21      | 0          | 0.42      | 0          | 0.35      | 1          | 0.97      | 0          | 0.64      | 0          |
| 0.20      | 1          | 0.20      | 0          | 0.33      | 0          | 0.20      | 1          | 0.54      | 0          | 0.57      | 0          |
| 0.19      | 1          | 0.21      | 0          | 0.29      | 0          | 0.24      | 1          | 1.39      | 0          | 0.25      | 0          |
| 0.18      | 1          | 0.20      | 0          | 0.30      | 0          | 0.19      | 1          | 1.14      | 0          | 0.43      | 0          |
| 0.18      | 1          | 0.20      | 0          | 0.63      | 0          | 0.07      | 1          | 0.91      | 0          | 0.27      | 0          |
| 0.16      | 1          | 0.21      | 0          | 0.98      | 0          | 0.30      | 1          | 0.64      | 0          | 0.31      | 0          |
| 0.18      | 1          | 0.51      | 0          | 0.44      | 0          | 1.98      | 1          | 0.44      | 0          | 1.87      | 0          |
| 0.17      | 1          | 0.26      | 0          | 0.29      | 0          | 0.24      | 1          | 0.99      | 0          | 0.47      | 0          |
| 0.18      | 1          | 0.21      | 0          | 6.09      | 0          | 0.09      | 1          | 1.12      | 0          | 0.25      | 0          |
| 0.15      | 1          | 1.92      | 1          | 0.34      | 0          | 0.19      | 1          | 3.04      | 0          | 0.88      | 0          |
| 0.09      | 1          | 0.22      | 1          | 0.30      | 0          | 3.03      | 0          | 1.59      | 0          | 0.27      | 0          |
| 30.53     | 1          | 0.17      | 1          | 0.24      | 0          | 0.29      | 0          | 0.39      | 0          | 1.16      | 0          |
| 0.24      | 1          | 0.16      | 1          | 0.85      | 0          | 0.94      | 0          | 0.36      | 0          | 0.74      | 0          |
| 0.24      | 1          | 0.18      | 1          | 0.35      | 0          | 0.25      | 0          | 1.16      | 0          | 0.30      | 0          |
| 0.22      | 1          | 1.13      | 0          | 0.33      | 0          | 0.31      | 0          | 1.03      | 0          | 0.42      | 0          |
| 0.23      | 1          | 0.23      | 0          | 0.29      | 0          | 1.60      | 0          | 7.83      | 1          | 6.20      | 1          |
| 0.20      | 1          | 0.20      | 0          | 0.41      | 0          | 0.99      | 0          | 0.22      | 1          | 0.30      | 1          |

| time<br>A | leuko<br>A | time<br>A | leuko<br>A | time<br>B | leuko<br>B | time<br>C | leuko<br>C | time<br>D | leuko<br>D | time<br>E | leuko<br>E |
|-----------|------------|-----------|------------|-----------|------------|-----------|------------|-----------|------------|-----------|------------|
| 0.18      | 1          | 0.21      | 0          | 0.31      | 0          | 0.26      | 0          | 0.21      | 1          | 0.32      | 1          |
| 0.18      | 1          | 0.20      | 0          | 3.05      | 0          | 0.24      | 0          | 0.25      | 1          | 0.28      | 1          |
| 0.29      | 0          | 0.17      | 0          | 0.29      | 0          | 0.41      | 0          | 0.20      | 1          | 0.35      | 1          |
| 0.26      | 0          | 0.17      | 0          | 0.26      | 0          | 0.48      | 0          | 1.16      | 1          | 0.28      | 1          |
| 0.18      | 0          | 2.11      | 1          | 0.58      | 1          | 0.32      | 0          | 1.92      | 0          | 1.83      | 0          |
| 0.20      | 0          | 0.22      | 1          | 0.28      | 1          | 1.08      | 0          | 0.38      | 0          | 0.79      | 0          |
| 0.21      | 0          | 2.86      | 1          | 3.85      | 0          | 0.31      | 0          | 0.29      | 0          | 1.49      | 0          |
| 0.10      | 0          | 0.22      | 1          | 0.26      | 0          | 0.46      | 0          | 4.63      | 0          | 0.27      | 0          |
| 0.24      | 0          | 0.28      | 1          | 0.23      | 0          | 0.41      | 0          | 0.30      | 0          | 1.15      | 0          |
| 0.19      | 0          | 0.19      | 1          | 2.26      | 1          | 0.90      | 0          | 0.32      | 0          | 0.32      | 0          |
| 0.18      | 0          | 0.16      | 1          | 0.31      | 1          | 1.17      | 0          | 3.86      | 0          | 1.03      | 0          |
| 0.18      | 0          | 0.18      | 1          | 0.36      | 1          | 0.31      | 0          | 0.72      | 0          | 0.29      | 0          |
| 0.19      | 0          | 0.17      | 1          | 0.21      | 1          | 3.98      | 1          | 0.31      | 0          | 3.72      | 0          |
| 0.18      | 0          | 0.17      | 1          | 3.44      | 0          | 0.21      | 1          | 0.44      | 0          | 0.29      | 0          |
| 0.22      | 0          | 1.16      | 0          | 0.34      | 0          | 0.20      | 1          | 0.31      | 0          | 0.88      | 0          |
| 0.20      | 0          | 0.24      | 0          | 0.73      | 0          | 0.19      | 1          | 1.76      | 0          | 0.28      | 0          |
| 0.19      | 0          | 0.17      | 0          | 1.09      | 0          | 0.22      | 1          | 8.02      | 1          | 0.25      | 0          |
| 0.18      | 0          | 0.19      | 0          | 0.42      | 0          | 0.19      | 1          | 0.19      | 1          | 0.37      | 0          |
| 2.90      | 1          | 0.22      | 0          | 0.27      | 0          | 0.09      | 1          | 0.19      | 1          | 0.23      | 0          |
| 0.24      | 1          | 0.31      | 0          | 0.24      | 0          | 0.13      | 1          | 0.19      | 1          | 6.97      | 1          |
| 0.19      | 1          | 0.22      | 0          | 0.24      | 0          | 1.70      | 0          | 0.23      | 1          | 0.26      | 1          |
| 0.18      | 1          | 0.17      | 0          | 0.36      | 0          | 0.56      | 0          | 0.20      | 1          | 0.35      | 1          |
| 0.20      | 1          | 0.18      | 0          | 0.26      | 0          | 0.24      | 0          | 0.18      | 1          | 0.52      | 1          |
| 0.17      | 1          | 0.14      | 0          | 2.14      | 0          | 0.40      | 0          | 0.17      | 1          | 0.32      | 1          |
| 2.44      | 0          | 0.16      | 0          | 0.73      | 0          | 0.28      | 0          | 0.19      | 1          | 0.36      | 1          |
| 0.26      | 0          | 0.19      | 0          | 1.57      | 1          | 0.40      | 0          | 0.21      | 1          | 0.30      | 1          |
| 0.26      | 0          | 0.16      | 0          | 0.27      | 1          | 0.26      | 0          | 0.16      | 1          | 0.59      | 1          |
| 0.22      | 0          | 0.18      | 0          | 0.23      | 1          | 0.62      | 0          | 0.24      | 1          | 3.76      | 0          |
| 0.23      | 0          | 3.02      | 1          | 0.21      | 1          | 0.69      | 0          | 0.23      | 1          | 0.33      | 0          |
| 3.70      | 1          | 0.23      | 1          | 7.31      | 1          | 0.80      | 0          | 0.25      | 0          | 1.44      | 0          |
| 0.25      | 1          | 0.18      | 1          | 0.25      | 1          | 0.84      | 0          | 0.24      | 0          | 3.00      | 0          |
| 0.21      | 1          | 0.16      | 1          | 0.81      | 1          | 1.73      | 0          | 0.62      | 0          | 0.35      | 0          |
| 0.17      | 1          | 0.18      | 1          | 0.24      | 1          | 0.62      | 0          | 0.30      | 0          | 0.37      | 0          |
| 0.22      | 1          | 0.18      | 1          | 0.21      | 1          | 0.35      | 0          | 1.18      | 0          | 2.58      | 0          |
| 0.19      | 1          | 3.06      | 0          | 3.31      | 0          | 0.67      | 0          | 0.32      | 0          | 0.31      | 0          |
| 0.85      | 0          | 0.21      | 0          | 0.42      | 0          | 0.39      | 0          | 1.51      | 0          | 0.35      | 0          |
| 0.20      | 0          | 0.20      | 0          | 0.33      | 0          | 0.69      | 0          | 1.25      | 0          | 0.83      | 0          |
| 0.21      | 0          | 3.94      | 1          | 0.31      | 0          | 0.37      | 0          | 5.36      | 0          | 0.33      | 0          |
| 0.18      | 0          | 0.23      | 1          | 2.70      | 0          | 0.36      | 0          | 0.70      | 0          | 0.32      | 0          |
| 0.22      | 0          | 0.18      | 1          | 0.33      | 0          | 3.62      | 1          | 0.83      | 0          | 1.04      | 0          |
| 0.25      | 0          | 0.20      | 1          | 1.56      | 0          | 0.23      | 1          | 3.04      | 1          | 0.69      | 0          |
| 0.17      | 0          | 0.29      | 1          | 11.78     | 1          | 0.23      | 1          | 0.18      | 1          | 1.93      | 0          |
| 0.22      | 0          | 0.20      | 1          | 0.25      | 1          | 0.21      | 1          | 0.23      | 1          | 0.30      | 0          |
| 0.24      | 0          | 0.17      | 1          | 0.22      | 1          | 0.22      | 1          | 0.21      | 1          | 0.82      | 0          |
| 0.23      | 0          | 0.19      | 1          | 0.36      | 1          | 0.47      | 1          | 0.21      | 1          | 7.52      | 1          |
| 0.21      | 0          | 0.19      | 1          | 0.19      | 1          | 0.22      | 1          | 0.22      | 1          | 0.28      | 1          |
| 0.23      | 0          | 0.19      | 1          | 0.38      | 1          | 13.50     | 0          | 0.21      | 1          | 0.27      | 1          |
| 0.18      | 0          | 0.20      | 1          | 0.21      | 1          | 0.89      | 0          | 0.20      | 1          | 0.41      | 1          |
| 0.20      | 0          | 0.60      | 0          | 0.21      | 1          | 1.04      | 0          | 0.21      | 1          | 0.38      | 1          |
| 0.18      | 0          | 0.20      | 0          | 0.20      | 1          | 0.95      | 0          | 0.18      | 1          | 0.32      | 1          |
| 0.20      | 0          | 0.18      | 0          | 0.33      | 1          | 1.00      | 0          | 0.17      | 1          | 0.42      | 1          |

| time<br>A | leuko<br>A | time<br>A | leuko<br>A | time<br>B | leuko<br>B | time<br>C | leuko<br>C | time<br>D | leuko<br>D | time<br>E | leuko<br>E |
|-----------|------------|-----------|------------|-----------|------------|-----------|------------|-----------|------------|-----------|------------|
| 0.19      | 0          | 0.20      | 0          | 0.27      | 1          | 1.00      | 0          | 0.71      | 0          | 0.27      | 1          |
| 0.18      | 0          | 0.24      | 0          | 0.24      | 1          | 0.53      | 0          | 0.20      | 0          | 3.36      | 0          |
| 3.64      | 1          | 0.27      | 0          | 4.34      | 0          | 0.54      | 0          | 1.46      | 0          | 0.28      | 0          |
| 0.25      | 1          | 0.31      | 0          | 0.80      | 0          | 1.15      | 0          | 1.01      | 0          | 1.57      | 0          |
| 0.19      | 1          | 3.36      | 1          | 0.34      | 0          | 0.39      | 0          | 0.23      | 0          | 0.26      | 0          |
| 0.19      | 1          | 0.19      | 1          | 0.29      | 0          | 0.74      | 0          | 0.26      | 0          | 0.66      | 0          |
| 0.07      | 1          | 0.20      | 1          | 0.25      | 0          | 1.76      | 0          | 1.03      | 0          | 0.26      | 0          |
| 0.14      | 1          | 0.22      | 1          | 0.27      | 0          | 0.86      | 0          | 0.94      | 0          | 0.50      | 0          |
| 0.23      | 1          | 0.22      | 1          | 0.29      | 0          | 0.89      | 0          | 3.30      | 0          | 0.84      | 0          |
| 0.13      | 1          | 0.19      | 1          | 0.75      | 0          | 0.29      | 0          | 2.58      | 0          | 0.92      | 0          |
| 0.16      | 1          | 1.46      | 0          | 0.31      | 0          | 2.97      | 1          | 31.20     | 0          | 1.30      | 0          |
| 0.75      | 0          | 0.22      | 0          | 0.26      | 0          | 0.22      | 1          | 0.50      | 0          | 2.21      | 0          |
| 0.24      | 0          | 0.21      | 0          | 0.26      | 0          | 0.21      | 1          | 0.38      | 0          | 0.24      | 0          |
| 0.14      | 0          | 0.18      | 0          | 0.25      | 0          | 0.25      | 1          | 5.22      | 1          | 0.53      | 0          |
| 0.37      | 0          | 0.21      | 0          | 0.24      | 0          | 0.46      | 1          | 0.21      | 1          | 0.93      | 0          |
| 0.22      | 0          | 0.20      | 0          | 5.42      | 1          | 1.62      | 0          | 0.21      | 1          | 2.35      | 0          |
| 0.21      | 0          | 0.22      | 0          | 0.31      | 1          | 0.25      | 0          | 0.17      | 1          | 2.12      | 0          |
| 0.23      | 0          | 0.26      | 0          | 0.07      | 1          | 0.29      | 0          | 0.18      | 1          | 1.55      | 0          |
| 0.17      | 0          | 2.23      | 1          | 0.11      | 1          | 0.22      | 0          | 0.17      | 1          | 0.24      | 0          |
| 0.21      | 0          | 0.20      | 1          | 0.28      | 1          | 0.42      | 0          | 0.18      | 1          | NA        | NA         |
| 0.21      | 0          | 0.19      | 1          | 0.22      | 1          | 0.56      | 0          | 0.19      | 1          | NA        | NA         |
| 0.21      | 0          | 0.23      | 1          | 0.65      | 1          | 0.42      | 0          | 0.19      | 1          | NA        | NA         |
| 1.99      | 1          | 0.36      | 1          | 0.22      | 1          | 0.95      | 0          | 0.19      | 1          | NA        | NA         |
| 0.24      | 1          | 0.25      | 1          | 2.78      | 0          | 1.67      | 0          | 0.19      | 1          | NA        | NA         |
| 0.08      | 1          | 0.19      | 1          | 0.39      | 0          | 1.04      | 0          | 0.17      | 1          | NA        | NA         |
| 0.11      | 1          | 0.15      | 1          | 0.31      | 0          | 1.56      | 0          | 0.19      | 1          | NA        | NA         |
| 0.18      | 1          | 0.19      | 1          | 0.62      | 0          | 0.86      | 0          | 0.19      | 1          | NA        | NA         |
| 0.18      | 1          | 0.16      | 1          | 0.31      | 0          | 4.31      | 1          | 0.22      | 1          | NA        | NA         |
| 0.17      | 1          | 0.16      | 1          | 0.64      | 0          | 0.21      | 1          | 0.01      | 0          | NA        | NA         |
| 2.17      | 0          | 0.59      | 0          | 0.29      | 0          | 0.22      | 1          | 0.19      | 0          | NA        | NA         |
| 2.48      | 0          | 0.21      | 0          | 8.52      | 1          | 0.20      | 1          | 1.11      | 0          | NA        | NA         |
| 0.21      | 0          | 0.20      | 0          | 0.24      | 1          | 0.20      | 1          | 0.49      | 0          | NA        | NA         |
| 2.83      | 1          | 0.18      | 0          | 0.63      | 1          | 1.08      | 1          | 0.65      | 0          | NA        | NA         |
| 0.25      | 1          | 0.20      | 0          | 0.22      | 1          | 0.10      | 1          | 0.79      | 0          | NA        | NA         |
| 0.18      | 1          | 0.31      | 0          | 0.34      | 1          | 1.17      | 0          | 0.94      | 0          | NA        | NA         |
| 0.19      | 1          | 0.23      | 0          | 0.24      | 1          | 3.20      | 0          | 0.84      | 0          | NA        | NA         |
| 0.17      | 1          | 0.18      | 0          | 0.42      | 1          | 0.72      | 0          | 0.93      | 0          | NA        | NA         |
| 6.87      | 1          | 0.18      | 0          | 0.24      | 1          | 1.77      | 0          | 0.48      | 0          | NA        | NA         |
| 0.26      | 1          | 2.55      | 1          | 0.21      | 1          | 1.06      | 0          | 0.63      | 0          | NA        | NA         |
| 0.19      | 1          | 0.20      | 1          | 0.20      | 1          | 2.53      | 0          | 0.71      | 0          | NA        | NA         |
| 0.19      | 1          | 0.21      | 1          | 0.20      | 1          | 3.55      | 1          | 0.35      | 0          | NA        | NA         |
| 0.18      | 1          | 0.20      | 1          | 6.11      | 0          | 0.24      | 1          | 0.26      | 0          | NA        | NA         |
| 0.19      | 1          | 0.16      | 1          | 0.37      | 0          | 0.09      | 1          | 0.33      | 0          | NA        | NA         |
| 0.17      | 1          | 0.19      | 1          | 0.31      | 0          | 0.13      | 1          | 9.51      | 1          | NA        | NA         |
| 4.40      | 0          | 0.19      | 1          | 0.28      | 0          | 0.22      | 1          | 0.21      | 1          | NA        | NA         |
| 0.24      | 0          | 0.20      | 1          | 0.34      | 0          | 0.10      | 1          | 0.19      | 1          | NA        | NA         |
| 0.20      | 0          | 0.21      | 1          | 2.53      | 0          | 0.11      | 1          | 0.43      | 1          | NA        | NA         |
| 0.20      | 0          | 0.20      | 1          | 0.60      | 0          | 0.51      | 1          | 0.19      | 1          | NA        | NA         |
| 0.18      | 0          | 0.63      | 0          | 1.51      | 1          | 0.22      | 1          | 0.19      | 1          | NA        | NA         |
| 0.18      | 0          | 0.22      | 0          | 0.29      | 1          | 0.07      | 1          | 0.18      | 1          | NA        | NA         |
| 6.70      | 1          | 0.18      | 0          | 0.22      | 1          | 0.12      | 1          | 0.34      | 1          | NA        | NA         |

| time<br>A | leuko<br>A | time<br>A | leuko<br>A | time<br>B | leuko<br>B | time<br>C | leuko<br>C | time<br>D | leuko<br>D | time<br>E | leuko<br>E |
|-----------|------------|-----------|------------|-----------|------------|-----------|------------|-----------|------------|-----------|------------|
| 0.23      | 1          | 0.21      | 0          | 0.20      | 1          | 0.08      | 1          | 0.19      | 1          | NA        | NA         |
| 0.22      | 1          | 0.19      | 0          | 0.32      | 1          | 6.06      | 0          | 0.18      | 1          | NA        | NA         |
| 0.18      | 1          | 0.17      | 0          | 0.23      | 1          | 5.53      | 0          | 0.19      | 1          | NA        | NA         |
| 0.18      | 1          | 0.20      | 0          | 0.21      | 1          | 2.23      | 0          | 3.39      | 0          | NA        | NA         |
| 0.19      | 1          | 0.22      | 0          | 0.28      | 1          | 8.50      | 1          | 0.29      | 0          | NA        | NA         |
| 0.16      | 1          | 0.46      | 0          | 0.22      | 1          | 0.23      | 1          | 1.18      | 0          | NA        | NA         |
| 6.77      | 1          | 0.22      | 0          | 0.22      | 1          | 4.90      | 1          | 0.41      | 0          | NA        | NA         |
| 0.25      | 1          | 0.16      | 0          | 0.20      | 1          | 0.10      | 1          | 1.09      | 0          | NA        | NA         |
| 0.19      | 1          | 0.18      | 0          | 6.58      | 1          | 4.25      | 1          | 0.48      | 0          | NA        | NA         |
| 0.19      | 1          | 0.19      | 0          | 0.31      | 1          | 0.04      | 1          | 0.24      | 0          | NA        | NA         |
| 0.27      | 1          | 0.22      | 0          | 3.37      | 0          | 0.12      | 1          | 0.30      | 0          | NA        | NA         |
| 0.21      | 1          | 0.18      | 0          | 0.36      | 0          | 0.07      | 1          | 1.40      | 0          | NA        | NA         |
| 0.19      | 1          | 3.41      | 1          | 0.66      | 0          | 0.15      | 1          | 0.96      | 0          | NA        | NA         |
| 3.90      | 0          | 0.23      | 1          | 0.32      | 0          | 0.21      | 1          | 0.94      | 0          | NA        | NA         |
| 7.92      | 1          | 0.15      | 1          | 0.64      | 0          | 0.24      | 1          | 2.66      | 0          | NA        | NA         |
| 0.24      | 1          | 0.21      | 1          | 0.31      | 0          | 4.35      | 0          | 2.93      | 0          | NA        | NA         |
| 0.19      | 1          | 0.21      | 1          | 0.91      | 0          | 1.87      | 0          | 0.61      | 0          | NA        | NA         |
| 0.19      | 1          | 0.18      | 1          | 0.43      | 0          | 3.74      | 1          | 7.02      | 1          | NA        | NA         |
| 0.18      | 1          | 0.90      | 1          | 0.39      | 0          | 0.01      | 1          | 0.21      | 1          | NA        | NA         |
| 4.90      | 1          | 0.21      | 1          | 0.50      | 0          | 0.18      | 1          | 0.17      | 1          | NA        | NA         |
| 1.72      | 0          | 0.38      | 0          | 1.24      | 0          | 0.07      | 1          | 0.21      | 1          | NA        | NA         |
| 0.25      | 0          | 0.82      | 0          | 4.50      | 1          | 0.13      | 1          | 0.19      | 1          | NA        | NA         |
| 0.36      | 0          | 0.21      | 0          | 0.24      | 1          | 0.21      | 1          | 0.22      | 1          | NA        | NA         |
| 1.16      | 0          | 0.15      | 0          | 0.39      | 1          | 0.19      | 1          | 0.21      | 1          | NA        | NA         |
| 4.49      | 1          | 0.22      | 0          | 0.23      | 1          | 0.08      | 1          | 0.20      | 1          | NA        | NA         |
| 1.05      | 0          | 0.22      | 0          | 0.47      | 1          | 0.11      | 1          | 0.22      | 1          | NA        | NA         |
| 0.23      | 0          | 0.20      | 0          | 0.23      | 1          | 0.21      | 1          | 0.20      | 1          | NA        | NA         |
| 0.23      | 0          | 0.25      | 0          | 0.21      | 1          | 1.36      | 0          | 0.16      | 1          | NA        | NA         |
| 0.24      | 0          | 0.31      | 0          | 3.92      | 0          | 3.83      | 0          | 0.28      | 0          | NA        | NA         |
| 0.23      | 0          | 0.22      | 0          | 0.45      | 0          | 0.28      | 0          | 0.21      | 0          | NA        | NA         |
| 0.23      | 0          | 0.20      | 0          | 0.38      | 0          | 3.18      | 0          | 0.19      | 0          | NA        | NA         |
| 0.18      | 0          | 0.18      | 0          | 0.46      | 0          | 4.24      | 1          | 1.39      | 0          | NA        | NA         |
| 0.17      | 0          | 0.34      | 0          | 0.27      | 0          | 0.24      | 1          | 0.36      | 0          | NA        | NA         |
| 1.76      | 1          | 0.23      | 0          | 0.37      | 0          | 0.09      | 1          | 0.48      | 0          | NA        | NA         |
| 0.26      | 1          | 0.23      | 0          | 0.28      | 0          | 4.00      | 0          | 0.43      | 0          | NA        | NA         |
| 0.21      | 1          | 2.73      | 1          | 1.07      | 0          | 0.31      | 0          | 0.63      | 0          | NA        | NA         |
| 0.20      | 1          | 0.29      | 1          | 0.36      | 0          | 1.20      | 0          | 1.11      | 0          | NA        | NA         |
| 0.19      | 1          | 0.17      | 1          | 0.42      | 0          | 0.85      | 0          | 0.56      | 0          | NA        | NA         |
| 0.16      | 1          | 0.17      | 1          | 0.33      | 0          | 1.30      | 0          | 0.55      | 0          | NA        | NA         |
| 0.19      | 1          | 0.20      | 1          | 2.22      | 1          | 1.71      | 0          | 0.36      | 0          | NA        | NA         |
| 0.19      | 1          | 0.37      | 1          | 0.24      | 1          | 0.87      | 0          | 1.65      | 0          | NA        | NA         |
| 0.19      | 1          | 0.41      | 1          | 0.34      | 1          | 4.41      | 1          | 1.89      | 0          | NA        | NA         |
| 0.18      | 1          | 0.65      | 0          | 0.22      | 1          | 0.10      | 1          | 0.97      | 0          | NA        | NA         |
| 0.19      | 1          | 0.22      | 0          | 0.22      | 1          | 0.11      | 1          | 0.68      | 0          | NA        | NA         |
| 0.17      | 1          | 0.39      | 0          | 0.21      | 1          | 2.54      | 0          | 0.59      | 0          | NA        | NA         |
| 1.62      | 0          | 0.22      | 0          | 4.94      | 1          | 1.08      | 0          | 0.48      | 0          | NA        | NA         |
| 0.64      | 0          | 0.24      | 0          | 0.27      | 1          | 0.27      | 0          | 0.25      | 0          | NA        | NA         |
| 0.99      | 0          | 0.22      | 0          | 0.23      | 1          | 0.86      | 0          | 6.72      | 1          | NA        | NA         |
| 1.54      | 0          | 0.21      | 0          | 0.22      | 1          | 0.24      | 0          | 0.20      | 1          | NA        | NA         |
| 0.52      | 0          | 0.39      | 0          | 4.72      | 0          | 1.05      | 0          | 0.26      | 1          | NA        | NA         |
| 4.85      | 1          | NA        | NA         | 4.34      | 0          | 0.23      | 0          | 0.17      | 1          | NA        | NA         |

| time<br>A | leuko<br>A | time<br>A | leuko<br>A | time<br>B | leuko<br>B | time<br>C | leuko<br>C | time<br>D | leuko<br>D | time<br>E | leuko<br>E |
|-----------|------------|-----------|------------|-----------|------------|-----------|------------|-----------|------------|-----------|------------|
| 0.27      | 1          | NA        | NA         | 0.27      | 0          | 0.41      | 0          | 0.37      | 1          | NA        | NA         |
| 0.20      | 1          | NA        | NA         | 4.27      | 1          | 3.18      | 0          | 0.17      | 1          | NA        | NA         |
| 0.19      | 1          | NA        | NA         | 0.25      | 1          | 3.08      | 1          | 0.48      | 1          | NA        | NA         |
| 0.19      | 1          | NA        | NA         | 0.22      | 1          | 0.31      | 1          | 0.19      | 1          | NA        | NA         |
| 0.18      | 1          | NA        | NA         | 0.55      | 1          | 0.28      | 1          | 0.28      | 1          | NA        | NA         |
| 0.19      | 1          | NA        | NA         | 0.20      | 1          | 0.27      | 1          | 0.89      | 0          | NA        | NA         |
| 6.31      | 0          | NA        | NA         | 0.41      | 1          | 0.26      | 1          | 0.36      | 0          | NA        | NA         |
| 3.01      | 1          | NA        | NA         | 0.22      | 1          | 0.26      | 1          | 0.57      | 0          | NA        | NA         |
| 0.27      | 1          | NA        | NA         | 0.21      | 1          | 0.23      | 1          | 0.96      | 0          | NA        | NA         |
| 0.20      | 1          | NA        | NA         | 6.02      | 0          | 0.31      | 1          | 0.26      | 0          | NA        | NA         |
| 0.58      | 1          | NA        | NA         | 0.36      | 0          | 0.25      | 1          | 1.32      | 0          | NA        | NA         |
| 4.28      | 0          | NA        | NA         | 0.29      | 0          | 0.22      | 1          | 0.32      | 0          | NA        | NA         |
| 3.24      | 1          | NA        | NA         | 1.12      | 0          | 1.70      | 0          | 1.59      | 0          | NA        | NA         |
| 0.35      | 1          | NA        | NA         | 0.27      | 0          | 2.44      | 0          | 0.79      | 0          | NA        | NA         |
| 2.40      | 0          | NA        | NA         | 6.59      | 0          | 0.81      | 0          | 0.74      | 0          | NA        | NA         |
| 1.01      | 0          | NA        | NA         | 0.28      | 0          | 0.91      | 0          | 0.97      | 0          | NA        | NA         |
| 0.31      | 0          | NA        | NA         | 0.38      | 0          | 4.92      | 0          | 5.19      | 0          | NA        | NA         |
| 0.26      | 0          | NA        | NA         | 0.24      | 0          | 0.54      | 0          | 4.76      | 1          | NA        | NA         |
| 0.85      | 0          | NA        | NA         | 0.33      | 0          | 2.42      | 1          | 0.20      | 1          | NA        | NA         |
| 0.37      | 0          | NA        | NA         | 0.21      | 0          | 0.22      | 1          | 0.18      | 1          | NA        | NA         |
| 0.29      | 0          | NA        | NA         | 0.80      | 0          | 0.21      | 1          | 0.32      | 1          | NA        | NA         |
| 2.06      | 1          | NA        | NA         | 0.24      | 0          | 0.08      | 1          | 0.19      | 1          | NA        | NA         |
| 0.24      | 1          | NA        | NA         | 1.99      | 0          | 0.19      | 1          | 0.45      | 1          | NA        | NA         |
| 0.21      | 1          | NA        | NA         | 0.20      | 0          | 0.21      | 1          | 0.20      | 1          | NA        | NA         |
| 0.55      | 1          | NA        | NA         | 0.48      | 0          | 0.07      | 1          | 0.19      | 1          | NA        | NA         |
| 0.53      | 0          | NA        | NA         | 0.24      | 0          | 0.37      | 1          | 0.35      | 1          | NA        | NA         |
| 0.42      | 0          | NA        | NA         | 2.85      | 1          | 0.32      | 1          | 1.48      | 0          | NA        | NA         |
| 0.30      | 0          | NA        | NA         | 0.27      | 1          | 0.20      | 1          | 0.27      | 0          | NA        | NA         |
| 0.27      | 0          | NA        | NA         | 0.23      | 1          | 0.25      | 1          | 1.30      | 0          | NA        | NA         |
| 0.55      | 0          | NA        | NA         | 0.22      | 1          | 0.07      | 1          | 0.18      | 0          | NA        | NA         |
| 3.54      | 1          | NA        | NA         | 0.29      | 1          | 6.89      | 0          | 0.30      | 0          | NA        | NA         |
| 0.24      | 1          | NA        | NA         | 0.18      | 1          | 9.02      | 0          | 0.30      | 0          | NA        | NA         |
| 0.25      | 1          | NA        | NA         | 0.26      | 1          | NA        | NA         | 0.83      | 0          | NA        | NA         |
| 1.11      | 1          | NA        | NA         | 0.20      | 1          | NA        | NA         | 0.25      | 0          | NA        | NA         |
| 1.22      | 0          | NA        | NA         | 0.21      | 1          | NA        | NA         | 0.44      | 0          | NA        | NA         |
| 0.42      | 0          | NA        | NA         | 0.31      | 1          | NA        | NA         | 0.43      | 0          | NA        | NA         |
| 0.40      | 0          | NA        | NA         | 0.24      | 1          | NA        | NA         | 1.00      | 0          | NA        | NA         |
| 1.19      | 0          | NA        | NA         | 0.23      | 1          | NA        | NA         | 0.26      | 0          | NA        | NA         |
| 3.43      | 1          | NA        | NA         | NA        | NA         | NA        | NA         | 1.02      | 0          | NA        | NA         |
| 0.27      | 1          | NA        | NA         | NA        | NA         | NA        | NA         | 1.31      | 0          | NA        | NA         |
| 0.26      | 1          | NA        | NA         | NA        | NA         | NA        | NA         | 0.30      | 0          | NA        | NA         |
| 0.20      | 1          | NA        | NA         | NA        | NA         | NA        | NA         | 0.39      | 0          | NA        | NA         |
| 0.07      | 1          | NA        | NA         | NA        | NA         | NA        | NA         | 0.83      | 0          | NA        | NA         |
| 0.10      | 1          | NA        | NA         | NA        | NA         | NA        | NA         | 0.38      | 0          | NA        | NA         |
| 1.42      | 0          | NA        | NA         | NA        | NA         | NA        | NA         | 0.31      | 0          | NA        | NA         |
| 0.37      | 0          | NA        | NA         | NA        | NA         | NA        | NA         | 0.50      | 0          | NA        | NA         |
| 0.96      | 0          | NA        | NA         | NA        | NA         | NA        | NA         | NA        | NA         | NA        | NA         |
| 0.29      | 0          | NA        | NA         | NA        | NA         | NA        | NA         | NA        | NA         | NA        | NA         |
| 0.25      | 0          | NA        | NA         | NA        | NA         | NA        | NA         | NA        | NA         | NA        | NA         |
| 1.49      | 0          | NA        | NA         | NA        | NA         | NA        | NA         | NA        | NA         | NA        | NA         |

## 1.8 SL007

Table 8: Raw data of TBS SL007.

| time A | leuko A | time A | leuko A | time B | leuko B | time D | leuko D | time E | leuko E |
|--------|---------|--------|---------|--------|---------|--------|---------|--------|---------|
| 0.00   | 1       | 0.00   | 1       | 0.00   | 0       | 0.00   | 1       | 0.00   | 1       |
| 0.27   | 1       | 0.29   | 1       | 1.39   | 0       | 0.23   | 1       | 0.24   | 1       |
| 0.21   | 1       | 0.61   | 1       | 1.73   | 0       | 0.19   | 1       | 0.26   | 1       |
| 0.24   | 1       | 0.25   | 1       | 2.28   | 0       | 0.33   | 1       | 0.27   | 1       |
| 1.14   | 1       | 0.21   | 1       | 2.88   | 1       | 0.20   | 1       | 0.26   | 1       |
| 0.22   | 1       | 0.21   | 1       | 0.36   | 1       | 0.28   | 1       | 0.27   | 1       |
| 0.20   | 1       | 0.19   | 1       | 6.43   | 1       | 0.21   | 1       | 0.29   | 1       |
| 0.20   | 1       | 0.19   | 1       | 0.29   | 1       | 0.18   | 1       | 0.67   | 1       |
| 0.19   | 1       | 0.18   | 1       | 1.73   | 1       | 0.25   | 1       | 0.28   | 1       |
| 0.22   | 1       | 0.19   | 1       | 0.30   | 1       | 0.21   | 1       | 0.36   | 1       |
| 0.19   | 1       | 0.23   | 1       | 0.53   | 1       | 0.28   | 1       | 6.01   | 1       |
| 0.20   | 1       | 2.95   | 0       | 0.25   | 1       | 0.20   | 1       | 0.33   | 1       |
| 0.20   | 1       | 10.47  | 1       | 0.25   | 1       | 0.27   | 1       | 0.24   | 1       |
| 0.21   | 1       | 0.24   | 1       | 0.20   | 1       | 0.21   | 1       | 0.28   | 1       |
| 0.19   | 1       | 0.36   | 1       | 6.25   | 0       | 0.21   | 1       | 0.26   | 1       |
| 0.17   | 1       | 0.19   | 1       | 1.12   | 0       | 0.37   | 1       | 0.28   | 1       |
| 4.03   | 0       | 0.18   | 1       | 5.05   | 0       | 0.17   | 1       | 0.24   | 1       |
| 1.99   | 1       | 0.18   | 1       | 1.17   | 1       | 0.34   | 1       | 0.30   | 1       |
| 0.27   | 1       | 0.17   | 1       | 0.28   | 1       | 0.20   | 1       | 0.29   | 1       |
| 0.20   | 1       | 0.19   | 1       | 0.25   | 1       | 0.23   | 1       | 0.27   | 1       |
| 0.20   | 1       | 0.17   | 1       | 0.66   | 1       | 0.43   | 1       | 0.27   | 1       |
| 0.21   | 1       | 0.17   | 1       | 0.26   | 1       | 0.35   | 1       | 63.90  | 0       |
| 0.18   | 1       | 0.18   | 1       | 0.22   | 1       | 0.41   | 1       | 4.15   | 1       |
| 0.18   | 1       | 0.18   | 1       | 0.23   | 1       | 0.21   | 1       | 0.36   | 1       |
| 0.22   | 1       | 0.20   | 1       | 0.55   | 1       | 0.39   | 1       | 0.26   | 1       |
| 0.19   | 1       | 0.16   | 1       | 0.26   | 1       | 0.26   | 1       | 0.24   | 1       |
| 0.30   | 1       | 0.16   | 1       | 0.24   | 1       | 0.63   | 1       | 9.03   | 1       |
| 0.18   | 1       | 0.61   | 0       | 0.88   | 1       | 0.34   | 1       | 0.28   | 1       |
| 0.19   | 1       | 5.18   | 1       | 0.25   | 1       | 0.78   | 1       | 0.27   | 1       |
| 5.30   | 1       | 0.30   | 1       | 0.36   | 1       | 6.54   | 0       | 0.25   | 1       |
| 0.23   | 1       | 0.20   | 1       | 0.22   | 1       | 6.53   | 0       | 0.93   | 1       |
| 0.20   | 1       | 0.17   | 1       | 0.22   | 1       | 20.14  | 0       | 0.29   | 1       |
| 0.19   | 1       | 0.18   | 1       | 7.74   | 1       | 1.66   | 0       | 0.04   | 1       |
| 0.19   | 1       | 0.18   | 1       | 0.27   | 1       | 18.13  | 1       | 0.01   | 1       |
| 0.16   | 1       | 0.13   | 1       | 0.26   | 1       | 0.73   | 1       | 0.25   | 1       |
| 0.22   | 1       | 0.24   | 1       | 0.22   | 1       | 0.42   | 1       | 0.49   | 1       |
| 0.26   | 1       | 0.20   | 1       | 2.15   | 0       | 0.23   | 1       | 0.39   | 1       |
| 0.17   | 1       | 0.21   | 1       | 6.76   | 1       | 0.20   | 1       | 0.62   | 1       |
| 0.19   | 1       | 0.19   | 1       | 0.30   | 1       | 0.21   | 1       | 0.27   | 1       |
| 0.10   | 1       | 0.19   | 1       | 0.23   | 1       | 0.17   | 1       | 0.30   | 1       |
| 0.18   | 1       | 0.19   | 1       | 0.24   | 1       | 0.44   | 1       | 0.29   | 1       |
| 0.42   | 1       | 0.17   | 1       | 0.23   | 1       | 0.21   | 1       | 0.05   | 1       |
| 2.13   | 1       | 0.18   | 1       | 0.38   | 1       | 0.20   | 1       | 0.23   | 1       |
| 0.25   | 1       | 4.33   | 0       | 0.23   | 1       | 0.18   | 1       | 0.29   | 1       |
| 0.19   | 1       | 3.46   | 1       | 0.26   | 1       | 0.38   | 1       | 0.29   | 1       |
| 0.19   | 1       | 0.28   | 1       | 0.45   | 1       | 0.28   | 1       | 0.30   | 1       |
| 0.21   | 1       | 0.18   | 1       | 0.27   | 1       | 0.20   | 1       | 0.03   | 1       |
| 0.18   | 1       | 0.18   | 1       | 0.20   | 1       | 0.22   | 1       | 2.04   | 0       |
| 0.21   | 1       | 0.18   | 1       | 5.43   | 0       | 0.20   | 1       | 7.61   | 0       |



| time A | leuko A | time A | leuko A | time B | leuko B | time D | leuko D | time E | leuko E |
|--------|---------|--------|---------|--------|---------|--------|---------|--------|---------|
| 0.17   | 1       | 0.09   | 1       | 1.59   | 0       | 0.31   | 1       | 10.07  | 1       |
| 0.07   | 1       | 0.25   | 1       | 7.65   | 1       | 0.19   | 1       | 0.33   | 1       |
| 0.11   | 1       | 0.33   | 1       | 0.27   | 1       | 0.23   | 1       | 0.42   | 1       |
| 0.26   | 1       | 0.32   | 1       | 0.23   | 1       | 0.19   | 1       | 0.27   | 1       |
| 0.11   | 1       | 0.17   | 1       | 0.23   | 1       | 0.19   | 1       | 0.28   | 1       |
| 0.18   | 1       | 0.20   | 1       | 1.84   | 1       | 10.02  | 0       | 0.28   | 1       |
| 0.21   | 1       | 0.20   | 1       | 0.23   | 1       | 3.99   | 0       | 0.33   | 1       |
| 3.19   | 1       | 0.17   | 1       | 0.23   | 1       | 1.97   | 0       | 0.60   | 1       |
| 0.40   | 1       | 2.58   | 1       | 3.93   | 0       | 15.88  | 1       | 0.62   | 1       |
| 0.27   | 1       | 0.24   | 1       | 5.86   | 0       | 0.21   | 1       | 0.33   | 1       |
| 0.18   | 1       | 0.18   | 1       | 5.53   | 1       | 0.44   | 1       | 6.29   | 0       |
| 0.19   | 1       | 0.19   | 1       | 0.29   | 1       | 0.20   | 1       | 14.78  | 1       |
| 0.20   | 1       | 0.18   | 1       | 0.26   | 1       | 0.53   | 1       | 0.27   | 1       |
| 0.18   | 1       | 0.19   | 1       | 1.27   | 1       | 0.19   | 1       | 0.28   | 1       |
| 0.18   | 1       | 0.19   | 1       | 0.25   | 1       | 0.67   | 1       | 0.30   | 1       |
| 0.20   | 1       | 0.18   | 1       | 0.24   | 1       | 0.22   | 1       | 0.31   | 1       |
| 0.18   | 1       | 0.18   | 1       | 0.20   | 1       | 0.42   | 1       | 0.34   | 1       |
| 0.22   | 1       | 0.17   | 1       | 0.28   | 1       | 0.22   | 1       | 0.48   | 1       |
| 0.20   | 1       | 0.19   | 1       | 0.95   | 1       | 0.22   | 1       | 0.07   | 1       |
| 0.19   | 1       | 0.19   | 1       | 9.19   | 1       | 0.23   | 1       | 0.28   | 1       |
| 0.23   | 1       | 0.20   | 1       | 0.27   | 1       | 0.19   | 1       | 10.05  | 0       |
| 2.77   | 1       | 3.26   | 0       | 0.22   | 1       | 0.24   | 1       | 14.47  | 1       |
| 0.26   | 1       | 2.90   | 1       | 0.68   | 1       | 0.22   | 1       | 0.29   | 1       |
| 0.20   | 1       | 0.26   | 1       | 0.20   | 1       | 0.25   | 1       | 0.29   | 1       |
| 0.21   | 1       | 0.19   | 1       | 0.38   | 1       | 0.23   | 1       | 0.25   | 1       |
| 0.19   | 1       | 0.19   | 1       | 0.83   | 1       | 4.27   | 0       | 0.04   | 1       |
| 0.20   | 1       | 0.19   | 1       | 4.50   | 0       | 1.61   | 0       | 0.24   | 1       |
| 0.19   | 1       | 0.18   | 1       | 2.73   | 0       | 1.23   | 0       | 0.05   | 1       |
| 0.19   | 1       | 0.19   | 1       | 0.33   | 0       | 9.28   | 0       | 0.01   | 1       |
| 0.09   | 1       | 0.18   | 1       | 5.86   | 1       | 1.24   | 0       | 0.02   | 1       |
| 0.10   | 1       | 0.19   | 1       | 0.26   | 1       | 3.52   | 0       | 0.19   | 1       |
| 4.62   | 0       | 0.19   | 1       | 0.22   | 1       | 1.75   | 0       | 0.26   | 1       |
| 7.52   | 0       | 0.20   | 1       | 0.18   | 1       | 0.29   | 0       | 0.26   | 1       |
| 8.37   | 0       | 0.39   | 1       | 1.62   | 1       | 5.05   | 0       | 10.21  | 0       |
| 3.60   | 1       | 6.26   | 1       | 0.23   | 1       | 4.12   | 1       | 5.88   | 0       |
| 0.40   | 1       | 0.27   | 1       | 0.18   | 1       | 0.19   | 1       | 7.24   | 1       |
| 0.29   | 1       | 0.19   | 1       | 0.19   | 1       | 0.14   | 1       | 0.27   | 1       |
| 0.23   | 1       | 0.19   | 1       | 17.49  | 1       | 0.17   | 1       | 0.25   | 1       |
| 0.22   | 1       | 0.20   | 1       | 0.27   | 1       | 0.69   | 1       | 0.29   | 1       |
| 0.44   | 1       | 0.20   | 1       | 1.11   | 1       | 0.23   | 1       | 0.27   | 1       |
| 0.22   | 1       | 0.13   | 1       | 0.22   | 1       | 0.22   | 1       | 0.30   | 1       |
| 3.30   | 0       | 0.27   | 1       | 0.57   | 1       | 0.24   | 1       | 0.30   | 1       |
| 5.13   | 1       | 0.21   | 1       | 0.25   | 1       | 0.38   | 1       | 0.30   | 1       |
| 0.29   | 1       | 0.16   | 1       | 0.22   | 1       | 0.26   | 1       | 0.28   | 1       |
| 0.23   | 1       | 0.17   | 1       | 0.20   | 1       | 0.22   | 1       | 0.26   | 1       |
| 0.20   | 1       | 0.10   | 1       | 14.93  | 1       | 0.21   | 1       | 0.37   | 1       |
| 0.21   | 1       | 0.24   | 1       | 0.22   | 1       | 0.20   | 1       | 19.52  | 1       |
| 0.22   | 1       | 0.22   | 1       | 0.22   | 1       | 0.17   | 1       | 0.33   | 1       |
| 0.21   | 1       | 0.20   | 1       | 0.19   | 1       | 0.23   | 1       | 0.29   | 1       |
| 0.21   | 1       | 0.18   | 1       | 1.08   | 1       | 0.20   | 1       | 0.26   | 1       |
| 0.19   | 1       | 0.18   | 1       | 0.22   | 1       | 0.23   | 1       | 0.25   | 1       |
| 0.20   | 1       | 0.22   | 1       | 0.20   | 1       | 0.31   | 1       | 0.27   | 1       |

| time A | leuko A | time A | leuko A | time B | leuko B | time D | leuko D | time E | leuko E |
|--------|---------|--------|---------|--------|---------|--------|---------|--------|---------|
| 0.19   | 1       | 0.18   | 1       | 0.20   | 1       | 3.93   | 0       | 0.29   | 1       |
| 0.20   | 1       | 4.48   | 1       | 0.42   | 1       | 2.16   | 0       | 0.24   | 1       |
| 0.21   | 1       | 0.24   | 1       | 0.22   | 1       | 1.32   | 0       | 0.31   | 1       |
| 0.22   | 1       | 0.19   | 1       | 0.21   | 1       | 7.20   | 0       | 0.26   | 1       |
| 0.19   | 1       | 0.22   | 1       | 0.19   | 1       | 0.96   | 0       | 0.26   | 1       |
| 0.22   | 1       | 0.20   | 1       | 16.40  | 0       | 1.02   | 0       | 8.44   | 0       |
| 11.23  | 1       | 0.24   | 1       | 0.72   | 0       | 2.18   | 0       | 10.51  | 1       |
| 0.24   | 1       | 0.21   | 1       | 3.38   | 1       | 14.53  | 1       | 0.55   | 1       |
| 0.21   | 1       | 0.21   | 1       | 0.28   | 1       | 0.22   | 1       | 0.33   | 1       |
| 0.21   | 1       | 0.20   | 1       | 1.01   | 1       | 0.22   | 1       | 0.27   | 1       |
| 0.20   | 1       | 0.17   | 1       | 0.24   | 1       | 0.23   | 1       | 0.28   | 1       |
| 0.20   | 1       | 0.18   | 1       | 6.54   | 1       | 0.19   | 1       | 0.27   | 1       |
| 0.20   | 1       | 0.17   | 1       | 0.24   | 1       | 0.32   | 1       | 0.09   | 1       |
| 0.13   | 1       | 0.19   | 1       | 0.21   | 1       | 0.20   | 1       | 24.14  | 1       |
| 0.26   | 1       | 0.21   | 1       | 0.22   | 1       | 0.20   | 1       | 0.27   | 1       |
| 0.26   | 1       | 0.17   | 1       | 0.19   | 1       | 0.28   | 1       | 0.27   | 1       |
| 0.20   | 1       | 0.21   | 1       | 3.29   | 1       | 0.22   | 1       | 0.26   | 1       |
| 0.20   | 1       | 0.20   | 1       | 0.24   | 1       | 0.22   | 1       | 0.01   | 1       |
| 0.19   | 1       | 0.17   | 1       | 0.21   | 1       | 0.21   | 1       | 0.28   | 1       |
| 0.22   | 1       | 0.17   | 1       | 0.20   | 1       | 0.20   | 1       | 0.07   | 1       |
| 0.18   | 1       | 0.59   | 0       | 0.20   | 1       | 0.19   | 1       | 0.26   | 1       |
| 0.16   | 1       | 0.23   | 0       | 1.35   | 0       | 0.21   | 1       | 0.01   | 1       |
| 13.57  | 1       | 0.28   | 0       | 18.46  | 1       | 0.20   | 1       | 0.18   | 1       |
| 0.35   | 1       | 4.54   | 1       | 0.29   | 1       | 0.19   | 1       | 0.01   | 1       |
| 0.28   | 1       | 0.26   | 1       | 0.71   | 1       | 0.20   | 1       | 0.29   | 1       |
| 0.41   | 1       | 0.21   | 1       | 0.60   | 1       | 0.19   | 1       | 0.08   | 1       |
| 0.25   | 1       | 0.19   | 1       | 0.24   | 1       | 0.20   | 1       | 0.18   | 1       |
| 0.20   | 1       | 0.20   | 1       | 0.23   | 1       | 0.21   | 1       | 4.68   | 0       |
| 0.20   | 1       | 0.18   | 1       | 0.20   | 1       | 0.20   | 1       | 11.21  | 1       |
| 0.18   | 1       | 0.17   | 1       | 0.20   | 1       | 0.29   | 1       | 0.29   | 1       |
| 0.20   | 1       | 0.19   | 1       | 14.29  | 1       | 0.22   | 1       | 0.26   | 1       |
| 0.21   | 1       | 0.20   | 1       | 0.22   | 1       | 0.19   | 1       | 0.27   | 1       |
| 14.55  | 1       | 0.17   | 1       | 0.50   | 1       | 0.20   | 1       | 0.26   | 1       |
| 0.28   | 1       | 0.18   | 1       | 0.26   | 1       | 0.27   | 1       | 0.25   | 1       |
| 0.20   | 1       | 0.19   | 1       | 0.23   | 1       | 0.29   | 1       | 0.27   | 1       |
| 0.21   | 1       | 0.19   | 1       | 0.22   | 1       | 0.17   | 1       | 0.29   | 1       |
| 0.20   | 1       | 0.19   | 1       | 0.19   | 1       | 0.17   | 1       | 0.29   | 1       |
| 0.19   | 1       | 0.19   | 1       | 0.25   | 1       | 1.58   | 0       | 0.45   | 1       |
| 0.21   | 1       | 2.77   | 0       | 7.75   | 1       | 12.82  | 0       | 5.97   | 0       |
| 0.20   | 1       | 3.41   | 0       | 0.24   | 1       | 6.79   | 1       | 9.47   | 1       |
| 0.19   | 1       | 3.77   | 1       | 0.83   | 1       | 0.19   | 1       | 0.31   | 1       |
| 0.21   | 1       | 0.26   | 1       | 0.22   | 1       | 0.29   | 1       | 0.25   | 1       |
| 0.20   | 1       | 0.21   | 1       | 8.16   | 1       | 0.28   | 1       | 0.29   | 1       |
| 0.22   | 1       | 0.21   | 1       | 0.27   | 1       | 0.28   | 1       | 0.27   | 1       |
| 0.21   | 1       | 0.09   | 1       | 0.22   | 1       | 0.41   | 1       | 0.24   | 1       |
| 0.21   | 1       | 0.28   | 1       | 0.22   | 1       | 0.33   | 1       | 0.27   | 1       |
| 0.22   | 1       | 0.18   | 1       | 0.20   | 1       | 0.20   | 1       | 0.26   | 1       |
| 0.20   | 1       | 0.19   | 1       | 0.33   | 1       | 0.20   | 1       | 0.27   | 1       |
| 0.23   | 1       | 0.19   | 1       | 0.21   | 1       | 0.18   | 1       | 0.27   | 1       |
| 0.20   | 1       | 0.18   | 1       | 3.82   | 0       | 0.17   | 1       | 0.25   | 1       |
| 0.18   | 1       | 0.19   | 1       | 13.60  | 1       | 0.21   | 1       | 0.06   | 1       |
| 0.17   | 1       | 0.22   | 1       | 0.24   | 1       | 0.18   | 1       | 0.19   | 1       |

| time A | leuko A | time A | leuko A | time B | leuko B | time D | leuko D | time E | leuko E |
|--------|---------|--------|---------|--------|---------|--------|---------|--------|---------|
| 7.65   | 1       | 3.75   | 1       | 4.06   | 0       | 0.18   | 1       | 0.08   | 1       |
| 0.37   | 1       | 0.24   | 1       | 0.70   | 1       | 0.15   | 1       | 0.18   | 1       |
| 0.25   | 1       | 0.31   | 1       | 0.31   | 1       | 0.18   | 1       | 0.01   | 1       |
| 0.22   | 1       | 0.21   | 1       | 0.23   | 1       | 0.18   | 1       | 0.23   | 1       |
| 0.23   | 1       | 0.17   | 1       | 0.21   | 1       | 0.17   | 1       | 0.05   | 1       |
| 0.21   | 1       | 0.18   | 1       | 0.40   | 1       | 0.18   | 1       | 24.25  | 1       |
| 0.21   | 1       | 0.16   | 1       | 4.93   | 1       | 0.17   | 1       | 0.28   | 1       |
| 0.20   | 1       | 0.16   | 1       | 0.26   | 1       | 0.18   | 1       | 0.28   | 1       |
| 0.22   | 1       | 0.19   | 1       | 0.59   | 1       | 0.20   | 1       | 0.26   | 1       |
| 0.20   | 1       | 0.19   | 1       | 7.16   | 1       | 0.19   | 1       | 0.06   | 1       |
| 0.19   | 1       | 0.20   | 1       | 0.27   | 1       | 0.16   | 1       | 0.20   | 1       |
| 0.19   | 1       | 0.19   | 1       | 9.78   | 1       | 0.18   | 1       | 0.29   | 1       |
| 8.27   | 1       | 0.19   | 1       | 0.27   | 1       | 0.16   | 1       | 0.32   | 1       |
| 0.30   | 1       | 0.21   | 1       | 0.23   | 1       | 0.16   | 1       | 0.57   | 1       |
| 0.22   | 1       | 0.20   | 1       | 0.73   | 1       | 0.51   | 1       | 0.31   | 1       |
| 0.20   | 1       | 0.40   | 1       | 5.80   | 0       | 15.72  | 0       | 0.29   | 1       |
| 0.22   | 1       | 8.99   | 1       | 2.25   | 0       | 14.77  | 1       | 0.02   | 1       |
| 0.20   | 1       | 0.25   | 1       | 1.97   | 1       | 0.22   | 1       | 1.07   | 0       |
| 0.20   | 1       | 0.20   | 1       | 0.29   | 1       | 0.19   | 1       | 15.38  | 1       |
| 0.23   | 1       | 0.20   | 1       | 0.22   | 1       | 0.37   | 1       | 0.28   | 1       |
| 0.21   | 1       | 0.21   | 1       | 0.21   | 1       | 0.21   | 1       | 0.30   | 1       |
| 0.24   | 1       | 0.36   | 1       | 0.27   | 1       | 0.20   | 1       | 0.27   | 1       |
| 0.20   | 1       | 0.22   | 1       | 4.12   | 1       | 0.18   | 1       | 0.26   | 1       |
| 0.27   | 1       | 0.21   | 1       | 1.05   | 1       | 0.31   | 1       | 0.56   | 1       |
| 0.29   | 1       | 0.19   | 1       | 0.64   | 1       | 0.23   | 1       | 0.29   | 1       |
| 0.21   | 1       | 0.20   | 1       | 15.53  | 1       | 0.20   | 1       | 0.31   | 1       |
| 0.18   | 1       | 0.19   | 1       | 0.80   | 0       | 0.20   | 1       | 0.40   | 1       |
| 11.18  | 1       | 0.19   | 1       | 8.48   | 1       | 0.23   | 1       | 25.88  | 1       |
| 0.30   | 1       | 0.19   | 1       | 0.33   | 1       | 0.18   | 1       | 0.30   | 1       |
| 0.26   | 1       | 0.19   | 1       | 8.11   | 1       | 0.27   | 1       | 0.34   | 1       |
| 0.23   | 1       | 1.94   | 0       | 0.34   | 1       | 0.21   | 1       | 0.31   | 1       |
| 0.23   | 1       | 3.74   | 0       | 0.43   | 1       | 0.21   | 1       | 0.31   | 1       |
| 0.23   | 1       | 3.06   | 1       | 0.27   | 1       | 0.21   | 1       | 0.30   | 1       |
| 0.20   | 1       | 0.24   | 1       | 6.79   | 0       | 0.18   | 1       | 0.30   | 1       |
| 0.20   | 1       | 0.18   | 1       | 3.90   | 1       | 0.20   | 1       | 0.26   | 1       |
| 0.23   | 1       | 0.19   | 1       | 0.38   | 1       | 0.21   | 1       | 0.31   | 1       |
| 0.17   | 1       | 0.19   | 1       | 0.49   | 1       | 0.20   | 1       | 0.33   | 1       |
| 0.20   | 1       | 0.18   | 1       | 0.24   | 1       | 0.23   | 1       | 0.26   | 1       |
| 0.21   | 1       | 0.17   | 1       | 0.24   | 1       | 0.21   | 1       | 0.01   | 1       |
| 6.67   | 1       | 0.18   | 1       | 0.37   | 1       | 0.22   | 1       | 2.10   | 0       |
| 0.27   | 1       | 0.20   | 1       | 0.27   | 1       | 0.20   | 1       | 7.27   | 0       |
| 0.21   | 1       | 0.22   | 1       | 0.22   | 1       | 0.19   | 1       | 0.36   | 0       |
| 0.19   | 1       | 0.23   | 1       | 0.23   | 1       | 0.18   | 1       | 11.90  | 1       |
| 0.19   | 1       | 0.50   | 0       | 0.32   | 1       | 0.18   | 1       | 0.26   | 1       |
| 0.18   | 1       | 3.49   | 1       | 0.20   | 1       | 0.15   | 1       | 0.11   | 1       |
| 0.13   | 1       | 0.22   | 1       | 0.22   | 1       | 1.07   | 0       | 0.15   | 1       |
| 0.27   | 1       | 0.20   | 1       | 4.69   | 0       | 6.25   | 0       | 0.45   | 1       |
| 0.21   | 1       | 0.18   | 1       | 13.49  | 0       | 13.20  | 1       | 0.28   | 1       |
| 0.17   | 1       | 0.17   | 1       | 1.01   | 1       | 0.20   | 1       | 0.40   | 1       |
| 11.36  | 1       | 0.21   | 1       | 0.27   | 1       | 0.19   | 1       | 0.31   | 1       |
| 0.25   | 1       | 0.17   | 1       | 0.24   | 1       | 0.25   | 1       | 0.33   | 1       |
| 0.18   | 1       | 0.23   | 1       | 1.89   | 1       | 0.18   | 1       | 0.27   | 1       |

| time A | leuko A | time A | leuko A | time B | leuko B | time D | leuko D | time E | leuko E |
|--------|---------|--------|---------|--------|---------|--------|---------|--------|---------|
| 0.17   | 1       | 0.24   | 1       | 0.26   | 1       | 0.21   | 1       | 0.24   | 1       |
| 0.18   | 1       | 0.19   | 1       | 0.23   | 1       | 0.17   | 1       | 24.25  | 1       |
| 0.18   | 1       | 0.16   | 1       | 9.70   | 1       | 0.20   | 1       | 0.34   | 1       |
| 0.17   | 1       | 8.87   | 0       | 0.22   | 1       | 0.20   | 1       | 0.77   | 1       |
| 0.17   | 1       | 2.54   | 1       | 0.20   | 1       | 0.25   | 1       | 0.31   | 1       |
| 0.19   | 1       | 0.25   | 1       | 0.23   | 1       | 0.18   | 1       | 0.29   | 1       |
| 0.17   | 1       | 0.20   | 1       | 2.03   | 1       | 0.19   | 1       | 0.29   | 1       |
| 0.18   | 1       | 0.17   | 1       | 0.21   | 1       | 0.54   | 1       | 0.31   | 1       |
| 0.20   | 1       | 0.17   | 1       | 0.20   | 1       | 0.20   | 1       | 16.65  | 0       |
| 0.21   | 1       | 0.18   | 1       | 0.19   | 1       | 0.21   | 1       | 13.19  | 1       |
| 0.21   | 1       | 0.18   | 1       | 6.24   | 0       | 0.18   | 1       | 0.24   | 1       |
| 0.20   | 1       | 0.18   | 1       | 2.99   | 0       | 0.23   | 1       | 0.32   | 1       |
| 0.36   | 1       | 0.18   | 1       | 8.93   | 0       | 0.19   | 1       | 0.30   | 1       |
| 0.17   | 1       | 0.19   | 1       | 0.86   | 0       | 0.20   | 1       | 0.29   | 1       |
| 0.21   | 1       | 0.17   | 1       | 2.57   | 1       | 0.17   | 1       | 0.27   | 1       |
| 0.20   | 1       | 0.18   | 1       | 0.27   | 1       | 0.18   | 1       | 0.27   | 1       |
| 0.17   | 1       | 0.18   | 1       | 0.21   | 1       | 0.25   | 1       | 0.09   | 1       |
| 35.48  | 1       | 0.20   | 1       | 0.19   | 1       | 0.22   | 1       | 0.18   | 1       |
| 0.26   | 1       | 0.25   | 1       | 0.48   | 1       | 0.22   | 1       | 0.01   | 1       |
| 0.21   | 1       | 0.20   | 1       | 0.26   | 1       | 0.20   | 1       | 0.01   | 1       |
| 0.20   | 1       | NA     | NA      | 0.41   | 1       | 0.20   | 1       | 0.28   | 1       |
| 0.21   | 1       | NA     | NA      | 0.22   | 1       | 0.18   | 1       | 0.03   | 1       |
| 0.22   | 1       | NA     | NA      | 0.20   | 1       | 0.16   | 1       | 0.01   | 1       |
| 0.20   | 1       | NA     | NA      | 0.21   | 1       | 10.83  | 0       | 0.18   | 1       |
| 0.22   | 1       | NA     | NA      | 5.48   | 0       | 2.30   | 0       | 0.06   | 1       |
| 0.19   | 1       | NA     | NA      | 2.28   | 1       | 17.81  | 1       | 0.01   | 1       |
| 0.18   | 1       | NA     | NA      | 0.21   | 1       | 0.22   | 1       | 0.16   | 1       |
| 0.19   | 1       | NA     | NA      | 0.22   | 1       | 0.42   | 1       | 0.44   | 1       |
| 0.15   | 1       | NA     | NA      | 0.21   | 1       | 0.21   | 1       | 0.30   | 1       |
| 18.18  | 1       | NA     | NA      | 0.19   | 1       | 0.30   | 1       | 0.30   | 1       |
| 0.35   | 1       | NA     | NA      | 0.65   | 1       | 0.18   | 1       | 0.39   | 1       |
| 0.25   | 1       | NA     | NA      | 0.19   | 1       | 0.19   | 1       | 0.05   | 1       |
| 0.19   | 1       | NA     | NA      | 0.50   | 1       | 0.32   | 1       | 2.02   | 0       |
| 0.22   | 1       | NA     | NA      | 0.25   | 1       | 0.25   | 1       | 7.55   | 0       |
| 0.21   | 1       | NA     | NA      | 0.24   | 1       | 0.27   | 1       | 2.19   | 0       |
| 0.08   | 1       | NA     | NA      | 0.21   | 1       | 0.18   | 1       | 5.01   | 0       |
| 0.10   | 1       | NA     | NA      | 0.64   | 1       | 0.21   | 1       | NA     | NA      |
| 0.18   | 1       | NA     | NA      | 0.28   | 1       | 0.22   | 1       | NA     | NA      |
| 0.18   | 1       | NA     | NA      | 0.22   | 1       | 0.19   | 1       | NA     | NA      |
| 0.20   | 1       | NA     | NA      | 0.96   | 0       | 0.22   | 1       | NA     | NA      |
| 0.18   | 1       | NA     | NA      | NA     | NA      | 0.19   | 1       | NA     | NA      |
| 0.21   | 1       | NA     | NA      | NA     | NA      | 0.91   | 1       | NA     | NA      |
| 0.21   | 1       | NA     | NA      | NA     | NA      | 0.24   | 1       | NA     | NA      |
| 0.18   | 1       | NA     | NA      | NA     | NA      | 0.21   | 1       | NA     | NA      |
| 0.20   | 1       | NA     | NA      | NA     | NA      | 0.20   | 1       | NA     | NA      |
| 0.19   | 1       | NA     | NA      | NA     | NA      | 0.25   | 1       | NA     | NA      |
| 0.20   | 1       | NA     | NA      | NA     | NA      | 0.23   | 1       | NA     | NA      |
| 0.14   | 1       | NA     | NA      | NA     | NA      | 2.13   | 0       | NA     | NA      |
| 9.31   | 0       | NA     | NA      | NA     | NA      | 22.67  | 1       | NA     | NA      |
| 5.09   | 1       | NA     | NA      | NA     | NA      | 0.20   | 1       | NA     | NA      |
| 0.26   | 1       | NA     | NA      | NA     | NA      | 0.35   | 1       | NA     | NA      |
| 0.19   | 1       | NA     | NA      | NA     | NA      | 0.21   | 1       | NA     | NA      |

| time A | leuko A | time A | leuko A | time B | leuko B | time D | leuko D | time E | leuko E |
|--------|---------|--------|---------|--------|---------|--------|---------|--------|---------|
| 0.21   | 1       | NA     | NA      | NA     | NA      | 0.22   | 1       | NA     | NA      |
| 0.17   | 1       | NA     | NA      | NA     | NA      | 0.22   | 1       | NA     | NA      |
| 0.36   | 1       | NA     | NA      | NA     | NA      | 0.19   | 1       | NA     | NA      |
| 0.22   | 1       | NA     | NA      | NA     | NA      | 0.18   | 1       | NA     | NA      |
| 0.18   | 1       | NA     | NA      | NA     | NA      | 0.20   | 1       | NA     | NA      |
| 0.18   | 1       | NA     | NA      | NA     | NA      | 0.21   | 1       | NA     | NA      |
| 0.21   | 1       | NA     | NA      | NA     | NA      | 0.19   | 1       | NA     | NA      |
| 0.18   | 1       | NA     | NA      | NA     | NA      | 0.21   | 1       | NA     | NA      |
| 0.18   | 1       | NA     | NA      | NA     | NA      | 0.51   | 1       | NA     | NA      |
| 0.21   | 1       | NA     | NA      | NA     | NA      | 0.22   | 1       | NA     | NA      |
| 6.95   | 1       | NA     | NA      | NA     | NA      | 0.19   | 1       | NA     | NA      |
| 0.29   | 1       | NA     | NA      | NA     | NA      | 0.21   | 1       | NA     | NA      |
| 0.21   | 1       | NA     | NA      | NA     | NA      | 0.22   | 1       | NA     | NA      |
| 0.22   | 1       | NA     | NA      | NA     | NA      | 0.20   | 1       | NA     | NA      |
| 0.16   | 1       | NA     | NA      | NA     | NA      | 0.21   | 1       | NA     | NA      |
| 0.32   | 1       | NA     | NA      | NA     | NA      | 0.23   | 1       | NA     | NA      |
| 0.12   | 1       | NA     | NA      | NA     | NA      | 0.21   | 1       | NA     | NA      |
| 0.21   | 1       | NA     | NA      | NA     | NA      | 3.41   | 0       | NA     | NA      |
| 0.24   | 1       | NA     | NA      | NA     | NA      | 0.26   | 0       | NA     | NA      |
| 0.19   | 1       | NA     | NA      | NA     | NA      | 0.77   | 0       | NA     | NA      |
| 0.21   | 1       | NA     | NA      | NA     | NA      | 2.62   | 0       | NA     | NA      |
| 0.22   | 1       | NA     | NA      | NA     | NA      | 6.57   | 0       | NA     | NA      |
| 19.81  | 1       | NA     | NA      | NA     | NA      | 3.96   | 0       | NA     | NA      |
| 0.28   | 1       | NA     | NA      | NA     | NA      | NA     | NA      | NA     | NA      |
| 0.19   | 1       | NA     | NA      | NA     | NA      | NA     | NA      | NA     | NA      |
| 0.20   | 1       | NA     | NA      | NA     | NA      | NA     | NA      | NA     | NA      |
| 0.21   | 1       | NA     | NA      | NA     | NA      | NA     | NA      | NA     | NA      |
| 0.21   | 1       | NA     | NA      | NA     | NA      | NA     | NA      | NA     | NA      |
| 0.21   | 1       | NA     | NA      | NA     | NA      | NA     | NA      | NA     | NA      |
| 0.21   | 1       | NA     | NA      | NA     | NA      | NA     | NA      | NA     | NA      |
| 0.20   | 1       | NA     | NA      | NA     | NA      | NA     | NA      | NA     | NA      |
| 0.03   | 1       | NA     | NA      | NA     | NA      | NA     | NA      | NA     | NA      |
| 0.03   | 1       | NA     | NA      | NA     | NA      | NA     | NA      | NA     | NA      |
| 0.11   | 1       | NA     | NA      | NA     | NA      | NA     | NA      | NA     | NA      |
| 0.07   | 1       | NA     | NA      | NA     | NA      | NA     | NA      | NA     | NA      |
| 0.09   | 1       | NA     | NA      | NA     | NA      | NA     | NA      | NA     | NA      |
| 0.19   | 1       | NA     | NA      | NA     | NA      | NA     | NA      | NA     | NA      |
| 0.22   | 1       | NA     | NA      | NA     | NA      | NA     | NA      | NA     | NA      |
| 0.41   | 1       | NA     | NA      | NA     | NA      | NA     | NA      | NA     | NA      |
| 1.28   | 0       | NA     | NA      | NA     | NA      | NA     | NA      | NA     | NA      |
| 2.75   | 0       | NA     | NA      | NA     | NA      | NA     | NA      | NA     | NA      |
| 6.27   | 1       | NA     | NA      | NA     | NA      | NA     | NA      | NA     | NA      |
| 0.29   | 1       | NA     | NA      | NA     | NA      | NA     | NA      | NA     | NA      |
| 0.17   | 1       | NA     | NA      | NA     | NA      | NA     | NA      | NA     | NA      |
| 0.17   | 1       | NA     | NA      | NA     | NA      | NA     | NA      | NA     | NA      |
| 0.18   | 1       | NA     | NA      | NA     | NA      | NA     | NA      | NA     | NA      |
| 0.17   | 1       | NA     | NA      | NA     | NA      | NA     | NA      | NA     | NA      |
| 0.19   | 1       | NA     | NA      | NA     | NA      | NA     | NA      | NA     | NA      |
| 0.27   | 1       | NA     | NA      | NA     | NA      | NA     | NA      | NA     | NA      |
| 0.20   | 1       | NA     | NA      | NA     | NA      | NA     | NA      | NA     | NA      |
| 0.17   | 1       | NA     | NA      | NA     | NA      | NA     | NA      | NA     | NA      |
| 0.16   | 1       | NA     | NA      | NA     | NA      | NA     | NA      | NA     | NA      |
| 0.19   | 1       | NA     | NA      | NA     | NA      | NA     | NA      | NA     | NA      |

| time A | leuko A | time A | leuko A | time B | leuko B | time D | leuko D | time E | leuko E |
|--------|---------|--------|---------|--------|---------|--------|---------|--------|---------|
| 0.18   | 1       | NA     | NA      | NA     | NA      | NA     | NA      | NA     | NA      |
| 0.15   | 1       | NA     | NA      | NA     | NA      | NA     | NA      | NA     | NA      |
| 0.17   | 1       | NA     | NA      | NA     | NA      | NA     | NA      | NA     | NA      |
| 0.15   | 1       | NA     | NA      | NA     | NA      | NA     | NA      | NA     | NA      |
| 2.79   | 0       | NA     | NA      | NA     | NA      | NA     | NA      | NA     | NA      |
| 6.26   | 1       | NA     | NA      | NA     | NA      | NA     | NA      | NA     | NA      |
| 0.26   | 1       | NA     | NA      | NA     | NA      | NA     | NA      | NA     | NA      |
| 0.17   | 1       | NA     | NA      | NA     | NA      | NA     | NA      | NA     | NA      |
| 0.18   | 1       | NA     | NA      | NA     | NA      | NA     | NA      | NA     | NA      |
| 0.17   | 1       | NA     | NA      | NA     | NA      | NA     | NA      | NA     | NA      |
| 0.19   | 1       | NA     | NA      | NA     | NA      | NA     | NA      | NA     | NA      |
| 0.18   | 1       | NA     | NA      | NA     | NA      | NA     | NA      | NA     | NA      |
| 0.17   | 1       | NA     | NA      | NA     | NA      | NA     | NA      | NA     | NA      |
| 0.19   | 1       | NA     | NA      | NA     | NA      | NA     | NA      | NA     | NA      |
| 0.22   | 1       | NA     | NA      | NA     | NA      | NA     | NA      | NA     | NA      |
| 0.21   | 1       | NA     | NA      | NA     | NA      | NA     | NA      | NA     | NA      |
| 0.20   | 1       | NA     | NA      | NA     | NA      | NA     | NA      | NA     | NA      |
| 0.31   | 1       | NA     | NA      | NA     | NA      | NA     | NA      | NA     | NA      |
| 0.20   | 1       | NA     | NA      | NA     | NA      | NA     | NA      | NA     | NA      |
| 0.18   | 1       | NA     | NA      | NA     | NA      | NA     | NA      | NA     | NA      |
| 0.17   | 1       | NA     | NA      | NA     | NA      | NA     | NA      | NA     | NA      |
| 0.19   | 1       | NA     | NA      | NA     | NA      | NA     | NA      | NA     | NA      |
| 0.21   | 1       | NA     | NA      | NA     | NA      | NA     | NA      | NA     | NA      |
| 4.81   | 1       | NA     | NA      | NA     | NA      | NA     | NA      | NA     | NA      |
| 0.24   | 1       | NA     | NA      | NA     | NA      | NA     | NA      | NA     | NA      |
| 0.19   | 1       | NA     | NA      | NA     | NA      | NA     | NA      | NA     | NA      |
| 0.19   | 1       | NA     | NA      | NA     | NA      | NA     | NA      | NA     | NA      |
| 0.18   | 1       | NA     | NA      | NA     | NA      | NA     | NA      | NA     | NA      |
| 0.19   | 1       | NA     | NA      | NA     | NA      | NA     | NA      | NA     | NA      |
| 0.18   | 1       | NA     | NA      | NA     | NA      | NA     | NA      | NA     | NA      |
| 0.17   | 1       | NA     | NA      | NA     | NA      | NA     | NA      | NA     | NA      |
| 0.20   | 1       | NA     | NA      | NA     | NA      | NA     | NA      | NA     | NA      |
| 0.16   | 1       | NA     | NA      | NA     | NA      | NA     | NA      | NA     | NA      |
| 0.18   | 1       | NA     | NA      | NA     | NA      | NA     | NA      | NA     | NA      |
| 0.16   | 1       | NA     | NA      | NA     | NA      | NA     | NA      | NA     | NA      |
| 0.14   | 1       | NA     | NA      | NA     | NA      | NA     | NA      | NA     | NA      |
| 0.15   | 1       | NA     | NA      | NA     | NA      | NA     | NA      | NA     | NA      |
| 0.36   | 1       | NA     | NA      | NA     | NA      | NA     | NA      | NA     | NA      |
| 0.20   | 1       | NA     | NA      | NA     | NA      | NA     | NA      | NA     | NA      |
| 0.17   | 1       | NA     | NA      | NA     | NA      | NA     | NA      | NA     | NA      |
| 0.18   | 1       | NA     | NA      | NA     | NA      | NA     | NA      | NA     | NA      |
| 0.20   | 1       | NA     | NA      | NA     | NA      | NA     | NA      | NA     | NA      |
| 0.18   | 1       | NA     | NA      | NA     | NA      | NA     | NA      | NA     | NA      |
| 6.98   | 1       | NA     | NA      | NA     | NA      | NA     | NA      | NA     | NA      |
| 0.31   | 1       | NA     | NA      | NA     | NA      | NA     | NA      | NA     | NA      |
| 0.22   | 1       | NA     | NA      | NA     | NA      | NA     | NA      | NA     | NA      |
| 0.17   | 1       | NA     | NA      | NA     | NA      | NA     | NA      | NA     | NA      |
| 0.19   | 1       | NA     | NA      | NA     | NA      | NA     | NA      | NA     | NA      |
| 0.36   | 1       | NA     | NA      | NA     | NA      | NA     | NA      | NA     | NA      |
| 0.21   | 1       | NA     | NA      | NA     | NA      | NA     | NA      | NA     | NA      |
| 0.17   | 1       | NA     | NA      | NA     | NA      | NA     | NA      | NA     | NA      |
| 0.18   | 1       | NA     | NA      | NA     | NA      | NA     | NA      | NA     | NA      |

| time A | leuko A | time A | leuko A | time B | leuko B | time D | leuko D | time E | leuko E |
|--------|---------|--------|---------|--------|---------|--------|---------|--------|---------|
| 0.20   | 1       | NA     | NA      | NA     | NA      | NA     | NA      | NA     | NA      |
| 0.18   | 1       | NA     | NA      | NA     | NA      | NA     | NA      | NA     | NA      |
| 0.19   | 1       | NA     | NA      | NA     | NA      | NA     | NA      | NA     | NA      |
| 0.19   | 1       | NA     | NA      | NA     | NA      | NA     | NA      | NA     | NA      |
| 0.16   | 1       | NA     | NA      | NA     | NA      | NA     | NA      | NA     | NA      |
| 6.04   | 1       | NA     | NA      | NA     | NA      | NA     | NA      | NA     | NA      |
| 0.25   | 1       | NA     | NA      | NA     | NA      | NA     | NA      | NA     | NA      |
| 0.19   | 1       | NA     | NA      | NA     | NA      | NA     | NA      | NA     | NA      |
| 0.18   | 1       | NA     | NA      | NA     | NA      | NA     | NA      | NA     | NA      |
| 0.19   | 1       | NA     | NA      | NA     | NA      | NA     | NA      | NA     | NA      |
| 0.18   | 1       | NA     | NA      | NA     | NA      | NA     | NA      | NA     | NA      |
| 0.20   | 1       | NA     | NA      | NA     | NA      | NA     | NA      | NA     | NA      |
| 0.19   | 1       | NA     | NA      | NA     | NA      | NA     | NA      | NA     | NA      |
| 0.22   | 1       | NA     | NA      | NA     | NA      | NA     | NA      | NA     | NA      |
| 0.28   | 1       | NA     | NA      | NA     | NA      | NA     | NA      | NA     | NA      |
| 0.19   | 1       | NA     | NA      | NA     | NA      | NA     | NA      | NA     | NA      |
| 0.19   | 1       | NA     | NA      | NA     | NA      | NA     | NA      | NA     | NA      |
| 0.21   | 1       | NA     | NA      | NA     | NA      | NA     | NA      | NA     | NA      |
| 0.16   | 1       | NA     | NA      | NA     | NA      | NA     | NA      | NA     | NA      |
| 0.18   | 1       | NA     | NA      | NA     | NA      | NA     | NA      | NA     | NA      |
| 0.14   | 1       | NA     | NA      | NA     | NA      | NA     | NA      | NA     | NA      |
| 0.20   | 1       | NA     | NA      | NA     | NA      | NA     | NA      | NA     | NA      |
| 0.71   | 1       | NA     | NA      | NA     | NA      | NA     | NA      | NA     | NA      |
| 0.30   | 1       | NA     | NA      | NA     | NA      | NA     | NA      | NA     | NA      |
| 0.22   | 1       | NA     | NA      | NA     | NA      | NA     | NA      | NA     | NA      |
| 0.68   | 0       | NA     | NA      | NA     | NA      | NA     | NA      | NA     | NA      |
| 1.04   | 0       | NA     | NA      | NA     | NA      | NA     | NA      | NA     | NA      |
| 5.91   | 0       | NA     | NA      | NA     | NA      | NA     | NA      | NA     | NA      |
| 8.21   | 1       | NA     | NA      | NA     | NA      | NA     | NA      | NA     | NA      |
| 0.30   | 1       | NA     | NA      | NA     | NA      | NA     | NA      | NA     | NA      |
| 0.21   | 1       | NA     | NA      | NA     | NA      | NA     | NA      | NA     | NA      |
| 0.19   | 1       | NA     | NA      | NA     | NA      | NA     | NA      | NA     | NA      |
| 0.21   | 1       | NA     | NA      | NA     | NA      | NA     | NA      | NA     | NA      |
| 0.27   | 1       | NA     | NA      | NA     | NA      | NA     | NA      | NA     | NA      |
| 0.27   | 1       | NA     | NA      | NA     | NA      | NA     | NA      | NA     | NA      |
| 0.28   | 1       | NA     | NA      | NA     | NA      | NA     | NA      | NA     | NA      |
| 0.24   | 1       | NA     | NA      | NA     | NA      | NA     | NA      | NA     | NA      |
| 0.20   | 1       | NA     | NA      | NA     | NA      | NA     | NA      | NA     | NA      |
| 0.18   | 1       | NA     | NA      | NA     | NA      | NA     | NA      | NA     | NA      |
| 0.22   | 1       | NA     | NA      | NA     | NA      | NA     | NA      | NA     | NA      |
| 0.18   | 1       | NA     | NA      | NA     | NA      | NA     | NA      | NA     | NA      |
| 0.19   | 1       | NA     | NA      | NA     | NA      | NA     | NA      | NA     | NA      |
| 0.21   | 1       | NA     | NA      | NA     | NA      | NA     | NA      | NA     | NA      |
| 0.20   | 1       | NA     | NA      | NA     | NA      | NA     | NA      | NA     | NA      |
| 0.25   | 1       | NA     | NA      | NA     | NA      | NA     | NA      | NA     | NA      |
| 0.24   | 1       | NA     | NA      | NA     | NA      | NA     | NA      | NA     | NA      |
| 0.22   | 1       | NA     | NA      | NA     | NA      | NA     | NA      | NA     | NA      |
| 0.32   | 1       | NA     | NA      | NA     | NA      | NA     | NA      | NA     | NA      |
| 25.73  | 1       | NA     | NA      | NA     | NA      | NA     | NA      | NA     | NA      |
| 0.30   | 1       | NA     | NA      | NA     | NA      | NA     | NA      | NA     | NA      |
| 0.21   | 1       | NA     | NA      | NA     | NA      | NA     | NA      | NA     | NA      |
| 0.10   | 1       | NA     | NA      | NA     | NA      | NA     | NA      | NA     | NA      |

| time A | leuko A | time A | leuko A | time B | leuko B | time D | leuko D | time E | leuko E |
|--------|---------|--------|---------|--------|---------|--------|---------|--------|---------|
| 0.08   | 1       | NA     | NA      | NA     | NA      | NA     | NA      | NA     | NA      |
| 0.10   | 1       | NA     | NA      | NA     | NA      | NA     | NA      | NA     | NA      |
| 0.09   | 1       | NA     | NA      | NA     | NA      | NA     | NA      | NA     | NA      |
| 0.09   | 1       | NA     | NA      | NA     | NA      | NA     | NA      | NA     | NA      |
| 0.12   | 1       | NA     | NA      | NA     | NA      | NA     | NA      | NA     | NA      |
| 0.06   | 1       | NA     | NA      | NA     | NA      | NA     | NA      | NA     | NA      |
| 0.09   | 1       | NA     | NA      | NA     | NA      | NA     | NA      | NA     | NA      |
| 0.64   | 0       | NA     | NA      | NA     | NA      | NA     | NA      | NA     | NA      |
| 5.70   | 0       | NA     | NA      | NA     | NA      | NA     | NA      | NA     | NA      |
| 4.74   | 1       | NA     | NA      | NA     | NA      | NA     | NA      | NA     | NA      |
| 0.24   | 1       | NA     | NA      | NA     | NA      | NA     | NA      | NA     | NA      |
| 0.19   | 1       | NA     | NA      | NA     | NA      | NA     | NA      | NA     | NA      |
| 0.17   | 1       | NA     | NA      | NA     | NA      | NA     | NA      | NA     | NA      |
| 0.18   | 1       | NA     | NA      | NA     | NA      | NA     | NA      | NA     | NA      |
| 0.19   | 1       | NA     | NA      | NA     | NA      | NA     | NA      | NA     | NA      |
| 0.17   | 1       | NA     | NA      | NA     | NA      | NA     | NA      | NA     | NA      |
| 0.17   | 1       | NA     | NA      | NA     | NA      | NA     | NA      | NA     | NA      |
| 0.01   | 1       | NA     | NA      | NA     | NA      | NA     | NA      | NA     | NA      |
| 0.17   | 1       | NA     | NA      | NA     | NA      | NA     | NA      | NA     | NA      |
| 0.20   | 1       | NA     | NA      | NA     | NA      | NA     | NA      | NA     | NA      |
| 0.19   | 1       | NA     | NA      | NA     | NA      | NA     | NA      | NA     | NA      |
| 0.19   | 1       | NA     | NA      | NA     | NA      | NA     | NA      | NA     | NA      |
| 0.16   | 1       | NA     | NA      | NA     | NA      | NA     | NA      | NA     | NA      |
| 0.18   | 1       | NA     | NA      | NA     | NA      | NA     | NA      | NA     | NA      |
| 0.19   | 1       | NA     | NA      | NA     | NA      | NA     | NA      | NA     | NA      |
| 2.37   | 1       | NA     | NA      | NA     | NA      | NA     | NA      | NA     | NA      |
| 0.27   | 1       | NA     | NA      | NA     | NA      | NA     | NA      | NA     | NA      |
| 0.51   | 1       | NA     | NA      | NA     | NA      | NA     | NA      | NA     | NA      |
| 0.21   | 1       | NA     | NA      | NA     | NA      | NA     | NA      | NA     | NA      |
| 0.17   | 1       | NA     | NA      | NA     | NA      | NA     | NA      | NA     | NA      |
| 0.18   | 1       | NA     | NA      | NA     | NA      | NA     | NA      | NA     | NA      |
| 0.16   | 1       | NA     | NA      | NA     | NA      | NA     | NA      | NA     | NA      |
| 0.16   | 1       | NA     | NA      | NA     | NA      | NA     | NA      | NA     | NA      |
| 0.16   | 1       | NA     | NA      | NA     | NA      | NA     | NA      | NA     | NA      |
| 0.40   | 1       | NA     | NA      | NA     | NA      | NA     | NA      | NA     | NA      |
| 0.28   | 1       | NA     | NA      | NA     | NA      | NA     | NA      | NA     | NA      |
| 0.18   | 1       | NA     | NA      | NA     | NA      | NA     | NA      | NA     | NA      |
| 0.18   | 1       | NA     | NA      | NA     | NA      | NA     | NA      | NA     | NA      |
| 0.18   | 1       | NA     | NA      | NA     | NA      | NA     | NA      | NA     | NA      |
| 0.19   | 1       | NA     | NA      | NA     | NA      | NA     | NA      | NA     | NA      |
| 0.18   | 1       | NA     | NA      | NA     | NA      | NA     | NA      | NA     | NA      |
| 0.17   | 1       | NA     | NA      | NA     | NA      | NA     | NA      | NA     | NA      |
| 0.19   | 1       | NA     | NA      | NA     | NA      | NA     | NA      | NA     | NA      |
| 0.15   | 1       | NA     | NA      | NA     | NA      | NA     | NA      | NA     | NA      |
| 0.16   | 1       | NA     | NA      | NA     | NA      | NA     | NA      | NA     | NA      |
| 0.18   | 1       | NA     | NA      | NA     | NA      | NA     | NA      | NA     | NA      |
| 20.87  | 1       | NA     | NA      | NA     | NA      | NA     | NA      | NA     | NA      |
| 0.25   | 1       | NA     | NA      | NA     | NA      | NA     | NA      | NA     | NA      |
| 0.20   | 1       | NA     | NA      | NA     | NA      | NA     | NA      | NA     | NA      |
| 0.20   | 1       | NA     | NA      | NA     | NA      | NA     | NA      | NA     | NA      |
| 0.21   | 1       | NA     | NA      | NA     | NA      | NA     | NA      | NA     | NA      |
| 0.19   | 1       | NA     | NA      | NA     | NA      | NA     | NA      | NA     | NA      |



| time A | leuko A | time A | leuko A | time B | leuko B | time D | leuko D | time E | leuko E |
|--------|---------|--------|---------|--------|---------|--------|---------|--------|---------|
| 0.19   | 1       | NA     | NA      | NA     | NA      | NA     | NA      | NA     | NA      |
| 0.16   | 1       | NA     | NA      | NA     | NA      | NA     | NA      | NA     | NA      |
| 0.18   | 1       | NA     | NA      | NA     | NA      | NA     | NA      | NA     | NA      |
| 0.18   | 1       | NA     | NA      | NA     | NA      | NA     | NA      | NA     | NA      |
| 0.15   | 1       | NA     | NA      | NA     | NA      | NA     | NA      | NA     | NA      |
| 0.15   | 1       | NA     | NA      | NA     | NA      | NA     | NA      | NA     | NA      |
| 0.16   | 1       | NA     | NA      | NA     | NA      | NA     | NA      | NA     | NA      |
| 0.17   | 1       | NA     | NA      | NA     | NA      | NA     | NA      | NA     | NA      |
| 0.17   | 1       | NA     | NA      | NA     | NA      | NA     | NA      | NA     | NA      |
| 0.18   | 1       | NA     | NA      | NA     | NA      | NA     | NA      | NA     | NA      |
| 0.12   | 1       | NA     | NA      | NA     | NA      | NA     | NA      | NA     | NA      |
| 0.32   | 1       | NA     | NA      | NA     | NA      | NA     | NA      | NA     | NA      |
| 18.96  | 1       | NA     | NA      | NA     | NA      | NA     | NA      | NA     | NA      |
| 0.27   | 1       | NA     | NA      | NA     | NA      | NA     | NA      | NA     | NA      |
| 0.21   | 1       | NA     | NA      | NA     | NA      | NA     | NA      | NA     | NA      |
| 0.20   | 1       | NA     | NA      | NA     | NA      | NA     | NA      | NA     | NA      |
| 0.08   | 1       | NA     | NA      | NA     | NA      | NA     | NA      | NA     | NA      |
| 0.10   | 1       | NA     | NA      | NA     | NA      | NA     | NA      | NA     | NA      |
| 0.16   | 1       | NA     | NA      | NA     | NA      | NA     | NA      | NA     | NA      |
| 0.18   | 1       | NA     | NA      | NA     | NA      | NA     | NA      | NA     | NA      |
| 0.17   | 1       | NA     | NA      | NA     | NA      | NA     | NA      | NA     | NA      |
| 0.18   | 1       | NA     | NA      | NA     | NA      | NA     | NA      | NA     | NA      |
| 0.20   | 1       | NA     | NA      | NA     | NA      | NA     | NA      | NA     | NA      |
| 0.16   | 1       | NA     | NA      | NA     | NA      | NA     | NA      | NA     | NA      |
| 0.18   | 1       | NA     | NA      | NA     | NA      | NA     | NA      | NA     | NA      |
| 0.17   | 1       | NA     | NA      | NA     | NA      | NA     | NA      | NA     | NA      |
| 0.15   | 1       | NA     | NA      | NA     | NA      | NA     | NA      | NA     | NA      |
| 0.17   | 1       | NA     | NA      | NA     | NA      | NA     | NA      | NA     | NA      |
| 4.16   | 1       | NA     | NA      | NA     | NA      | NA     | NA      | NA     | NA      |
| 0.24   | 1       | NA     | NA      | NA     | NA      | NA     | NA      | NA     | NA      |
| 0.15   | 1       | NA     | NA      | NA     | NA      | NA     | NA      | NA     | NA      |
| 0.26   | 1       | NA     | NA      | NA     | NA      | NA     | NA      | NA     | NA      |
| 0.23   | 1       | NA     | NA      | NA     | NA      | NA     | NA      | NA     | NA      |
| 0.21   | 1       | NA     | NA      | NA     | NA      | NA     | NA      | NA     | NA      |
| 0.21   | 1       | NA     | NA      | NA     | NA      | NA     | NA      | NA     | NA      |
| 0.18   | 1       | NA     | NA      | NA     | NA      | NA     | NA      | NA     | NA      |
| 0.18   | 1       | NA     | NA      | NA     | NA      | NA     | NA      | NA     | NA      |
| 0.19   | 1       | NA     | NA      | NA     | NA      | NA     | NA      | NA     | NA      |
| 0.33   | 1       | NA     | NA      | NA     | NA      | NA     | NA      | NA     | NA      |
| 0.20   | 1       | NA     | NA      | NA     | NA      | NA     | NA      | NA     | NA      |
| 11.09  | 1       | NA     | NA      | NA     | NA      | NA     | NA      | NA     | NA      |
| 0.24   | 1       | NA     | NA      | NA     | NA      | NA     | NA      | NA     | NA      |
| 0.19   | 1       | NA     | NA      | NA     | NA      | NA     | NA      | NA     | NA      |
| 0.17   | 1       | NA     | NA      | NA     | NA      | NA     | NA      | NA     | NA      |
| 0.13   | 1       | NA     | NA      | NA     | NA      | NA     | NA      | NA     | NA      |
| 0.22   | 1       | NA     | NA      | NA     | NA      | NA     | NA      | NA     | NA      |
| 0.18   | 1       | NA     | NA      | NA     | NA      | NA     | NA      | NA     | NA      |
| 0.33   | 1       | NA     | NA      | NA     | NA      | NA     | NA      | NA     | NA      |
| 0.17   | 1       | NA     | NA      | NA     | NA      | NA     | NA      | NA     | NA      |
| 0.20   | 1       | NA     | NA      | NA     | NA      | NA     | NA      | NA     | NA      |
| 0.38   | 1       | NA     | NA      | NA     | NA      | NA     | NA      | NA     | NA      |
| 0.26   | 1       | NA     | NA      | NA     | NA      | NA     | NA      | NA     | NA      |

| time A | leuko A | time A | leuko A | time B | leuko B | time D | leuko D | time E | leuko E |
|--------|---------|--------|---------|--------|---------|--------|---------|--------|---------|
| 0.91   | 1       | NA     | NA      | NA     | NA      | NA     | NA      | NA     | NA      |
| 0.24   | 1       | NA     | NA      | NA     | NA      | NA     | NA      | NA     | NA      |
| 0.29   | 1       | NA     | NA      | NA     | NA      | NA     | NA      | NA     | NA      |
| 0.22   | 1       | NA     | NA      | NA     | NA      | NA     | NA      | NA     | NA      |
| 0.17   | 1       | NA     | NA      | NA     | NA      | NA     | NA      | NA     | NA      |
| 0.24   | 1       | NA     | NA      | NA     | NA      | NA     | NA      | NA     | NA      |
| 0.28   | 1       | NA     | NA      | NA     | NA      | NA     | NA      | NA     | NA      |
| 0.25   | 1       | NA     | NA      | NA     | NA      | NA     | NA      | NA     | NA      |
| 0.23   | 1       | NA     | NA      | NA     | NA      | NA     | NA      | NA     | NA      |
| 0.38   | 1       | NA     | NA      | NA     | NA      | NA     | NA      | NA     | NA      |
| 0.22   | 1       | NA     | NA      | NA     | NA      | NA     | NA      | NA     | NA      |
| 0.18   | 1       | NA     | NA      | NA     | NA      | NA     | NA      | NA     | NA      |

## 1.9 SL057

Table 9: Raw data of TBS SL057.

| time<br>A | leuko<br>A | time<br>A | leuko<br>A | time<br>B | leuko<br>B | time<br>C | leuko<br>C | time<br>D | leuko<br>D | time<br>E | leuko<br>E |
|-----------|------------|-----------|------------|-----------|------------|-----------|------------|-----------|------------|-----------|------------|
| 0.00      | 1          | 0.00      | 1          | 0.00      | 1          | 0.00      | 1          | 0.00      | 1          | 0.00      | 1          |
| 0.30      | 1          | 0.26      | 1          | 0.38      | 1          | 0.25      | 1          | 0.20      | 1          | 0.24      | 1          |
| 0.27      | 1          | 0.23      | 1          | 0.28      | 1          | 0.23      | 1          | 0.24      | 1          | 0.31      | 1          |
| 0.25      | 1          | 0.21      | 1          | 0.27      | 1          | 1.21      | 1          | 0.19      | 1          | 0.28      | 1          |
| 0.23      | 1          | 0.24      | 1          | 0.56      | 1          | 0.21      | 1          | 0.22      | 1          | 0.32      | 1          |
| 0.22      | 1          | 0.21      | 1          | 0.30      | 1          | 0.39      | 1          | 0.18      | 1          | 0.28      | 1          |
| 0.20      | 1          | 0.21      | 1          | 0.28      | 1          | 0.22      | 1          | 0.25      | 1          | 0.27      | 1          |
| 0.21      | 1          | 3.96      | 0          | 0.28      | 1          | 0.09      | 1          | 0.21      | 1          | 0.29      | 1          |
| 0.22      | 1          | 4.43      | 1          | 0.79      | 1          | 0.13      | 1          | 0.19      | 1          | 0.29      | 1          |
| 2.50      | 0          | 0.25      | 1          | 0.29      | 1          | 0.21      | 1          | 0.21      | 1          | 0.28      | 1          |
| 0.28      | 0          | 0.24      | 1          | 0.26      | 1          | 0.10      | 1          | 0.21      | 1          | 0.27      | 1          |
| 0.21      | 0          | 0.73      | 0          | 0.24      | 1          | 0.12      | 1          | 0.23      | 1          | 41.33     | 0          |
| 0.20      | 0          | 0.22      | 0          | 0.36      | 1          | 0.20      | 1          | 0.21      | 1          | 0.24      | 0          |
| 0.21      | 0          | 0.14      | 0          | 0.27      | 1          | 0.22      | 1          | 0.24      | 1          | 0.27      | 0          |
| 0.21      | 0          | 0.28      | 0          | 4.93      | 1          | 0.35      | 1          | 0.41      | 1          | 0.50      | 0          |
| 0.19      | 0          | 0.24      | 0          | 0.28      | 1          | 0.31      | 1          | 0.21      | 1          | 0.67      | 0          |
| 0.21      | 0          | 0.20      | 0          | 0.23      | 1          | 0.20      | 1          | 0.26      | 1          | 0.25      | 0          |
| 0.20      | 0          | 0.22      | 0          | 0.25      | 1          | 0.22      | 1          | 0.45      | 1          | 0.21      | 0          |
| 0.16      | 0          | 0.18      | 0          | 0.33      | 1          | 0.08      | 1          | 0.20      | 1          | 0.67      | 0          |
| 0.22      | 0          | 0.54      | 0          | 0.26      | 1          | 0.12      | 1          | 0.19      | 1          | 0.26      | 0          |
| 0.23      | 0          | 0.28      | 0          | 0.21      | 1          | 0.31      | 1          | 0.26      | 1          | 0.25      | 0          |
| 0.22      | 0          | 0.23      | 0          | 0.24      | 1          | 1.11      | 0          | 0.23      | 1          | 0.24      | 0          |
| 0.20      | 0          | 3.04      | 1          | 0.31      | 1          | 0.31      | 0          | 0.26      | 1          | 0.21      | 0          |
| 0.19      | 0          | 0.22      | 1          | 0.25      | 1          | 0.29      | 0          | 0.22      | 1          | 0.19      | 0          |
| 0.19      | 0          | 0.21      | 1          | 0.25      | 1          | 0.34      | 0          | 1.77      | 0          | 1.55      | 0          |
| 0.17      | 0          | 0.19      | 1          | 0.24      | 1          | 0.22      | 0          | 0.24      | 0          | 0.28      | 0          |
| 0.20      | 0          | 0.20      | 1          | 0.26      | 1          | 0.26      | 0          | 0.82      | 0          | 0.37      | 0          |
| 0.18      | 0          | 0.20      | 1          | 0.21      | 1          | 0.34      | 0          | 0.21      | 0          | 0.27      | 0          |
| 0.18      | 0          | 0.17      | 1          | 0.26      | 1          | 0.27      | 0          | 0.28      | 0          | 0.60      | 0          |
| 0.18      | 0          | 0.54      | 0          | 0.23      | 1          | 0.29      | 0          | 0.73      | 0          | 0.23      | 0          |
| 0.20      | 0          | 0.24      | 0          | 0.21      | 1          | 0.20      | 0          | 0.77      | 0          | 0.60      | 0          |
| 0.21      | 0          | 0.17      | 0          | 8.13      | 0          | 0.22      | 0          | 0.46      | 0          | 0.26      | 0          |
| 0.20      | 0          | 0.20      | 0          | 0.35      | 0          | 0.37      | 0          | 0.29      | 0          | 0.27      | 0          |
| 0.20      | 0          | 0.16      | 0          | 0.28      | 0          | 0.24      | 0          | 0.32      | 0          | 0.30      | 0          |
| 0.19      | 0          | 0.20      | 0          | 0.65      | 0          | 1.56      | 0          | 0.94      | 0          | 0.25      | 0          |
| 0.18      | 0          | 0.18      | 0          | 0.31      | 0          | 0.24      | 0          | 0.24      | 0          | 0.21      | 0          |
| 0.18      | 0          | 0.18      | 0          | 0.37      | 0          | 0.28      | 0          | 0.26      | 0          | 0.24      | 0          |
| 0.19      | 0          | 0.17      | 0          | 0.66      | 0          | 0.21      | 0          | 0.27      | 0          | 0.23      | 0          |
| 0.19      | 0          | 0.19      | 0          | 0.33      | 0          | 0.25      | 0          | 0.44      | 0          | 0.23      | 0          |
| 0.20      | 0          | 0.19      | 0          | 0.28      | 0          | 0.24      | 0          | 0.19      | 0          | 0.39      | 0          |
| 0.19      | 0          | 0.18      | 0          | 0.26      | 0          | 0.27      | 0          | 0.23      | 0          | 0.24      | 0          |
| 0.16      | 0          | 0.40      | 0          | 0.75      | 0          | 0.30      | 0          | 0.30      | 0          | 0.71      | 0          |
| 0.19      | 0          | 0.25      | 0          | 0.35      | 0          | 0.34      | 0          | 0.24      | 0          | 0.27      | 0          |
| 0.19      | 0          | 2.02      | 1          | 0.29      | 0          | 0.23      | 0          | 0.48      | 0          | 0.24      | 0          |
| 0.17      | 0          | 0.23      | 1          | 0.26      | 0          | 0.23      | 0          | 0.22      | 0          | 0.67      | 0          |
| 0.20      | 0          | 0.21      | 1          | 0.27      | 0          | 0.24      | 0          | 0.30      | 0          | 0.24      | 0          |
| 0.17      | 0          | 0.19      | 1          | 0.33      | 0          | 0.23      | 0          | 0.22      | 0          | 0.21      | 0          |
| 0.19      | 0          | 0.20      | 1          | 0.27      | 0          | 0.22      | 0          | 0.23      | 0          | 0.22      | 0          |

| time<br>A | leuko<br>A | time<br>A | leuko<br>A | time<br>B | leuko<br>B | time<br>C | leuko<br>C | time<br>D | leuko<br>D | time<br>E | leuko<br>E |
|-----------|------------|-----------|------------|-----------|------------|-----------|------------|-----------|------------|-----------|------------|
| 0.17      | 0          | 0.37      | 1          | 0.27      | 0          | 0.24      | 0          | 0.35      | 0          | 0.20      | 0          |
| 0.19      | 0          | 0.19      | 1          | 0.48      | 0          | 0.25      | 0          | 0.29      | 0          | 0.41      | 0          |
| 0.20      | 0          | 0.20      | 1          | 0.33      | 0          | 0.27      | 0          | 0.66      | 0          | 0.21      | 0          |
| 0.18      | 0          | 0.17      | 1          | 0.32      | 0          | 0.35      | 0          | 0.39      | 0          | 0.46      | 0          |
| 0.20      | 0          | 0.18      | 1          | 1.39      | 0          | 0.34      | 0          | 0.18      | 0          | 0.90      | 0          |
| 0.18      | 0          | 0.17      | 1          | 0.33      | 0          | 0.23      | 0          | 0.26      | 0          | 0.71      | 0          |
| 0.19      | 0          | 0.17      | 1          | 0.29      | 0          | 0.33      | 0          | 0.21      | 0          | 0.23      | 0          |
| 0.22      | 0          | 0.19      | 1          | 0.29      | 0          | 0.21      | 0          | 0.29      | 0          | 2.31      | 0          |
| 0.21      | 0          | 0.19      | 1          | 0.29      | 0          | 0.23      | 0          | 0.22      | 0          | 0.26      | 0          |
| 0.20      | 0          | 0.16      | 1          | 0.28      | 0          | 0.32      | 0          | 0.31      | 0          | 0.20      | 0          |
| 0.22      | 0          | 0.37      | 0          | 0.26      | 0          | 0.25      | 0          | 0.27      | 0          | 0.61      | 0          |
| 0.19      | 0          | 0.25      | 0          | 0.27      | 0          | 0.23      | 0          | 0.21      | 0          | 0.23      | 0          |
| 0.21      | 0          | 0.28      | 0          | 0.32      | 0          | 0.21      | 0          | 0.22      | 0          | 0.24      | 0          |
| 0.18      | 0          | 0.21      | 0          | 0.27      | 0          | 0.23      | 0          | 0.44      | 0          | 0.25      | 0          |
| 0.19      | 0          | 0.16      | 0          | 0.28      | 0          | 0.33      | 0          | 0.44      | 0          | 0.23      | 0          |
| 0.17      | 0          | 0.19      | 0          | 0.26      | 0          | 0.26      | 0          | 0.44      | 0          | 0.23      | 0          |
| 0.19      | 0          | 0.17      | 0          | 0.25      | 0          | 0.24      | 0          | 0.22      | 0          | 0.22      | 0          |
| 0.16      | 0          | 0.22      | 0          | 0.26      | 0          | 0.46      | 0          | 0.18      | 0          | 0.21      | 0          |
| 0.18      | 0          | 0.19      | 0          | 0.25      | 0          | 0.56      | 0          | 0.27      | 0          | 1.87      | 0          |
| 0.22      | 0          | 0.17      | 0          | 0.28      | 0          | 0.22      | 0          | 0.21      | 0          | 0.24      | 0          |
| 0.18      | 0          | 0.17      | 0          | 0.26      | 0          | 0.23      | 0          | 0.23      | 0          | 0.26      | 0          |
| 0.20      | 0          | 0.19      | 0          | 0.22      | 0          | 0.25      | 0          | 0.20      | 0          | 0.23      | 0          |
| 0.22      | 0          | 0.17      | 0          | 0.35      | 0          | 0.23      | 0          | 0.20      | 0          | 0.25      | 0          |
| 0.21      | 0          | 0.20      | 0          | 0.28      | 0          | 0.25      | 0          | 0.21      | 0          | 0.23      | 0          |
| 0.20      | 0          | 0.17      | 0          | 0.26      | 0          | 0.23      | 0          | 0.19      | 0          | 0.21      | 0          |
| 0.21      | 0          | 0.21      | 0          | 0.26      | 0          | 0.22      | 0          | 0.19      | 0          | 0.47      | 0          |
| 0.19      | 0          | 0.18      | 0          | 0.60      | 0          | 0.39      | 0          | 0.21      | 0          | 0.79      | 0          |
| 0.20      | 0          | 0.14      | 0          | 0.28      | 0          | 1.05      | 0          | 0.49      | 0          | 0.26      | 0          |
| 0.21      | 0          | 0.26      | 0          | 0.28      | 0          | 0.20      | 0          | 0.20      | 0          | 1.16      | 0          |
| 0.18      | 0          | 0.19      | 0          | 0.26      | 0          | 0.61      | 0          | 0.22      | 0          | 0.25      | 0          |
| 0.17      | 0          | 0.21      | 0          | 0.27      | 0          | 0.27      | 0          | 0.22      | 0          | 0.21      | 0          |
| 0.19      | 0          | 0.18      | 0          | 0.58      | 0          | 0.26      | 0          | 0.22      | 0          | 0.24      | 0          |
| 0.20      | 0          | 0.19      | 0          | 0.28      | 0          | 0.26      | 0          | 0.20      | 0          | 0.59      | 0          |
| 0.16      | 0          | 0.19      | 0          | 0.27      | 0          | 0.37      | 0          | 0.21      | 0          | 0.26      | 0          |
| 0.18      | 0          | 0.19      | 0          | 0.25      | 0          | 0.25      | 0          | 0.25      | 0          | 0.50      | 0          |
| 0.19      | 0          | 0.19      | 0          | 0.32      | 0          | 0.28      | 0          | 0.23      | 0          | 0.48      | 0          |
| 0.19      | 0          | 0.18      | 0          | 0.25      | 0          | 0.29      | 0          | 0.19      | 0          | 0.27      | 0          |
| 0.20      | 0          | 0.20      | 0          | 0.26      | 0          | 0.39      | 0          | 0.21      | 0          | 0.20      | 0          |
| 0.19      | 0          | 0.19      | 0          | 0.25      | 0          | 0.23      | 0          | 0.23      | 0          | 2.56      | 0          |
| 0.22      | 0          | 0.18      | 0          | 0.31      | 0          | 0.26      | 0          | 0.19      | 0          | 0.25      | 0          |
| 0.21      | 0          | 0.15      | 0          | 0.27      | 0          | 0.22      | 0          | 0.22      | 0          | 0.20      | 0          |
| 0.20      | 0          | 0.16      | 0          | 0.28      | 0          | 0.28      | 0          | 0.19      | 0          | 0.24      | 0          |
| 0.19      | 0          | 0.17      | 0          | 0.26      | 0          | 0.25      | 0          | 0.21      | 0          | 0.18      | 0          |
| 5.75      | 1          | 0.20      | 0          | 0.25      | 0          | 0.35      | 0          | 0.20      | 0          | 0.21      | 0          |
| 0.31      | 1          | 0.20      | 0          | 0.31      | 0          | 0.36      | 0          | 0.22      | 0          | 0.22      | 0          |
| 0.23      | 1          | 0.16      | 0          | 0.24      | 0          | 0.39      | 0          | 0.15      | 0          | 0.33      | 0          |
| 0.20      | 1          | 0.17      | 0          | 0.30      | 0          | 0.20      | 0          | 0.23      | 0          | 0.24      | 0          |
| 0.20      | 1          | 0.20      | 0          | 0.25      | 0          | 0.22      | 0          | 0.20      | 0          | 0.24      | 0          |
| 0.21      | 1          | 0.18      | 0          | 0.27      | 0          | 0.26      | 0          | 0.21      | 0          | 0.44      | 0          |
| 0.21      | 1          | 0.15      | 0          | 0.24      | 0          | 0.24      | 0          | 0.34      | 0          | 1.03      | 0          |
| 0.21      | 1          | 0.19      | 0          | 0.31      | 0          | 0.43      | 0          | 0.22      | 0          | 0.26      | 0          |

| time<br>A | leuko<br>A | time<br>A | leuko<br>A | time<br>B | leuko<br>B | time<br>C | leuko<br>C | time<br>D | leuko<br>D | time<br>E | leuko<br>E |
|-----------|------------|-----------|------------|-----------|------------|-----------|------------|-----------|------------|-----------|------------|
| 0.19      | 1          | 0.16      | 0          | 0.29      | 0          | 0.32      | 0          | 0.20      | 0          | 0.58      | 0          |
| 0.19      | 1          | 0.18      | 0          | 0.31      | 0          | 0.23      | 0          | 0.22      | 0          | 0.26      | 0          |
| 0.19      | 1          | 0.18      | 0          | 0.28      | 0          | 0.22      | 0          | 0.21      | 0          | 0.23      | 0          |
| 0.18      | 1          | 0.17      | 0          | 0.28      | 0          | 0.35      | 0          | 0.24      | 0          | 0.29      | 0          |
| 0.19      | 1          | 0.19      | 0          | 0.26      | 0          | 0.68      | 0          | 0.21      | 0          | 0.26      | 0          |
| 0.21      | 1          | 0.15      | 0          | 0.26      | 0          | 1.11      | 0          | 0.20      | 0          | 0.61      | 0          |
| 0.69      | 0          | 0.20      | 0          | 0.31      | 0          | 0.28      | 0          | 0.20      | 0          | 0.20      | 0          |
| 0.24      | 0          | 0.18      | 0          | 0.26      | 0          | 0.29      | 0          | 0.19      | 0          | 0.23      | 0          |
| 0.22      | 0          | 0.18      | 0          | 0.25      | 0          | 0.28      | 0          | 0.21      | 0          | 0.22      | 0          |
| 0.20      | 0          | 0.19      | 0          | 0.25      | 0          | 0.26      | 0          | 0.35      | 0          | 0.26      | 0          |
| 0.28      | 0          | 0.18      | 0          | 0.26      | 0          | 0.24      | 0          | 0.23      | 0          | 2.07      | 0          |
| 0.28      | 0          | 0.20      | 0          | 0.34      | 0          | 0.27      | 0          | 0.19      | 0          | 0.22      | 0          |
| 0.24      | 0          | 0.18      | 0          | 0.24      | 0          | 0.27      | 0          | 0.21      | 0          | 2.60      | 0          |
| 0.18      | 0          | 0.19      | 0          | 0.25      | 0          | 0.41      | 0          | 0.23      | 0          | 0.29      | 0          |
| 0.23      | 0          | 0.18      | 0          | 0.25      | 0          | 0.29      | 0          | 0.21      | 0          | 0.22      | 0          |
| 0.18      | 0          | 0.18      | 0          | 0.28      | 0          | 0.51      | 0          | 0.19      | 0          | 0.21      | 0          |
| 0.21      | 0          | 0.20      | 0          | 0.28      | 0          | 0.33      | 0          | 0.20      | 0          | 0.21      | 0          |
| 0.16      | 0          | 0.18      | 0          | 0.27      | 0          | 0.27      | 0          | 0.23      | 0          | 0.50      | 0          |
| 0.21      | 0          | 0.14      | 0          | 0.26      | 0          | 0.29      | 0          | 0.21      | 0          | 0.26      | 0          |
| 0.20      | 0          | 0.26      | 0          | 0.25      | 0          | 0.28      | 0          | 0.22      | 0          | 0.83      | 0          |
| 0.19      | 0          | 0.24      | 0          | 0.27      | 0          | 0.41      | 0          | 0.21      | 0          | 0.28      | 0          |
| 0.20      | 0          | 0.18      | 0          | 0.27      | 0          | 0.31      | 0          | 0.19      | 0          | 0.16      | 0          |
| 0.20      | 0          | 0.19      | 0          | 0.26      | 0          | 0.27      | 0          | 0.21      | 0          | 0.26      | 0          |
| 0.19      | 0          | 0.18      | 0          | 0.27      | 0          | 0.25      | 0          | 0.18      | 0          | 0.33      | 0          |
| 0.18      | 0          | 0.19      | 0          | 0.24      | 0          | 0.25      | 0          | 0.21      | 0          | 0.22      | 0          |
| 0.19      | 0          | 0.18      | 0          | 0.31      | 0          | 0.26      | 0          | 0.23      | 0          | 0.34      | 0          |
| 0.19      | 0          | 0.16      | 0          | 0.26      | 0          | 0.27      | 0          | 0.22      | 0          | 2.68      | 0          |
| 0.20      | 0          | 0.20      | 0          | 0.25      | 0          | 0.22      | 0          | 0.19      | 0          | 0.29      | 0          |
| 0.20      | 0          | 0.18      | 0          | 0.25      | 0          | 0.36      | 0          | 0.20      | 0          | 0.73      | 0          |
| 0.17      | 0          | 0.20      | 0          | 0.29      | 0          | 0.39      | 0          | 0.17      | 0          | 0.23      | 0          |
| 0.21      | 0          | 0.18      | 0          | 0.25      | 0          | 0.27      | 0          | 0.22      | 0          | 0.21      | 0          |
| 0.19      | 0          | 0.19      | 0          | 0.25      | 0          | 0.31      | 0          | 0.19      | 0          | 0.87      | 0          |
| 0.18      | 0          | 0.21      | 0          | 0.26      | 0          | 0.28      | 0          | 0.21      | 0          | 0.23      | 0          |
| 0.19      | 0          | 0.19      | 0          | 2.27      | 0          | 0.30      | 0          | 0.19      | 0          | 0.20      | 0          |
| 0.20      | 0          | 0.22      | 0          | 0.28      | 0          | 0.31      | 0          | 0.21      | 0          | 0.39      | 0          |
| 0.22      | 0          | 0.20      | 0          | 0.27      | 0          | 0.48      | 0          | 0.20      | 0          | 0.24      | 0          |
| 0.22      | 0          | 0.20      | 0          | 0.93      | 0          | 0.24      | 0          | 0.20      | 0          | 0.19      | 0          |
| 0.20      | 0          | 0.20      | 0          | 0.28      | 0          | 0.23      | 0          | 0.19      | 0          | 0.21      | 0          |
| 0.19      | 0          | 0.17      | 0          | 0.28      | 0          | 0.30      | 0          | 0.21      | 0          | 0.26      | 0          |
| 0.21      | 0          | 0.20      | 0          | 0.26      | 0          | 0.29      | 0          | 0.21      | 0          | 107.22    | 1          |
| 0.19      | 0          | 0.20      | 0          | 0.32      | 0          | 0.27      | 0          | 0.22      | 0          | 0.01      | 1          |
| 11.83     | 1          | 0.23      | 0          | 0.26      | 0          | 0.25      | 0          | 0.18      | 0          | 0.26      | 1          |
| 0.27      | 1          | 0.18      | 0          | 0.28      | 0          | 0.24      | 0          | 0.20      | 0          | 0.27      | 1          |
| 0.18      | 1          | 0.24      | 0          | 0.26      | 0          | 0.25      | 0          | 0.21      | 0          | 0.27      | 1          |
| 0.15      | 1          | 0.31      | 0          | 0.35      | 0          | 0.27      | 0          | 0.19      | 0          | 0.26      | 1          |
| 0.17      | 1          | 0.24      | 0          | 0.24      | 0          | 0.23      | 0          | 0.20      | 0          | 0.28      | 1          |
| 0.16      | 1          | 0.22      | 0          | 0.28      | 0          | 0.26      | 0          | 0.19      | 0          | 0.27      | 1          |
| 0.18      | 1          | 0.25      | 0          | 0.26      | 0          | 0.27      | 0          | 0.21      | 0          | 4.32      | 0          |
| 0.17      | 1          | 5.18      | 1          | 0.31      | 0          | 0.23      | 0          | 0.19      | 0          | 0.52      | 0          |
| 0.17      | 1          | 0.25      | 1          | 0.28      | 0          | 0.27      | 0          | 0.22      | 0          | 0.52      | 0          |
| 0.17      | 1          | 0.19      | 1          | 0.25      | 0          | 0.27      | 0          | 0.21      | 0          | 0.22      | 0          |

| time<br>A | leuko<br>A | time<br>A | leuko<br>A | time<br>B | leuko<br>B | time<br>C | leuko<br>C | time<br>D | leuko<br>D | time<br>E | leuko<br>E |
|-----------|------------|-----------|------------|-----------|------------|-----------|------------|-----------|------------|-----------|------------|
| 0.19      | 1          | 0.18      | 1          | 0.24      | 0          | 0.21      | 0          | 0.20      | 0          | 0.60      | 0          |
| 0.16      | 1          | 0.20      | 1          | 0.29      | 0          | 0.22      | 0          | 0.20      | 0          | 0.26      | 0          |
| 0.19      | 1          | 0.19      | 1          | 0.26      | 0          | 0.23      | 0          | 0.20      | 0          | 0.22      | 0          |
| 0.17      | 1          | 0.19      | 1          | 0.27      | 0          | 0.46      | 0          | 0.16      | 0          | 0.24      | 0          |
| 0.51      | 0          | 0.20      | 1          | 0.26      | 0          | 0.46      | 0          | 0.20      | 0          | 0.22      | 0          |
| 0.43      | 0          | 0.18      | 1          | 0.30      | 0          | 0.51      | 0          | 0.20      | 0          | 0.20      | 0          |
| 0.52      | 0          | 0.20      | 1          | 0.26      | 0          | 0.37      | 0          | 0.20      | 0          | 0.22      | 0          |
| 0.22      | 0          | 0.20      | 1          | 0.27      | 0          | 0.25      | 0          | 0.19      | 0          | 0.20      | 0          |
| 0.52      | 0          | 0.18      | 1          | 0.26      | 0          | 0.97      | 0          | 0.19      | 0          | 0.22      | 0          |
| 0.23      | 0          | 0.17      | 1          | 0.29      | 0          | 0.28      | 0          | 0.21      | 0          | 0.22      | 0          |
| 0.40      | 0          | 0.16      | 1          | 0.28      | 0          | 0.29      | 0          | 0.16      | 0          | 0.20      | 0          |
| 0.21      | 0          | 0.21      | 1          | 0.23      | 0          | 1.21      | 0          | 0.20      | 0          | 0.20      | 0          |
| 0.22      | 0          | 0.20      | 1          | 0.28      | 0          | 6.12      | 1          | 0.18      | 0          | 0.66      | 0          |
| 0.19      | 0          | 2.43      | 0          | 0.25      | 0          | 0.09      | 1          | 0.18      | 0          | 0.23      | 0          |
| 0.22      | 0          | 0.27      | 0          | 0.26      | 0          | 0.13      | 1          | 0.20      | 0          | 0.23      | 0          |
| 0.22      | 0          | 0.20      | 0          | 0.28      | 0          | 0.22      | 1          | 0.21      | 0          | 1.34      | 0          |
| 0.23      | 0          | 0.22      | 0          | 0.28      | 0          | 0.31      | 1          | 0.19      | 0          | 0.25      | 0          |
| 6.47      | 1          | 0.24      | 0          | 0.27      | 0          | 0.23      | 1          | 0.19      | 0          | 0.19      | 0          |
| 0.31      | 1          | 0.22      | 0          | 0.25      | 0          | 0.43      | 1          | 0.51      | 0          | 0.23      | 0          |
| 0.23      | 1          | 0.18      | 0          | 0.27      | 0          | 0.32      | 1          | 0.20      | 0          | 0.24      | 0          |
| 0.22      | 1          | 0.20      | 0          | 0.26      | 0          | 0.45      | 1          | 0.23      | 0          | 0.27      | 0          |
| 0.20      | 1          | 0.23      | 0          | 0.27      | 0          | 0.24      | 1          | 0.49      | 0          | 0.20      | 0          |
| 0.20      | 1          | 0.23      | 0          | 0.28      | 0          | 0.21      | 1          | 0.21      | 0          | 0.20      | 0          |
| 0.21      | 1          | 0.23      | 0          | 0.27      | 0          | 0.22      | 1          | 0.32      | 0          | 0.58      | 0          |
| 0.20      | 1          | 0.25      | 0          | 0.26      | 0          | 0.23      | 1          | 0.54      | 0          | 0.24      | 0          |
| 0.20      | 1          | 0.19      | 0          | 0.26      | 0          | 0.24      | 1          | 0.27      | 0          | 1.13      | 0          |
| 0.21      | 1          | 0.21      | 0          | 0.26      | 0          | 0.27      | 1          | 0.34      | 0          | 0.27      | 0          |
| 0.72      | 0          | 0.30      | 0          | 0.29      | 0          | 0.19      | 1          | 0.25      | 0          | 0.23      | 0          |
| 0.21      | 0          | 0.24      | 0          | 0.26      | 0          | 0.22      | 1          | 0.27      | 0          | 0.20      | 0          |
| 0.19      | 0          | 0.20      | 0          | 0.27      | 0          | 0.21      | 1          | 0.24      | 0          | 1.08      | 0          |
| 0.22      | 0          | 0.20      | 0          | 0.25      | 0          | 0.23      | 1          | 0.25      | 0          | 0.25      | 0          |
| 0.22      | 0          | 0.19      | 0          | 0.30      | 0          | 0.20      | 1          | 0.24      | 0          | 0.21      | 0          |
| 0.18      | 0          | 0.21      | 0          | 0.27      | 0          | 0.22      | 1          | 0.23      | 0          | 0.22      | 0          |
| 0.18      | 0          | 0.18      | 0          | 0.26      | 0          | 0.21      | 1          | 0.24      | 0          | 0.94      | 0          |
| 0.18      | 0          | 0.20      | 0          | 0.25      | 0          | 0.22      | 1          | 0.22      | 0          | 0.25      | 0          |
| 0.18      | 0          | 0.21      | 0          | 0.29      | 0          | 0.40      | 1          | 0.21      | 0          | 0.38      | 0          |
| 0.21      | 0          | 0.17      | 0          | 0.27      | 0          | 0.22      | 1          | 0.20      | 0          | 0.24      | 0          |
| 0.23      | 0          | 0.21      | 0          | 0.26      | 0          | 0.22      | 1          | 0.22      | 0          | 0.20      | 0          |
| 0.22      | 0          | 0.20      | 0          | 0.30      | 0          | 0.24      | 1          | 0.22      | 0          | 0.19      | 0          |
| 0.19      | 0          | 0.21      | 0          | 0.25      | 0          | 0.23      | 1          | 0.21      | 0          | 0.58      | 0          |
| 0.20      | 0          | 0.21      | 0          | 0.25      | 0          | 3.34      | 0          | 0.22      | 0          | 0.29      | 0          |
| 0.21      | 0          | 0.20      | 0          | 0.33      | 0          | 0.31      | 0          | 0.22      | 0          | 0.46      | 0          |
| 0.20      | 0          | 0.19      | 0          | 0.26      | 0          | 0.29      | 0          | 0.20      | 0          | 0.24      | 0          |
| 0.20      | 0          | 0.20      | 0          | 0.27      | 0          | 0.57      | 0          | 0.19      | 0          | 0.26      | 0          |
| 0.22      | 0          | 0.32      | 0          | 0.25      | 0          | 0.30      | 0          | 0.23      | 0          | 0.81      | 0          |
| 0.20      | 0          | 0.52      | 0          | 0.28      | 0          | 0.36      | 0          | 0.22      | 0          | 0.23      | 0          |
| 0.20      | 0          | 0.29      | 0          | 0.27      | 0          | 0.26      | 0          | 0.20      | 0          | 0.31      | 0          |
| 0.31      | 0          | 0.29      | 0          | 0.26      | 0          | 0.25      | 0          | 0.19      | 0          | 0.23      | 0          |
| 0.20      | 0          | 0.20      | 0          | 0.24      | 0          | 0.23      | 0          | 0.22      | 0          | 0.29      | 0          |
| 0.21      | 0          | 0.19      | 0          | 0.30      | 0          | 0.43      | 0          | 0.20      | 0          | 0.43      | 0          |
| 0.20      | 0          | 0.20      | 0          | 0.23      | 0          | 0.24      | 0          | 0.20      | 0          | 0.26      | 0          |

| time<br>A | leuko<br>A | time<br>A | leuko<br>A | time<br>B | leuko<br>B | time<br>C | leuko<br>C | time<br>D | leuko<br>D | time<br>E | leuko<br>E |
|-----------|------------|-----------|------------|-----------|------------|-----------|------------|-----------|------------|-----------|------------|
| 0.21      | 0          | 0.19      | 0          | 0.25      | 0          | 0.24      | 0          | 0.19      | 0          | 0.32      | 0          |
| 0.19      | 0          | 0.19      | 0          | 0.32      | 0          | 0.21      | 0          | 0.21      | 0          | 0.32      | 0          |
| 0.20      | 0          | 0.20      | 0          | 0.26      | 0          | 0.28      | 0          | 0.21      | 0          | 0.24      | 0          |
| 0.21      | 0          | 0.20      | 0          | 0.24      | 0          | 0.25      | 0          | 0.18      | 0          | 0.48      | 0          |
| 0.20      | 0          | 0.20      | 0          | 0.32      | 0          | 0.24      | 0          | 0.21      | 0          | 0.65      | 0          |
| 0.19      | 0          | 0.23      | 0          | 0.22      | 0          | 0.27      | 0          | 0.19      | 0          | 0.25      | 0          |
| 0.20      | 0          | 0.23      | 0          | 0.27      | 0          | 0.22      | 0          | 0.22      | 0          | 0.25      | 0          |
| 0.20      | 0          | 0.19      | 0          | 0.42      | 0          | 0.27      | 0          | 0.17      | 0          | 0.31      | 0          |
| 0.20      | 0          | 0.23      | 0          | 0.31      | 0          | 0.59      | 0          | 0.20      | 0          | 0.22      | 0          |
| 0.22      | 0          | 0.20      | 0          | 0.25      | 0          | 0.26      | 0          | 0.21      | 0          | 0.20      | 0          |
| 0.22      | 0          | 0.21      | 0          | 2.22      | 0          | 0.23      | 0          | 0.23      | 0          | 0.22      | 0          |
| 0.19      | 0          | 0.17      | 0          | 0.26      | 0          | 0.24      | 0          | 0.19      | 0          | 0.37      | 0          |
| 0.31      | 0          | 0.23      | 0          | 0.22      | 0          | 0.28      | 0          | 0.20      | 0          | 0.22      | 0          |
| 0.22      | 0          | 0.21      | 0          | 1.18      | 0          | 0.22      | 0          | 0.18      | 0          | 0.24      | 0          |
| 0.23      | 0          | 0.17      | 0          | 0.21      | 0          | 0.25      | 0          | 0.20      | 0          | 0.26      | 0          |
| 0.20      | 0          | 0.10      | 0          | 0.27      | 0          | 0.22      | 0          | 0.21      | 0          | 1.01      | 0          |
| 0.19      | 0          | 0.22      | 0          | 0.36      | 0          | 0.50      | 0          | 0.20      | 0          | 0.30      | 0          |
| 4.58      | 1          | 0.21      | 0          | 0.28      | 0          | 0.27      | 0          | 0.20      | 0          | 0.45      | 0          |
| 0.26      | 1          | 0.20      | 0          | 0.25      | 0          | 0.23      | 0          | 0.18      | 0          | 0.29      | 0          |
| 0.21      | 1          | 0.22      | 0          | 0.48      | 0          | 0.32      | 0          | 0.18      | 0          | 0.35      | 0          |
| 0.21      | 1          | 0.21      | 0          | 0.27      | 0          | 0.31      | 0          | 0.20      | 0          | 0.37      | 0          |
| 0.20      | 1          | 0.23      | 0          | 0.24      | 0          | 0.24      | 0          | 0.20      | 0          | 0.35      | 0          |
| 0.19      | 1          | 0.20      | 0          | 0.39      | 0          | 0.26      | 0          | 0.16      | 0          | 1.33      | 0          |
| 0.20      | 1          | 0.21      | 0          | 0.25      | 0          | 0.23      | 0          | 0.17      | 0          | 0.22      | 0          |
| 0.18      | 1          | 0.18      | 0          | 0.26      | 0          | 0.25      | 0          | 0.25      | 0          | 0.88      | 0          |
| 0.19      | 1          | 0.23      | 0          | 0.23      | 0          | 0.33      | 0          | 0.24      | 0          | 0.21      | 0          |
| 0.18      | 1          | 0.25      | 0          | 7.07      | 0          | 0.62      | 0          | 0.21      | 0          | 0.58      | 0          |
| 0.16      | 1          | 0.22      | 0          | 0.25      | 0          | 0.23      | 0          | 0.20      | 0          | 0.25      | 0          |
| 0.18      | 1          | 0.20      | 0          | 0.25      | 0          | 0.23      | 0          | 0.19      | 0          | 0.20      | 0          |
| 0.19      | 1          | 0.20      | 0          | 3.19      | 0          | 0.38      | 0          | 0.17      | 0          | 0.24      | 0          |
| 0.18      | 1          | 0.22      | 0          | 0.26      | 0          | 0.24      | 0          | 0.19      | 0          | 0.39      | 0          |
| 0.21      | 1          | 0.19      | 0          | 0.25      | 0          | 0.23      | 0          | 0.21      | 0          | 0.64      | 0          |
| 0.18      | 1          | 0.20      | 0          | 0.32      | 0          | 0.41      | 0          | 0.18      | 0          | 0.23      | 0          |
| 0.18      | 1          | 0.20      | 0          | 0.24      | 0          | 0.27      | 0          | 0.15      | 0          | 0.25      | 0          |
| 0.20      | 1          | 0.20      | 0          | 0.26      | 0          | 0.28      | 0          | 0.18      | 0          | 0.21      | 0          |
| 3.44      | 0          | 0.19      | 0          | 0.23      | 0          | 0.32      | 0          | 0.27      | 0          | 0.38      | 0          |
| 0.98      | 0          | 0.19      | 0          | 0.31      | 0          | 0.25      | 0          | 0.21      | 0          | 0.21      | 0          |
| 0.25      | 0          | 0.21      | 0          | 0.22      | 0          | 0.23      | 0          | 0.22      | 0          | 0.20      | 0          |
| 0.22      | 0          | 0.21      | 0          | 0.24      | 0          | 0.25      | 0          | 0.20      | 0          | 0.20      | 0          |
| 0.20      | 0          | 0.20      | 0          | 0.24      | 0          | 0.23      | 0          | 0.22      | 0          | 0.24      | 0          |
| 0.19      | 0          | 0.18      | 0          | 0.23      | 0          | 0.22      | 0          | 0.20      | 0          | 0.32      | 0          |
| 0.20      | 0          | 0.19      | 0          | NA        | NA         | 0.22      | 0          | 0.21      | 0          | 0.37      | 0          |
| 0.18      | 0          | 0.22      | 0          | NA        | NA         | 0.24      | 0          | 0.18      | 0          | 1.06      | 0          |
| 0.18      | 0          | 0.16      | 0          | NA        | NA         | 0.28      | 0          | 0.20      | 0          | 0.21      | 0          |
| 0.22      | 0          | 10.33     | 0          | NA        | NA         | 0.28      | 0          | 0.20      | 0          | 0.19      | 0          |
| 0.16      | 0          | 7.17      | 1          | NA        | NA         | 0.35      | 0          | 0.19      | 0          | 0.41      | 0          |
| 0.21      | 0          | 0.26      | 1          | NA        | NA         | 0.30      | 0          | 0.20      | 0          | 0.22      | 0          |
| 0.19      | 0          | 0.18      | 1          | NA        | NA         | 0.27      | 0          | 0.21      | 0          | 0.22      | 0          |
| 0.19      | 0          | 0.21      | 1          | NA        | NA         | 0.31      | 0          | 0.19      | 0          | 0.21      | 0          |
| 0.19      | 0          | 0.27      | 1          | NA        | NA         | 0.24      | 0          | 0.22      | 0          | 0.22      | 0          |
| 0.21      | 0          | 0.20      | 1          | NA        | NA         | 0.22      | 0          | 0.20      | 0          | 0.25      | 0          |

| time<br>A | leuko<br>A | time<br>A | leuko<br>A | time<br>B | leuko<br>B | time<br>C | leuko<br>C | time<br>D | leuko<br>D | time<br>E | leuko<br>E |
|-----------|------------|-----------|------------|-----------|------------|-----------|------------|-----------|------------|-----------|------------|
| 0.18      | 0          | 0.15      | 1          | NA        | NA         | 0.21      | 0          | 0.21      | 0          | 0.35      | 0          |
| 0.19      | 0          | 0.17      | 1          | NA        | NA         | 0.22      | 0          | 0.20      | 0          | 0.24      | 0          |
| 0.22      | 0          | 0.15      | 1          | NA        | NA         | 0.22      | 0          | 0.21      | 0          | 0.28      | 0          |
| 0.20      | 0          | 0.10      | 1          | NA        | NA         | 0.42      | 0          | 0.21      | 0          | 0.24      | 0          |
| 0.21      | 0          | 0.21      | 1          | NA        | NA         | 0.29      | 0          | 0.21      | 0          | 0.22      | 0          |
| 0.20      | 0          | 0.11      | 1          | NA        | NA         | 0.38      | 0          | 0.23      | 0          | 0.22      | 0          |
| 0.20      | 0          | 0.17      | 1          | NA        | NA         | 0.30      | 0          | 0.23      | 0          | 1.30      | 0          |
| 0.20      | 0          | 0.13      | 1          | NA        | NA         | 0.32      | 0          | 0.20      | 0          | 0.30      | 0          |
| 0.21      | 0          | 0.16      | 1          | NA        | NA         | 0.26      | 0          | 0.22      | 0          | 0.21      | 0          |
| 0.18      | 0          | 0.12      | 1          | NA        | NA         | 0.63      | 0          | 0.19      | 0          | 0.24      | 0          |
| 0.19      | 0          | 0.17      | 1          | NA        | NA         | 0.22      | 0          | 0.21      | 0          | NA        | NA         |
| 0.19      | 0          | 0.19      | 1          | NA        | NA         | 0.29      | 0          | 0.22      | 0          | NA        | NA         |
| 0.21      | 0          | 0.88      | 0          | NA        | NA         | 0.26      | 0          | 0.22      | 0          | NA        | NA         |
| 0.20      | 0          | 0.24      | 0          | NA        | NA         | 0.24      | 0          | 0.19      | 0          | NA        | NA         |
| 0.20      | 0          | 0.18      | 0          | NA        | NA         | 0.31      | 0          | 0.72      | 0          | NA        | NA         |
| 0.21      | 0          | 1.53      | 0          | NA        | NA         | 0.28      | 0          | 0.22      | 0          | NA        | NA         |
| 0.21      | 0          | 1.14      | 0          | NA        | NA         | 0.23      | 0          | 0.24      | 0          | NA        | NA         |
| 0.19      | 0          | 0.23      | 0          | NA        | NA         | 0.25      | 0          | 0.23      | 0          | NA        | NA         |
| 0.21      | 0          | 0.21      | 0          | NA        | NA         | 0.24      | 0          | 0.23      | 0          | NA        | NA         |
| 0.18      | 0          | 0.16      | 0          | NA        | NA         | 0.30      | 0          | 0.20      | 0          | NA        | NA         |
| 0.20      | 0          | 0.19      | 0          | NA        | NA         | 0.25      | 0          | 0.22      | 0          | NA        | NA         |
| 0.18      | 0          | 0.17      | 0          | NA        | NA         | 0.58      | 0          | 0.20      | 0          | NA        | NA         |
| 0.20      | 0          | 0.30      | 0          | NA        | NA         | 0.30      | 0          | 0.23      | 0          | NA        | NA         |
| 0.21      | 0          | 0.17      | 0          | NA        | NA         | 0.27      | 0          | 0.22      | 0          | NA        | NA         |
| 0.20      | 0          | 0.17      | 0          | NA        | NA         | 0.61      | 0          | 0.22      | 0          | NA        | NA         |
| 0.23      | 0          | 0.19      | 0          | NA        | NA         | 0.24      | 0          | 0.22      | 0          | NA        | NA         |
| 0.22      | 0          | 0.21      | 0          | NA        | NA         | 0.28      | 0          | 0.22      | 0          | NA        | NA         |
| 0.21      | 0          | 0.18      | 0          | NA        | NA         | 0.23      | 0          | 0.22      | 0          | NA        | NA         |
| 0.23      | 0          | 0.19      | 0          | NA        | NA         | 0.26      | 0          | 0.21      | 0          | NA        | NA         |
| 0.19      | 0          | 0.19      | 0          | NA        | NA         | 0.21      | 0          | 0.22      | 0          | NA        | NA         |
| 0.22      | 0          | 0.16      | 0          | NA        | NA         | 0.19      | 0          | 0.22      | 0          | NA        | NA         |
| 0.20      | 0          | 0.18      | 0          | NA        | NA         | 0.29      | 0          | 0.24      | 0          | NA        | NA         |
| 0.19      | 0          | 0.26      | 0          | NA        | NA         | 0.29      | 0          | 0.22      | 0          | NA        | NA         |
| 0.19      | 0          | 0.23      | 0          | NA        | NA         | 0.23      | 0          | 0.19      | 0          | NA        | NA         |
| 0.21      | 0          | 0.18      | 0          | NA        | NA         | 0.23      | 0          | 0.20      | 0          | NA        | NA         |
| 0.21      | 0          | 0.19      | 0          | NA        | NA         | 0.24      | 0          | 0.21      | 0          | NA        | NA         |
| 0.21      | 0          | 0.19      | 0          | NA        | NA         | 0.25      | 0          | 0.22      | 0          | NA        | NA         |
| 0.23      | 0          | 0.19      | 0          | NA        | NA         | 0.27      | 0          | 0.20      | 0          | NA        | NA         |
| 0.21      | 0          | 0.21      | 0          | NA        | NA         | 0.29      | 0          | 0.19      | 0          | NA        | NA         |
| 0.21      | 0          | 0.18      | 0          | NA        | NA         | 0.65      | 0          | 0.20      | 0          | NA        | NA         |
| 0.22      | 0          | 0.19      | 0          | NA        | NA         | 0.24      | 0          | 0.20      | 0          | NA        | NA         |
| 0.23      | 0          | 0.19      | 0          | NA        | NA         | 0.24      | 0          | 0.21      | 0          | NA        | NA         |
| NA        | NA         | 0.20      | 0          | NA        | NA         | 0.23      | 0          | 0.21      | 0          | NA        | NA         |
| NA        | NA         | 0.18      | 0          | NA        | NA         | 0.26      | 0          | 0.21      | 0          | NA        | NA         |
| NA        | NA         | 0.20      | 0          | NA        | NA         | 0.26      | 0          | 0.35      | 0          | NA        | NA         |
| NA        | NA         | 0.21      | 0          | NA        | NA         | 0.28      | 0          | 0.20      | 0          | NA        | NA         |
| NA        | NA         | 0.22      | 0          | NA        | NA         | 0.26      | 0          | 0.20      | 0          | NA        | NA         |
| NA        | NA         | 0.18      | 0          | NA        | NA         | 0.23      | 0          | 0.19      | 0          | NA        | NA         |
| NA        | NA         | 0.19      | 0          | NA        | NA         | 0.26      | 0          | 0.20      | 0          | NA        | NA         |
| NA        | NA         | 0.19      | 0          | NA        | NA         | 0.23      | 0          | 0.20      | 0          | NA        | NA         |
| NA        | NA         | 0.20      | 0          | NA        | NA         | 0.22      | 0          | 0.20      | 0          | NA        | NA         |



| time<br>A | leuko<br>A | time<br>A | leuko<br>A | time<br>B | leuko<br>B | time<br>C | leuko<br>C | time<br>D | leuko<br>D | time<br>E | leuko<br>E |
|-----------|------------|-----------|------------|-----------|------------|-----------|------------|-----------|------------|-----------|------------|
| NA        | NA         | 0.19      | 0          | NA        | NA         | 0.26      | 0          | 0.21      | 0          | NA        | NA         |
| NA        | NA         | NA        | NA         | NA        | NA         | 0.40      | 0          | 0.18      | 0          | NA        | NA         |
| NA        | NA         | NA        | NA         | NA        | NA         | 0.21      | 0          | 0.16      | 0          | NA        | NA         |
| NA        | NA         | NA        | NA         | NA        | NA         | 0.22      | 0          | 0.19      | 0          | NA        | NA         |
| NA        | NA         | NA        | NA         | NA        | NA         | 0.21      | 0          | 0.21      | 0          | NA        | NA         |
| NA        | NA         | NA        | NA         | NA        | NA         | 0.23      | 0          | 0.20      | 0          | NA        | NA         |
| NA        | NA         | NA        | NA         | NA        | NA         | 0.35      | 0          | 0.18      | 0          | NA        | NA         |
| NA        | NA         | NA        | NA         | NA        | NA         | 0.26      | 0          | 0.18      | 0          | NA        | NA         |
| NA        | NA         | NA        | NA         | NA        | NA         | 0.33      | 0          | 0.20      | 0          | NA        | NA         |
| NA        | NA         | NA        | NA         | NA        | NA         | 0.22      | 0          | 0.18      | 0          | NA        | NA         |
| NA        | NA         | NA        | NA         | NA        | NA         | 0.23      | 0          | 0.21      | 0          | NA        | NA         |
| NA        | NA         | NA        | NA         | NA        | NA         | 0.25      | 0          | 0.20      | 0          | NA        | NA         |
| NA        | NA         | NA        | NA         | NA        | NA         | 0.39      | 0          | 0.20      | 0          | NA        | NA         |
| NA        | NA         | NA        | NA         | NA        | NA         | 0.19      | 0          | 0.20      | 0          | NA        | NA         |
| NA        | NA         | NA        | NA         | NA        | NA         | 0.21      | 0          | 0.21      | 0          | NA        | NA         |
| NA        | NA         | NA        | NA         | NA        | NA         | 0.24      | 0          | 0.18      | 0          | NA        | NA         |
| NA        | NA         | NA        | NA         | NA        | NA         | 0.24      | 0          | 0.20      | 0          | NA        | NA         |
| NA        | NA         | NA        | NA         | NA        | NA         | 0.21      | 0          | 0.20      | 0          | NA        | NA         |
| NA        | NA         | NA        | NA         | NA        | NA         | 0.24      | 0          | 0.21      | 0          | NA        | NA         |
| NA        | NA         | NA        | NA         | NA        | NA         | 0.21      | 0          | 0.22      | 0          | NA        | NA         |
| NA        | NA         | NA        | NA         | NA        | NA         | 0.22      | 0          | 0.20      | 0          | NA        | NA         |
| NA        | NA         | NA        | NA         | NA        | NA         | 0.30      | 0          | 0.20      | 0          | NA        | NA         |
| NA        | NA         | NA        | NA         | NA        | NA         | 0.21      | 0          | 0.20      | 0          | NA        | NA         |
| NA        | NA         | NA        | NA         | NA        | NA         | 0.22      | 0          | 0.21      | 0          | NA        | NA         |
| NA        | NA         | NA        | NA         | NA        | NA         | 0.27      | 0          | 0.21      | 0          | NA        | NA         |
| NA        | NA         | NA        | NA         | NA        | NA         | 0.29      | 0          | 0.18      | 0          | NA        | NA         |
| NA        | NA         | NA        | NA         | NA        | NA         | 0.31      | 0          | 0.22      | 0          | NA        | NA         |
| NA        | NA         | NA        | NA         | NA        | NA         | 0.23      | 0          | 0.19      | 0          | NA        | NA         |
| NA        | NA         | NA        | NA         | NA        | NA         | 0.28      | 0          | 0.19      | 0          | NA        | NA         |
| NA        | NA         | NA        | NA         | NA        | NA         | 0.26      | 0          | 0.20      | 0          | NA        | NA         |
| NA        | NA         | NA        | NA         | NA        | NA         | 0.42      | 0          | 0.21      | 0          | NA        | NA         |
| NA        | NA         | NA        | NA         | NA        | NA         | 0.25      | 0          | 0.21      | 0          | NA        | NA         |
| NA        | NA         | NA        | NA         | NA        | NA         | 0.21      | 0          | 0.20      | 0          | NA        | NA         |
| NA        | NA         | NA        | NA         | NA        | NA         | 0.23      | 0          | 0.20      | 0          | NA        | NA         |
| NA        | NA         | NA        | NA         | NA        | NA         | 0.23      | 0          | 0.20      | 0          | NA        | NA         |
| NA        | NA         | NA        | NA         | NA        | NA         | 0.32      | 0          | 0.18      | 0          | NA        | NA         |
| NA        | NA         | NA        | NA         | NA        | NA         | 0.21      | 0          | 0.20      | 0          | NA        | NA         |
| NA        | NA         | NA        | NA         | NA        | NA         | 0.21      | 0          | 0.19      | 0          | NA        | NA         |
| NA        | NA         | NA        | NA         | NA        | NA         | 0.33      | 0          | 0.20      | 0          | NA        | NA         |
| NA        | NA         | NA        | NA         | NA        | NA         | 0.44      | 0          | 0.19      | 0          | NA        | NA         |
| NA        | NA         | NA        | NA         | NA        | NA         | 0.21      | 0          | 0.20      | 0          | NA        | NA         |
| NA        | NA         | NA        | NA         | NA        | NA         | 0.25      | 0          | 0.17      | 0          | NA        | NA         |
| NA        | NA         | NA        | NA         | NA        | NA         | 0.22      | 0          | 0.19      | 0          | NA        | NA         |
| NA        | NA         | NA        | NA         | NA        | NA         | 0.24      | 0          | 0.20      | 0          | NA        | NA         |
| NA        | NA         | NA        | NA         | NA        | NA         | 0.24      | 0          | 0.21      | 0          | NA        | NA         |
| NA        | NA         | NA        | NA         | NA        | NA         | 0.27      | 0          | 0.20      | 0          | NA        | NA         |
| NA        | NA         | NA        | NA         | NA        | NA         | 0.24      | 0          | 0.20      | 0          | NA        | NA         |
| NA        | NA         | NA        | NA         | NA        | NA         | 0.24      | 0          | 0.22      | 0          | NA        | NA         |
| NA        | NA         | NA        | NA         | NA        | NA         | 0.43      | 0          | 0.16      | 0          | NA        | NA         |
| NA        | NA         | NA        | NA         | NA        | NA         | 0.34      | 0          | 0.20      | 0          | NA        | NA         |
| NA        | NA         | NA        | NA         | NA        | NA         | 0.21      | 0          | 0.20      | 0          | NA        | NA         |

| time<br>A | leuko<br>A | time<br>A | leuko<br>A | time<br>B | leuko<br>B | time<br>C | leuko<br>C | time<br>D | leuko<br>D | time<br>E | leuko<br>E |
|-----------|------------|-----------|------------|-----------|------------|-----------|------------|-----------|------------|-----------|------------|
| NA        | NA         | NA        | NA         | NA        | NA         | 0.23      | 0          | 0.19      | 0          | NA        | NA         |
| NA        | NA         | NA        | NA         | NA        | NA         | 0.42      | 0          | 0.21      | 0          | NA        | NA         |
| NA        | NA         | NA        | NA         | NA        | NA         | 0.22      | 0          | 0.18      | 0          | NA        | NA         |
| NA        | NA         | NA        | NA         | NA        | NA         | 0.28      | 0          | 0.17      | 0          | NA        | NA         |
| NA        | NA         | NA        | NA         | NA        | NA         | 0.29      | 0          | 0.19      | 0          | NA        | NA         |
| NA        | NA         | NA        | NA         | NA        | NA         | 0.23      | 0          | 0.18      | 0          | NA        | NA         |
| NA        | NA         | NA        | NA         | NA        | NA         | 0.28      | 0          | 0.17      | 0          | NA        | NA         |
| NA        | NA         | NA        | NA         | NA        | NA         | 0.21      | 0          | 0.18      | 0          | NA        | NA         |
| NA        | NA         | NA        | NA         | NA        | NA         | 0.24      | 0          | 0.18      | 0          | NA        | NA         |
| NA        | NA         | NA        | NA         | NA        | NA         | 0.23      | 0          | 0.20      | 0          | NA        | NA         |
| NA        | NA         | NA        | NA         | NA        | NA         | 0.36      | 0          | 0.15      | 0          | NA        | NA         |
| NA        | NA         | NA        | NA         | NA        | NA         | 0.21      | 0          | 0.21      | 0          | NA        | NA         |
| NA        | NA         | NA        | NA         | NA        | NA         | 0.30      | 0          | 0.19      | 0          | NA        | NA         |
| NA        | NA         | NA        | NA         | NA        | NA         | 0.25      | 0          | 0.21      | 0          | NA        | NA         |
| NA        | NA         | NA        | NA         | NA        | NA         | 0.39      | 0          | 0.20      | 0          | NA        | NA         |
| NA        | NA         | NA        | NA         | NA        | NA         | 0.20      | 0          | 0.19      | 0          | NA        | NA         |
| NA        | NA         | NA        | NA         | NA        | NA         | 0.35      | 0          | 0.19      | 0          | NA        | NA         |
| NA        | NA         | NA        | NA         | NA        | NA         | 0.35      | 0          | 0.20      | 0          | NA        | NA         |
| NA        | NA         | NA        | NA         | NA        | NA         | 0.48      | 0          | 0.19      | 0          | NA        | NA         |
| NA        | NA         | NA        | NA         | NA        | NA         | 0.26      | 0          | 0.20      | 0          | NA        | NA         |
| NA        | NA         | NA        | NA         | NA        | NA         | 0.28      | 0          | 0.20      | 0          | NA        | NA         |
| NA        | NA         | NA        | NA         | NA        | NA         | 0.26      | 0          | 0.21      | 0          | NA        | NA         |
| NA        | NA         | NA        | NA         | NA        | NA         | 0.28      | 0          | 0.21      | 0          | NA        | NA         |
| NA        | NA         | NA        | NA         | NA        | NA         | 0.25      | 0          | 0.20      | 0          | NA        | NA         |
| NA        | NA         | NA        | NA         | NA        | NA         | 0.24      | 0          | 0.21      | 0          | NA        | NA         |
| NA        | NA         | NA        | NA         | NA        | NA         | 0.34      | 0          | 0.16      | 0          | NA        | NA         |
| NA        | NA         | NA        | NA         | NA        | NA         | 0.23      | 0          | 0.26      | 0          | NA        | NA         |
| NA        | NA         | NA        | NA         | NA        | NA         | 0.30      | 0          | 0.22      | 0          | NA        | NA         |
| NA        | NA         | NA        | NA         | NA        | NA         | 0.28      | 0          | 0.22      | 0          | NA        | NA         |
| NA        | NA         | NA        | NA         | NA        | NA         | 0.22      | 0          | 0.20      | 0          | NA        | NA         |
| NA        | NA         | NA        | NA         | NA        | NA         | 0.30      | 0          | 0.23      | 0          | NA        | NA         |
| NA        | NA         | NA        | NA         | NA        | NA         | 0.24      | 0          | 0.22      | 0          | NA        | NA         |
| NA        | NA         | NA        | NA         | NA        | NA         | 0.24      | 0          | 0.19      | 0          | NA        | NA         |
| NA        | NA         | NA        | NA         | NA        | NA         | 0.26      | 0          | 0.22      | 0          | NA        | NA         |
| NA        | NA         | NA        | NA         | NA        | NA         | 0.28      | 0          | 0.22      | 0          | NA        | NA         |
| NA        | NA         | NA        | NA         | NA        | NA         | 0.27      | 0          | 0.23      | 0          | NA        | NA         |
| NA        | NA         | NA        | NA         | NA        | NA         | 0.39      | 0          | 0.22      | 0          | NA        | NA         |
| NA        | NA         | NA        | NA         | NA        | NA         | 0.26      | 0          | 0.21      | 0          | NA        | NA         |
| NA        | NA         | NA        | NA         | NA        | NA         | 0.23      | 0          | 0.20      | 0          | NA        | NA         |
| NA        | NA         | NA        | NA         | NA        | NA         | 0.32      | 0          | 0.19      | 0          | NA        | NA         |
| NA        | NA         | NA        | NA         | NA        | NA         | 0.22      | 0          | 0.21      | 0          | NA        | NA         |
| NA        | NA         | NA        | NA         | NA        | NA         | 0.27      | 0          | 0.21      | 0          | NA        | NA         |
| NA        | NA         | NA        | NA         | NA        | NA         | 0.31      | 0          | 0.21      | 0          | NA        | NA         |
| NA        | NA         | NA        | NA         | NA        | NA         | 0.19      | 0          | 0.19      | 0          | NA        | NA         |
| NA        | NA         | NA        | NA         | NA        | NA         | 0.30      | 0          | 0.21      | 0          | NA        | NA         |
| NA        | NA         | NA        | NA         | NA        | NA         | 0.33      | 0          | 0.20      | 0          | NA        | NA         |
| NA        | NA         | NA        | NA         | NA        | NA         | 0.22      | 0          | 0.16      | 0          | NA        | NA         |
| NA        | NA         | NA        | NA         | NA        | NA         | 0.23      | 0          | 0.20      | 0          | NA        | NA         |
| NA        | NA         | NA        | NA         | NA        | NA         | 0.37      | 0          | 0.20      | 0          | NA        | NA         |
| NA        | NA         | NA        | NA         | NA        | NA         | 0.29      | 0          | 0.20      | 0          | NA        | NA         |
| NA        | NA         | NA        | NA         | NA        | NA         | 0.24      | 0          | NA        | NA         | NA        | NA         |

| time<br>A | leuko<br>A | time<br>A | leuko<br>A | time<br>B | leuko<br>B | time<br>C | leuko<br>C | time<br>D | leuko<br>D | time<br>E | leuko<br>E |
|-----------|------------|-----------|------------|-----------|------------|-----------|------------|-----------|------------|-----------|------------|
| NA        | NA         | NA        | NA         | NA        | NA         | 0.25      | 0          | NA        | NA         | NA        | NA         |
| NA        | NA         | NA        | NA         | NA        | NA         | 0.27      | 0          | NA        | NA         | NA        | NA         |
| NA        | NA         | NA        | NA         | NA        | NA         | 0.24      | 0          | NA        | NA         | NA        | NA         |
| NA        | NA         | NA        | NA         | NA        | NA         | 0.37      | 0          | NA        | NA         | NA        | NA         |
| NA        | NA         | NA        | NA         | NA        | NA         | 1.05      | 0          | NA        | NA         | NA        | NA         |
| NA        | NA         | NA        | NA         | NA        | NA         | 0.24      | 0          | NA        | NA         | NA        | NA         |

## 2 Leukocyte and parasite counts per HPFs

We present here the result of the (calibrated) HPFs calling algorithm. For each HPF, the leukocyte and parasite counts are given.

## 2.1 A094

Table 10: leuko/parasite data per HPF for the six readings of TBS A094.

|       | leuko B | para B | leuko D | para D |
|-------|---------|--------|---------|--------|
| HPF1  | 0       | 0      | 0       | 0      |
| HPF2  | 10      | 0      | 9       | 0      |
| HPF3  | 8       | 0      | 6       | 0      |
| HPF4  | 7       | 0      | 8       | 0      |
| HPF5  | 7       | 0      | 10      | 0      |
| HPF6  | 5       | 0      | 9       | 0      |
| HPF7  | 7       | 0      | 8       | 0      |
| HPF8  | 8       | 0      | 9       | 0      |
| HPF9  | 7       | 0      | 1       | 0      |
| HPF10 | 10      | 0      | 9       | 0      |
| HPF11 | 7       | 0      | 8       | 0      |
| HPF12 | 7       | 0      | 20      | 0      |
| HPF13 | 7       | 0      | 8       | 0      |
| HPF14 | 7       | 0      | 7       | 0      |
| HPF15 | 7       | 0      | 8       | 0      |
| HPF16 | 6       | 0      | 9       | 0      |
| HPF17 | 6       | 0      | 10      | 0      |
| HPF18 | 8       | 0      | 11      | 0      |
| HPF19 | 6       | 0      | 13      | 0      |
| HPF20 | 6       | 0      | 10      | 0      |
| HPF21 | 6       | 0      | 8       | 0      |
| HPF22 | 8       | 0      | 16      | 0      |
| HPF23 | 8       | 0      | 9       | 0      |
| HPF24 | 6       | 0      | 8       | 0      |
| HPF25 | 6       | 0      | 5       | 0      |
| HPF26 | 7       | 0      | 8       | 0      |
| HPF27 | 8       | 0      | 5       | 0      |
| HPF28 | 8       | 0      | 10      | 0      |
| HPF29 | 9       | 0      | 9       | 0      |
| HPF30 | 6       | 0      | 9       | 0      |
| HPF31 | 9       | 0      | 10      | 0      |
| HPF32 | 8       | 0      | 10      | 0      |
| HPF33 | 7       | 0      | 10      | 0      |
| HPF34 | 2       | 0      | 10      | 0      |
| HPF35 | 7       | 0      | 12      | 0      |
| HPF36 | 9       | 0      | 12      | 0      |
| HPF37 | 15      | 0      | 7       | 0      |
| HPF38 | 11      | 0      | 7       | 0      |
| HPF39 | 6       | 0      | 6       | 0      |
| HPF40 | 15      | 0      | 9       | 0      |
| HPF41 | 12      | 0      | 13      | 0      |
| HPF42 | 10      | 0      | 16      | 0      |
| HPF43 | 16      | 0      | 7       | 0      |
| HPF44 | 17      | 0      | 9       | 0      |
| HPF45 | 11      | 0      | 6       | 0      |
| HPF46 | 9       | 0      | 7       | 0      |
| HPF47 | 6       | 0      | 15      | 0      |
| HPF48 | 7       | 0      | 21      | 0      |

|       | leuko B | para B | leuko D | para D |
|-------|---------|--------|---------|--------|
| HPF49 | 7       | 0      | 4       | 0      |
| HPF50 | 5       | 0      | 8       | 0      |
| HPF51 | 7       | 0      | 4       | 0      |
| HPF52 | 6       | 0      | 9       | 0      |
| HPF53 | 7       | 0      | 13      | 0      |
| HPF54 | 7       | 0      | 12      | 0      |
| HPF55 | 7       | 0      | 5       | 0      |
| HPF56 | 7       | 0      | NA      | NA     |
| HPF57 | 7       | 0      | NA      | NA     |
| HPF58 | 7       | 0      | NA      | NA     |
| HPF59 | 8       | 0      | NA      | NA     |
| HPF60 | 8       | 0      | NA      | NA     |
| HPF61 | 8       | 0      | NA      | NA     |
| HPF62 | 7       | 0      | NA      | NA     |
| HPF63 | 1       | 0      | NA      | NA     |
| HPF64 | 7       | 0      | NA      | NA     |
| HPF65 | 7       | 0      | NA      | NA     |
| HPF66 | 5       | 0      | NA      | NA     |
| HPF67 | 3       | 0      | NA      | NA     |
|       | 506     | 0      | 502     | 0      |

## 2.2 A098

Table 11: leuko/parasite data per HPF for the six readings of TBS A098.

|       | leuko<br>A | para<br>A | leuko<br>A | para<br>A | leuko<br>B | para<br>B | leuko<br>C | para<br>C | leuko<br>D | para<br>D | leuko<br>E | para<br>E |
|-------|------------|-----------|------------|-----------|------------|-----------|------------|-----------|------------|-----------|------------|-----------|
| HPF1  | 0          | 0         | 0          | 2         | 0          | 1         | 0          | 0         | 0          | 0         | 0          | 0         |
| HPF2  | 7          | 0         | 6          | 0         | 6          | 0         | 8          | 0         | 5          | 0         | 6          | 0         |
| HPF3  | 7          | 0         | 9          | 0         | 8          | 0         | 9          | 0         | 8          | 0         | 6          | 0         |
| HPF4  | 6          | 0         | 10         | 0         | 10         | 0         | 8          | 0         | 6          | 4         | 2          | 0         |
| HPF5  | 6          | 0         | 11         | 0         | 7          | 0         | 10         | 0         | 7          | 0         | 6          | 0         |
| HPF6  | 7          | 0         | 9          | 0         | 6          | 1         | 8          | 0         | 9          | 0         | 6          | 1         |
| HPF7  | 6          | 0         | 8          | 0         | 9          | 1         | 7          | 0         | 13         | 1         | 2          | 1         |
| HPF8  | 6          | 0         | 6          | 0         | 9          | 0         | 6          | 0         | 6          | 0         | 10         | 0         |
| HPF9  | 6          | 0         | 5          | 0         | 8          | 1         | 9          | 0         | 12         | 0         | 7          | 0         |
| HPF10 | 6          | 0         | 7          | 0         | 8          | 0         | 7          | 0         | 7          | 0         | 7          | 2         |
| HPF11 | 9          | 0         | 8          | 0         | 8          | 0         | 10         | 0         | 8          | 0         | 9          | 0         |
| HPF12 | 7          | 0         | 9          | 0         | 5          | 0         | 12         | 0         | 11         | 2         | 8          | 1         |
| HPF13 | 7          | 0         | 5          | 0         | 10         | 0         | 10         | 0         | 7          | 0         | 4          | 1         |
| HPF14 | 7          | 0         | 9          | 0         | 8          | 0         | 5          | 0         | 6          | 1         | 2          | 1         |
| HPF15 | 8          | 0         | 8          | 0         | 6          | 0         | 9          | 0         | 2          | 1         | 11         | 0         |
| HPF16 | 8          | 0         | 13         | 0         | 7          | 0         | 9          | 0         | 8          | 0         | 7          | 1         |
| HPF17 | 1          | 0         | 7          | 1         | 6          | 0         | 5          | 0         | 7          | 0         | 8          | 0         |
| HPF18 | 8          | 1         | 7          | 0         | 18         | 1         | 6          | 0         | 8          | 1         | 5          | 1         |
| HPF19 | 7          | 0         | 8          | 0         | 7          | 0         | 7          | 0         | 8          | 0         | 11         | 1         |
| HPF20 | 5          | 3         | 8          | 1         | 6          | 2         | 7          | 0         | 4          | 0         | 3          | 1         |
| HPF21 | 8          | 0         | 5          | 1         | 10         | 0         | 9          | 0         | 10         | 0         | 7          | 0         |
| HPF22 | 8          | 0         | 10         | 0         | 6          | 0         | 4          | 0         | 16         | 2         | 9          | 0         |
| HPF23 | 8          | 1         | 8          | 0         | 7          | 1         | 9          | 0         | 8          | 0         | 9          | 0         |
| HPF24 | 7          | 0         | 10         | 0         | 9          | 0         | 8          | 0         | 11         | 1         | 7          | 0         |
| HPF25 | 6          | 0         | 5          | 1         | 13         | 0         | 8          | 0         | 9          | 0         | 5          | 1         |
| HPF26 | 10         | 3         | 3          | 1         | 8          | 0         | 8          | 0         | 7          | 1         | 4          | 1         |
| HPF27 | 10         | 1         | 2          | 2         | 6          | 0         | 8          | 0         | 4          | 1         | 3          | 1         |
| HPF28 | 8          | 0         | 5          | 2         | 6          | 1         | 7          | 0         | 10         | 0         | 7          | 0         |
| HPF29 | 5          | 1         | 6          | 0         | 8          | 0         | 6          | 0         | NA         | NA        | 5          | 0         |
| HPF30 | 8          | 1         | NA         | NA        | 6          | 0         | 8          | 0         | NA         | NA        | 7          | 1         |
| HPF31 | NA         | NA        | NA         | NA        | 8          | 0         | 8          | 0         | NA         | NA        | 7          | 0         |
| HPF32 | NA         | NA        | NA         | NA        | 8          | 0         | 9          | 0         | NA         | NA        | 6          | 0         |
| HPF33 | NA         | NA        | NA         | NA        | 6          | 0         | 8          | 0         | NA         | NA        | 7          | 1         |
| HPF34 | NA         | NA        | NA         | NA        | 6          | 1         | 7          | 0         | NA         | NA        | NA         | NA        |
| HPF35 | NA         | NA        | NA         | NA        | 1          | 1         | 9          | 0         | NA         | NA        | NA         | NA        |
| HPF36 | NA         | NA        | NA         | NA        | 8          | 0         | 16         | 0         | NA         | NA        | NA         | NA        |
| HPF37 | NA         | NA        | NA         | NA        | 4          | 0         | 10         | 0         | NA         | NA        | NA         | NA        |
| HPF38 | NA         | NA        | NA         | NA        | 9          | 0         | 10         | 0         | NA         | NA        | NA         | NA        |
| HPF39 | NA         | NA        | NA         | NA        | 9          | 0         | 17         | 0         | NA         | NA        | NA         | NA        |
| HPF40 | NA         | NA        | NA         | NA        | 7          | 0         | 10         | 0         | NA         | NA        | NA         | NA        |
| HPF41 | NA         | NA        | NA         | NA        | 9          | 0         | 9          | 0         | NA         | NA        | NA         | NA        |
| HPF42 | NA         | NA        | NA         | NA        | 6          | 1         | 10         | 0         | NA         | NA        | NA         | NA        |
| HPF43 | NA         | NA        | NA         | NA        | 8          | 0         | 7          | 0         | NA         | NA        | NA         | NA        |
| HPF44 | NA         | NA        | NA         | NA        | 8          | 0         | 10         | 0         | NA         | NA        | NA         | NA        |
| HPF45 | NA         | NA        | NA         | NA        | 6          | 0         | 17         | 0         | NA         | NA        | NA         | NA        |
| HPF46 | NA         | NA        | NA         | NA        | 4          | 0         | 14         | 0         | NA         | NA        | NA         | NA        |
| HPF47 | NA         | NA        | NA         | NA        | 6          | 0         | 13         | 0         | NA         | NA        | NA         | NA        |

|       | leuko<br>A | para<br>A | leuko<br>A | para<br>A | leuko<br>B | para<br>B | leuko<br>C | para<br>C | leuko<br>D | para<br>D | leuko<br>E | para<br>E |
|-------|------------|-----------|------------|-----------|------------|-----------|------------|-----------|------------|-----------|------------|-----------|
| HPF48 | NA         | NA        | NA         | NA        | 9          | 0         | 12         | 0         | NA         | NA        | NA         | NA        |
| HPF49 | NA         | NA        | NA         | NA        | 6          | 0         | 6          | 0         | NA         | NA        | NA         | NA        |
| HPF50 | NA         | NA        | NA         | NA        | 9          | 0         | 6          | 0         | NA         | NA        | NA         | NA        |
| HPF51 | NA         | NA        | NA         | NA        | 5          | 1         | 9          | 0         | NA         | NA        | NA         | NA        |
| HPF52 | NA         | NA        | NA         | NA        | 3          | 1         | 22         | 0         | NA         | NA        | NA         | NA        |
| HPF53 | NA         | NA        | NA         | NA        | 7          | 0         | 17         | 0         | NA         | NA        | NA         | NA        |
| HPF54 | NA         | NA        | NA         | NA        | 8          | 0         | 14         | 0         | NA         | NA        | NA         | NA        |
| HPF55 | NA         | NA        | NA         | NA        | 9          | 0         | 9          | 0         | NA         | NA        | NA         | NA        |
| HPF56 | NA         | NA        | NA         | NA        | 5          | 3         | 5          | 0         | NA         | NA        | NA         | NA        |
| HPF57 | NA         | NA        | NA         | NA        | 9          | 0         | 7          | 0         | NA         | NA        | NA         | NA        |
| HPF58 | NA         | NA        | NA         | NA        | 5          | 0         | 7          | 0         | NA         | NA        | NA         | NA        |
| HPF59 | NA         | NA        | NA         | NA        | 11         | 0         | 10         | 0         | NA         | NA        | NA         | NA        |
| HPF60 | NA         | NA        | NA         | NA        | 5          | 0         | 6          | 0         | NA         | NA        | NA         | NA        |
| HPF61 | NA         | NA        | NA         | NA        | 11         | 2         | NA         | NA        | NA         | NA        | NA         | NA        |
| HPF62 | NA         | NA        | NA         | NA        | 11         | 0         | NA         | NA        | NA         | NA        | NA         | NA        |
| HPF63 | NA         | NA        | NA         | NA        | 9          | 0         | NA         | NA        | NA         | NA        | NA         | NA        |
| HPF64 | NA         | NA        | NA         | NA        | 15         | 0         | NA         | NA        | NA         | NA        | NA         | NA        |
| HPF65 | NA         | NA        | NA         | NA        | 9          | 0         | NA         | NA        | NA         | NA        | NA         | NA        |
| HPF66 | NA         | NA        | NA         | NA        | 6          | 1         | NA         | NA        | NA         | NA        | NA         | NA        |
| HPF67 | NA         | NA        | NA         | NA        | 9          | 0         | NA         | NA        | NA         | NA        | NA         | NA        |
| HPF68 | NA         | NA        | NA         | NA        | 8          | 1         | NA         | NA        | NA         | NA        | NA         | NA        |
|       | 202        | 11        | 207        | 11        | 513        | 21        | 541        | 0         | 217        | 15        | 203        | 16        |



## 2.3 A100

Table 12: leuko/parasite data per HPF for the six readings of TBS A100.

|       | leuko<br>A | para<br>A | leuko<br>A | para<br>A | leuko<br>B | para<br>B | leuko<br>C | para<br>C | leuko<br>D | para<br>D | leuko<br>E | para<br>E |
|-------|------------|-----------|------------|-----------|------------|-----------|------------|-----------|------------|-----------|------------|-----------|
| HPF1  | 0          | 0         | 0          | 0         | 0          | 0         | 0          | 0         | 0          | 0         | 0          | 0         |
| HPF2  | 10         | 0         | 11         | 0         | 7          | 0         | 5          | 0         | 14         | 0         | 5          | 0         |
| HPF3  | 6          | 0         | 9          | 0         | 7          | 0         | 9          | 0         | 8          | 0         | 6          | 0         |
| HPF4  | 11         | 0         | 9          | 0         | 16         | 0         | 13         | 0         | 9          | 0         | 10         | 0         |
| HPF5  | 17         | 0         | 11         | 0         | 8          | 0         | 20         | 0         | 13         | 0         | 7          | 0         |
| HPF6  | 12         | 0         | 14         | 0         | 7          | 0         | 20         | 0         | 8          | 0         | 14         | 0         |
| HPF7  | 17         | 0         | 17         | 0         | 11         | 0         | 19         | 0         | 19         | 0         | 5          | 0         |
| HPF8  | 14         | 0         | 16         | 0         | 17         | 0         | 16         | 0         | 6          | 0         | 12         | 0         |
| HPF9  | 27         | 0         | 13         | 0         | 18         | 0         | 17         | 0         | 6          | 0         | 9          | 0         |
| HPF10 | 22         | 0         | 19         | 0         | 8          | 0         | 18         | 0         | 6          | 0         | 11         | 0         |
| HPF11 | 19         | 0         | 21         | 0         | 12         | 0         | 22         | 0         | 6          | 0         | 11         | 0         |
| HPF12 | 19         | 0         | 14         | 0         | 16         | 0         | 17         | 0         | 26         | 0         | 11         | 0         |
| HPF13 | 18         | 0         | 14         | 0         | 7          | 0         | 13         | 0         | 10         | 0         | 8          | 0         |
| HPF14 | 7          | 0         | 14         | 0         | 6          | 0         | 10         | 0         | 10         | 0         | 10         | 0         |
| HPF15 | 17         | 0         | 16         | 0         | 10         | 0         | 6          | 0         | 8          | 0         | 11         | 0         |
| HPF16 | 12         | 0         | 14         | 0         | 11         | 0         | 7          | 0         | 17         | 0         | 5          | 0         |
| HPF17 | 16         | 0         | 14         | 0         | 14         | 0         | 19         | 0         | 24         | 0         | 10         | 0         |
| HPF18 | 8          | 0         | 18         | 0         | 9          | 0         | 18         | 0         | 17         | 0         | 9          | 0         |
| HPF19 | 15         | 0         | 12         | 0         | 9          | 0         | 18         | 0         | 42         | 0         | 7          | 0         |
| HPF20 | 15         | 0         | 7          | 0         | 16         | 0         | 17         | 0         | 13         | 0         | 11         | 0         |
| HPF21 | 13         | 0         | 13         | 0         | 15         | 0         | 7          | 0         | 4          | 0         | 12         | 0         |
| HPF22 | 9          | 0         | 14         | 0         | 14         | 0         | 6          | 0         | 8          | 0         | 11         | 0         |
| HPF23 | 13         | 0         | 17         | 0         | 14         | 0         | 6          | 0         | 28         | 0         | 16         | 0         |
| HPF24 | 15         | 0         | 15         | 0         | 5          | 0         | 6          | 0         | 19         | 0         | 11         | 0         |
| HPF25 | 13         | 0         | 10         | 0         | 14         | 0         | 10         | 0         | 19         | 0         | 11         | 0         |
| HPF26 | 11         | 0         | 8          | 0         | 9          | 0         | 10         | 0         | 16         | 0         | 10         | 0         |
| HPF27 | 16         | 0         | 10         | 0         | 7          | 0         | 16         | 0         | 33         | 0         | 9          | 0         |
| HPF28 | 20         | 0         | 5          | 0         | 7          | 0         | 13         | 0         | 18         | 0         | 16         | 0         |
| HPF29 | 19         | 0         | 7          | 0         | 14         | 0         | 18         | 0         | 31         | 0         | 12         | 0         |
| HPF30 | 13         | 0         | 14         | 0         | 7          | 0         | 9          | 0         | 24         | 0         | 10         | 0         |
| HPF31 | 12         | 0         | 11         | 0         | 13         | 0         | 16         | 0         | 24         | 0         | 19         | 0         |
| HPF32 | 20         | 0         | 11         | 0         | 4          | 0         | 20         | 0         | 13         | 0         | 15         | 0         |
| HPF33 | 13         | 0         | 10         | 0         | 21         | 0         | 9          | 0         | 28         | 0         | 17         | 0         |
| HPF34 | 15         | 0         | 11         | 0         | 14         | 0         | 14         | 0         | NA         | NA        | 13         | 0         |
| HPF35 | 17         | 0         | 14         | 0         | 11         | 0         | 19         | 0         | NA         | NA        | 21         | 0         |
| HPF36 | 13         | 0         | 12         | 0         | 9          | 0         | 7          | 0         | NA         | NA        | 13         | 0         |
| HPF37 | NA         | NA        | 10         | 0         | 6          | 0         | 17         | 0         | NA         | NA        | 16         | 0         |
| HPF38 | NA         | NA        | 16         | 0         | 10         | 0         | 8          | 0         | NA         | NA        | 8          | 0         |
| HPF39 | NA         | NA        | 14         | 0         | 15         | 0         | 15         | 0         | NA         | NA        | 8          | 0         |
| HPF40 | NA         | NA        | 11         | 0         | 7          | 0         | 15         | 0         | NA         | NA        | 13         | 0         |
| HPF41 | NA         | NA        | 19         | 0         | 10         | 0         | 7          | 0         | NA         | NA        | 9          | 0         |
| HPF42 | NA         | NA        | NA         | NA        | 12         | 0         | 10         | 0         | NA         | NA        | 10         | 0         |
| HPF43 | NA         | NA        | NA         | NA        | 19         | 0         | 17         | 0         | NA         | NA        | 7          | 0         |
| HPF44 | NA         | NA        | NA         | NA        | 10         | 0         | 10         | 0         | NA         | NA        | 12         | 0         |
| HPF45 | NA         | NA        | NA         | NA        | 19         | 0         | 23         | 0         | NA         | NA        | 7          | 0         |
| HPF46 | NA         | NA        | NA         | NA        | 16         | 0         | 25         | 0         | NA         | NA        | 9          | 0         |
| HPF47 | NA         | NA        | NA         | NA        | NA         | NA        | NA         | NA        | NA         | NA        | 11         | 0         |

|       | leuko<br>A | para<br>A | leuko<br>A | para<br>A | leuko<br>B | para<br>B | leuko<br>C | para<br>C | leuko<br>D | para<br>D | leuko<br>E | para<br>E |
|-------|------------|-----------|------------|-----------|------------|-----------|------------|-----------|------------|-----------|------------|-----------|
| HPF48 | NA<br>514  | NA<br>0   | NA<br>515  | NA<br>0   | NA<br>511  | NA<br>0   | NA<br>617  | NA<br>0   | NA<br>527  | NA<br>0   | 9<br>507   | 0<br>0    |

## 2.4 OPT211

Table 13: leuko/parasite data per HPF for the six readings of TBS OPT211.

|       | leuko<br>A | para<br>A | leuko<br>A | para<br>A | leuko<br>B | para<br>B | leuko<br>C | para<br>C | leuko<br>D | para<br>D | leuko<br>E | para<br>E |
|-------|------------|-----------|------------|-----------|------------|-----------|------------|-----------|------------|-----------|------------|-----------|
| HPF1  | 0          | 292       | 0          | 0         | 0          | 0         | 0          | 210       | 0          | 386       | 0          | 0         |
| HPF2  | 5          | 0         | 3          | 180       | 12         | 324       | 10         | 398       | 7          | 0         | 4          | 318       |
| HPF3  | NA         | NA        | 5          | 230       | NA         | NA        | NA         | NA        | 5          | 51        | NA         | NA        |
| HPF4  | NA         | NA        | NA         | NA        | NA         | NA        | NA         | NA        | 2          | 25        | NA         | NA        |
| HPF5  | NA         | NA        | NA         | NA        | NA         | NA        | NA         | NA        | 1          | 15        | NA         | NA        |
| HPF6  | NA         | NA        | NA         | NA        | NA         | NA        | NA         | NA        | 1          | 21        | NA         | NA        |
| HPF7  | NA         | NA        | NA         | NA        | NA         | NA        | NA         | NA        | 1          | 13        | NA         | NA        |
| HPF8  | NA         | NA        | NA         | NA        | NA         | NA        | NA         | NA        | 2          | 5         | NA         | NA        |
| HPF9  | NA         | NA        | NA         | NA        | NA         | NA        | NA         | NA        | 1          | 19        | NA         | NA        |
| HPF10 | NA         | NA        | NA         | NA        | NA         | NA        | NA         | NA        | 1          | 6         | NA         | NA        |
| HPF11 | NA         | NA        | NA         | NA        | NA         | NA        | NA         | NA        | 1          | 20        | NA         | NA        |
| HPF12 | NA         | NA        | NA         | NA        | NA         | NA        | NA         | NA        | 1          | 15        | NA         | NA        |
| HPF13 | NA         | NA        | NA         | NA        | NA         | NA        | NA         | NA        | 1          | 4         | NA         | NA        |
|       | 5          | 292       | 8          | 410       | 12         | 324       | 10         | 608       | 24         | 580       | 4          | 318       |

## 2.5 OPT257

Table 14: leuko/parasite data per HPF for the six readings of TBS OPT257.

|       | leuko<br>A | para<br>A | leuko<br>A | para<br>A | leuko<br>B | para<br>B | leuko<br>C | para<br>C | leuko<br>D | para<br>D | leuko<br>E | para<br>E |
|-------|------------|-----------|------------|-----------|------------|-----------|------------|-----------|------------|-----------|------------|-----------|
| HPF1  | 0          | 0         | 0          | 0         | 0          | 0         | 0          | 0         | 0          | 0         | 0          | 0         |
| HPF2  | 8          | 0         | 12         | 0         | 10         | 0         | 19         | 1         | 10         | 0         | 6          | 0         |
| HPF3  | 8          | 0         | 15         | 0         | 5          | 0         | 12         | 0         | 10         | 0         | 6          | 0         |
| HPF4  | 9          | 0         | 11         | 0         | 13         | 0         | 24         | 0         | 10         | 0         | 10         | 0         |
| HPF5  | 14         | 0         | 7          | 0         | 7          | 0         | 22         | 0         | 8          | 0         | 10         | 0         |
| HPF6  | 17         | 0         | 14         | 0         | 7          | 0         | 15         | 1         | 8          | 0         | 8          | 0         |
| HPF7  | 9          | 0         | 11         | 0         | 10         | 0         | 10         | 0         | 9          | 0         | 11         | 0         |
| HPF8  | 11         | 0         | 14         | 0         | 14         | 0         | 8          | 0         | 15         | 0         | 14         | 0         |
| HPF9  | 16         | 0         | 19         | 0         | 7          | 0         | 32         | 0         | 9          | 0         | 12         | 0         |
| HPF10 | 17         | 0         | 15         | 0         | 7          | 0         | 11         | 0         | 10         | 0         | 7          | 0         |
| HPF11 | 16         | 0         | 20         | 0         | 17         | 0         | 8          | 0         | 8          | 0         | 10         | 0         |
| HPF12 | 19         | 0         | 16         | 0         | 12         | 0         | 12         | 0         | 4          | 0         | 8          | 0         |
| HPF13 | 9          | 0         | 11         | 0         | 13         | 0         | 13         | 0         | 12         | 0         | 7          | 0         |
| HPF14 | 10         | 0         | 18         | 0         | 13         | 0         | 10         | 0         | 6          | 0         | 12         | 0         |
| HPF15 | 10         | 1         | 14         | 0         | 9          | 0         | 10         | 0         | 10         | 0         | 13         | 0         |
| HPF16 | 3          | 0         | 16         | 0         | 13         | 0         | 23         | 0         | 10         | 0         | 15         | 0         |
| HPF17 | 15         | 0         | 18         | 0         | 10         | 0         | 24         | 0         | 11         | 0         | 10         | 0         |
| HPF18 | 19         | 0         | 20         | 0         | 8          | 0         | 32         | 0         | 10         | 0         | 7          | 0         |
| HPF19 | 11         | 0         | 13         | 0         | 11         | 0         | 10         | 0         | 7          | 0         | 10         | 0         |
| HPF20 | 15         | 0         | 18         | 0         | 4          | 0         | 9          | 0         | 19         | 0         | 10         | 0         |
| HPF21 | 13         | 0         | 8          | 0         | 9          | 0         | 9          | 0         | 22         | 0         | 10         | 0         |
| HPF22 | 17         | 0         | 15         | 0         | 8          | 0         | 4          | 0         | 15         | 0         | 7          | 0         |
| HPF23 | 22         | 0         | 16         | 0         | 5          | 0         | 18         | 0         | 17         | 0         | 19         | 0         |
| HPF24 | 15         | 0         | 16         | 0         | 17         | 0         | 11         | 0         | 11         | 0         | 10         | 0         |
| HPF25 | 19         | 0         | 14         | 0         | 18         | 0         | 6          | 0         | 11         | 0         | 11         | 0         |
| HPF26 | 14         | 0         | 17         | 0         | 9          | 0         | 11         | 0         | 8          | 0         | 9          | 0         |
| HPF27 | 18         | 0         | 12         | 0         | 12         | 0         | 16         | 0         | 7          | 0         | 10         | 0         |
| HPF28 | 10         | 0         | 19         | 0         | 12         | 0         | 17         | 0         | 9          | 0         | 14         | 0         |
| HPF29 | 20         | 0         | 20         | 0         | 9          | 0         | 8          | 0         | 29         | 0         | 5          | 0         |
| HPF30 | 14         | 0         | 12         | 0         | 22         | 0         | 7          | 0         | 7          | 0         | 8          | 0         |
| HPF31 | 19         | 0         | 16         | 0         | 8          | 0         | 17         | 0         | 5          | 0         | 14         | 0         |
| HPF32 | 11         | 0         | 11         | 0         | 13         | 0         | 17         | 0         | 22         | 0         | 10         | 0         |
| HPF33 | 16         | 0         | 8          | 0         | 10         | 0         | 16         | 0         | 31         | 0         | 4          | 0         |
| HPF34 | 13         | 0         | 8          | 0         | 7          | 0         | 4          | 0         | 31         | 0         | 8          | 0         |
| HPF35 | 25         | 0         | 11         | 0         | 14         | 0         | 17         | 0         | 6          | 0         | 15         | 0         |
| HPF36 | 13         | 0         | 9          | 0         | 9          | 0         | 15         | 0         | 32         | 0         | 13         | 0         |
| HPF37 | 13         | 0         | 13         | 0         | 9          | 0         | 15         | 0         | 5          | 0         | 14         | 0         |
| HPF38 | 11         | 0         | NA         | NA        | 14         | 0         | 2          | 0         | 7          | 0         | 13         | 0         |
| HPF39 | NA         | NA        | NA         | NA        | 14         | 0         | NA         | NA        | 24         | 0         | 4          | 0         |
| HPF40 | NA         | NA        | NA         | NA        | 15         | 0         | NA         | NA        | 12         | 0         | 8          | 0         |
| HPF41 | NA         | NA        | NA         | NA        | 24         | 0         | NA         | NA        | 5          | 0         | 11         | 0         |
| HPF42 | NA         | NA        | NA         | NA        | 8          | 0         | NA         | NA        | 16         | 0         | 10         | 0         |
| HPF43 | NA         | NA        | NA         | NA        | 10         | 0         | NA         | NA        | 6          | 0         | 11         | 0         |
| HPF44 | NA         | NA        | NA         | NA        | 6          | 0         | NA         | NA        | NA         | NA        | 7          | 0         |
| HPF45 | NA         | NA        | NA         | NA        | 10         | 0         | NA         | NA        | NA         | NA        | 9          | 0         |
| HPF46 | NA         | NA        | NA         | NA        | 19         | 0         | NA         | NA        | NA         | NA        | 10         | 0         |
| HPF47 | NA         | NA        | NA         | NA        | NA         | NA        | NA         | NA        | NA         | NA        | 7          | 0         |

|       | leuko<br>A | para<br>A | leuko<br>A | para<br>A | leuko<br>B | para<br>B | leuko<br>C | para<br>C | leuko<br>D | para<br>D | leuko<br>E | para<br>E |
|-------|------------|-----------|------------|-----------|------------|-----------|------------|-----------|------------|-----------|------------|-----------|
| HPF48 | NA         | NA        | NA         | NA        | NA         | NA        | NA         | NA        | NA         | NA        | 6          | 0         |
| HPF49 | NA         | NA        | NA         | NA        | NA         | NA        | NA         | NA        | NA         | NA        | 10         | 0         |
| HPF50 | NA         | NA        | NA         | NA        | NA         | NA        | NA         | NA        | NA         | NA        | 6          | 0         |
| HPF51 | NA         | NA        | NA         | NA        | NA         | NA        | NA         | NA        | NA         | NA        | 10         | 0         |
| HPF52 | NA         | NA        | NA         | NA        | NA         | NA        | NA         | NA        | NA         | NA        | 7          | 0         |
| HPF53 | NA         | NA        | NA         | NA        | NA         | NA        | NA         | NA        | NA         | NA        | 9          | 0         |
| HPF54 | NA         | NA        | NA         | NA        | NA         | NA        | NA         | NA        | NA         | NA        | 8          | 0         |
|       | 519        | 1         | 507        | 0         | 501        | 0         | 514        | 2         | 524        | 0         | 513        | 0         |

## 2.6 OPT271

Table 15: leuko/parasite data per HPF for the six readings of TBS OPT271.

|       | leuko<br>A | para<br>A | leuko<br>A | para<br>A | leuko<br>B | para<br>B | leuko<br>C | para<br>C | leuko<br>D | para<br>D | leuko<br>E | para<br>E |
|-------|------------|-----------|------------|-----------|------------|-----------|------------|-----------|------------|-----------|------------|-----------|
| HPF1  | 0          | 0         | 0          | 0         | 0          | 3         | 0          | 0         | 0          | 0         | 0          | 0         |
| HPF2  | 13         | 0         | 7          | 0         | 6          | 0         | 8          | 0         | 14         | 11        | 6          | 4         |
| HPF3  | 6          | 0         | 1          | 0         | 5          | 0         | 9          | 0         | 19         | 7         | 2          | 1         |
| HPF4  | 6          | 0         | 7          | 0         | 9          | 1         | 14         | 0         | 13         | 12        | 7          | 4         |
| HPF5  | 7          | 0         | 8          | 0         | 4          | 2         | 9          | 0         | 11         | 13        | 2          | 1         |
| HPF6  | 13         | 0         | 10         | 0         | 9          | 4         | 9          | 0         | 13         | 6         | 9          | 1         |
| HPF7  | 6          | 3         | 5          | 1         | 6          | 0         | 5          | 0         | 15         | 15        | 8          | 0         |
| HPF8  | 9          | 3         | 7          | 0         | 8          | 11        | 7          | 0         | 18         | 10        | 4          | 2         |
| HPF9  | 2          | 1         | 9          | 0         | 6          | 4         | 21         | 0         | 22         | 18        | 4          | 5         |
| HPF10 | 8          | 2         | 5          | 0         | 8          | 6         | 12         | 0         | 12         | 9         | 9          | 3         |
| HPF11 | 4          | 2         | 7          | 0         | 10         | 0         | 12         | 0         | 5          | 9         | 3          | 2         |
| HPF12 | 7          | 1         | 11         | 0         | 10         | 0         | 12         | 0         | 9          | 14        | 5          | 3         |
| HPF13 | 10         | 0         | 8          | 0         | 8          | 2         | 12         | 0         | 15         | 18        | 2          | 2         |
| HPF14 | 10         | 1         | 11         | 0         | 5          | 3         | 6          | 0         | 12         | 8         | 8          | 2         |
| HPF15 | 10         | 0         | 5          | 0         | 6          | 1         | 7          | 0         | 13         | 10        | 3          | 1         |
| HPF16 | 4          | 0         | 6          | 0         | 9          | 2         | 14         | 0         | 10         | 11        | 8          | 0         |
| HPF17 | 9          | 0         | 7          | 2         | 5          | 0         | 10         | 0         | NA         | NA        | 7          | 2         |
| HPF18 | 11         | 0         | 3          | 1         | 6          | 2         | 6          | 0         | NA         | NA        | 7          | 2         |
| HPF19 | 5          | 2         | 6          | 1         | 3          | 1         | 8          | 0         | NA         | NA        | 5          | 1         |
| HPF20 | 10         | 0         | 8          | 0         | 2          | 1         | 8          | 0         | NA         | NA        | 8          | 1         |
| HPF21 | 3          | 0         | 5          | 0         | 10         | 3         | 7          | 0         | NA         | NA        | 8          | 0         |
| HPF22 | NA         | NA        | 11         | 2         | 8          | 0         | 6          | 0         | NA         | NA        | 2          | 0         |
| HPF23 | NA         | NA        | 5          | 0         | 5          | 2         | 1          | 0         | NA         | NA        | NA         | NA        |
| HPF24 | NA         | NA        | 3          | 0         | 8          | 0         | 6          | 0         | NA         | NA        | NA         | NA        |
| HPF25 | NA         | NA        | NA         | NA        | 4          | 2         | 7          | 0         | NA         | NA        | NA         | NA        |
| HPF26 | NA         | NA        | NA         | NA        | 6          | 0         | 7          | 0         | NA         | NA        | NA         | NA        |
| HPF27 | NA         | NA        | NA         | NA        | 7          | 1         | 5          | 0         | NA         | NA        | NA         | NA        |
| HPF28 | NA         | NA        | NA         | NA        | 4          | 1         | 9          | 2         | NA         | NA        | NA         | NA        |
| HPF29 | NA         | NA        | NA         | NA        | 9          | 5         | 19         | 0         | NA         | NA        | NA         | NA        |
| HPF30 | NA         | NA        | NA         | NA        | 10         | 3         | 4          | 1         | NA         | NA        | NA         | NA        |
| HPF31 | NA         | NA        | NA         | NA        | 3          | 4         | 5          | 1         | NA         | NA        | NA         | NA        |
| HPF32 | NA         | NA        | NA         | NA        | 3          | 0         | 8          | 1         | NA         | NA        | NA         | NA        |
| HPF33 | NA         | NA        | NA         | NA        | NA         | NA        | 8          | 0         | NA         | NA        | NA         | NA        |
| HPF34 | NA         | NA        | NA         | NA        | NA         | NA        | 2          | 0         | NA         | NA        | NA         | NA        |
| HPF35 | NA         | NA        | NA         | NA        | NA         | NA        | 8          | 0         | NA         | NA        | NA         | NA        |
| HPF36 | NA         | NA        | NA         | NA        | NA         | NA        | 8          | 0         | NA         | NA        | NA         | NA        |
| HPF37 | NA         | NA        | NA         | NA        | NA         | NA        | 7          | 0         | NA         | NA        | NA         | NA        |
| HPF38 | NA         | NA        | NA         | NA        | NA         | NA        | 5          | 0         | NA         | NA        | NA         | NA        |
| HPF39 | NA         | NA        | NA         | NA        | NA         | NA        | 6          | 0         | NA         | NA        | NA         | NA        |
| HPF40 | NA         | NA        | NA         | NA        | NA         | NA        | 29         | 0         | NA         | NA        | NA         | NA        |
| HPF41 | NA         | NA        | NA         | NA        | NA         | NA        | 6          | 0         | NA         | NA        | NA         | NA        |
| HPF42 | NA         | NA        | NA         | NA        | NA         | NA        | 9          | 0         | NA         | NA        | NA         | NA        |
| HPF43 | NA         | NA        | NA         | NA        | NA         | NA        | 29         | 0         | NA         | NA        | NA         | NA        |
| HPF44 | NA         | NA        | NA         | NA        | NA         | NA        | 21         | 0         | NA         | NA        | NA         | NA        |
| HPF45 | NA         | NA        | NA         | NA        | NA         | NA        | 5          | 0         | NA         | NA        | NA         | NA        |
| HPF46 | NA         | NA        | NA         | NA        | NA         | NA        | 8          | 0         | NA         | NA        | NA         | NA        |
| HPF47 | NA         | NA        | NA         | NA        | NA         | NA        | 26         | 0         | NA         | NA        | NA         | NA        |

|       | leuko<br>A | para<br>A | leuko<br>A | para<br>A | leuko<br>B | para<br>B | leuko<br>C | para<br>C | leuko<br>D | para<br>D | leuko<br>E | para<br>E |
|-------|------------|-----------|------------|-----------|------------|-----------|------------|-----------|------------|-----------|------------|-----------|
| HPF48 | NA         | NA        | NA         | NA        | NA         | NA        | 35         | 0         | NA         | NA        | NA         | NA        |
| HPF49 | NA         | NA        | NA         | NA        | NA         | NA        | 13         | 2         | NA         | NA        | NA         | NA        |
| HPF50 | NA         | NA        | NA         | NA        | NA         | NA        | 3          | 0         | NA         | NA        | NA         | NA        |
|       | 153        | 15        | 155        | 7         | 202        | 64        | 501        | 7         | 201        | 171       | 117        | 37        |

## 2.7 SL:13

Table 16: leuko/parasite data per HPF for the six readings of TBS SL:13.

|       | leuko<br>A | para<br>A | leuko<br>A | para<br>A | leuko<br>B | para<br>B | leuko<br>C | para<br>C | leuko<br>D | para<br>D | leuko<br>E | para<br>E |
|-------|------------|-----------|------------|-----------|------------|-----------|------------|-----------|------------|-----------|------------|-----------|
| HPF1  | 0          | 0         | 0          | 0         | 0          | 0         | 0          | 0         | 0          | 0         | 0          | 0         |
| HPF2  | 9          | 6         | 7          | 6         | 8          | 8         | 12         | 24        | 6          | 0         | 2          | 15        |
| HPF3  | 10         | 10        | 9          | 5         | 4          | 4         | 7          | 14        | 8          | 6         | 6          | 21        |
| HPF4  | 6          | 0         | 8          | 9         | 7          | 5         | 9          | 3         | 11         | 0         | 3          | 10        |
| HPF5  | 7          | 15        | 1          | 7         | 4          | 8         | 8          | 9         | 4          | 8         | 3          | 20        |
| HPF6  | 8          | 6         | 7          | 16        | 6          | 9         | 7          | 6         | 13         | 8         | 3          | 25        |
| HPF7  | 8          | 6         | 3          | 15        | 4          | 10        | 4          | 6         | 13         | 9         | 8          | 16        |
| HPF8  | 5          | 11        | 4          | 6         | 6          | 14        | 16         | 16        | 18         | 20        | 4          | 18        |
| HPF9  | 7          | 11        | 5          | 10        | 8          | 16        | 10         | 9         | 14         | 4         | 3          | 17        |
| HPF10 | 11         | 19        | 3          | 6         | 9          | 0         | 8          | 14        | 9          | 0         | 3          | 22        |
| HPF11 | 3          | 7         | 10         | 10        | 15         | 8         | 8          | 0         | 9          | 8         | 6          | 15        |
| HPF12 | 11         | 7         | 12         | 15        | 3          | 12        | 4          | 19        | 8          | 0         | 8          | 17        |
| HPF13 | 12         | 0         | 7          | 12        | 6          | 0         | 8          | 19        | 4          | 19        | 8          | 18        |
| HPF14 | 8          | 16        | 5          | 7         | 6          | 25        | 7          | 15        | 6          | 12        | NA         | NA        |
| HPF15 | 6          | 5         | 10         | 14        | 2          | 3         | 5          | 12        | 13         | 11        | NA         | NA        |
| HPF16 | 6          | 18        | 6          | 3         | 4          | 12        | 7          | 6         | 11         | 13        | NA         | NA        |
| HPF17 | 9          | 11        | 11         | 7         | 9          | 7         | 12         | 3         | 15         | 15        | NA         | NA        |
| HPF18 | 7          | 3         | 6          | 8         | 12         | 13        | 11         | 2         | 11         | 14        | NA         | NA        |
| HPF19 | 5          | 0         | 11         | 9         | 8          | 7         | 10         | 4         | 11         | 19        | NA         | NA        |
| HPF20 | 7          | 6         | 10         | 15        | 11         | 7         | 3          | 7         | 9          | 12        | NA         | NA        |
| HPF21 | 7          | 0         | 8          | 15        | 13         | 11        | 3          | 9         | 9          | 20        | NA         | NA        |
| HPF22 | 7          | 1         | 7          | 8         | 7          | 11        | 10         | 6         | NA         | NA        | NA         | NA        |
| HPF23 | 6          | 4         | NA         | NA        | 10         | 3         | 12         | 2         | NA         | NA        | NA         | NA        |
| HPF24 | 1          | 8         | NA         | NA        | 8          | 17        | NA         | NA        | NA         | NA        | NA         | NA        |
| HPF25 | 12         | 5         | NA         | NA        | 12         | 0         | NA         | NA        | NA         | NA        | NA         | NA        |
| HPF26 | 7          | 1         | NA         | NA        | NA         | NA        | NA         | NA        | NA         | NA        | NA         | NA        |
| HPF27 | 4          | 1         | NA         | NA        | NA         | NA        | NA         | NA        | NA         | NA        | NA         | NA        |
| HPF28 | 2          | 7         | NA         | NA        | NA         | NA        | NA         | NA        | NA         | NA        | NA         | NA        |
| HPF29 | 4          | 5         | NA         | NA        | NA         | NA        | NA         | NA        | NA         | NA        | NA         | NA        |
| HPF30 | 4          | 4         | NA         | NA        | NA         | NA        | NA         | NA        | NA         | NA        | NA         | NA        |
| HPF31 | 6          | 6         | NA         | NA        | NA         | NA        | NA         | NA        | NA         | NA        | NA         | NA        |
|       | 205        | 199       | 150        | 203       | 182        | 210       | 181        | 205       | 202        | 198       | 57         | 214       |



## 2.8 SL007

Table 17: leuko/parasite data per HPF for the five readings of TBS SL007.

|       | leuko A | para A | leuko A | para A | leuko B | para B | leuko D | para D | leuko E | para E |
|-------|---------|--------|---------|--------|---------|--------|---------|--------|---------|--------|
| HPF1  | 0       | 0      | 0       | 0      | 0       | 4      | 0       | 0      | 0       | 0      |
| HPF2  | 4       | 0      | 11      | 1      | 10      | 3      | 26      | 0      | 10      | 0      |
| HPF3  | 12      | 1      | 15      | 1      | 10      | 0      | 3       | 4      | 11      | 1      |
| HPF4  | 12      | 0      | 15      | 1      | 9       | 1      | 21      | 3      | 8       | 0      |
| HPF5  | 13      | 0      | 13      | 0      | 11      | 2      | 6       | 0      | 17      | 2      |
| HPF6  | 14      | 0      | 13      | 1      | 7       | 2      | 11      | 9      | 10      | 1      |
| HPF7  | 14      | 0      | 12      | 0      | 8       | 0      | 4       | 0      | 9       | 1      |
| HPF8  | 10      | 3      | 19      | 0      | 8       | 3      | 14      | 7      | 12      | 2      |
| HPF9  | 7       | 1      | 19      | 3      | 10      | 0      | 30      | 2      | 11      | 0      |
| HPF10 | 16      | 0      | 15      | 2      | 10      | 0      | 28      | 1      | 11      | 1      |
| HPF11 | 16      | 0      | 12      | 0      | 8       | 2      | 29      | 2      | 7       | 0      |
| HPF12 | 10      | 0      | 16      | 0      | 9       | 0      | 12      | 0      | 14      | 1      |
| HPF13 | 20      | 0      | 14      | 2      | 5       | 1      | 16      | 2      | 10      | 1      |
| HPF14 | 12      | 0      | 11      | 1      | 8       | 0      | 16      | 0      | 18      | 0      |
| HPF15 | 15      | 0      | 11      | 1      | 10      | 0      | 6       | 1      | 12      | 1      |
| HPF16 | 12      | 0      | 16      | 0      | 9       | 1      | 12      | 0      | 9       | 0      |
| HPF17 | 10      | 0      | NA      | NA     | 2       | 1      | 9       | 6      | 12      | 3      |
| HPF18 | 20      | 0      | NA      | NA     | 7       | 0      | NA      | NA     | 11      | 0      |
| HPF19 | 12      | 0      | NA      | NA     | 7       | 2      | NA      | NA     | 7       | 1      |
| HPF20 | 19      | 1      | NA      | NA     | 9       | 1      | NA      | NA     | 23      | 4      |
| HPF21 | 13      | 0      | NA      | NA     | 6       | 1      | NA      | NA     | NA      | NA     |
| HPF22 | 12      | 0      | NA      | NA     | 12      | 2      | NA      | NA     | NA      | NA     |
| HPF23 | 16      | 2      | NA      | NA     | 6       | 0      | NA      | NA     | NA      | NA     |
| HPF24 | 16      | 1      | NA      | NA     | 8       | 4      | NA      | NA     | NA      | NA     |
| HPF25 | 18      | 0      | NA      | NA     | 10      | 1      | NA      | NA     | NA      | NA     |
| HPF26 | 20      | 0      | NA      | NA     | 5       | 0      | NA      | NA     | NA      | NA     |
| HPF27 | 14      | 0      | NA      | NA     | 9       | 1      | NA      | NA     | NA      | NA     |
| HPF28 | 17      | 0      | NA      | NA     | NA      | NA     | NA      | NA     | NA      | NA     |
| HPF29 | 3       | 3      | NA      | NA     | NA      | NA     | NA      | NA     | NA      | NA     |
| HPF30 | 20      | 0      | NA      | NA     | NA      | NA     | NA      | NA     | NA      | NA     |
| HPF31 | 11      | 2      | NA      | NA     | NA      | NA     | NA      | NA     | NA      | NA     |
| HPF32 | 18      | 0      | NA      | NA     | NA      | NA     | NA      | NA     | NA      | NA     |
| HPF33 | 19      | 0      | NA      | NA     | NA      | NA     | NA      | NA     | NA      | NA     |
| HPF34 | 18      | 0      | NA      | NA     | NA      | NA     | NA      | NA     | NA      | NA     |
| HPF35 | 16      | 0      | NA      | NA     | NA      | NA     | NA      | NA     | NA      | NA     |
| HPF36 | 12      | 0      | NA      | NA     | NA      | NA     | NA      | NA     | NA      | NA     |
| HPF37 | 12      | 0      | NA      | NA     | NA      | NA     | NA      | NA     | NA      | NA     |
| HPF38 | 12      | 0      | NA      | NA     | NA      | NA     | NA      | NA     | NA      | NA     |
|       | 515     | 14     | 212     | 13     | 213     | 32     | 243     | 37     | 222     | 19     |

## 2.9 SL057

Table 18: leuko/parasite data per HPF for the six readings of TBS SL057.

|      | leuko<br>A | para<br>A | leuko<br>A | para<br>A | leuko<br>B | para<br>B | leuko<br>C | para<br>C | leuko<br>D | para<br>D | leuko<br>E | para<br>E |
|------|------------|-----------|------------|-----------|------------|-----------|------------|-----------|------------|-----------|------------|-----------|
| HPF1 | 0          | 0         | 0          | 0         | 0          | 0         | 0          | 0         | 0          | 0         | 0          | 0         |
| HPF2 | 9          | 82        | 7          | 1         | 8          | 0         | 3          | 0         | 24         | 380       | 11         | 127       |
| HPF3 | 14         | 35        | 3          | 11        | 6          | 0         | 18         | 141       | NA         | NA        | 8          | 116       |
| HPF4 | 14         | 13        | 7          | 14        | 17         | 211       | 28         | 221       | NA         | NA        | NA         | NA        |
| HPF5 | 10         | 41        | 15         | 89        | NA         | NA        | NA         | NA        | NA         | NA        | NA         | NA        |
| HPF6 | 18         | 58        | 16         | 83        | NA         | NA        | NA         | NA        | NA         | NA        | NA         | NA        |
| HPF7 | NA         | NA        | 18         | 40        | NA         | NA        | NA         | NA        | NA         | NA        | NA         | NA        |
|      | 65         | 229       | 66         | 238       | 31         | 211       | 49         | 362       | 24         | 380       | 19         | 243       |
